# Supplementary material for: Systematic Mapping of Protein Mutational Space by Prolonged Drift Reveals the Deleterious Effects of Seemingly Neutral Mutations
Source: PLoS Comput Biol. 2015 Aug 14;11(8):e1004421. doi: 10.1371/journal.pcbi.1004421 (PMC4537296; doi:10.1371/journal.pcbi.1004421)
Supplement: S3 File — (XLSX) [file pcbi.1004421.s003.xlsx]

## Sheet: Main
Systematic mapping of protein mutational space by prolonged drift reveals the deleterious effects of seemingly neutral mutations
Liat Rockah-Shmuel, Ágnes Tóth-Petróczy & Dan S. Tawfik
File S3: Processed data and the net frequencies of mutations in G0 to G17.
G0, G3, G7 and G17:
The ‘net’ frequencies of mutations (after background subtraction) in the naïve (G0) and selected libraries (G3, G7 and G17).
Residues 2 to 330 - the mutated ORF of M.HaeIII
* Columns D to BO – list all possible 64 codon
* Columns BP to CJ - list all possible 20 amino acids and stop codon ("*")
* Columns CK and CL - the positional frequency of nonsynonymous mutations (Na; sum of frequencies of all non synonymous mutations within a given position) and the positional mutation frequency (Nt : sum of frequencies of all mutations within a given position)
Blank cells are codons/amino acid mutations with mutation frequency equal to zero.
Single nt nonSyn:
Total frequency for each possible single amino acid mutation in each round, derived Wrel, predictors scores and biophysical scores
Syn:
Total frequencies for each possible synonymous mutation in each round and derived Wrel
nonSense:
Total frequencies for each possible nonsense mutation (stop codons, "*") in each round and derived Wrel
# of nt exchanges
The number of nucleotide exchanges needed to mutated to the given codon from the reference M.HaeIII sequence
1= single nt; 2= double nt; 3= triple nt.

## Sheet: G0
			TAA	TAG	TGA	GCA	GCC	GCG	GCT	TGC	TGT	GAC	GAT	GAA	GAG	TTC	TTT	GGA	GGC	GGG	GGT	CAC	CAT	ATA	ATC	ATT	AAA	AAG	CTA	CTC	CTG	CTT	TTA	TTG	ATG	AAC	AAT	CCA	CCC	CCG	CCT	CAA	CAG	AGA	AGG	CGA	CGC	CGG	CGT
			-	-	-	A	A	A	A	C	C	D	D	E	E	F	F	G	G	G	G	H	H	I	I	I	K	K	L	L	L	L	L	L	M	N	N	P	P	P	P	Q	Q	R	R	R	R	R	R
2	N	AAT	0	0	0	0	0	0	0	0	0	0	0.00190164	0	0	0	0	0	0	0	0	0	9.9453e-05	0	0	0.00292684	0.00134048	0.000369242	0	0	0	0	0	0	0	0.00102753		0	0	0	0	0	0	0	0	0	0	0	0
3	L	TTA	0.000949075	0	0	0	0	0	0	0	0	0	0	0	0	7.68205e-05	0.00133564	0	0	0	0	0	0	0.00135547	0	0	0	0	0.000949075	0	0	0		0.000711187	0	0	0	0	0	0	0	0	0	0	0	0	0	0	0
4	I	ATT	0	0	0	0	0	0	0	0	0	0	0	0	0	0	0.00209093	0	0	0	0	0	0	0.000999087	0.00121557		0	0	0	0	0	0.000208439	0	0	0.000170789	0	0.00109321	0	0	0	0	0	0	0	0	0	0	0	0
5	S	AGT	0	0	0	0	0	0	0	0	0.0012244	0	0	0	0	0	0	0	0	0	0.00109348	0	0	0	0	0.000756842	0	0	0	0	0	0	0	0	0	0	0.00309462	0	0	0	0	0	0	0.000728789	0.000345393	0	0	0	0.000251882
6	L	CTT	0	0	0	0	0	0	0	0	0	0	0	0	0	0	0.00118972	0	0	0	0	0	0.00200628	0	0	0.00118972	0	0	0.00144097	0.00125253	0.000534673		0	0	0	0	0	0	0	0	0.0079914	0	0	0	0	0	0	0	0.000516726
7	F	TTT	0	0	0	0	0	0	0	0	0.000765845	0	0	0	0	0.00173775		0	0	0	0	0	0	0	1.88211e-05	0.00277785	0	0	0	0	0	0.00153313	0.00216402	0.000407777	0	0	0	0	0	0	0	0	0	0	0	0	0	0	0
8	S	TCA	0.000389413	0	4.47891e-05	0.000135048	0	0	0	0	0	0	0	0	0	0	0	0	0	0	0	0	0	0	0	0	0	0	0	0	0	0	0.000988402	0	0	0	0	0.00166124	0	0	0	0	0	0	0	0	0	0	0
9	G	GGT	0	0	0	0	0	0	0.000534354	0	0.00292463	0	0.00267597	0	0	0	0	0.000879259	0.00203429	0.000486228		0	0	0	0	0	0	0	0	0	0	0	0	0	0	0	0	0	0	0	0	0	0	0	0	0	0	0	0.00065467
10	A	GCA	0	0	0		0.000220071	0.00232263	0.00137457	0	0	0	0	0.000288882	0	0	0	0	0	0	0	0	0	0	0	0	0	0	0	0	0	0	0	0	0	0	0	0.000587063	0	0	0	0	0	0	0	0	0	0	0
11	G	GGG	0	0	0	0	0	0.000188486	0	0	0	0	0	0	0.00184582	0	0	0.0013649	3.31114e-05		0.000506635	0	0	0	0	0	0	0	0	0	0	0	0	0	0	0	0	0	0	0	0	0	0	0	0.00362893	0	0	0.000462242	0
12	G	GGA	0	0	0.00130149	0.000466996	0	0	0	0	0	0	0	0.00198562	0	0	0		3.8473e-05	0.00382752	0.00182774	0	0	0	0	0	0	0	0	0	0	0	0	0	0	0	0	0	0	0	0	0	0	0.0018503	0	0.000459478	0	0	0
13	L	TTA	0.000232315	0	0	0	0	0	0	0	0	0	0	0	0	0.000112394	0.00121417	0	0	0	0	0	0	0.001469	0	0	0	0	0.00153646	0	0	0		0.00109425	0	0	0	0	0	0	0	0	0	0	0	0	0	0	0
14	D	GAT	0	0	0	0	0	0	9.48192e-05	0	0	0.00207568		0.00377573	0.000261788	0	0	0	0	0	0.00196184	0	0.000284557	0	0	0	0	0	0	0	0	0	0	0	0	0	0.00174174	0	0	0	0	0	0	0	0	0	0	0	0
15	L	CTT	0	0	0	0	0	0	0	0	0	0	0	0	0	0	0.00214521	0	0	0	0	0	0.00230978	0	0	0.00201982	0	0	0.00176905	0.00213737	0.000342773		0	0	0	0	0	0	0	0	0.0019728	0	0	0	0	0	0	0	0.000311427
16	G	GGC	0	0	0	0	0.00058044	0	0	0.000549553	0	0.0034838	0	0	0	0	0	0.00188541		0.000109416	0.00269619	0	0	0	0	0	0	0	0	0	0	0	0	0	0	0	0	0	0	0	0	0	0	0	0	0	0.000163468	0	0
17	F	TTC	0	0	0	0	0	0	0	7.96402e-05	0	0	0	0	0		0.000853769	0	0	0	0	0	0	0	0.00187076	0	0	0	0	0.00246274	0	0	0.000952433	0	0	0	0	0	0	0	0	0	0	0	0	0	0	0	0
18	Q	CAA	0.00093054	0	0	0	0	0	0	0	0	0	0	2.09761e-06	0	0	0	0	0	0	0	0.000545576	0.00207788	0	0	0	0.00173066	0	0.0015495	0	0	0	0	0	0	0	0	0.000266288	0	0	0		0.00274213	0	0	0.00264401	0	0	0
19	K	AAA	0.00188997	0	0	0	0	0	0	0	0	0	0	0.00183818	0	0	0	0	0	0	0	0	0	0.00203053	0	0		0.00629917	0	0	0	0	0	0	0	0.000684097	0.00174201	0	0	0	0	0.001054	0	0.00229686	0	0	0	0	0
20	A	GCA	0	0	0		0.000169353	0.0015256	0.00116638	0	0	0	0	0.00028665	0	0	0	0.000154691	0	0	0	0	0	0	0	0	0	0	0	0	0	0	0	0	0	0	0	0.000770499	0	0	0	0	0	0	0	0	0	0	0
21	G	GGA	0	0	0.00253127	5.04049e-05	0	0	0	0	0	0	0	0.00208617	0	0	0		0.000167152	0.00145136	0.00166297	0	0	0	0	0	0	0	0	0	0	0	0	0	0	0	0	0	0	0	0	0	0	0.0020205	0	0.000539281	0	0	0
22	F	TTT	0	0	0	0	0	0	0	0	0.000738878	0	0	0	0	0.00151239		0	0	0	0	0	0	0	0	0.000805178	0	0	0	0	0	0.00168182	0.00146819	8.32364e-05	0	0	0	0	0	0	0	0	0	0	0	0	0	0	0
23	R	CGT	0	0	0	0	0	0	0	0	0.00099956	0	0	0	0	0	0	0	0	0	2.5014e-05	0	0.00543194	0	0	0	0	0	0	0	0	0.00100678	0	0	0	0	0	0	0	0	0.000985123	0	0	0	0	0.000963466	0.00140382	9.72026e-05
24	I	ATT	0	0	0	0	0	0	0	0	0	0	0	0	0	0	0.00199003	0	0	0	0	0	0	0.000679521	0.00125023		0	0	0	0	0	2.42687e-05	0	0	3.83601e-05	0	0.00217322	0	0	0	0	0	0	0	0	0	0	0	0
25	I	ATT	0	0	0	0	0	0	0	0	0	0	0	0	0	0	0.00136061	0	0	0	0	0	0	0.00108387	0.00155432		0	0	0	0	0	0	0	0	1.84162e-05	0	0.00192792	0	0	0	0	0	0	0	0	0	0	0	0
26	A	GCC	0	0	0	0.00181182		5.4379e-05	0.00175052	0	0	0.000837736	0	0	0	0	0	0	0.000354098	0	0	0	0	0	0	0	0	0	0	0	0	0	0	0	0	0	0	0	0.000306416	0	0	0	0	0	0	0	0	0	0
27	A	GCA	0	0	0		0.000102345	0.00203951	0.00182502	0	0	0	0	8.89391e-05	0	0	0	0.000102345	0	0	0	0	0	0	0	0	0	0	0	0	0	0	0	0	0	0	0	0.000363762	0	0	0	0	0	0	0	0	0	0	0
28	N	AAT	0	0	0	0	0	0	0	0	0	0	0.0017776	0	0	0	0	0	0	0	0	0	0.000573481	0	0	0.000738882	0.000778578	8.38951e-05	0	0	0	0	0	0	0	0.00151957		0	0	0	0	0	0	0	0	0	0	0	0
29	E	GAA	0.000586327	0	0	7.71145e-05	0	0	0	0	0	0.00034164	0.00224623		0.00269592	0	0	0.00220655	0	0	0	0	0	0	0	0	0.00137329	0	0	0	0	0	0	0	0	0	0	0	0	0	0	0.000374706	0	0	0	0	0	0	0
30	Y	TAT	0.00202879	0.000315399	0	0	0	0	0	0	0.0012614	0	0	0	0	0	0.00198248	0	0	0	0	0	0.00132756	0	0	0	0	0	0	0	0	0	0	0	0	0	0.00113571	0	0	0	0	0	0	0	0	0	0	0	0
31	D	GAT	0	0	0	0	0	0	0.000109076	0	0	0.000894443		0.00149807	0	0	0	0	0	0	0.00145913	0	0.000290814	0	0	0	0	0	0	0	0	0	0	0	0	0	0.00122547	0	0	0	0	0	0	0	0	0	0	0	0
32	K	AAA	0.000418696	0	0	0	0	0	0	0	0	0	0	0.00125374	0	0	0	0	0	0	0	0	0	0.0017975	0	0		0.00169393	0	0	0	0	0	0	0	6.2667e-05	0.00153857	0	0	0	0	0	0	0.00173276	0	0	0	0	0
33	S	TCA	0.000419017	0	7.57813e-05	0.000198828	0	0	0	0	0	0	0	0	0	0	0	0	0	0	0	0	0	0	0	0	0	0	0	0	0	0	0.000995393	0	0	0	0	0.00095006	0	0	0	0	0	0	0	0	0	0	0
34	I	ATA	0	0	0	0	0	0	0	0	0	0	0	0	0	0	0	0	0	0	0	0	0		8.12434e-05	0.00168177	0.00159285	0	0.000252729	0	0	0	0.00305365	0	0.00173893	0	0	0	0	0	0	0	0	0	0	0	0	0	0
35	W	TGG	0	0.0014297	0.0011204	0	0	0	0	0.000173578	0.000602806	0	0	0	0	0	0	0	0	0.000116769	0	0	0	0	0	0	0	0	0	0	0	0	0	0.000684865	0	0	0	0	0	0	0	0	0	0	0.00156226	0	0	0.00189049	0
36	K	AAA	0.000927221	0	0	0	0	0	0	0	0	0	0	0.00212265	0	0	0	0	0	0	0	0	0	0.00123715	0	0		0.00164195	0	0	0	0	0	0	0	0.000218818	0.00118022	0	0	0	0	0.000123942	0	0.00219855	0	0	0	0	0
37	T	ACA	0	0	0	0.00133778	0	0	0	0	0	0	0	0	0	0	0	0	0	0	0	0	0	0.00107306	0	0	0.000402002	0	0	0	0	0	0	0	0	0	0	0.000599008	0	0	0	0	0	0.000174213	0	0	0	0	0
38	Y	TAT	0.00200787	0.000174928	0	0	0	0	0	0	0.00131075	0	6.07443e-05	0	0	0	0.000463391	0	0	0	0	0	0.00110642	0	0	0	0	0	0	0	0	0	0	0	0	0	0.000505459	0	0	0	0	0	0	0	0	0	0	0	0
39	E	GAA	0.000366456	0	0	0.000204385	0	0	0	0	0	0.000918697	0.00220326		0.00189712	0	0	0.00191513	0	0	0	0	0	0	0	0	0.000966717	0	0	0	0	0	0	0	0	0	0	0	0	0	0	7.23275e-05	0	0	0	0	0	0	0
40	S	AGT	0	0	0	0	0	0	0	0	0.00172247	0	0	0	0	0	0	0	0	0	0.00215365	0	0	0	0	0.00119412	0	0	0	0	0	0	0	0	0	0	0.00226296	0	0	0	0	0	0	0.000617184	0.00046536	0	0	0	0.000617184
41	N	AAT	0	0	0	0	0	0	0	0	0	0	0.000849121	0	0	0	0	0	0	0	0	0	4.95899e-05	0	0	0.00162496	0.00154205	0.000132504	0	0	0	0	0	0	0	0.00193293		0	0	0	0	0	0	0	0	0	0	0	0
42	H	CAT	0	0	0	0	0	0	0	0	0	0	0.000144568	0	0	0	0	0	0	0	0	0.00166489		0	0	0	0	0	0	0	0	0.0014193	0	0	0	0	0.000530497	0	0	0	0	0.00158303	0.000360922	0	0	0	0	0	0.00156549
43	S	TCA	0.000785384	0	0.000415948	0.000237002	0	0	0	0	0	0	0	0	0	0	0	0	0	0	0	0	0	0	0	0	0	0	0	0	0	0	0.00117791	0	0	0	0	0.00176093	0	0	0	0	0	0	0	0	0	0	0
44	A	GCT	0	0	0	0.000700435	0.000924634	1.05939e-05		0	0	0	0.0013098	0	0	0	0	0	0	0	0.000516478	0	0	0	0	0	0	0	0	0	0	0	0	0	0	0	0	0	0	0	0.000602708	0	0	0	0	0	0	0	0
45	K	AAA	0.000564904	0	0	0	0	0	0	0	0	0	0	0.00138874	0	0	0	0	0	0	0	0	0	0.00133031	0	0		0.000909631	0	0	0	0	0	0	0	0.000179277	0.00170426	0	0	0	0	5.65777e-05	0	0.00127189	0	0	0	0	0
46	L	TTG	0	0.000941823	0	0	0	0	0	0	0	0	0	0	0	0.000131296	0.000464704	0	0	0	0	0	0	0	0	0	0	0	0	0	0.00178109	0	0.00177534		0.00187881	0	0	0	0	0	0	0	0	0	0	0	0	0	0
47	I	ATC	0	0	0	0	0	0	0	0	0	0	0	0	0	0.00260856	0	0	0	0	0	0	0	0.000476509		0.00171634	0	0	0	2.46073e-05	0	0	0	0	0.000401192	0.00299093	0	0	0	0	0	0	0	0	0	0	0	0	0
48	K	AAA	0.00123707	0	0	0	0	0	0	0	0	0	0	0.0026794	0	0	0	0	0	0	0	0	0	0.00146761	0	0		0.00143214	0	0	0	0	0	0	0	0.00087649	0.00168632	0	0	0	0	0.000604576	0	0.00216513	0	0	0	0	0
49	G	GGC	0	0	0	0	0.000137288	0	0	0.00184443	0	0.00185624	0	0	0	0	0	0.000781157		0.000308592	0.00239378	0	0	0	0	0	0	0	0	0	0	0	0	0	0	0	0	0	0	0	0	0	0	0	0	0	5.45887e-05	0	0
50	D	GAT	0	0	0	0	0	0	2.23566e-05	0	0	0.00120568		0.000807332	0.000133659	0	0	0	0	0	0.00183834	0	0.000326974	0	0	0	0	0	0	0	0	0	0	0	0	0	0.00199651	0	0	0	0	0	0	0	0	0	0	0	0
51	I	ATA	0	0	0	0	0	0	0	0	0	0	0	0	0	0	0	0	0	0	0	0	0		2.84127e-05	0.00151725	0.000514922	0	6.35821e-05	0	0	0	0.00236131	0	0.00137071	0	0	0	0	0	0	0	0	1.0828e-05	0	0	0	0	0
52	S	TCT	0	0	0	0	0	0	0.00019314	0	0.000112889	0	0	0	0	0	0.000852351	0	0	0	0	0	0	0	0	0	0	0	0	0	0	0	0	0	0	0	0	0	0	0	0.00188416	0	0	0	0	0	0	0	0
53	K	AAA	0.000387471	0	0	0	0	0	0	0	0	0	0	0.00101603	0	0	0	0	0	0	0	0	0	0.000875046	0	0		0.000951414	0	0	0	0	0	0	0	0.000399219	0.00089267	0	0	0	0	0.000123122	0	0.00142137	0	0	0	0	0
54	I	ATT	0	0	0	0	0	0	0	0	0	0	0	0	0	0	0.00354901	0	0	0	0	0	0	0.000951774	0.00171567		0	0	0	0	0	0.000252518	0	0	0.000246642	0	0.00114569	0	0	0	0	0	0	0	0	0	0	0	0
55	S	TCT	0	0	0	0	0	0	8.15774e-05	0	0	0	0	0	0	0	0.000679313	0	0	0	0	0	0	0	0	0	0	0	0	0	0	0	0	0	0	0	0	0	0	0	0.00133967	0	0	0	0	0	0	0	0
56	S	TCA	0.000619895	0	5.56436e-05	1.6146e-05	0	0	0	0	0	0	0	0	0	0	0	0	0	0	0	0	0	0	0	0	0	0	0	0	0	0	0.00112772	0	0	0	0	0.00202488	0	0	0	0	0	0	0	0	0	0	0
57	D	GAT	0	0	0	0	0	0	0.0002536	0	0	0.00185114		0.00165716	4.82017e-05	0	0	0	0	0	0.00167427	0	0.000516054	0	0	0	0	0	0	0	0	0	0	0	0	0	0.00199949	0	0	0	0	0	0	0	0	0	0	0	0
58	E	GAA	0.000522822	0	0	0.00012608	0	0	0	0	0	0.000324451	0.00124046		0.00171305	0	0	0.00180056	0	0	0	0	0	0	0	0	0.0012638	0	0	0	0	0	0	0	0	0	0	0	0	0	0	0.000400298	0	0	0	0	0	0	0
59	F	TTC	0	0	0	0	0	0	0	0.00014465	0	0	0	0	0		0.000896856	0	0	0	0	0	0	0	0.00087976	0	0	0	0	0.00211064	0	0	0.000748694	4.20768e-05	0	0	0	0	0	0	0	0	0	0	0	0	0	0	0
60	P	CCT	0	0	0	0	0	0	0	0	0	0	0	0	0	0	0	0	0	0	0	0	0.00208826	0	0	0	0	0	0	0	0	0.00122855	0	0	0	0	0	0.00126788	0.00117236	0.000138451		0	0	0	0	0	0	0	3.59399e-06
61	K	AAG	0	0.000675622	0	0	0	0	0	0	0	0	0	0	0.00152915	0	0	0	0	0	0	0	0	0	0	0	0.00379941		0	0	0	0	0	0	0.00246396	0.000942711	0.00115174	0	0	0	0	0	0.000164668	0	0.00172656	0	0	0	0
62	C	TGT	0	0	0.00119795	0	0	0	0	0.00240659		0	0	0	0	0	0.000440383	0	0	0	0.000717965	0	0	0	0	0	0	0	0	0	0	0	0	0	0	0	0	0	0	0	0	0	0	0	0	0	0	0	0.00230828
63	D	GAT	0	0	0	0	0	0	0.000348878	0	0	0.00185872		0.0014626	0.000124986	0	0	0	0	0	0.00256484	0	0.000532585	0	0	0	0	0	0	0	0	0	0	0	0	0	0.00205964	0	0	0	0	0	0	0	0	0	0	0	0
64	G	GGA	0	0	0.000968133	0.000728563	0	0	0	0	0	0	0	0.00186798	0	0	0		0.000313698	0.00254579	0.00130119	0	0	0	0	0	0	0	0	0	0	0	0	0	0	0	0	0	0	0	0	0	0	0.00101488	0	6.82849e-05	0	0	0
65	I	ATT	0	0	0	0	0	0	0	0	1.32128e-05	0	0	0	0	0	0.00164582	0	0	0	0	0	0	0.00102274	0.00119908		0	0	0	0	0	0.000252707	0	0	0	0	0.00228065	0	0	0	0	0	0	0	0	0	0	0	0
66	I	ATT	0	0	0	0	0	0	0	0	0	0	0	0	0	0	0.00143543	0	0	0	0	0	0	0.00156982	0.00183274		0	0	0	0	0	3.98342e-06	0	0	0.000401284	0	0.00171004	0	0	0	0	0	0	0	0	0	0	0	0
67	G	GGG	0	0	0	0	0	7.13692e-05	0	0	0	0	0	0	0.00219843	0	0	0.00228681	6.55584e-06		0.000908051	0	0	0	0	0	0	0	0	0	0	0	0	0	0	0	0	0	0	0	0	0	0	0	0.00231627	0	0	9.49377e-05	0
68	G	GGG	0	0	0	0	0	0.000294404	0	0	0	0	0	0	0.00185883	0	0	0.00299273	0.000864387		0.000646096	0	0	0	0	0	0	0	0	0	0	0	0	0	0	0	0	0	0	0	0	0	0	0	0.00193765	0	0	0	0
69	P	CCG	0	0	0	0	0	0.000211404	0	0	0	0	0	0	0	0	0	0	0	0	0	0	0	0	0	0	0	0	0	0	0.00168636	0	0	0	0	0	0	0.00463626	0.000481714		0.000528724	0	0.00126914	0	0	0	0	0	0
70	P	CCT	0	0	0	0	0	0	0	0	0	0	0	0	0	0	0	0	0	0	0	0	0.00251465	0	0	0	0	0	0	0	0	0.00139002	0	0	0	0	0	0.00298665	0.00220582	0.00113946		0	0	0	0	0	0	0	9.00146e-06
71	C	TGT	0	0	0.00160481	0	0	0	0	0.0025515		0	0	0	0	0	0.000522881	0	0	0	0.000545421	0	0	0	0	0	0	0	0	0	0	0	0	0	0	0	0	0	0	0	0	0	0	0	0	0	0	0	0.00270364
72	Q	CAA	0.00150077	0	0	0	0	0	0	0	0	0	0	0.00031556	0	0	0	0	0	0	0	0.000600466	0.00165461	0	0	0	0.000600466	0	0.00158624	0	0	0	0	0	0	0	0	0.000224391	0	0	0		0.00192812	0	0	0.00253212	0	0	0
73	S	TCT	0	0	0	0	0	0	2.51923e-05	0	0.000561202	0	0	0	0	0	0.00151918	0	0	0	0	0	0	0	0	0	0	0	0	0	0	0	0	0	0	0	0	0	0	0	0.00137662	0	0	0	0	0	0	0	0
74	W	TGG	0	0.0014375	0.00205522	0	0	0	0	0.000328916	0.000957666	0	0	0	0	0	0	0	0	0.000295824	0	0	0	0	0	0	0	0	0	0	0	0	0	0.000339946	0	0	0	0	0	0	0	0	0	0	0.00171879	0	0	0.001796	0
75	S	AGT	0	0	0	0	0	0	0	0	0.00202848	0	0	0	0	0	0	0	0	0	0.00276168	0	0	0	0	0.0012729	0	0	0	0	0	0	0	0	0	0	0.0027169	0	0	0	0	0	0	0.0014464	0.000528508	0	0	0	0.000410973
76	E	GAG	0	0.000450189	0	0	0	0.000306568	0	0	0	0.000434231	0.00206194	0.00427478		0	0	0	0	0.00215769	0	0	0	0	0	0	0	0.00159384	0	0	0	0	0	0	0	0	0	0	0	0	0	0	0	0	0	0	0	0	0
77	G	GGG	0	0	0	0	0	0.000380494	0	0	0	0	0	0	0.00209949	0	0	0.00113353	0.00026624		0.000806348	0	0	0	0	0	0	0	0	0	0	0	0	0	0	0	0	0	0	0	0	0	0	0	0.00228126	0	0	0.00020392	0
78	G	GGA	0	0	0.00217157	0.000198644	0	0	0	0	0	0	0	0.00245491	0	0	0		0.000219632	0.00263856	0.00397658	0	0	0	0	0	0	0	0	0	0	0	0	0	0	0	0	0	0	0	0	0	0	0.0022083	0	0.000319328	0	0	0
79	S	TCT	0	0	0	0	0	0	8.98509e-05	0	0	0	0	0	0	0	0.00106406	0	0	0	0	0	0	0	0	0	0	0	0	0	0	0	0	0	0	0	0	0	0	0	0.00206904	0	0	0	0	0	0	0	0
80	L	CTT	0	0	0	0	0	0	0	0	0	0	0	0	0	0	0.000809271	0	0	0	0	0	0.00245781	0	0	0.00135374	0	0	0.000582408	0.00115209	0.000355546		0	0	0	0	0	0	0	0	0.00223094	0	0	0	0	0	0	0	0.000970595
81	R	AGA	0	0	0.00159822	0	0	0	0	0	0	0	0	0	0	0	0	0.00195201	0	0	0	0	0	0.0018277	0	0	0.00189464	0	0	0	0	0	0	0	0	0	0	0	0	0	0	0	0		0.00254963	0.000269102	0	0	0
82	G	GGA	0	0	0.00202695	0.00034253	0	0	0	0	0	0	0	0.00132749	0	0	0		0.000142683	0.0020555	0.00154637	0	0	0	0	0	0	0	0	0	0	0	0	0	0	0	0	0	0	0	0	0	0	0.00124184	0	0.0001522	0	0	0
83	I	ATT	0	0	0	0	0	0	0	0	0	0	0	0	0	0	0.00177068	0	0	0	0	0	0	0.00156125	0.0026798		0	0	0	0	0	0.000318939	0	0	0.000195184	0	0.00157077	0	0	0	0	0	0	0	0	0	0	0	0
84	D	GAT	0	0	0	0	0	0	9.99495e-05	0	0	0.00175022		0.00202449	0.000155733	0	0	0	0	0	0.00185249	0	0.000211517	0	0	0	0	0	0	0	0	0	0	0	0	0	0.00144341	0	0	0	0	0	0	0	0	0	0	0	0
85	D	GAT	0	0	0	0	0	0	0.000311682	0	0	0.00154883		0.00375029	0.000274051	0	0	0	0	0	0.00232969	0	0	0	0	0	0	0	0	0	0	0	0	0	0	0	0.00205686	0	0	0	0	0	0	0	0	0	0	0	0
86	P	CCT	0	0	0	0	0	0	0.000656352	0	0	0	0	0	0	0	0	0	0	0	0	0	0.00253543	0	0	0	0	0	0	0	0	0.00182661	0	0	0	0	0	0.00101314	0.00147458	0.000114037		0	0	0	0	0	0	0	0.000456552
87	R	CGG	0	0	0	0	0	0	0	0	0	0	0	0	0	0	0	0	0	0.000245719	0	0	0	0	0	0	0	0	0	0	0.00168485	0	0	0	0	0	0	0	0	0	0	0	0.00279477	0	0.000899443	0.00159549	0.000109331		0.000913552
88	G	GGC	0	0	0	0	0.000652459	0	0	0.000990837	0	0.00344166	0	0	0	0	0	0.000241571		9.53978e-06	0.0029341	0	0	0	0	0	0	0	0	0	0	0	0	0	0	0	0	0	0	0	0	0	0	0	0	0	0.000169061	0	0
89	K	AAA	0.0009539	0	0	0	0	0	0	0	0	0	0	0.00210479	0	0	0	0	0	0	0	0	0	0.000728619	0	0		0.0018942	0	0	0	0	0	0	0	0.000591492	0.00108123	0	0	0	0	0	0	0.00216356	0	0	0	0	0
90	L	CTT	0	0	0	0	0	0	0	0	0	0	0	0	0	0	0.00211742	0	0	0	0	0	0.00166478	0	0	0.000562093	0	0	0.00111103	0.000629506	0.00101954		0	0	0	0	0	0	0	0	0.00450577	0	0	0	0	0	0	0	0.000749887
91	F	TTT	0	0	0	0	0	0	0	0	0.00107056	0	0	0	0	0.00224452		0	0	0	0	0	0	0	0	0.00106121	0	0	0	0	0	0.00140264	0.00214162	0.000710422	0	0	0	0	0	0	0	0	0	0	0	0	0	0	0
92	Y	TAT	0.00168789	0.000154633	0	0	0	0	0	0	0.0012426	0	5.82311e-05	0	0	0	0.000944215	0	0	0	0	0	0.00135737	0	0	0	0	0	0	0	0	0	0	0	0	0	0.000480565	0	0	0	0	0	0	0	0	0	0	0	0
93	E	GAA	0.000782812	0	0	0.000143274	0	0	0	0	0	0.000440202	0.00203905		0.00308972	0	0	0.0021898	0	0	0	0	0	0	0	0	0.000942696	0	0	0	0	0	0	0	0	0	0	0	0	0	0	0.000129569	0	0	0	0	0	0	0
94	Y	TAT	0.00126562	0	0	0	0	0	0	0	0.0014833	0	0	0	0	0	0.00111741	0	0	0	0	0	0.00117762	0	0	0	0	0	0	0	0	0	0	0	0	0	0.0016454	0	0	0	0	0	0	0	0	0	0	0	0
95	I	ATT	0	0	0	0	0	0	0	0	0	0	0	0	0	0	0.0016653	0	0	0	0	0	0	0.00155459	0.00164224		0	0	0	0	0	4.15267e-05	0	0	0.000115335	0	0.00271706	0	0	0	0	0	0	0	0	0	0	0	0
96	R	CGG	0	0	0	0	0	0	0	0	0	0	0	0	0	0	0	0	0	0.000455603	0	0	0	0	0	0	0	0	0	0	0.00141033	0	0	0	0	0	0	0	0	0.0003212	0	0	0.00223528	0	0.00201746	0.00130373	0.000441699		0.000733678
97	I	ATT	0	0	0	0	0	0	0	0	0	0	0	0	0	0	0.00185913	0	0	0	0	0	0	0.00135003	0.00181199		0	0	0	0	0	6.31348e-05	0	0	0.000850355	0	0.00426793	0	0	0	0	0	0	0	0	0	0	0	0
98	L	TTA	0.00290055	0	0	0	0	0	0	0	0	0	0	0	0	0	0.00189928	0	0	0	0	0	0	0.00231991	0	0	0	0	0.00218275	0	0	0		0.000994033	0	0	0	0	0	0	0	0	0	0	0	0	0	0	0
99	K	AAA	0.00212939	0	0	0	0	0	0	0	0	0	0	0.00230422	0	0	0	0	0	0	0	0	0	0.00180734	0	0		0.00236864	0	0	0	0	0	0	0	0.000887174	0.0021478	0	0	0	0	0.000445497	0	0.00135186	0	0	0	0	0
100	Q	CAA	0.0017966	0	0	0	0	0	0	0	0	0	0	0.000599283	0	0	0	0	0	0	0	0.000151983	0.00123183	0	0	0	0.0027409	0	0.00160684	0	0	0	0	0	0	0	0	4.3547e-05	0	0	0		0.00155262	0	0	0.00219872	0	0	0
101	K	AAA	0.00109543	0	0	0	0	0	0	0	0	0	0	0.00178634	0	0	0	0	0	0	0	0	0	0.00224844	0	0		0.00141846	0	0	0	0	0	0	0	0.000633336	0.00118068	0	0	0	0	0.000637822	0	0.00152613	0	0	0	0	0
102	K	AAA	0.00181345	0	0	0	0	0	0	0	0	0	0	0.00162672	0	0	0	0	0	0	0	0	0	0.000902554	0	0		0.00143998	0	0	0	0	0	0	0	0.0015584	0.000693047	0	0	0	0	0.000324132	0	0.00106652	0	0	0	0	0
103	P	CCA	0	0	0	0.000211709	0	0	0	0	0	0	0	0	0	0	0	0	0	0	0	0	0	0	0	0	0	0	0.00139922	0	0	0	0	0	0	0	0		0.000686714	0.00207976	0.00164129	0.00111148	0	0	0	6.55538e-05	0	0	0
104	K	AAA	0.0023247	0	0	0	0	0	0	0	0	0	0	0.00192747	0	0	0	0	0	0	0	0	0	0.0013269	0	0		0.000787811	0	0	0	0	0	0	0	0.000565553	0.00172886	0	0	0	0	0.000385855	0	0.000882388	0	0	0	0	0
105	F	TTC	0	0	0	0	0	0	0	4.9344e-05	0	0	0	0	0		0.00107775	0	0	0	0	0	0	0	0.00210615	0	0	0	0	0.00156086	0	0	0.00135996	0.000145009	0	0	0	0	0	0	0	0	0	0	0	0	0	0	0
106	F	TTT	0	0	0	0	0	0	0	0	0.000421846	0	0	0	0	0.0016388		0	0	0	0	0	0	0	0	0.00154918	0	0	0	0	0	0.00226614	0.00121428	9.63823e-05	0	0	0	0	0	0	0	0	0	0	0	0	0	0	0
107	L	CTT	0	0	0	0	0	0	0	0	0	0	0	0	0	0	0.00060258	0	0	0	0	0	0.00315711	0	0	0.00133377	0	0	0.00123196	0.00242592	0.000149059		0	0	0	0	0	0	0	0	0.00264805	0	0	0	0	0	0	0	0.000852479
108	A	GCC	0	0	0	0.00146871		6.02546e-05	0.00217521	0	0	0.0006209	0	0	0	0	0	0	0.000538854	0	0	0	0	0	0	0	0	0	0	0	0	0	0	0	0	0	0	0	0.00040667	0	0	0	0	0	0	0	0	0	0
109	E	GAA	0.00110233	0	0	3.93997e-05	0	0	0	0	0	0.000867132	0.000989256		0.00181699	0	0	0.0011747	0	0	0	0	0	0	0	0	0.00219241	0	0	0	0	0	0	0	0	0	0	0	0	0	0	0	0	0	0	0	0	0	0
110	N	AAC	0	0	0	0	0	0	0	0	0	0.00236868	0	0	0	0	0	0	0	0	0	0.000392996	0	0	0.000875742	0	0.000960669	0.00059414	0	0	0	0	0	0	0		0.00209602	0	0	0	0	0	0	0	0	0	0	0	0
111	V	GTT	0	0	0	0	0	0	0.0019508	0	0	0	0.00106029	0	0	0	0.00056409	0	0	0	0.000422318	0	0	0	0	0.0027527	0	0	0	0	0	0.000776749	0	0	0	0	0	0	0	0	0	0	0	0	0	0	0	0	0
112	K	AAA	0.000963461	0	0	0	0	0	0	0	0	0	0	0.00132566	0	0	0	0	0	0	0	0	0	0.0018778	0	0		0.00192198	0	0	0	0	0	0	0	0.000552669	0.00163928	0	0	0	0	0	0	0.00226651	0	0	0	0	0
113	G	GGA	0	0	0.00249286	0.000331058	0	0	0	0	0	0	0	0.00143402	0	0	0		0.00011929	0.00191491	0.00143402	0	0	0	0	0	0	0	0	0	0	0	0	0	0	0	0	0	0	0	0	0	0	0.00100607	0	3.10529e-05	0	0	0
114	M	ATG	0	0	0	0	0	0	0	0	0	0	0	0	0	0	0	0	0	0	0	0	0	0.00422142	0.000428687	0.00039778	0	0.00105124	0	0	0.000300644	0	0	0.00119695		0	0	0	0	0	0	0	0	0	4.89727e-05	0	0	0	0
115	L	CTG	0	0	0	0	0	0	0	0	0	0	0	0	0	0	0	0	0	0	0	0	0	0	0	0	0	0	0.00189543	8.49926e-05		0.000474193	0	0.00388954	0.00140565	0	0	0	0	0.00249454	0	0	0.00142314	0	0	0	0	0.000364867	0
116	A	GCT	0	0	0	0.000934874	0.00144458	0.000359263		0	0	0	0.00163352	0	0	0	0	0	0	0	0.00052184	0	0	0	0	0	0	0	0	0	0	0	0	0	0	0	0	0	0	0	0.000398808	0	0	0	0	0	0	0	0
117	Q	CAG	0	0.00195641	0	0	0	0	0	0	0	0	0	0	0	0	0	0	0	0	0	9.008e-05	0.00143069	0	0	0	0	0.00041866	0	0	0.0017505	0	0	0	0	0	0	0	0	0.000208369	0	0.00219737		0	0	0	0	0.00201337	0
118	R	CGT	0	0	0	0	0	0	0	0	0.00437292	0	0	0	0	0	0	0	0	0	0.000693515	0	0.00408783	0	0	0	0	0	0	0	0	0.00107215	0	0	0	0	0	0	0	0	0.00105433	0	0	0	0	0.000951875	0.00210113	0.000310429
119	H	CAT	0	0	0	0	0	0	0	0	0	0	7.56094e-05	0	0	0	0	0	0	0	0	0.00185897		0	0	0	0	0	0	0	0	0.00234168	0	0	0	0	0.000468932	0	0	0	5.32615e-05	0.000670063	0	0	0	0	0	0	0.00185003
120	N	AAT	0	0	0	0	0	0	0	0	0	0	0.00163982	0	0	0	0	0	0	0	0	0	0	0	0	0.00314295	0.00204036	2.41918e-05	0	0	0	0	0	0	0	0.00141481		0	0	0	0	0	0	0	0	0	0	0	0
121	K	AAG	0	0.000775551	0	0	0	0	0	0	0	0	0	0	0.00127921	0	0	0	0	0	0	0	0	0	0	0	0.00123384		0	0	0	0	0	0	0.00314866	0.000226514	0.0018101	0	0	0	0	0	0.000172065	0	0.00224116	0	0	0	0
122	A	GCT	0	0	0	0.000832637	0.00210724	0.00042458		0	0	0	0.00155247	0	0	0	0	0	0	0	0.000296203	0	0	0	0	0	0	0	0	0	0	0	0	0	0	0	0	0	0	0	0.000323712	0	0	0	0	0	0	0	0
123	V	GTT	0	0	0	0	0	0	0.00414991	0	0	0	0.00283971	0	0	0	0.000688998	0	0	0.000116628	0.00454544	0	0	0	0	0.00484209	0	0	0	0	0	0.0014986	0	0	0	0	0	0	0	0	0	0	0	0	0	0	0	0	0
124	Q	CAA	0.00173419	0	0	0	0	0	0	0	0	0	0	5.64072e-05	0	0	0	0	0	0	0	0.000240274	0.00169972	0	0	0	0.000671212	0	0.00118259	0	0	0	0	0	0	0	0	0.000280495	0	0	0		0.00250413	0	0	0.00303275	0	0	0
125	E	GAA	0.00185925	0	0	0.000120124	0	0	0	0	0	0.000500557	0.00206675		0.00204699	0	0	0.00122684	0	0	0	0	0	0	0	0	0.00138	0	0	0	0	0	0	0	0	0	0	0	0	0	0	0.000248582	0	0	0	0	0	0	0
126	F	TTT	0	0	0	0	0	0	0	0	0.000498049	0	0	0	0	0.00147817		0	0	0	0	0	0	0	0	0.00150772	0	0	0	0	0	0.00165055	0.000468498	0	0	0	0	0	0	0	0	0	0	0	0	0	0	0	0
127	I	ATC	0	0	0	0	0	0	0	0	0	0	0	0	0	0.000655198	0	0	0	0	0	0	0	0.000634986		0.00207006	0	0	0	1.34564e-05	0	0	0	0	8.92526e-05	0.00181235	0	0	0	0	0	0	0	0	0	0	0	0	0
128	Q	CAA	0.00158377	0	0	0	0	0	0	0	0	0	0	0.000736646	0	0	0	0	0	0	0	0.000422712	0.00176814	0	0	0	0.000407763	0	0.0013994	0	0	0	0	0	0	0	0	0.000362915	0	0	0		0.00255547	0	0	0.00279964	0	0	0
129	E	GAA	0.00210697	0	0	4.1988e-05	0	0	0	0	0	0.000379128	0.00283276		0.00173237	0	0	0.00217721	0	0	0	0	0	0	0	0	0.00115174	0	0	0	0	0	0	0	0	0	0	0	0	0	0	0	0	0	0	0	0	0	0
130	F	TTT	0	0	0	0	0	0	0	0	0.000565874	0	0	0	0	0.00203341		0	0	0	0	0	0	0	0	0.00136214	0	0	0	0	0	0.00128344	0.00172787	0.000394584	0	0	0	0	0	0	0	0	0	0	0	0	0	0	0
131	D	GAT	0	0	0	0	0	0	9.24393e-05	0	0	0.0017596		0.00228264	0.000111119	0	0	0	0	0	0.00163352	0	0.000274567	0	0	0	0	0	0	0	0	0	0	0	0	0	0.00117586	0	0	0	0	0	0	0	0	0	0	0	0
132	N	AAT	0	0	0	0	0	0	0	0	0	0	0.00182809	0	0	0	0	0	0	0	0	0	0	0	0	0.00316316	0.00167316	8.29177e-05	0	0	0	0	0	0	0	0.00150457		0	0	0	0	0	0	0	0	0	0	0	0
133	A	GCT	0	0	0	0.00129159	0.00225193	0.000262652		0	0	0	0.00148823	0	0	0	0	0	0	0	0.000916599	0	0	0	0	0	0	0	0	0	0	0	0	0	0	0	0	0	0	0	0.00103093	0	0	0	0	0	0	0	0
134	G	GGA	0	0	0.0011182	0.000302034	0	0	0	0	0	0	0	0.00209852	0	0	0		0	0.00193437	0.00310163	0	0	0	0	0	0	0	0	0	0	0	0	0	0	0	0	0	0	0	0	0	0	0.00190246	0	0.000270117	0	0	0
135	Y	TAT	0.0017	0.000297338	0	0	0	0	0	0	0.00145928	0	6.12463e-05	0	0	0	0.000862105	0	0	0	0	0	0.00107968	0	0	0	0	0	0	0	0	0	0	0	0	0	0.000751004	0	0	0	0	0	0	0	0	0	0	0	0
136	D	GAT	0	0	0	0	0	0	6.77032e-05	0	0	0.00188654		0.00166979	0.000383409	0	0	0	0	0	0.0026122	0	0.000161944	0	0	0	0	0	0	0	0	0	0	0	0	0	0.00218811	0	0	0	0	0	0	0	0	0	0	0	0
137	V	GTC	0	0	0	0	0.00274233	0	0	0	0	0.00173798	0	0	0	0.000292102	0	0	0.000253287	0	0	0	0	0	0.00236388	0	0	0	0	0.00046192	0	0	0	0	0	0	0	0	0	0	0	0	0	0	0	0	0	0	0
138	H	CAT	0	0	0	0	0	0	0	0	0	0	0.000126047	0	0	0	0	0	0	0	0	0.00134078		0	0	0	0	0	0	0	0	0.00345083	0	0	0	0	0.00124883	0	0	0	9.21703e-05	0.0012827	0	0	0	0	0	0	0.00216351
139	I	ATT	0	0	0	0	0	0	0	0	0	0	0	0	0	0	0.000933626	0	0	0	0	0	0	0.000402214	0.00128953		0	0	0	0	0	0	0	0	0	0	0.00222559	0	0	0	0	0	0	0	0	0	0	0	0
140	I	ATT	0	0	0	0	0	0	0	0	0	0	0	0	0	0	0.00137963	0	0	0	0	0	0	0.00172525	0.00163763		0	0	0	0	0	0.00012855	0	0	0.000853882	0	0.00288384	0	0	0	0	0	0	0	0	0	0	0	0
141	L	TTG	0	0.000971333	0	0	0	0	0	0	0	0	0	0	0	0.000424435	0.000463851	0	0	0	0	0	0	0	0	0	0	0	0	0	0.00217352	0	0.00230162		0.00266622	0	0	0	0	0	0	0	8.80042e-06	0	0	0	0	0	0
142	L	CTT	0	0	0	0	0	0	0	0	0	0	0	0	0	0	0.0028443	0	0	0	0	0	0.00147959	0	0	0.00096843	0	0	0.000698381	0.00148924	1.84369e-05		0	0	0	0	0	0	0	0	0.00201969	0	0	0	0	0	0	0	0.00059229
143	N	AAT	0	0	0	0	0	0	0	0	0	0	0.00122028	0	0	0	0	0	0	0	0	0	0	0	0	0.00160626	0.00173016	0.000181455	0	0	0	0	0	0	0	0.00151096		0	0	0	0	0	0	0	0	0	0	0	0
144	A	GCG	0	0	0	0.00222553	0.000285136		0.00160251	0	0	0	0	0	0.000727431	0	0	0	0	0.000484882	0	0	0	0	0	0	0	0	0	0	0	0	0	0	0	0	0	0	0	0	0	0	0	0	0	0	0	0	0
145	N	AAT	0	0	0	0	0	0	0	0	0	0	0.00189335	0	0	0	0	0	0	0	0	0	0.000310986	0	0	0.00180678	0.00105648	0.000104173	0	0	0	0	0	0	0	0.00143644		0	0	0	0	0	0	0	0	0	0	0	0
146	D	GAT	0	0	0	0	0	0	1.61072e-05	0	0	0.0020916		0.00272835	0.00063827	0	0	0	0	0	0.00219854	0	0.000200812	0	0	0	0	0	0	0	0	0	0	0	0	0	0.00125071	0	0	0	0	0	0	0	0	0	0	0	0
147	Y	TAT	0.00130591	4.25303e-05	0	0	0	0	0	0	0.00235229	0	0	0	0	0	0.00158076	0	0	0	0	0	0.00161934	0	0	0	0	0	0	0	0	0	0	0	0	0	0.000635641	0	0	0	0	0	0	0	0	0	0	0	0
148	G	GGT	0	0	0	0	0	0	0.000972978	0	0.00107089	0	0.00464455	0	0	0	0	0.00167302	0.00273044	0.000635193		0	0	0	0	0	0	0	0	0	0	0	0	0	0	0	0	0	0	0	0	0	0	0	0	0	0	0	0.000576448
149	V	GTA	0	0	0	0.00204379	0	0	0	0	0	0	0	0.00114466	0	0	0	0.000142358	0	0	0	0	0	0.00283974	0	0	0	0	0.00070247	0	0	0	0.000289756	0	0	0	0	0	0	0	0	1.34799e-05	0	0	0	0	0	0	0
150	A	GCT	0	0	0	0.00116748	0.00227046	0.00012938		0	0	0	0.00121739	0	0	0	0	0	0	0	0.000299069	0	0	0	0	0	0	0	0	0	0	0	0	0	0	0	0	0	0	0	0.000458777	0	0	0	0	0	0	0	0
151	Q	CAA	0.00170727	0	0	0	0	0	0	0	0	0	0	0	0	0	0	0	0	0	0	0.000426788	0.00277942	0	0	0	0.000421706	0	0.00126012	0	0	0	0	0	0	0	0	0.000121911	0	0	0		0.00239324	0	0	0.00162089	0	0	0
152	D	GAT	0	0	0	0	0	0	4.82289e-06	0	0	0.000965269		0.00128025	4.82289e-06	0	0	0	0	0	0.00232848	0	0.000381772	0	0	0	0	0	0	0	0	0	0	0	0	0	0.00121313	0	0	0	0	0	0	0	0	0	0	0	0
153	R	AGA	0	0	0.00053048	0	0	0	0	0	0	0	0	0	0	0	0	0.00199543	0	0	0	0	0	0.00231275	0	0	0.00133964	0	0	0	0	0	0	0	0	0	0	0	0	0	0	0	0		0.0016358	6.9056e-06	0	0	0
154	K	AAA	0.00211306	0	0	0	0	0	0	0	0	0	0	0.00233341	0	0	0	0	0	0	0	0	0	0.00166133	0	0		0.00208	0	0	0	0	0	0	0	0.000691764	0.00100577	0	0	0	0	0.000868048	0	0.00234994	0	0	0	0	0
155	R	CGT	0	0	0	0	0	0	0	0	0.00263449	0	0	0	0	0	0	0	0	0	0.000310327	0	0.00403786	0	0	0	0	0	0	0	0	0.00028814	0	0	0	0	0	0	0	0	0.000482282	0	0	0	0	0.000604314	0.00138643	0.000315874
156	V	GTT	0	0	0	0	0	0	0.00182674	0	0	0	0.00121026	0	0	0	0.000361893	0	0	0	0.00111977	0	0	0	0	0.000803044	0	0	0	0	0	0.00016394	0	0	0	0	0	0	0	0	0	0	0	0	0	0	0	0	0
157	F	TTT	0	0	0	0	0	0	0	0	0.000983001	0	0	0	0	0.00177603		0	0	0	0	0	0	0	0	0.00193347	0	0	0	0	0	0.00133287	0.00198595	0.000493191	0	0	0	0	0	0	0	0	0	0	0	0	0	0	0
158	Y	TAT	0.00184231	0.000237178	0	0	0	0	0	0	0.00111646	0	0	0	0	0	0.00106335	0	0	0	0	0	0.00106335	0	0	0	0	0	0	0	0	0	0	0	0	0	5.42395e-05	0	0	0	0	0	0	0	0	0	0	0	0
159	I	ATT	0	0	0	0	0	0	0	0	0	0	0	0	0	0	0.00159395	0	0	0	0	0	0	0.00127531	0.00155186		0	0	0	0	0	0.000114993	0	0	9.69572e-05	0	0.00326528	0	0	0	0	0	0	0	0	0	0	0	0
160	G	GGT	0	0	0	0	0	0	0.000713736	0	0.00024449	0	0.00234045	0	0	0	0	0.000913947	0.00268457	0.000501011		0	0	0	0	0	0	0	0	0	0	0	0	0	0	0	0	0	0	0	0	0	0	0	0	0	0	0	0.000106845
161	F	TTT	0	0	0	0	0	0	0	0	0.000512825	0	0	0	0	0.000947504		0	0	0	0	0	0	0	0	0.00186726	0	0	0	0	0	0.00133808	0.00041203	4.03484e-05	0	0	0	0	0	0	0	0	0	0	0	0	0	0	0
162	R	AGA	0	0	0.0010037	0	0	0	0	0	0	0	0	0	0	0	0	0.00112393	0	0	0	0	0	0.00113026	0	0	0.000668324	0	0	0	0	0	0	0	0	0	0	0	0	0	0	0	0		0.00189592	7.35074e-05	0	0	0
163	K	AAA	0.00215816	0	0	0	0	0	0	0	0	0	0	0.00292628	0	0	0	0	0	0	0	0	0	0.00208775	0	0		0.00721497	0	0	0	0	0	0	0	0.000513095	0.00196613	0	0	0	0	0.0011596	0	0.00247181	0	0	0	0	0
164	E	GAG	0	0.000497339	0	0	0	8.25496e-05	0	0	0	0.000374199	0.000568631	0.000750102		0	0	0	0	0.00224075	0	0	0	0	0	0	0	0.00161209	0	0	0	0	0	0	0	0	0	0	0	0	0	0	0	0	0	0	0	0	0
165	L	TTA	0.000387536	0	0	0	0	0	0	0	0	0	0	0	0	4.05774e-05	0.001088	0	0	0	0	0	0	0.00061666	0	0	0	0	0.00141532	0	0	0		0.00155279	0	0	0	0	0	0	0	0	0	0	0	0	0	0	0
166	N	AAT	0	0	0	0	0	0	0	0	0	0	0.00209031	0	0	0	0	0	0	0	0	0	0.000143765	0	0	0.00211017	0.000713162	0	0	0	0	0	0	0	0	0.00117662		0	0	0	0	0	0	0	0	0	0	0	0
167	I	ATA	0	0	0	0	0	0	0	0	0	0	0	0	0	0	0	0	0	0	0	0	0		9.66419e-05	0.000202369	0.00145127	0	0	0	0	0	0.000975498	0	0.00126625	0	0	0	0	0	0	0	0	4.13067e-06	0	0	0	0	0
168	N	AAT	0	0	0	0	0	0	0	0	0	0	0.00166212	0	0	0	0	0	0	0	0	0	0.000627018	0	0	0.000525538	0.0025822	0.000207567	0	0	0	0	0	0	0	0.00205451		0	0	0	0	0	0	0	0	0	0	0	0
169	Y	TAT	0.000552703	8.7086e-05	0	0	0	0	0	0	0.000972413	0	0	0	0	0	0.000526471	0	0	0	0	0	0.00121506	0	0	0	0	0	0	0	0	0	0	0	0	0	0.000539587	0	0	0	0	0	0	0	0	0	0	0	0
170	L	CTT	0	0	0	0	0	0	0	0	0	0	0	0	0	0	0.000983593	0	0	0	0	0	0.00215901	0	0	0.00051978	0	0	0.00131398	0.00174603	4.96134e-05		0	0	0	0	0	0	0	0	0.00334713	0	0	0	0	0	0	0	0.000570609
171	P	CCA	0	0	0	0.00025861	0	0	0	0	0	0	0	0	0	0	0	0	0	0	0	0	0	0	0	0	0	0	0.00176641	0	0	0	0	0	0	0	0		0.000475782	0.00260408	0.000910128	0.00106525	0	0	0	7.86664e-05	0	0	0
172	P	CCC	0	0	0	0	0.00112705	0	0	0	0	0	0	0	0	0	0	0	0	0	0	0.00172257	0	0	0	0	0	0	0	0.00233578	0	0	0	0	0	0	0	0.000696628		0.00044309	0.00189356	0	0	0	0	0	0.000938373	0	0
173	I	ATT	0	0	0	0	0	0	0	0	0	0	0	0	0	0	0.00183025	0	0	0	0	0	0	0.00116859	0.00210884		0	0	0	0	0	0.000414061	0	0	0.000222528	0	0.00198115	0	0	0	0	0	0	0	0	0	0	0	0
174	P	CCA	0	0	0	0.000180379	0	0	0	0	0	0	0	0	0	0	0	0	0	0	0	0	0	0	0	0	0	0	0.00131231	0	0	0	0	0	0	0	0		0.000426203	0.00234706	0.00136376	0.000866399	0	0	0	8.89099e-05	0	0	0
175	H	CAT	0	0	0	0	0	0	0	0	0	0	0.000804573	0	0	0	0	0	0	0	0	0.00171474		0	0	0	0	0	0	0	0	0.00230302	0	0	0	0	0.000299543	0	0	0	0.000416088	0.00198668	0.00063808	0	0	0	0	0	0.00251391
176	L	TTG	0	0.00155446	0	0	0	0	0	0	0	0	0	0	0	0.000128496	0.00013934	0	0	0	0	0	0	0	0	0	0	0	0	0	0.00215087	0	0.00169		0.00175507	0	0	0	0	0	0	0	0	0	0	0	0	0	0
177	I	ATA	0	0	0	0	0	0	0	0	0	0	0	0	0	0	0	0	0	0	0	0	0		0.000260437	0.000302721	0.00157655	0	3.31568e-05	0	0	0	0.0011537	0	0.00159769	0	0	0	0	0	0	0	0	0	0	0	0	0	0
178	K	AAG	0	0.00295874	0	0	0	0	0	0	0	0	0	0	0.0020667	0	0	0	0	0	0	0	0	0	0	0	0.00254945		0	0	0	0	0	0	0.00159444	0.000628938	0.00179384	0	0	0	0	0	0.0010907	0	0.002455	0	0	0	0
179	P	CCA	0	0	0	0.00063205	0	0	0	0	0	0	0	0	0	0	0	0	0	0	0	0	0	0	0	0	0	0	0.00171324	0	0	0	0	0	0	0	0		5.02656e-05	0.00203245	0.00091522	0.000328287	0	0	0	0.000204722	0	0	0
180	T	ACA	0	0	0	0.00210239	0	0	0	0	0	0	0	0	0	0	0	0	0	0	0	0	0	0.00303345	0	0	0.00029172	0	0	0	0	0	0	0	0	0	0	0.000430607	0	0	0	0	0	0.000595213	0	0	0	0	0
181	L	TTG	0	0.000870076	0	0	0	0	0	0	0	0	0	0	0	3.74369e-05	0.000569694	0	0	0	0	0	0	0	0	0	0	0	0	0	0.00229294	0	0.00134436		0.00263548	0	0	0	0	0	0	0	0	0	0	0	0	0	0
182	K	AAG	0	0.00136303	0	0	0	0	0	0	0	0	0	0	0.00267072	0	0	0	0	0	0	0	0	0	0	0	0.00102938		0	0	0	0	0	0	0.00166977	0.000114536	0.00260076	0	0	0	0	0	1.767e-05	0	0.00222944	0	0	0	0
183	D	GAC	0	0	0	0	0.000139738	0	0	0	0		0.00392766	0.000313396	0.000872358	0	0	0	0.0021965	0	0	8.54694e-05	0	0	0	0	0	0	0	0	0	0	0	0	0	0.000997175	0	0	0	0	0	0	0	0	0	0	0	0	0
184	V	GTC	0	0	0	0	0.00206281	0	0	0	0	0.00109407	0	0	0	0.000588174	0	0	0.000265262	0	0	0	0	0	0.00316071	0	0	0	0	0.000803449	0	0	0	0	0	0	0	0	0	0	0	0	0	0	0	0	0	0	0
185	I	ATT	0	0	0	0	0	0	0	0	0	0	0	0	0	0	0.00180495	0	0	0	0	0	0	0.00236083	0.00201543		0	0	0	0	0	2.39785e-05	0	0	0.000741764	0	0.000795733	0	0	0	0	0	0	0	0	0	0	0	0
186	W	TGG	0	0.00100699	0.0016179	0	0	0	0	0.000215457	0.00152759	0	0	0	0	0	0	0	0	0.000597941	0	0	0	0	0	0	0	0	0	0	0	0	0	0.000475758	0	0	0	0	0	0	0	0	0	0	0.0028291	0	0	0.00263786	0
187	D	GAT	0	0	0	0	0	0	8.65722e-05	0	0	0.00161103		0.00247912	5.48127e-05	0	0	0	0	0	0.00276495	0	0.00022949	0	0	0	0	0	0	0	0	0	0	0	0	0	0.00169043	0	0	0	0	0	0	0	0	0	0	0	0
188	L	CTT	0	0	0	0	0	0	0	0	0	0	0	0	0	0	0.00167565	0	0	0	0	0	0.00213857	0	0	0.00132577	0	0	0.000227679	0.000948974	0.000109258		0	0	0	0	0	0	0	0	0.00175639	0	0	0	0	0	0	0	0.0006906
189	K	AAG	0	0.00089687	0	0	0	0	0	0	0	0	0	0	0.000977366	0	0	0	0	0	0	0	0	0	0	0	0.00140668		0	0	0	0	0	0	0.00217407	0.000558788	0.00274827	0	0	0	0	0	6.831e-07	0	0.00124032	0	0	0	0
190	D	GAT	0	0	0	0	0	0	0	0	0	0.000936724		0.00131259	4.33511e-05	0	0	0	0	0	0.00210247	0	0	0	0	0	0	0	0	0	0	0	0	0	0	0	0.000893145	0	0	0	0	0	0	0	0	0	0	0	0
191	N	AAT	0	0	0	0	0	0	0	0	0	0	0.00189216	0	0	0	0	0	0	0	0	0	0	0	0	0.00231839	0.00213572	9.31752e-05	0	0	0	0	0	0	0	0.00186449		0	0	0	0	0	0	0	0	0	0	0	0
192	P	CCA	0	0	0	0.000674456	0	0	0	0	0	0	0	0	0	0	0	0	0	0	0	0	0	0	0	0	0	0	0.00171633	0	0	0	0	0	0	0	0		0.000207022	0.00205986	0.0012151	0.000809618	0	0	0	0.000635034	0	0	0
193	I	ATT	0	0	0	0	0	0	0	0	0	0	0	0	0	0	0.00177472	0	0	0	0	0	0	0.00151322	0.00244881		0	0	0	0	0	0.000292896	0	0	0.000130185	0	0.00247205	0	0	0	0	0	0	0	0	0	0	0	0
194	P	CCA	0	0	0	0.000181135	0	0	0	0	0	0	0	0	0	0	0	0	0	0	0	0	0	0	0	0	0	0	0.00149656	0	0	0	0	0	0	0	0		0.000244878	0.00208763	0.000870718	0.000911282	0	0	0	0.0003318	0	0	0
195	A	GCT	0	0	0	0.00141962	0.00172623	0.000638049		0	0	0	0.000734242	0	0	0	0	0	0	0	0.000800374	0	0	0	0	0	0	0	0	0	0	0	0	0	0	0	0	0	0	0	0.000433638	0	0	0	0	0	0	0	0
196	L	TTA	7.58365e-05	0	6.35194e-05	0	0	0	0	0	0	0	0	0	0	3.88853e-05	0.000913399	0	0	0	0	0	0	0.00173249	0	0	0	0	0.00194188	0	0	0		0.00129523	0	0	0	0	0	0	0	0	0	0	0	0	0	0	0
197	D	GAT	0	0	0	0	0	0	0	0	0	0.000641767		0.00149369	0	0	0	0	0	0	0.00186521	0	0.000174169	0	0	0	0	0	0	0	0	0	0	0	0	0	0.000776281	0	0	0	0	0	0	0	0	0	0	0	0
198	K	AAA	0.000679157	0	0	0	0	0	0	0	0	0	0	0.00114881	0	0	0	0	0	0	0	0	0	0.00210134	0	0		0.00160523	0	0	0	0	0	0	0	0.000930519	0.00173753	0	0	0	0	0.000202891	0	0.00173091	0	0	0	0	0
199	N	AAT	0	0	0	0	0	0	0	0	0	0	0.00153315	0	0	0	0	0	0	0	0	0	0.000224849	0	0	0.00107661	0.000681392	4.76832e-05	0	0	0	0	0	0	0	0.000817674		0	0	0	0	0	0	0	0	0	0	0	0
200	K	AAA	9.03173e-05	0	0	0	0	0	0	0	0	0	0	0.000978249	0	0	0	0	0	0	0	0	0	0.00231015	0	0		0.00150966	0	0	0	0	0	0	0	0.000191219	0.000386295	0	0	0	0	2.30497e-05	0	0.00152984	0	0	0	0	0
201	T	ACA	0	0	0	0.00197211	0	0	0	0	0	0	0	0	0	0	0	0	0	0	0	0	0	0.000961601	0	0	7.99524e-05	0	0	0	0	0	0	0	0	0	0	0.000615724	0	0	0	0	0	0.00039192	0	0	0	0	0
202	N	AAT	0	0	0	0	0	0	0	0	0	0	0.00185672	0	0	0	0	0	0	0	0	0	0.000883887	0	0	0.00104036	0.00219006	0.000217193	0	0	0	0	0	0	0	0.00180229		0	0	0	0	0	0	0	0	0	0	0	0
203	G	GGT	0	0	0	0	0	0	0.000627255	0	0.000737132	0	0.00188398	0	0	0	0	0.000840142	0.00161615	0.000476174		0	0	0	0	0	0	0	0	0	0	0	0	0	0	0	0	0	0	0	0	0	0	0	0	0	0	0	0.000242684
204	N	AAT	0	0	0	0	0	0	0	0	0	0	0.00134206	0	0	0	0	0	0	0	0	0	0	0	0	0.00169197	0.000514382	0	0	0	0	0	0	0	0	0.000871023		0	0	0	0	0	0	0	0	0	0	0	0
205	K	AAA	0.00061916	0	0	0	0	0	0	0	0	0	0	0.000978767	0	0	0	0	0	0	0	0	0	0.00167134	0	0		0.00141829	0	0	0	0	0	0	0	0.000386082	0.0013184	0	0	0	0	0	0	0.00219743	0	0	0	0	0
206	C	TGT	0	0	0.000671458	0	0	0	0	0.00143365		0	0	0	0	0	0.000226282	0	0	0	0.000192557	0	0	0	0	0	0	0	0	0	0	0	0	0	0	0	0	0	0	0	0	0	0	0	0	0	0	0	0.00169671
207	I	ATT	0	0	0	0	0	0	0	0	0	0	0	0	0	0	0.00146875	0	0	0	0	0	0	0.00149505	0.00160682		0	0	0	0	0	0	0	0	0.000449677	0	0.00132411	0	0	0	0	0	0	0	0	0	0	0	0
208	Y	TAT	0.00169975	0.000150864	0	0	0	0	0	0	0.000734869	0	4.29506e-05	0	0	0	0.000645999	0	0	0	0	0	0.00180131	0	0	0	0	0	0	0	0	0	0	0	0	0	0.000398432	0	0	0	0	0	0	0	0	0	0	0	0
209	P	CCT	0	0	0	0	0	0	3.29173e-05	0	0	0	0	0	0	0	0	0	0	0	0	0	0.00265796	0	0	0	0	0	0	0	0	0.00162273	0	0	0	0	0	0.00103734	0.00137625	0.000230104		0	0	0	0	0	0	0	0.000384156
210	N	AAT	0	0	0	0	0	0	0	0	0	0	0.00156137	0	0	0	0	0	0	0	0	0	4.46094e-05	0	0	0.00177287	0.00167619	6.27381e-05	0	0	0	0	0	0	0	0.00226839		0	0	0	0	0	0	0	0	0	0	0	0
211	H	CAC	0	0	0	0	0	0	0	0	0	9.05228e-05	0	0	0	0	0	0	0	0	0		0.00232457	0	0	0	0	0	0	0.000889254	0	0	0	0	0	0.000102534	0	0	0.00024066	0	0	0.000366776	0.000318732	0	0	0	0.00230655	0	0
212	E	GAA	0.0011348	0	0	0.000132356	0	0	0	0	0	0.000348452	0.001585		0.00156699	0	0	0.0013629	0	0	0	0	0	0	0	0	0.00162101	0	0	0	0	0	0	0	0	0	0	0	0	0	0	1.83059e-05	0	0	0	0	0	0	0
213	Y	TAT	0.00225237	0.000159805	0	0	0	0	0	0	0.000800881	0	0	0	0	0	0.000704115	0	0	0	0	0	0.00111537	0	0	0	0	0	0	0	0	0	0	0	0	0	0.00107304	0	0	0	0	0	0	0	0	0	0	0	0
214	F	TTT	0	0	0	0	0	0	0	0	0.000676019	0	0	0	0	0.00121155		0	0	0	0	0	0	0	0	0.000979485	0	0	0	0	0	0.00136031	0.000223794	0	0	0	0	0	0	0	0	0	0	0	0	0	0	0	0
215	I	ATA	0	0	0	0	0	0	0	0	0	0	0	0	0	0	0	0	0	0	0	0	0		5.96295e-05	0.000843379	0.0014032	0	0	0	0	0	0.00202784	0	0.00125588	0	0	0	0	0	0	0	0	0	0	0	0	0	0
216	G	GGA	0	0	0.00369974	0.000178696	0	0	0	0	0	0	0	0.00224642	0	0	0		0.00024959	0.00193331	0.0048104	0	0	0	0	0	0	0	0	0	0	0	0	0	0	0	0	0	0	0	0	0	0	0.00186832	0	0.000231866	0	0	0
217	S	TCA	0.000471966	0	0	0.000160942	0	0	0	0	0	0	0	0	0	0	0	0	0	0	0	0	0	0	0	0	0	0	0	0	0	0	0.00152023	0	0	0	0	0.00233811	0	0	0	0	0	0	0	0	0	0	0
218	Y	TAT	0.00302484	0.000380985	0	0	0	0	0	0	0.00115258	0	0	0	0	0	0.00100507	0	0	0	0	0	0.00158377	0	0	0	0	0	0	0	0	0	0	0	0	0	0.00064764	0	0	0	0	0	0	0	0	0	0	0	0
219	S	TCA	0.0007306	0	0.000364598	0.000178782	0	0	0	0	0	0	0	0	0	0	0	0	0	0	0	0	0	0	0	0	0	0	0	0	0	0	0.00176103	0	0	0	0	0.00168783	0	0	0	0	0	0	0	0	0	0	0
220	T	ACA	0	0	0	0.00200752	0	0	0	0	0	0	0	0	0	0	0	0	0	0	0	0	0	0.00240062	0	0	0.000315459	0	0	0	0	0	0	0	0	0	0	0.000355339	0	0	0	0	0	0.000566134	0	0	0	0	0
221	I	ATT	0	0	0	0	0	0	0	0	0	0	0	0	0	0	0.00301836	0	0	0	0	0	0	0.00157741	0.00148556		0	0	0	0	0	0.000302952	0	0	0.000653142	0	0.00167501	0	0	0	0	0	0	0	0	0	0	0	0
222	F	TTT	0	0	0	0	0	0	0	0	0.000431003	0	0	0	0	0.000991495		0	0	0	0	0	0	0	0	0.00147506	0	0	0	0	0	0.00145308	0.000463973	2.39128e-06	0	0	0	0	0	0	0	0	0	0	0	0	0	0	0
223	M	ATG	0	0	0	0	0	0	0	0	0	0	0	0	0	0	0	0	0	0	0	0	0	0.00137355	0	0.000671809	0	0.00160027	0	0	8.88229e-05	0	0	0.0012386		0	0	0	0	0	0	0	0	0	4.56387e-05	0	0	0	0
224	S	AGT	0	0	0	0	0	0	0	0	0.00214145	0	0	0	0	0	0	0	0	0	0.00257003	0	0	0	0	0.00171287	0	0	0	0	0	0	0	0	0	0	0.00321562	0	0	0	0	0	0	0.000785182	0.0003349	0	0	0	0.000307774
225	R	AGA	0	0	0.000970415	0	0	0	0	0	0	0	0	0	0	0	0	0.00178359	0	0	0	0	0	0.00179422	0	0	0.000981045	0	0	0	0	0	0	0	0	0	0	0	0	0	0	0	0		0.00112455	0.000221021	0	0	0
226	N	AAT	0	0	0	0	0	0	0	0	0	0	0.00221922	0	0	0	0	0	0	0	0	0	0.000759978	0	0	0.00135113	0.00227247	3.72973e-06	0	0	0	0	0	0	0	0.00143102		0	0	0	0	0	0	0	0	0	0	0	0
227	R	CGT	0	0	0	0	0	0	0	0	0.00212814	0	0	0	0	0	0	0	0	0	0.000248417	0	0.00501559	0	0	0	0	0	0	0	0	0.000681796	0	0	0	0	0	0	0	0	0.000749675	0	0	0	0	0.00108385	0.00231089	0.000577367
228	V	GTT	0	0	0	0	0	0	0.0023343	0	0	0	0.00207706	0	0	0	0.000389568	0	0	0	0.000410148	0	0	0	0	0.00246292	0	0	0	0	0	0.000574781	0	0	0	0	0	0	0	0	0	0	0	0	0	0	0	0	0
229	R	AGA	0	0	0.00151076	0	0	0	0	0	0	0	0	0	0	0	0	0.00177598	0	0	0	0	0	0.00181168	0	0	0.00126595	0	0	0	0	0	0	0	0	0	0	0	0	0	0	0	0		0.00247471	5.71842e-05	0	0	0
230	Q	CAA	0.00376958	0	0	0	0	0	0	0	0	0	0	0.00106668	0	0	0	0	0	0	0	0.000910941	0.00206645	0	0	0	0.000679838	0	0.00156908	0	0	0	0	0	0	0	0	0.00077027	0	0	0		0.00235282	0	0	0.00204133	0	0	0
231	W	TGG	0	0.00171637	0.00196106	0	0	0	0	0.000488052	0.00113892	0	0	0	0	0	0	0	0	0.000160174	0	0	0	0	0	0	0	0	0	0	0	0	0	0.0013053	0	0	0	0	0	0	0	0	0	0	0.00272937	0	0	0.00212744	0
232	N	AAT	0	0	0	0	0	0	0	0	0	0	0.0018617	0	0	0	0	0	0	0	0	0	0.000182651	0	0	0.00158668	0.0018038	0.000100628	0	0	0	0	0	0	0	0.00232489		0	0	0	0	0	0	0	0	0	0	0	0
233	E	GAA	0.000538923	0	0	0.000217798	0	0	0	0	0	0.000179455	0.00111886		0.0031175	0	0	0.00204389	0	0	0	0	0	0	0	0	0.00153585	0	0	0	0	0	0	0	0	0	0	0	0	0	0	0	0	0	0	0	0	0	0
234	P	CCA	0	0	0	0.00119615	0	0	0	0	0	0	0	0	0	0	0	0	0	0	0	0	0	0	0	0	0	0	0.00274371	0	0	0	0	0	0	0	0		0.000328571	0.00218096	0.00136497	0.00101794	0	0	0	0.000844427	0	0	0
235	A	GCA	0	0	0		2.26494e-05	0.00164909	0.00143878	0	0	0	0	0.000270355	0	0	0	0.000485344	0	0	0	0	0	0	0	0	0	0	0	0	0	0	0	0	0	0	0	0.000541428	0	0	0	0	0	0	0	0	0	0	0
236	F	TTC	0	0	0	0	0	0	0	0.000232873	0	0	0	0	0		0.00162072	0	0	0	0	0	0	0	0.00124689	0	0	0	0	0.00204128	5.12089e-05	0	0.000695488	0.000508573	0	0	0	0	0	0	0	0	0	0	0	0	0	0	0
237	T	ACA	0	0	0	0.00214731	0	0	0	0	0	0	0	0	0	0	0	0	0	0	0	0	0	0.00204216	0	0	0.000240259	0	0	0	0	0	0	0	0	0	0	0.000273716	0	0	0	0	0	0.00057005	0	0	0	0	0
238	V	GTT	0	0	0	0	0	0	0.00265571	0	0	0	0.00216781	0	0	0	0.00167991	0	0	0	0.00052584	0	0	0	0	0.00290435	0	0	0	0	0	0.000793246	0	0	0	0	0	0	0	0	0	0	0	0	0	0	0	0	0
239	Q	CAA	0.00154543	0	0	0	0	0	0	0	0	0	0	0.000154527	0	0	0	0	0	0	0	0.000159164	0.00151761	0	0	0	0.000627435	0	0.00131361	0	0	0	0	0	0	0	0	0.000228709	0	0	0		0.00191634	0	0	0.0025237	0	0	0
240	A	GCA	0	0	0		0.000151849	0.00121192	0.00104139	0	0	0	0	0.000165676	0	0	0	0.000672668	0	0	0	0	0	0	0	0	0	0	0	0	0	0	0	0	0	0	0	6.88866e-05	0	0	0	0	0	0	0	0	0	0	0
241	S	TCT	0	0	0	0	0	0	0.000264425	0	0.000287177	0	0	0	0	0	0.00148395	0	0	0	0	0	0	0	0	0	0	0	0	0	0	0	0	0	0	0	0	0	0	0	0.00211647	0	0	0	0	0	0	0	0
242	G	GGA	0	0	0.00106427	0.000186382	0	0	0	0	0	0	0	0.00105977	0	0	0		0.000145864	0.00230683	0.000578057	0	0	0	0	0	0	0	0	0	0	0	0	0	0	0	0	0	0	0	0	0	0	0.0022393	0	0.000339451	0	0	0
243	R	CGA	0	0	0.00395641	0	0	0	0	0	0	0	0	0	0	0	0	0.00106307	0	0	0	0	0	0	0	0	0	0	0.00162	0	0	0	0	0	0	0	0	0.000356714	0	0	0	0.00199582	0	0.000967983	0		0.000415576	0.00209996	0.00124419
244	Q	CAA	0.0026511	0	0	0	0	0	0	0	0	0	0	0.000673393	0	0	0	0	0	0	0	0.000695714	0.00358861	0	0	0	0.000512676	0	0.00120465	0	0	0	0	0	0	0	0	0.000258208	0	0	0		0.00199484	0	0	0.00179394	0	0	0
245	C	TGT	0	0	0.00164279	0	0	0	0	0.00284097		0	0	0	0	0	0.00100406	0	0	0	0.000215557	0	0	0	0	0	0	0	0	0	0	0	0	0	0	0	0	0	0	0	0	0	0	0	0	0	0	0	0.00244892
246	Q	CAA	0.00141184	0	0	0	0	0	0	0	0	0	0	0.000247553	0	0	0	0	0	0	0	0.000225832	0.00154651	0	0	0	0.000538625	0	0.00164209	0	0	0	0	0	0	0	0	0.000225832	0	0	0		0.00183324	0	0	0.00258047	0	0	0
247	L	TTA	0.000748002	0	0	0	0	0	0	0	0	0	0	0	0	0.000202434	0.000661404	0	0	0	0	0	0	0.00177852	0	0	0	0	0.00216821	0	0	0		0.002008	0	0	0	0	0	0	0	0	0	0	0	0	0	0	0
248	H	CAC	0	0	0	0	0	0	0	0	0	0.000917615	0	0	0	0	0	0	0	0	0		0.00434387	0	0	0	0	0	0	0.000943703	0	0	0	0	0	0.000208885	0	0	0.000704561	0	0	0.000917615	0.000613252	0	0	0	0.0020655	0	0
249	P	CCC	0	0	0	0	0.000564693	0	0	0	0	0	0	0	0	0	0	0	0	0	0	0.000831363	0	0	0	0	0	0	0	0.00193245	0	0	0	0	0	0	0	0.00121846		0.00017329	0.00199267	0	0	0	0	0	0.000276517	0	0
250	Q	CAA	0.00163972	0	0	0	0	0	0	0	0	0	0	6.83806e-05	0	0	0	0	0	0	0	0.000633548	0.0020379	0	0	0	0.000667801	0	0.00139995	0	0	0	0	0	0	0	0	0.000428033	0	0	0		0.00238471	0	0	0.00254741	0	0	0
251	A	GCT	0	0	0	0.000725369	0.00189703	0.000178306		0	0	0	0.00130689	0	0	0	0	0	0	0	0.000238613	0	0	0	0	0	0	0	0	0	0	0	0	0	0	0	0	0	0	0	2.75412e-05	0	0	0	0	0	0	0	0
252	P	CCT	0	0	0	0	0	0	0	0	0	0	0	0	0	0	0	0	0	0	0	0	0.00305464	0	0	0	0	0	0	0	0	0.00148052	0	0	0	0	0	0.0010891	0.00244435	0.000773429		0	0	0	0	0	0	0	0.000179977
253	V	GTA	0	0	0	0.00159712	0	0	0	0	0	0	0	0.00166959	0	0	0	0.000194653	0	0	0	0	0	0.00176337	0	0	0	0	0.00053568	0	0	0	0.000228756	0	0	0	0	0	0	0	0	0	0	0	0	0	0	0	0
254	M	ATG	0	0	0	0	0	0	0	0	0	0	0	0	0	0	0	0	0	0	0	0	0	0.0013783	0.000636297	0.000144504	0	0.000713948	0	0	0.000278237	0	0	0.00307369		0	0	0	0	0	0	0	0	0	0.000243726	0	0	0	0
255	L	TTA	0.000523373	0	0	0	0	0	0	0	0	0	0	0	0	5.04663e-05	0.0018983	0	0	0	0	0	0	0.00153049	0	0	0	0	0.00188955	0	0	0		0.00114954	0	0	0	0	0	0	0	0	0	0	0	0	0	0	0
256	K	AAA	0.00146537	0	0	0	0	0	0	0	0	0	0	0.0020659	0	0	0	0	0	0	0	0	0	0.00111506	0	0		0.00314868	0	0	0	0	0	0	0	0.000974022	0.0020932	0	0	0	0	0.00027795	0	0.00120605	0	0	0	0	0
257	V	GTT	0	0	0	0	0	0	0.00162409	0	0	0	0.00131173	0	0	0	0.000854518	0	0	0	0.000483314	0	0	0	0	0.00130721	0	0	0	0	0	0.000324874	0	0	0	0	0	0	0	0	0	0	0	0	0	0	0	0	0
258	S	AGT	0	0	0	0	0	0	0	0	0.00151667	0	0	0	0	0	0	0	0	0	0.00155754	0	0	0	0	0.000354107	0	0	0	0	0	0	0	0	0	0	0.00173465	0	0	0	0	0	0	0.00103076	0.000127044	0	0	0	0
259	K	AAA	0.00042958	0	0	0	0	0	0	0	0	0	0	0.00113112	0	0	0	0	0	0	0	0	0	0.00128908	0	0		0.000912759	0	0	0	0	0	0	0	0.000327369	0.000968511	0	0	0	0	0	0	0.00202314	0	0	0	0	0
260	N	AAT	0	0	0	0	0	0	0	0	0	0	0.00124759	0	0	0	0	0	0	0	0	0	0.000269771	0	0	0.00120013	0.00106722	0.000113129	0	0	0	0	0	0	0	0.000825137		0	0	0	0	0	0	0	0	0	0	0	0
261	L	TTA	0.000680004	0	0	0	0	0	0	0	0	0	0	0	0	0	0.00137522	0	0	0	0	0	0	0.000847976	0	0	0	0	0.000931962	0	0	0		0.000731329	0	0	0	0	0	0	0	0	0	0	0	0	0	0	0
262	N	AAT	0	0	0	0	0	0	0	0	0	0	0.00141245	0	0	0	0	0	0	0	0	0	0.000155853	0	0	0.000703599	0.00155974	0	0	0	0	0	0	0	0	0.000878509		0	0	0	0	0	0	0	0	0	0	0	0
263	K	AAA	0.000435064	0	0	0	0	0	0	0	0	0	0	0.00119805	0	0	0	0	0	0	0	0	0	0.00107634	0	0		0.00120741	0	0	0	0	0	0	0	0.000144849	0.0015023	0	0	0	0	0	0	0.00152571	0	0	0	0	0
264	F	TTT	0	0	0	0	0	0	0	0	0.000240462	0	0	0	0	0.00175329		0	0	0	0	0	0	0	0	0.00189894	0	0	0	0	0	0.0014667	0.00121769	0.000108911	0	0	0	0	0	0	0	0	0	0	0	0	0	0	0
265	V	GTT	0	0	0	0	0	0	0.00299922	0	0	0	0.00165379	0	0	0	0.000220826	0	0	0	0.000382092	0	0	0	0	0.00152939	0	0	0	0	0	2.73059e-05	0	0	0	0	0	0	0	0	0	0	0	0	0	0	0	0	0
266	E	GAG	0	0.000407233	0	0	0	2.61509e-05	0	0	0	0.000173074	0.0013806	0.00167904		0	0	0	0	0.00213358	0	0	0	0	0	0	0	0.00134387	0	0	0	0	0	0	0	0	0	0	0	0	0	0	0	0	0	0	0	0	0
267	G	GGA	0	0	0.000999874	6.01566e-05	0	0	0	0	0	0	0	0.000934421	0	0	0		6.01566e-05	0.00262685	0.00150012	0	0	0	0	0	0	0	0	0	0	0	0	0	0	0	0	0	0	0	0	0	0	0.00109805	0	8.35327e-05	0	0	0
268	K	AAA	0.0022164	0	0	0	0	0	0	0	0	0	0	0.00242805	0	0	0	0	0	0	0	0	0	0.00202827	0	0		0.00503365	0	0	0	0	0	0	0	0.000509124	0.00182133	0	0	0	0	0.000523234	0	0.00185896	0	0	0	0	0
269	E	GAA	0.0017552	0	0	4.10705e-05	0	0	0	0	0	0.000449197	0.0017456		0.00280192	0	0	0.00188964	0	0	0	0	0	0	0	0	0.00121263	0	0	0	0	0	0	0	0	0	0	0	0	0	0	0.00026674	0	0	0	0	0	0	0
270	H	CAT	0	0	0	0	0	0	0	0	0	0	0.000919445	0	0	0	0	0	0	0	0	0.00153643		0	0	0	0	0	0	0	0	0.00208976	0	0	0	0	0.000424877	0	0	0	0.000106592	0.00164416	0.000738266	0	0	0	0	0	0.00189879
271	L	TTA	0.000585681	0	0.000118596	0	0	0	0	0	0	0	0	0	0	0	0.000921398	0	0	0	0	0	0	0.00214263	0	0	0	0	0.00201126	0	0	0		0.0010625	0	0	0	0	0	0	0	0	0	0	0	0	0	0	0
272	Y	TAT	0.0034039	4.07941e-05	0	0	0	0	0	0	0.00104349	0	0	0	0	0	0.000794016	0	0	0	0	0	0.00105788	0	0	0	0	0	0	0	0	0	0	0	0	0	0.00160961	0	0	0	0	0	0	0	0	0	0	0	0
273	R	CGC	0	0	0	0	0	0	0	0.00264603	0	0	0	0	0	0	0	0	0.000530802	0	0	0.00392579	0	0	0	0	0	0	0	0.000926804	0	0	0	0	0	0	0	0	0.000270021	0	0	0	0	0	0	0.000303826		0.000144459	0.00240939
274	R	AGA	0	0	0.00143813	0	0	0	0	0	0	0	0	0	0	0	0	0.00188114	0	0	0	0	0	0.00235822	0	0	0.00190061	0	0	0	0	0	0	0	0	0	0	0	0	0	0	0	0		0.00152576	0.000308695	0	0	0
275	L	CTA	0	0	0	0	0	0	0	0	0	0	0	0	0	0	0	0	0	0	0	0	0	0.000809503	0	0	0	0		1.15583e-05	0.00146148	0.000473782	0.00284815	0	0	0	0	0.00169016	0	0	0	0.000960334	0	0	0	0.00021591	0	0	0
276	T	ACG	0	0	0	0	0	0.00224096	0	0	0	0	0	0	0	0	0	0	0	0	0	0	0	0	0	0	0	0.00085333	0	0	0	0	0	0	0.00279601	0	0	0	0	0.000360484	0	0	0	0	0.000934674	0	0	0	0
277	V	GTT	0	0	0	0	0	0	0.00183581	0	0	0	0.00135958	0	0	0	0.000893178	0	0	0	0.000377679	0	0	0	0	0.0022433	0	0	0	0	0	0.000996278	0	0	0	0	0	0	0	0	0	0	0	0	0	0	0	0	0
278	R	CGG	0	0	0	0	0	0	0	0	0	0	0	0	0	0	0	0	0	0	0	0	0	0	0	0	0	0	0	0	0.00140162	0	0	0	0	0	0	0	0	0	0	0	0.00235013	0	0.00129406	0.00138206	0.000330876		0.00140162
279	E	GAA	0.00132157	0	0	8.07994e-05	0	0	0	0	0	0.000288418	0.00178624		0.00224596	0	0	0.00234483	0	0	0	0	0	0	0	0	0.00150447	0	0	0	0	0	0	0	0	0	0	0	0	0	0	0.000362567	0	0	0	0	0	0	0
280	C	TGT	0	0	0.00182869	0	0	0	0	0.00152674		0	0	0	0	0	0.000333772	0	0	0	0.00012092	0	0	0	0	0	0	0	0	0	0	0	0	0	0	0	0	0	0	0	0	0	0	0	0	0	0	0	0.00186334
281	A	GCA	0	0	0		0.000349358	0.00191039	0.000899438	0	0	0	0	0.000423693	0	0	0	0.000706167	0	0	0	0	0	0	0	0	0	0	0	0	0	0	0	0	0	0	0	2.22839e-05	0	0	0	0	0	0	0	0	0	0	0
282	R	CGA	0	0	0.00391253	0	0	0	0	0	0	0	0	0	0	0	0	0.000844083	0	0	0	0	0	0	0	0	0	0	0.00103555	0	0	0	0	0	0	0	0	7.32886e-05	0	0	0	0.00204691	0	0.000682069	0		0.000304036	0.00227275	0.00109938
283	V	GTG	0	0	0	0	0	0.00159409	0	0	0	0	0	0	0.00149813	0	0	0	0	0.000376926	0	0	0	0	0	0	0	0	0	0	0.000654701	0	0	0.00120015	0.00356376	0	0	0	0	0	0	0	0	0	0	0	0	0	0
284	Q	CAA	0.00581594	0	0	0	0	0	0	0	0	0	0	0.00034037	0	0	0	0	0	0	0	0.000423649	0.00188623	0	2.28997e-05	0	0.000303936	0	0.00191746	0	0	0	0	0	0	0	0	0.000205042	0	0	0		0.00247959	0	0	0.00255246	0	0	0
285	G	GGA	0	0	0.0016721	3.6708e-05	0	0	0	0	0	0	0	0.0015827	0	0	0		0	0.00161425	0.00147227	0	0	0	0	0	0	0	0	0	0	0	0	0	0	0	0	0	0	0	0	0	0	0.000967459	0	0	0	0	0
286	F	TTT	0	0	0	0	0	0	0	0	0.00048503	0	0	0	0	0.00160237		0	0	0	0	0	0	0	0	0.000861112	0	0	0	0	0	0.00166778	0.0013135	0.000163454	0	0	0	0	0	0	0	0	0	0	0	0	0	0	0
287	P	CCA	0	0	0	0.00020705	0	0	0	0	0	0	0	0	0	0	0	0	0	0	0	0	0	0	0	0	0	0	0.00126538	0	0	0	0	0	0	0	0		0.000390865	0.00289744	0.0020452	0.00101472	0	0	0	0.000491128	0	0	0
288	D	GAT	0	0	0	0	0	0	0.000328327	0	0	0.00102379		0.00174169	0.000204938	0	0	0	0	0	0.00211747	0	0.000283458	0	0	0	0	0	0	0	0	0	0	0	0	0	0.00118644	0	0	0	0	0	0	0	0	0	0	0	0
289	D	GAT	0	0	0	0	0	0	0	0	0	0.00180756		0.00213665	0.000560442	0	0	0	0	0	0.00186529	0	0	0	0	0	0	0	0	0	0	0	0	0	0	0	0.000727879	0	0	0	0	0	0	0	0	0	0	0	0
290	F	TTT	0	0	0	0	0	0	0	0	0.000547522	0	0	0	0	0.000695383		0	0	0	0	0	0	0	0	0.0011674	0	0	0	0	0	0.00138919	0.000678322	0	0	0	0	0	0	0	0	0	0	0	0	0	0	0	0
291	I	ATT	0	0	0	0	0	0	0	0	0	0	0	0	0	0	0.000343131	0	0	0	0	0	0	0.0013787	0.00139577		0	0	0	0	0	0	0	0	0.000462621	0	0.0024598	0	0	0	0	0	0	0	0	0	0	0	0
292	F	TTT	0	0	0	0	0	0	0	0	0.00019047	0	0	0	0	0.00214599		0	0	0	0	0	0	0	0	0.00145614	0	0	0	0	0	0.00181532	0.00131931	0.000201873	0	0	0	0	0	0	0	0	0	0	0	0	0	0	0
293	H	CAT	0	0	0	0	0	0	0	0	0	0	0.000191952	0	0	0	0	0	0	0	0	0.0023739		0	0	0	0	0	0	0	0	0.000632864	0	0	0	0	0.000305006	0	0	0	0	0.00196125	0.000497199	0	0	0	0	0	0.00192734
294	Y	TAC	0.000665838	0.00101647	0	0	0	0	0	0.00198789	0	4.50483e-05	0	0	0	0.000585365	0	0	0	0	0	0.000901508	0	0	0	0	0	0	0	0	0	0	0	0	0	0.000734814	0	0	0	0	0	0	0	0	0	0	0	0	0
295	E	GAA	0.000860071	0	0	1.75523e-05	0	0	0	0	0	0.000467665	0.00177761		0.0022912	0	0	0.00209499	0	0	0	0	0	0	0	0	0.00117169	0	0	0	0	0	0	0	0	0	0	0	0	0	0	0	0	0	0	0	0	0	0
296	S	AGT	0	0	0	0	0	0	0	0	0.00152263	0	0	0	0	0	0	0	0	0	0.0024368	0	0	0	0	0.000749997	0	0	0	0	0	0	0	0	0	0	0.00195907	0	0	0	0	0	0	0.000708711	0.000207387	0	0	0	0.000915139
297	L	TTG	0	0.00148751	0	0	0	0	0	0	0	0	0	0	0	4.03366e-05	0.000709148	0	0	0	0	0	0	0	0	0	0	0	0	0	0.00186804	0	0.00177579		0.00129724	0	0	0	0	0	0	0	0	0	0	0	0	0	0
298	N	AAT	0	0	0	0	0	0	0	0	0	0	0.00190367	0	0	0	0	0	0	0	0	0	0.000127023	0	0	0.00196712	0.00276316	0.000225084	0	0	0	0	0	0	0	0.00152873		0	0	0	0	0	0	0	0	0	0	0	0
299	D	GAT	0	0	0	0	0	0	5.88473e-05	0	0	0.00167576		0.00204014	0.000127168	0	0	0	0	0	0.00262086	0	0	0	0	0	0	0	0	0	0	0	0	0	0	0	0.000981173	0	0	0	0	0	0	0	0	0	0	0	0
300	G	GGT	0	0	0	0	0	0	0.000656714	0	0.000868644	0	0.0029593	0	0	0	0	0.00166481	0.00218032	0.000370322		0	0	0	0	0	0	0	0	0	0	0	0	0	0	0	0	0	0	0	0	0	0	0	0	0	0	0	0.000175576
301	Y	TAT	0.00188016	5.49152e-05	0	0	0	0	0	0	0.00147964	0	0.000169351	0	0	0	0.00181722	0	0	0	0	0	0.00124504	0	0	0	0	0	0	0	0	0	0	0	0	0	0.000455439	0	0	0	0	0	0	0	0	0	0	0	0
302	K	AAA	0.000343478	0	0	0	0	0	0	0	0	0	0	0.0011096	0	0	0	0	0	0	0	0	0	0.00380567	0	0		0.00188158	0	0	0	0	0	0	0	0.00143126	0.00180555	0	0	0	0	5.1063e-05	0	0.00229096	0	0	0	0	0
303	M	ATG	0	0	0	0	0	0	0	0	0	0	0	0	0	0	0	0	0	0	0	0	0	0.00131923	0	0.000666769	0	0.00268455	0	0	0.000775512	0	0	0.00255769		0	0	0	0	0	0	0	0	0	0	0	0	0	0
304	I	ATC	0	0	0	0	0	0	0	0	0	0	0	0	0	0.00347783	0	0	0	0	0	0	0	0.00160722		0.0023421	0	0	0	0.000186038	0	0	0	0	0.000507929	0.00306484	0	0	0	0	0	0	0	0	0	0	0	0	0
305	G	GGT	0	0	0	0	0	0	0.000367181	0	0.00159524	0	0.00263628	0	0	0	0	0.000872118	0.00145186	0.000342246		0	0	0	0	0	0	0	0	0	0	0	0	0	0	0	0	0	0	0	0	0	0	0	0	0	0	0	9.28941e-05
306	N	AAC	0	0	0	0	0	0	0	0	0	0.00145275	0	0	0	0	0	0	0	0	0	0	0	0	0.00170312	0	0.000870642	0.000695383	0	0	0	0	0	0	0		0.00346822	0	0	0	0	0	0	0	0	0	0	0	0
307	A	GCT	0	0	0	0.00132411	0.00218683	0.000543854		0	0	0	0.00108305	0	0	0	0	0	0	0	0.000252052	0	0	0	0	0	0	0	0	0	0	0	0	0	0	0	0	0	0	0	0.000271083	0	0	0	0	0	0	0	0
308	V	GTG	0	0	0	0	0	0.00140243	0	0	0	0	0	0	0.00125242	0	0	0	0	0.000241499	0	0	0	0	0	0	0	0	0	0	7.84467e-05	0	0	0.000208889	0.00251119	0	0	0	0	0	0	0	0	0	0	0	0	0	0
309	P	CCT	0	0	0	0	0	0	0.000250129	0	0	0	0	0	0	0	0	0	0	0	0	0	0.00294694	0	1.13854e-06	0	0	0	0	0	0	0.00213856	0	0	0	0	0	0.00144945	0.00229759	0.000707328		0	0	0	0	0	0	0	0.000422407
310	V	GTA	0	0	0	0.0011356	0	0	0	0	0	0	0	0.000771688	0	0	0	0.000192122	0	0	0	0	0	0.00234191	0	0	0	0	0.000495383	0	0	0	0.000246035	0	0	0	0	0	0	0	0	0	0	0	0	0	0	0	0
311	N	AAT	0	0	0	0	0	0	0	0	0	0	0.00166321	0	0	0	0	0	0	0	0	0	4.61689e-05	0	0	0.00187505	0.00172676	0.000399234	0	0	0	0	0	0	0	0.000950015		0	0	0	0	0	0	0	0	0	0	0	0
312	L	TTA	0.000170597	0	0.000119935	0	0	0	0	0	0	0	0	0	0	1.13738e-05	0.000771302	0	0	0	0	0	0	0.0015457	0	0	0	0	0.00108251	0	0	0		0.0011187	0	0	0	0	0	0	0	0	0	0	0	0	0	0	0
313	A	GCA	0	0	0		0.000290064	0.00187069	0.00263454	0	0	0	0	0.000539637	0	0	0	0.000804335	0	0	0	0	0	0	0	0	0	0	0	0	0	0	0	0	0	0	0	0.000335441	0	0	0	0	0	0	0	0	0	0	0
314	Y	TAT	0.00185075	7.55406e-05	0	0	0	0	0	0	0.0014832	0	0	0	0	0	0.00112346	0	0	0	0	0	0.00105308	1.25416e-05	0	0	0	0	0	0	0	0	0	0	0	0	0.00141282	0	0	0	0	0	0	0	0	0	0	0	0
315	E	GAA	0.00070643	0	0	0.000373713	0	0	0	0	0	0.00147736	0.001875		0.00178573	0	0	0.00240247	0	0	0	0	0	0	0	0	0.000957996	0	0	0	0	0	0	0	0	0	0	0	0	0	0	0	0	0	0	0	0	0	0
316	I	ATA	0	0	0	0	0	0	0	0	0	0	0	0	0	0	0	0	0	0	0	0	0		0.000200666	0.000787459	0.00201282	0	0.000545839	0	0	0	0.00102045	0	0.00178846	0	0	0	0	0	0	0	0	4.5338e-05	0	0	0	0	0
317	A	GCT	0	0	0	0.00083033	0.00123078	0.000189607		0	0	0	0.00126638	0	0	0	0	0	0	0	0.000429878	0	0	0	0	0	0	0	0	0	0	0	0	0	0	0	0	0	0	0	0.000216303	0	0	0	0	0	0	0	0
318	K	AAG	0	0.000536693	0	0	0	0	0	0	0	0	0	0	0.00169496	0	0	0	0	0	0	0	0	0	0	0	0.00121695		0	0	0	0	0	0	0.00275211	0.000306878	0.00150192	0	0	0	0	0	0	0	0.00209944	0	0	0	0
319	T	ACA	0	0	0	0.00247961	0	0	0	0	0	0	0	0	0	0	0	0	0	0	0	0	0	0.00283523	0	0	0.00054242	0	0	0	0	0	0	0	0	0	0	0.000168085	0	0	0	0	0	0.000767022	0	0	0	0	0
320	I	ATA	0	0	0	0	0	0	0	0	0	0	0	0	0	0	0	0	0	0	0	0	0		0	0.000465926	0.00223091	0	0.000335187	0	0	0	0.00140912	0	0.00115698	0	0	0	0	0	0	0	0	3.63531e-05	0	0	0	0	0
321	K	AAA	0.00278911	0	0	0	0	0	0	0	0	0	0	0.00190387	0	0	0	0	0	0	0	0	0	0.00221464	0	0		0.00131056	0	0	0	0	0	0	0	0.000990366	0.00323174	0	0	0	0	0.00130114	0	0.00127289	0	0	0	0	0
322	S	TCT	0	0	0	0	0	0	0.000378999	0	0.000388697	0	0	0	0	0	0.00175606	0	0	0	0	0	0	0	0	0	0	0	0	0	0	0	0	0	0	0	0	0	0	0	0.00162999	0	0	0	0	0	0	0	0
323	A	GCA	0	0	0		0.000316742	0.00165587	0.00249403	0	0	0	0	0.0006732	0	0	0	0.00048052	0	0	0	0	0	0	0	0	0	0	0	0	0	0	0	0	0	0	0	0.000451618	0	0	0	0	0	0	0	0	0	0	0
324	L	TTG	0	0.00158009	0	0	0	0	0	0	0	0	0	0	0	0	0.000545634	0	0	0	0	0	0	0	0	0	0	0	0	0	0.0026046	0	0.00112254		0.0026046	0	0	0	0	0	0	0	0	0	0	0	0	0	0
325	E	GAA	0.000647427	0	0	0.000101722	0	0	0	0	0	0.000400316	0.00201684		0.00218158	0	0	0.00193447	0	0	0	0	0	0	0	0	0.000904836	0	0	0	0	0	0	0	0	0	0	0	0	0	0	9.05509e-06	0	0	0	0	0	0	0
326	I	ATT	0	0	0	0	0	0	0	0	0	0	0	0	0	0	0.00101857	0	0	0	0	0	0	0.00121309	0.00121309		0	0	0	0	0	0.000759213	0	0	5.67832e-05	0	0.0022073	0	0	0	0	0	0	0	0	0	0	0	0
327	R	CGT	0	0	0	0	0	0	0	0	0.00166165	0	0	0	0	0	0	0	0	0	0.000122806	0	0.00231187	0	0	0	0	0	0	0	0	0.000588794	0	0	0	0	0	0	0	0	0.00014448	0	0	0	0	0.000307034	0.00104395	0.000166154
328	K	AAA	0.000186514	0	0	0	0	0	0	0	0	0	0	0.000808587	0	0	0	0	0	0	0	0	0	0.00267481	0	0		0.00154376	0	0	0	0	0	0	0	0.00172473	0.00215453	0	0	0	0	0.000276997	0	0.00235812	0	0	0	0	0
329	G	GGT	0	0	0	0	0	0	0.000167489	0	0.00204876	0	0.00135377	0	0	0	0	0.000419124	0.00172523	0.000538951		0	0	0	0	0	0	0	0	0	0	0	0	0	0	0	0	0	0	0	0	0	0	0	0	0	0	0	0.000191454
330	N	AAT	0	0	0	0	0	0	0	0	0	0	0.00161093	0	0	0	0	0	0	0	0	0	0	0	0	0.00192736	0.00135535	0.000466906	0	0	0	0	0	0	0	0.00118496		0	0	0	0	0	0	0	0	0	0	0	0
331	-	TAG	0.00195212		0	0	0	0	0	0	0	0	0	0	0.000158412	0	0	0	0	0	0	0	0	0	0	0	0	0.000970164	0	0	0	0	0	0.000799958	0	0	0	0	0	0	0	0	0.00142841	0	0	0	0	0	0
[truncated: 40 more columns]

## Sheet: G3
			TAA	TAG	TGA	GCA	GCC	GCG	GCT	TGC	TGT	GAC	GAT	GAA	GAG	TTC	TTT	GGA	GGC	GGG	GGT	CAC	CAT	ATA	ATC	ATT	AAA	AAG	CTA	CTC	CTG	CTT	TTA	TTG	ATG	AAC	AAT	CCA	CCC	CCG	CCT	CAA	CAG	AGA	AGG	CGA	CGC	CGG	CGT
			-	-	-	A	A	A	A	C	C	D	D	E	E	F	F	G	G	G	G	H	H	I	I	I	K	K	L	L	L	L	L	L	M	N	N	P	P	P	P	Q	Q	R	R	R	R	R	R
2	N	AAT	0	0	0	0	0	0	0.000109439	0	0	0	0.003925	0	0	0	0	0	0	0	0	0	0	0	0	0.0029329	0.00217994	0.000627919	0	0	0	0	0	0	0	0.000894912		0	0	0	0	0	0	0	0	0	0	0	0
3	L	TTA	0	0	0	0	0	0	0	0	0	0	0	0	0	0	0	0	0	0	0	0	0	0.00277273	0	0	0	0	0.00201776	0	0	0		0.00121192	0	0	0	0	0	0	0	0	0	0	0	0	0	0	0
4	I	ATT	0	0	0	0	0	0	0	0	0	0	0	0	0	0	0	0	0	0	0	0	0	0.00132014	0.00282258		0	0	0	0	0	0	0	0	6.24002e-05	0	0	0	0	0	0	0	0	0	0	0	0	0	0
5	S	AGT	0	0	0	0	0	0	0	0	0	0	0	0	0	0	0	0	0	0	0.000612399	0	0	0	0	0	0	0	0	0	0	0	0	0	0	0	0	0	0	0	0	0	0	0	5.36422e-06	0	0	0	0
6	L	CTT	0	0	0	0	0	0	0	0	0	0	0	0	0	0	0.00015882	0	0	0	0	0	0	0	0	0.000983688	0	0	0.00310808	0.00381117	0.00161745		0	0	0	0	0	0	0	0	0.00181033	0	0	0	0	0	0	0	3.9712e-05
7	F	TTT	0	0	0	0	0	0	0	0	1.00474e-05	0	0	0	0	0.00343659		0	0	0	0	0	0	0	0	0	0	0	0	0	0	0.00047581	0	0	0	0	0	0	0	0	0	0	0	0	0	0	0	0	0
8	S	TCA	0	0	0	8.03778e-05	0	0	0	0	0	0	0	0	0	0	0	0	0	0	0	0	0	0	0	0	0	0	0	0	0	0	9.63448e-05	0	0	0	0	0.000839805	0	0	0	0	0	0	0	0	0	0	0
9	G	GGT	0	0	0	0	0	0	0	0	0	0	0.000116257	0	0	0	0	0.0020002	0.00279945	0.000317167		0	0	0	0	0	0	0	0	0	0	0	0	0	0	0	0	0	0	0	0	0	0	0	0	0	0	0	0
10	A	GCA	0	0	0		0.000210376	0.00445189	0.00296797	0	0	0	0	2.10449e-05	0	0	0	6.03865e-05	0	0	0	0	0	0	0	0	0	0	0	0	0	0	0	0	0	0	0	0	0	0	0	0	0	0	0	0	0	0	0
11	G	GGG	0	0	0	0	0	0	0	0	0	0	0	0	6.28975e-05	0	0	0.00232371	0.000219862		0.00199659	0	0	0	0	0	0	0	0	0	0	0	0	0	0	0	0	0	0	0	0	0	0	0	0.000172377	0	0	0	0
12	G	GGA	0	0	0	0	0	0	0	0	0	0	0	4.51655e-05	0	0	0		0.000199581	0.00757814	0.0033171	0	0	0	0	0	0	0	0	0	0	0	0	0	0	0	0	0	0	0	0	0	0	0	0	0	0	0	0
13	L	TTA	0	0	0	0	0	0	0	0	0	0	0	0	0	0	0	0	0	0	0	0	0	0.000994014	0	0	0	0	0.00307256	0	0	0		0.00170982	0	0	0	0	0	0	0	0	0	0	0	0	0	0	0
14	D	GAT	0	0	0	0	0	0	0	0	0	0.00364793		0.00200221	0.000251474	0	0	0	0	0	0.000758481	0	0	0	0	0	0	0	0	0	0	0	0	0	0	0	4.63739e-05	0	0	0	0	0	0	0	0	0	0	0	0
15	L	CTT	0	0	0	0	0	0	0	0	0	0	0	0	0	0	0.00360806	0	0	0	0	0	0.00170605	0	0	0.00319631	0	0	0.00285444	0.00476211	0.000315909		0	0	0	0	0	0	0	0	0.000810771	0	0	0	0	0	0	0	0.000357462
16	G	GGC	0	0	0	0	0	0	0	0	0	4.3491e-05	0	0	0	0	0	0.00543306		0.000516374	0.00634212	0	0	0	0	0	0	0	0	0	0	0	0	0	0	0	0	0	0	0	0	0	0	0	0	0	0	0	0
17	F	TTC	0	0	0	0	0	0	0	0	0	0	0	0	0		0.00262986	0	0	0	0	0	0	0	0	0	0	0	0	0.00166828	0	0	0.000182204	0	0	0	0	0	0	0	0	0	0	0	0	0	0	0	0
18	Q	CAA	7.57462e-05	0	0	0	0	0	0	0	0	0	0	5.5677e-05	0	0	0	0	0	0	0	0.000350981	0.00359933	0	0	0	0.00156947	0	0.00195938	0	0	0	0	0	0	0	0	0	0	0	0		0.00540555	0	0	0.00460279	0	0	0
19	K	AAA	0	0	0	0	0	0	0	0	0	0	0	0.00435064	9.93843e-06	0	0	0	0	0	0	0	0	0.00488832	0	0		0.0100073	0	0	0	0	0	0	0	0.000819549	0.00397646	0	0	0	0	0.00154904	0	0.00513358	0	0	0	0	0
20	A	GCA	0	0	0		0.000634911	0.00377127	0.00197026	0	0	0	0	0	0	0	0	0.000227458	0	0	0	0	0	0	0	0	0	0	0	0	0	0	0	0	0	0	0	0	0	0	0	0	0	0	0	0	0	0	0
21	G	GGA	0	0	0	4.3102e-05	0	0	0	0	0	0	0	0.00180423	0	0	0		3.59575e-05	0.00254368	0.00275445	0	0	0	0	0	0	0	0	0	0	0	0	0	0	0	0	0	0	0	0	0	0	0.00126839	0	0	0	0	0
22	F	TTT	0	0	0	0	0	0	0	0	0.000332729	0	0	0	0	0.00220134		0	0	0	0	0	0	0	0	0	0	0	0	0	0	0.00169965	0.000336365	0	0	0	0	0	0	0	0	0	0	0	0	0	0	0	0
23	R	CGT	0	0	0	0	0	0	0	0	0.00325168	0	0	0	0	0	0	0	0	0	6.08955e-05	0	0.00955889	0	0	0	0	0	0	0	0	0.00118771	0	0	0	0	0	0	0	0	0.00202446	0	0	0	0	0.00243353	0.00313268	0.000362124
24	I	ATT	0	0	0	0	0	0	0	0	0	0	0	0	0	0	2.06007e-05	0	0	0	0	0	0	0.00151117	0.00390543		0	0	0	0	0	4.22031e-05	0	0	0	0	0	0	0	0	0	0	0	0	0	0	0	0	0
25	I	ATT	0	0	0	0	0	0	0	0	0	0	0	0	0	0	0.000789171	0	0	0	0	0	0	0.00121712	0.00339165		0	0	0	0	0	0.000114196	0	0	6.33953e-06	0	0.00326988	0	0	0	0	0	0	0	0	0	0	0	0
26	A	GCC	0	0	0	0.00340273		0.000481781	0.00475709	0	0	0	0	0	0	0	0	0	0.000434615	0	0	0	0	0	0	0	0	0	0	0	0	0	0	0	0	0	0	0	0	0	0	0	0	0	0	0	0	0	0
27	A	GCA	0	0	0		6.73266e-05	0.00298167	0.00282431	0	0	0	0	0	0	0	0	0.000257464	0	0	0	0	0	0	0	0	0	0	0	0	0	0	0	0	0	0	0	0	0	0	0	0	0	0	0	0	0	0	0
28	N	AAT	0	0	0	0	0	0	0	0	0	0	0.00057653	0	0	0	0	0	0	0	0	0	0	0	0	0.00207055	0	0	0	0	0	0	0	0	0	0.00267204		0	0	0	0	0	0	0	0	0	0	0	0
29	E	GAA	0	0	0	0	0	0	0	0	0	0.000583309	0.00371847		0.00540591	0	0	0.000854561	0	0	0	0	0	0	0	0	7.55015e-05	0	0	0	0	0	0	0	0	0	0	0	0	0	0	0	0	0	0	0	0	0	0
30	Y	TAT	0	0	0	0	0	0	0	0	0.00259777	0	0	0	0	0	0.00178185	0	0	0	0	0	0.0026412	0	0	0	0	0	0	0	0	0	0	0	0	0	0.00295765	0	0	0	0	0	0	0	0	0	0	0	0
31	D	GAT	0	0	0	0	0	0	0	0	0	0.00235527		0.00134452	0	0	0	0	0	0	0.000964357	0	0.000191963	0	0	0	0	0	0	0	0	0	0	0	0	0	0.00175184	0	0	0	0	0	0	0	0	0	0	0	0
32	K	AAA	0	0	0	0	0	0	0	0	0	0	0	0.00202666	0	0	0	0	0	0	0	0	0	0.00153205	0	0		0.00306473	0	0	0	0	0	0	0	0.000188669	0.00153511	0	0	0	0	0	0	0.00334257	0	0	0	0	0
33	S	TCA	0	0	0	0.000897796	0	0	0	0	0	0	0	0	0	0	0	0	0	0	0	0	0	0	0	0	0	0	0	0	0	0	0.0018609	0	0	0	0	0.00116984	0	0	0	0	0	0	0	0	0	0	0
34	I	ATA	0	0	0	0	0	0	0	0	0	0	0	0	0	0	0	0	0	0	0	0	0		0.000198933	0.00328106	9.66214e-05	0	0	0	0	0	0.00247536	0	0.00282066	0	0	0	0	0	0	0	0	0	0	0	0	0	0
35	W	TGG	0	0.000258137	0.000159858	0	0	0	0	0.000115474	0.000403971	0	0	0	0	0	0	0	0	0	0	0	0	0	0	0	0	0	0	0	0	0	0	0.00017571	0	0	0	0	0	0	0	0	0	0	2.03651e-05	0	0	0.000961943	0
36	K	AAA	0	0	0	0	0	0	0	0	0	0	0	0.00389905	0	0	0	0	0	0	0	0	0	0.00193256	0	0		0.00296341	0	0	0	0	0	0	0	0.000560296	0.00144341	0	0	0	0	7.77034e-05	0	0.00285179	0	0	0	0	0
37	T	ACA	0	0	0	0.000974769	0	0	0	0	0	0	0	0	0	0	0	0	0	0	0	0	0	5.73163e-05	0	0	0	0	0	0	0	0	0	0	0	0	0	0.000106466	0	0	0	0	0	0	0	0	0	0	0
38	Y	TAT	0	0	0	0	0	0	0	0	0.000397278	0	0	0	0	0	0.00131245	0	0	0	0	0	0.000790436	0	0	0	0	0	0	0	0	0	0	0	0	0	0	0	0	0	0	0	0	0	0	0	0	0	0
39	E	GAA	0	0	0	0.000298435	0	0	0	0	0	0.000423497	0.00280306		0.00330669	0	0	0.00249547	0	0	0	0	0	0	0	0	0.000852765	0	0	0	0	0	0	0	0	0	0	0	0	0	0	0.000203794	0	0	0	0	0	0	0
40	S	AGT	0	0	0	0	0	0	0	0	0.00257136	0	0	0	0	0	0	0	0.000351067	0	0.00462631	0	0	0	0	0.000767019	0	0	0	0	0	0	0	0	0	0	0.00403202	0	0	0	0	0	0	0.00160833	0.000194212	0	0	0	0.000960342
41	N	AAT	0	0	0	0	0	0	0	0	0	0	0.000302065	0	0	0	0	0	0	0	0	0	0	0	0	0	0	0	0	0	0	0	0	0	0	0.00362314		0	0	0	0	0	0	0	0	0	0	0	0
42	H	CAT	0	0	0	0	0	0	0	0	0	0	0	0	0	0	0	0	0	0	0	0.00509151		0	0	0	0	0	0	0	0	0.00118531	0	0	0	0	9.76502e-05	0	0	0	0	0.000921528	0.000213282	0	0	0	0	0	0.00044816
43	S	TCA	0	0	0	1.90097e-05	0	0	0	0	0	0	0	0	0	0	0	0	0	0	0	0	0	0	0	0	0	0	0	0	0	0	0.0029316	0	0	0	0	0.00400277	0	0	0	0	0	0	0	0	0	0	0
44	A	GCT	0	0	0	0.00192586	0.00199277	0		0	0	0	0	0	0	0	0	0	0	0	0.000816535	0	0	0	0	0	0	0	0	0	0	0	0	0	0	0	0	0	0	0	0.00108066	0	0	0	0	0	0	0	0
45	K	AAA	0	0	0	0	0	0	0	0	0	0	0	0.00225337	0	0	0	0	0	0	0	0	0	0.00119972	0	0		0.00206637	0	0	0	0	0	0	9.76523e-05	0.000221594	0.00308406	0	0	0	0	0.000408589	0	0.00226416	0	0	0	0	0
46	L	TTG	0	0	0	0	0	0	0	0	0	0	0	0	0	0.000104335	0	0	0	0	0	0	0	0	0	0	0	0	0	0	0.00394219	0	0.00231848		0.00287378	0	0	0	0	0	0	0	0	0	0	0	0	0	0
47	I	ATC	0	0	0	0	0	0	0	0	0	0	0	0	0	0.00417843	0	0	0	0	0	0	0	0.000364908		0.00495863	0	0	0	0.000210967	0	0	0	0	0.000676287	0.00473471	0.000141957	0	0	0	0	0	0	0	0	0	0	0	0
48	K	AAA	2.60019e-05	0	0	0	0	0	0	0	0	0	0	0.00186517	0	0	0	0	0	0	0	0	0	0.00168777	0	0		0.00400845	0	0	0	0	0	0	0	0.000203402	0.000225124	0	0	0	0	0.000297532	0	0.00378761	0	0	0	0	0
49	G	GGC	0	0	0	0	0.000470576	0	0	0.00166702	0	0.00425872	0	0	0	0	0	0.00153211		0.000278861	0.00514274	0	0	0	0	0	0	0	0	0	0	0	0	0	0	0	0	0	0	0	0	0	0	0	0	0	0	0	1.37983e-05
50	D	GAT	0	0	0	0	0	0	0	0	0	0.00244444		0.000743471	0	0	0	0	0	0	0.000863985	0	0.000237313	0	0	0	0	0	0	0	0	0	0	0	0	0	0.00350152	0	0	0	0	0	0	0	0	0	0	0	0
51	I	ATA	0	0	0	0	0	0	0	0	0	0	0	0	0	0	0	0	0	0	0	0	0		0.000329057	0.00249369	0	0	0	0	0	0	0.00313301	0	0.000474987	0	0	0	0	0	0	0	0	0	0	0	0	0	0
52	S	TCT	0	0	0	0	0	0	0	0	0	0	0	0	0	0	0.000852307	0	0	0	0	0	0	0	0	0	0	0	0	0	0	0	0	0	0	0	0	0	0	0	0.00111605	0	0	0	0	0	0	0	0
53	K	AAA	0	0	0	0	0	0	0	0	0	0	0	0.00156008	0	0	0	0	0	0	0	0	0	0.00152347	0	0		0.00149051	0	0	0	0	0	0	0	0.000384818	0.00129647	0	0	0	0	0.000483672	0	0.000970618	0	0	0	0	0
54	I	ATT	0	0	0	0	0	0	0	0	0	0	0	0	0	0	0.00241412	0	0	0	0	0	0	0.00159337	0.00233022		0	0	0	0	0	0.000747079	0	0	0.000765318	0	0	0	0	0	0	0	0	0	0	0	0	0	0
55	S	TCT	0	0	0	0	0	0	0	0	0	0	0	0	0	0	0.000656436	0	0	0	0	0	0	0	0	0	0	0	0	0	0	0	0	0	0	0	0	0	0	0	0.00282063	0	0	0	0	0	0	0	0
56	S	TCA	0	0	0	0	0	0	0	0	0	0	0	0	0	0	0	0	0	0	0	0	0	0	0	0	0	0	0	0	0	0	0.000895687	0	0	0	0	0.00442824	0	2.94694e-05	0	0	0	0	0	0	0	0	0
57	D	GAT	0	0	0	0	0	0	0.000257266	0	0	0.00249632		0.00147437	1.95226e-05	0	0	0	0	0	0.00273761	0	0.00120114	0	0	0	0	0	0	0	0	0	0	0	0	0	0.00389794	0	0	0	0	3.50422e-05	0	0	0	0	0	0	0
58	E	GAA	0	0	0	0.000500327	0	0	0	0	0	0.000564056	0.0034673		0.00446573	0	0	0.00274149	0	0	0	0	0	0	0	0	0.00401608	0	0	0	0	0	0	0	0	0	0	0	0	0	0	0.000383489	0	0	0	0	0	0	0
59	F	TTC	0	0	0	0	0	0	0	0	0	0	0	0	0		0.00208234	0	0	0	0	0	0	0	0.000588317	0	0	0	0	0.00315294	0	0	0.000388655	0	0	0	0	0	0	0	0	0	0	0	0	0	0	0	0
60	P	CCT	0	0	0	0	0	0	0	0	0	0	0	0	0	0	0	0	0	0	0	0	0.000293716	0	0	0	0	0	0	0	0	7.41494e-06	0	0	0	0	0	0.00155065	0.00293327	0		0	0	0	0	0	0	0	0
61	K	AAG	0	0	0	0	0	0	0	0	0	0	0	0	0.00363981	0	0	0	0	0	0	0	0	0	0	0	0.00680194		0	0	0	0	0	0	0.00415691	0.00110266	0.00156024	0	0	0	0	0	8.93811e-06	0	0.00363609	0	0	0	0
62	C	TGT	0	0	0	0	0	0	0	0.00431031		0	0	0	0	0	0	0	0	0	0.000381732	0	0	0	0	0	0	0	0	0	0	0	0	0	0	0	0	0	0	0	0	0	0	0	0	0	0	0	0.00118966
63	D	GAT	0	0	0	0	0	0	0.000167208	0	0	0.00306798		0.00155009	0.000127071	0	0	0	0	0	0.00377949	0	0.001094	0	0	0	0	0	0	0	0	0	0	0	0	0	0.00324677	0	0	0	0	0	0	0	0	0	0	0	0
64	G	GGA	0	0	0	0.00010104	0	0	0	0	0	0	0	0	0	0	0		0.000135076	0.00696507	0.00135283	0	0	0	0	0	0	0	0	0	0	0	0	0	0	0	0	0	0	0	0	0	0	5.18758e-05	0	0	0	0	0
65	I	ATT	0	0	0	0	0	0	0	0	0	0	0	0	0	0	0	0	0	0	0	0	0	0.00183057	0.00275893		0	0	0	0	0	0.000473177	0	0	0.000550848	0	0	0	0	0	0	0	0	0	0	0	0	0	0
66	I	ATT	0	0	0	0	0	0	0	0	0	0	0	0	0	0	0	0	0	0	0	0	0	0.00479414	0.00475023		0	0	0	0	0	0	0	0	0	0	0	0	0	0	0	0	0	0	0	0	0	0	0
67	G	GGG	0	0	0	0	0	0	0	0	0	0	0	0	0.000175006	0	0	0.00386157	0.000118923		0.00102374	0	0	0	0	0	0	0	0	0	0	0	0	0	0	0	0	0	0	0	0	0	0	0	0.000100228	0	0	0	0
68	G	GGG	0	0	0	0	0	2.85331e-05	0	0	0	0	0	0	0.000275775	0	0	0.00938509	0.00139995		0.000901605	0	0	0	0	0	0	0	0	0	0	0	0	0	0	0	0	0	0	0	0	0	0	0	7.4891e-05	0	0	0	0
69	P	CCG	0	0	0	0	0	0	0	0	0	0	0	0	0	0	0	0	0	0	0	0	0	0	0	0	0	0	0	0	0.000373212	0	0	0	0	0	0	0.0100436	0.00183025		0.000861356	0	0	0	0	0	0	0	0
70	P	CCT	0	0	0	0	0	0	0	0	0	0	0	0	0	0	0	0	0	0	0	0	0	0	0	0	0	0	0	0	0	1.11924e-05	0	0	0	0	0	0.00710627	0.00392282	0.00246648		0	0	0	0	0	0	0	0
71	C	TGT	0	0	0	0	0	0	0	0.00424065		0	0	0	0	0	0	0	0	0	0	0	0	0	0	0	0	0	0	0	0	0	0	0	0	0	0	0	0	0	0	0	0	0	0	0	0	0	0.00100321
72	Q	CAA	8.022e-05	0	0	0	0	0	0	0	0	0	0	0	0	0	0	0	0	0	0	1.94112e-05	0	0	0	0	0	0	0	0	0	0	0	0	0	0	0	0	0	0	0		0.00546179	0	0	0.000661704	0	0	0
73	S	TCT	0	0	0	0	0	0	4.40061e-05	0	3.29144e-05	0	0	0	0	0	0	0	0	0	0	0	0	0	0	0	0	0	0	0	0	0	0	0	0	0	0	0	0	0	0.00443999	0	0	0	0	0	0	0	0
74	W	TGG	0	0	0	0	0	0	0	0	0	0	0	0	0	0	0	0	0	0	0	0	0	0	0	0	0	0	0	0	0	0	0	0	0	0	0	0	0	0	0	0	0	0	0	0	0	0.000638939	0
75	S	AGT	0	0	0	0	0	0	0	0	0	0	0	0	0	0	0	0	0	0	0.000918397	0	0	0	0	0	0	0	0	0	0	0	0	0	0	0	0	0	0	0	0	0	0	0	0	0	0	0	0
76	E	GAG	0	0	0	0	0	0.000472894	0	0	0	0.000150333	0.0019191	0.00837033		0	0	0	0	0.00250397	0	0	0	0	0	0	0	0.000111342	0	0	0	0	0	0	0	0	0	0	0	0	0	0	0	0	0	0	0	0	0
77	G	GGG	0	0	0	0	0	6.25103e-05	0	0	0	0	0	0	5.21576e-05	0	0	0.0025023	0.00127033		0.000545637	0	0	0	0	0	0	0	0	0	0	0	0	0	0	0	0	0	0	0	0	0	0	0	5.90594e-05	0	0	0	0
78	G	GGA	0	0	0	0	0	0	0	0	0	0	0	4.38425e-05	0	0	0		0.000186173	0.00616407	0.00760127	0	0	0	0	0	0	0	0	0	0	0	0	0	0	0	0	0	0	0	0	0	0	5.07854e-05	0	0	0	0	0
79	S	TCT	0	0	0	0	0	0	0.000116211	0	0	0	0	0	0	0	0.0010758	0	0	0	0	0	0	0	0	0	0	0	0	0	0	0	0	0	0	0	7.93809e-05	0	0	0	0.00148849	0	0	0	0	0	0	0	0
80	L	CTT	0	0	0	0	0	0	0	0	0	0	0	0	0	0	0.000332625	0	0	0	0	0	0.00338271	0	0	0.000234015	0	0	0.00236262	0.00289987	1.29946e-05		0	0	0	0	0	0	0	0	0.000771266	0	0	0	0	0	0	0	0.00070326
81	R	AGA	0	0	0	0	0	0	0	0	0	0	0	0	0	0	0	0.00287979	0	0	0	0	0	0.000362588	0	0	0.00324744	0	0	0	0	0	0	0	0	0	0	0	0	0	0	0	0		0.00519496	0	0	0	0
82	G	GGA	0	0	0	0	0	0	0	0	0	0	0	0	0	0	0		0.000746861	0.0046944	0.00361448	0	0	0	0	0	0	0	0	0	0	0	0	0	0	0	0	0	0	0	0	0	0	0	0	0	0	0	0
83	I	ATT	0	0	0	0	0	0	0	0	0	0	0	0	0	0	0.00222751	0	0	0	0	0	0	0.00217352	0.00709323		0	0	0	0	0	0.000405391	0	0	0.000628094	0	0	0	0	0	0	0	0	0	0	0	0	0	0
84	D	GAT	0	0	0	0	0	0	0.000676708	0	0	0.00540053		0.00341765	0.000130506	0	0	0	0	0	0.00280193	0	0.00058402	0	0	0	0	0	0	0	0	0	0	0	0	0	0.0017327	0	0	0	0	0	0	0	0	0	0	0	0
85	D	GAT	0	0	0	0	0	0	0	0	0	0.00406141		0.0026174	0	0	0	0	0	0	0.000809946	0	0	0	0	0	0	0	0	0	0	0	0	0	0	0	1.16826e-05	0	0	0	0	0	0	0	0	0	0	0	0
86	P	CCT	0	0	0	0	0	0	0.0007161	0	0	0	0	0	0	0	0	0	0	0	0	0	0.00369981	0	0	0	0	0	0	0	0	0.00249479	0	0	0	0	0	0.00172242	0.00334407	0.000296266		0	0	0	0	0	0	0	0.000568677
87	R	CGG	0	0	0	0	0	0	0	0	0	0	0	0	0	0	0	0	0	0	0	0	0	0	0	0	0	0	0	0	0.00102	0	0	0	0	0	0	0	0	0	0	0	0.00218854	0	0.00200505	0.00576177	0.000659463		0.00259093
88	G	GGC	0	0	0	0	4.93686e-05	0	0	0	0	0.000420397	0	0	0	0	0	0.000629296		6.49581e-05	0.00387813	0	0	0	0	0	0	0	0	0	0	0	0	0	0	0	0	0	0	0	0	0	0	0	0	0	0	0	0
89	K	AAA	0	0	0	0	0	0	0	0	0	0	0	0.00274344	0	0	0	0	0	0	0	0	0	0.000813078	0	0		0.00372832	0	0	0	0	0	0	0	0	0.000248414	0	0	0	0	0	0	0.00477229	0	0	0	0	0
90	L	CTT	0	0	0	0	0	0	0	0	0	0	0	0	0	0	0.00033526	0	0	0	0	0	0.000259966	0	0	0	0	0	0.00158581	0.00149415	0.000505492		0	0	0	0	0	0	0	0	0.00135665	0	0	0	0	0	0	0	0
91	F	TTT	0	0	0	0	0	0	0	0	0	0	0	0	0	0.00399498		0	0	0	0	0	0	0	0	0.00100937	0	0	0	0	0	0.00127759	0.00106046	0.000498459	0	0	0	0	0	0	0	0	0	0	0	0	0	0	0
92	Y	TAT	0	0	0	0	0	0	0	0	0.00160772	0	0	0	0	0	0.00106755	0	0	0	0	0	0.00263249	0	0	0	0	0	0	0	0	0	0	0	0	0	0.00035145	0	0	0	0	0	0	0	0	0	0	0	0
93	E	GAA	0	0	0	0	0	0	0	0	0	0.000540803	0.00400732		0.00606288	0	0	0.000926962	0	0	0	0	0	0	0	0	0	0	0	0	0	0	0	0	0	0	0	0	0	0	0	0.000359606	0	0	0	0	0	0	0
94	Y	TAT	0	0	0	0	0	0	0	0	0.000696704	0	0	0	0	0	0.000524682	0	0	0	0	0	0.000459433	0	0	0	0	0	0	0	0	0	0	0	0	0	0	0	0	0	0	0	0	0	0	0	0	0	0
95	I	ATT	0	0	0	0	0	0	0	0	0	0	0	0	0	0	0.00117256	0	0	0	0	0	0	0.0013419	0.00401688		0	0	0	0	0	0	0	0	0	0	0.00182408	0	0	0	0	0	0	0	0	0	0	0	0
96	R	CGG	0	0	0	0	0	0	0	0	0	0	0	0	0	0	0	0	0	2.0536e-05	0	0	0	0	0	0	0	0	0	0	0	0	0	0	0	0	0	0	0	0	0	0	0.000167373	0	0.00210562	0.00227648	0.0011445		0.000437018
97	I	ATT	0	0	0	0	0	0	0	0	0	0	0	0	0	0	0.00277055	0	0	0	0	0	0	0.00317871	0.0046744		0	0	0	0	0	0.000311082	0	0	0.00172514	0	0	0	0	0	0	0	0	0	0	0	0	0	0
98	L	TTA	0	0	0	0	0	0	0	0	0	0	0	0	0	0	0.00147313	0	0	0	0	0	0	0.00224802	0	0	0	0	0.00372758	0	0	0		0.00195211	0	0	0	0	0	0	0	0	0	0	0	0	0	0	0
99	K	AAA	0	0	0	0	0	0	0	0	0	0	0	0.00316612	0	0	0	0	0	0	0	0	0	0.002101	0	0		0.00798254	0	0	0	0	0	0	0	0.00189191	0.00213051	0	0	0	0	0.00105801	0	0.00362119	0	0	0	0	0
100	Q	CAA	0	0	0	0	0	0	0	0	0	0	0	0.00144959	0	0	0	0	0	0	0	0.000498191	0.00294499	0	0	0	0.00034242	0	0.000979882	0	0	0	0	0	0	0	0	0	0	0	0		0.00612511	0	0	0.00421512	0	0.000389957	0
101	K	AAA	0	0	0	0	0	0	0	0	0	0	0	0.00111149	0	0	0	2.72077e-05	0	0	0	0	0	0.00330925	0	0		0.00332351	0	0	0	0	0	0	0	0.000952298	0.00140848	0	0	0	0	0.000971305	0	0.00261072	0	0	0	0	0
102	K	AAA	0	0	0	0	0	0	0	0	0	0	0	0.00663848	0	0	0	0	0	0	0	0	0	0.00101698	0	0		0.00324973	0	0	0	0	0	0	0	0.000637082	0.0010263	0	0	0	0	0.000870146	0	0.00258316	0	0	0	0	0
103	P	CCA	0	0	0	2.18484e-05	0	0	0	0	0	0	0	0	0	0	0	0	0	0	0	0	0	0	0	0	0	0	3.27161e-05	0	0	0	0	0	0	0	0		0.00170851	0.00406462	0.00148029	0	0	0	0	0	0	0	0
104	K	AAA	0	0	0	0	0	0	0	0	0	0	0	0.00342843	0	0	0	0	0	0	0	0	0	0.0028439	0	0		0.000779959	0	0	0	0	0	0	0	0.000682183	0.00209569	0	0	0	0	0.00107116	0	0.00290979	0	0	0	0	0
105	F	TTC	0	0	0	0	0	0	0	0	0	0	0	0	0		0.00165266	0	0	0	0	0	0	0	0	0	0	0	0	0.000874987	0	0	0	0	0	0	0	0	0	0	0	0	0	0	0	0	0	0	0
106	F	TTT	0	0	0	0	0	0	0	0	0.000764267	0	0	0	0	0.00348993		0	0	0	0	0	0	0	0	0	0	0	0	0	0	0.00195528	0	0	0	0	0	0	0	0	0	0	0	0	0	0	0	0	0
107	L	CTT	0	0	0	0	0	0	0	0	0	0	0	0	0	0	0.000489989	0	0	0	0	0	0	0	0	0.000435518	0	0	0.00145957	0.00514178	7.41966e-05		0	0	0	0	0	0	0	0	0.00088944	0	0	0	0	0	0	0	0
108	A	GCC	0	0	0	0.00253262		0.000524341	0.00427139	0	0	0	0	0	0	0	0	0	0	0	0	0	0	0	0	0	0	0	0	0	0	0	0	0	0	0	0	0	0	0	0	0	0	0	0	0	0	0	0
109	E	GAA	0	0	0	0	0	0	0	0	0	0	0		0.00432722	0	0	0.000197565	0	0	0	0	0	0	0	0	0.000208186	0	0	0	0	0	0	0	0	0	0	0	0	0	0	0	0	0	0	0	0	0	0
110	N	AAC	0	0	0	0	0	0	0	0	0	0.000714504	0	0	0	0	0	0	0	0	0	0	0	0	0	0	0	0	0	0	0	0	0	0	0		0.00391126	0	0	0	0	0	0	0	0	0	0	0	0
111	V	GTT	0	0	0	0	0	0	0.000663491	0	0	0	0	0	0	0	0	0	0	0	0	0	0	0	0	0	0	0	0	0	0	0	0	0	0	0	0	0	0	0	0	0	0	0	0	0	0	0	0
112	K	AAA	0	0	0	0	0	0	0	0	0	0	0	0.00253746	0	0	0	0	0	0	0	0	0	0.00115242	0	0		0.0047185	0	0	0	0	0	0	0	0.000236138	0.00021668	0	0	0	0	0	0	0.00393842	0	0	0	0	0
113	G	GGA	0	0	0	0	0	0	0	0	0	0	0	0	0	0	0		3.97649e-05	0.00493506	0.00120307	0	0	0	0	0	0	0	0	0	0	0	0	0	0	0	0	0	0	0	0	0	0	0	0	0	0	0	0
114	M	ATG	0	0	0	0	0	0	0	0	0	0	0	0	0	0	0	0	0	0	0	0	0	0.00469445	0.000597849	6.80686e-05	0	0	0	0	0	0	0	0.000772604		0	0	0	0	0	0	0	0	0	0	0	0	0	0
115	L	CTG	0	0	0	0	0	0	0	0	0	0	0	0	0	0	0	0	0	0	0	0	0	0	0	0	0	0	0.0035149	0		0.000401293	0	0.00677364	0.00249902	0	0	0	0	0.000889443	0	0	0.000789551	0	0	0	0	0.000160045	0
116	A	GCT	0	0	0	0.00115945	0.00381074	0.000408346		0	0	0	0.000628799	0	0	0	0	0	0	0	0.00107556	0	0	0	0	0	0	0	0	0	0	0	0	0	0	0	0	0	0	0	0	0	0	0	0	0	0	0	0
117	Q	CAG	0	9.8291e-05	0	0	0	0	0	0	0	0	0	0	0	0	0	0	0	0	0	0.000143208	0.00103338	0	0	0	0	0.00024325	0	0	0.00154992	0	0	0	0	0	0	0	0	0.000576042	0	0.00483088		0	0	0.000141458	0	0.00324246	0
118	R	CGT	0	0	0	0	0	0	0	0	0.00587162	0	0	0	0	0	0	0	0	0	0.000120189	0	0.002787	0	0	0	0	0	0	0	0	0	0	0	0	0	0	0	0	0	0.00118914	0	0	0	0	0.00202252	0.00546271	0.000591326
119	H	CAT	0	0	0	0	0	0	0	0	0	0	0	0	0	0	0	0	0	0	0	0.00624675		0	0	0	0	0	0	0	0	0	0	0	0	0	0.000626729	0	0	0	0	0	0	0	0	0	0	0	0.000748007
120	N	AAT	0	0	0	0	0	0	0	0	0	0	0.0078215	0	0	0	0	0	0	0	0	0	0.000336238	0	0	0.00712101	0.00377962	0.000102743	0	0	0	0	0	0	0	0.0050947		0	0	0	0	0	0	0	0	0	0	0	0
121	K	AAG	0	0.000245202	0	0	0	0	0	0	0	0	0	0	0.00318316	0	0	0	0	0	0	0	0	0	0	0	0.0021164		0	0	0	0	0	0	0.00509516	4.40923e-05	0.00258857	0	0	0	0	0	0.000227714	0	0.00523797	0	0	0	0
122	A	GCT	0	0	0	0.00219529	0.00716275	0.000676092		0	0	0	0.000754167	0	0	0	0	0	0	0	3.84866e-05	0	0	0	0	0	0	0	0	0	0	0	0	0	0	0	0	0	0	0	0.000598018	0	0	0	0	0	0	0	0
123	V	GTT	0	0	0	0	0	0	0.00314798	0	0	0	0	0	0	0	0.00018839	0	0	0.000275007	0.00610757	0	0	0	0	0.00744695	0	0	0	0	0	0.00173515	0	0	0	0	0	0	0	0	0	0	0	0	0	0	0	0	0
124	Q	CAA	0.000219567	0	0	0	0	0	0	0	0	0	0	0.0002998	0	0	0	0	0	0	0	0.000409592	0.00149907	0	0	0	0.000671404	0	0.00195935	0	0	0	0	0	0	0	0	0	0	0	0		0.00501242	0	0	0.00653684	0	0	0
125	E	GAA	0	0	0	0.000800275	0	0	0	0	0	0.000969206	0.00507711		0.00429014	0	0	0.0048917	0	0	0	0	0	0	0	0	0.00241542	0	0	0	0	0	8.57315e-05	0	0	0	0	0	0	0	0	9.44385e-07	0	0	0	7.7491e-05	0	0	0
126	F	TTT	0	0	0	0	0	0	0	0	0.000145779	0	0	0	0	0.00241316		0	0	0	0	0	0	0	0	0.00411698	0	0	0	0	0	0.00257481	0.000573917	0.000233154	0	0	0	0	0	0	0	0	0	0	0	0	0	0	0
127	I	ATC	0	0	0	0	0	0	0	0	0	0	0	0	0	0.000928683	0	0	0	0	0	0	0	0.001664		0.00319292	0	0	0	0	0	0	0	0	0.000453417	0.00287458	0	0	0	0	0	0	0	0	0	0	0	0	0
128	Q	CAA	9.76381e-05	0	0	0	0	0	0	0	0	0	0	0.00146568	0	0	0	0	0	0	0	0.000906449	0.002806	0	0	0	0.000892584	0	0.00181232	0	0	0	0.00015613	0	0	0	0	0	0	0	0		0.00460849	0	0	0.00497823	0	0	0
129	E	GAA	0	0	0	0.00106785	0	0	0	0	0	0.00128258	0.00481149		0.00452675	0	0	0.00469013	0	0	0	0	0	0	0	0	0.000563723	0	0	0	0	0	0	0	0	0	0	0	0	0	0	0	0	0	0	0	0	0	0
130	F	TTT	0	0	0	0	0	0	0	0	0.000323218	0	0	0	0	0.00487898		0	0	0	0	0	0	0	0	0.000886458	0	0	0	0	0	0.00103599	0.000637237	3.41216e-05	0	0	0	0	0	0	0	0	0	0	0	0	0	0	0
131	D	GAT	0	0	0	0	0	0	0.000225444	0	0	0.00273618		0.00441321	0.000442302	0	0	0	0	0	0.0035506	0	0.000919389	0	0	0	0	0	0	0	0	0	0	0	0	0	0.00153623	0	0	0	0	0	0	0	0	0	0	0	0
132	N	AAT	0	0	0	0	0	0	0	0	0	0	0.0048676	0	0	0	0	0	0	0	0	0	0.000151596	0	0	0.00546791	0.00324918	0.000439743	0	0	0	0	0	0	0	0.00217343		0	0	0	0	0	0	0	0	0	0	0	0
133	A	GCT	0	0	0	0.00152596	0.00374371	0.00106951		0	0	0	0.00197745	0	0	0	0	0	0	0	0.0020866	0	0	0	0	0	0	0	0	0	0	0	0	0	0	0	0	0	0	0	0	0	0	0	0	0	0	0	0
134	G	GGA	0	0	0	2.88215e-05	0	0	0	0	0	0	0	0.00278448	0	0	0		0.000640628	0.00415978	0.00538339	0	0	0	0	0	0	0	0	0	0	0	0	0	0	0	0	0	0	0	0	0	0	0.00352269	0	0.00118165	0	0	0
135	Y	TAT	0	0	0	0	0	0	0	0	0.000644806	0	0	0	0	0	0.0017636	0	0	0	0	0	0.00038094	0	0	0	0	0	0	0	0	0	0	0	0	0	0	0	0	0	0	0	0	0	0	0	0	0	0
136	D	GAT	0	0	0	0	0	0	0.000221084	0	0	0.00240894		0.00235411	0.000237534	0	0	0	0	0	0.00616504	0	0.000555569	0	0	0	0	0	0	0	0	0	0	0	0	0	0.00310533	0	0	0	0	0	0	0	0	0	0	0	0
137	V	GTC	0	0	0	0	0.00544187	0	0	0	0	0	0	0	0	0	0	0	0.000118657	0	0	0	0	0	0.00263519	0	0	0	0	0.0010784	0	0	0	0	0	0	0	0	0	0	0	0	0	0	0	0	0	0	0
138	H	CAT	0	0	0	0	0	0	0	0	0	0	0.000138093	0	0	0	0	0	0	0	0	0.00565377		0	0	0	0	0	0	0	0	0.00263262	0	0	0	0	0.000792213	0	0	0	0	0.00329228	0.000221244	0	0	0	0	0	0.00647973
139	I	ATT	0	0	0	0	0	0	0	0	0	0	0	0	0	0	0.00275552	0	0	0	0	0	0	0.000442639	0.00366893		0	0	0	0	0	0.000282393	0	0	0.000255685	0	0.00291577	0	0	0	0	0	0	0	0	0	0	0	0
140	I	ATT	0	0	0	0	0	0	0	0	0	0	0	0	0	0	0.00355966	0	0	0	0	0	0	0.00264436	0.0032393		0	0	0	0	0	0	0	0	0.0025986	0	0.00712422	0	0	0	0	0	0	0	0	0	0	0	0
141	L	TTG	0	0	0	0	0	0	0	0	0	0	0	0	0	0.000459384	0	0	0	0	0	0	0	0	0	0	0	0	0	0	0.0036749	0	0.00551588		0.0021912	0	0	0	0	0	0	0	0	0	0	0	0	0	0
142	L	CTT	0	0	0	0	0	0	0	0	0	0	0	0	0	0	0.00367033	0	0	0	0	0	0.00150393	0	5.21995e-05	0.000792783	0	0	0.0020314	0.00329827	0.000208798		0	0	0	0	0	0	0	0	0.00176766	0	0	0	0	0	0	0	0.000990585
143	N	AAT	0	0	0	0	0	0	0	0	0	0	0.00196301	0	0	0	0	0	0	0	0	0	0	0	0	0	0	0	0	0	0	0	0	0	0	0.0044275		0	0	0	0	0	0	0	0	0	0	0	0
144	A	GCG	0	0	0	0.00438698	0.00143061		0.00208119	0	0	0	0	0	0	0	0	0	0	0.000386149	0	0	0	0	0	0	0	0	0	0	0	0	0	0	0	0	0	0	0	0	0	0	0	0	0	0	0	0	0
145	N	AAT	0	0	0	0	0	0	0	0	0	0	0.00118247	0	0	0	0	0	0	0	0	0	7.82598e-05	0	0	0.00210622	0.00171524	0.000512209	0	0	0	0	0	0	0	0.00475288		0	0	0	0	0	0	3.67511e-05	0	0	0	0	0
146	D	GAT	0	0	0	0	0	0	0	0	0	0.0045598		0.00304642	0.00065864	0	0	0	0	0	0.00178106	0	2.84141e-06	0	0	0	0	0	0	0	0	0	0	0	0	0	0.00175584	0	0	0	0	0	0	0	0	0	0	0	0
147	Y	TAT	0	0	0	0	0	0	0	0	0.00115159	0	0	0	0	0	0.00341385	0	0	0	0	0	0.00210433	0	0	0	0	0	0	0	0	0	0	0	0	0	0	0	0	0	0	0	0	0	0	0	0	0	0
148	G	GGT	0	0	0	0	0	0	0.00170197	0	0.000693063	0	0.00529322	0	0	0	0	0.00289906	0.00600587	0.00121353		0	0	0	0	0	0	0	0	0	0	0	0	0	0	0	0	0	0	0	0	0	0	0	0	0	0	0	0.000440835
149	V	GTA	0	0	0	0.0029339	0	0	0	0	0	0	0	0.000625199	0	0	0	0.000147135	0	0	0	0	0	0.00528923	0	0	0	0	0.000539691	0	0	0	0.000174342	0	0	0	0	0	0	0	0	0	0	0	0	0	0	0	0
150	A	GCT	0	0	0	0.00191943	0.00426461	0.000857017		0	0	0	0	0	0	0	0	0	0	0	0.000203829	0	0	0	0	0	0	0	0	0	0	0	0	0	0	0	0	0	0	0	0.00114426	0	0	0	0	0	0	0	0
151	Q	CAA	1.25553e-05	0	0	0	0	0	0	0	0	0	0	0	0	0	0	0	0	0	0	0	0	0	0	0	0	0	0	0	0	0	0	0	0	0	0	0	0	0	0		0.0060745	0	0	0.000637335	0	0	0
152	D	GAT	0	0	0	0	0	0	0	0	0	0.00450256		0.00294884	3.51222e-05	0	0	0	0	0	0.00203276	0	0.000846283	0	0	0	0	0	0	0	0	0	0	0	0	0	0.00235964	0	0	0	0	0	0	0	0	0	0	0	0
153	R	AGA	0	0	0	0	0	0	0	0	0	0	0	0	0	0	0	0.000676092	0	0	0	0	0	0	0	0	0	0	0	0	0	0	0	0	0	0	0	0	0	0	0	0	0		0.00435615	0.000123067	0	0	0
154	K	AAA	0	0	0	0	0	0	0	0	0	0	0	0.00390723	0	0	0	0	0	0	0	0	0	0.00195142	0	0		0.00550101	0	0	0	0	0	0	0	0.000420069	0.00119823	0	0	0	0	0.000615649	0	0.00447317	0	1.65897e-05	0	0	0
155	R	CGT	0	0	0	0	0	0	0	0	0	0	0	0	0	0	0	0	0	0	0	0	7.01796e-05	0	0	0	0	0	0	0	0	0	0	0	0	0	0	0	0	0	0	0	0	0	0	5.74205e-05	0.00297501	0.000316856
156	V	GTT	0	0	0	0	0	0	0.00177334	0	0	0	0	0	0	0	0	0	0	0	0.000736751	0	0	0	0	0.00132601	0	0	0	0	0	0.000168995	0	0	0	0	0	0	0	0	0	0	0	0	0	0	0	0	0
157	F	TTT	0	0	0	0	0	0	0	0	0.000443387	0	0	0	0	0.00195143		0	0	0	0	0	0	0	0	0.000655118	0	0	0	0	0	0.00127303	0.000560055	0.000261902	0	0	0	0	0	0	0	0	0	0	0	0	0	0	0
158	Y	TAT	0	0	0	0	0	0	0	0	0.000908335	0	0	0	0	0	0.0019215	0	0	0	0	0	0.000327566	0	0	0	0	0	0	0	0	0	0	0	0	0	0	0	0	0	0	0	0	0	0	0	0	0	0
159	I	ATT	0	0	0	0	0	0	0	0	0	0	0	0	0	0	4.85623e-06	0	0	0	0	0	0	0.00133214	0.00391575		0	0	0	0	0	0	0	0	0.000576674	0	0	0	0	0	0	0	0	0	0	0	0	0	0
160	G	GGT	0	0	0	0	0	0	0.000661664	0	0	0	0	0	0	0	0	0.00132217	0.00497168	0.000373214		0	0	0	0	0	0	0	0	0	0	0	0	0	0	0	0	0	0	0	0	0	0	0	0	0	0	0	0
161	F	TTT	0	0	0	0	0	0	0	0	0	0	0	0	0	0.00255203		0	0	0	0	0	0	0	0	0	0	0	0	0	0	0.00105654	0	5.66482e-05	0	0	0	0	0	0	0	0	0	0	0	0	0	0	0
162	R	AGA	0	0	0	0	0	0	0	0	0	0	0	0	0	0	0	0.00387729	0	0	0	0	0	0.00099206	0	0	0.00164231	0	0	0	0	0	0	0	0	0	0	0	0	0	0	0	0		0.00443281	0.000169554	0	0	0
163	K	AAA	0	0	0	0	0	0	0	0	0	0	0	0.00641733	0	0	0	0	0	0	0	0	0	0.00120964	0	0		0.0134009	0	0	0	0	0	0	0	0.0011608	0.00255041	0	0	0	0	0.000792314	0	0.00418419	0	0	0	0	0
164	E	GAG	0	0	0	0	0	0.000347645	0	0	0	0.000282897	9.79028e-05	0.00112		0	0	0	0	0.00286819	0	0	0	0	0	0	0	0.00307168	0	0	0	0	0	0	0	0	0	0	0	0	0	0	0.000236648	0	0	0	0	0	0
165	L	TTA	2.42291e-06	0	0	0	0	0	0	0	0	0	0	0	0	0	0.000728816	0	0	0	0	0	0	0.000689815	0	0	0	0	0.00226936	0	0	0		0.00313225	7.61701e-05	0	0	0	0	0	0	0	0	0	0	0	0	0	0
166	N	AAT	0	0	0	0	0	0	0	0	0	0	0.00320354	0	0	0	0	0	0	0	0	0	0.000247407	6.31304e-05	0	0.00336208	0.000948081	0	0	0	0	0	0	0	0	0.00134189		0	0	0	0	0	0	0	0	0	0	0	0
167	I	ATA	0	0	0	0	0	0	0	0	0	0	0	0	0	0	0	0	0	0	0	0	0		3.2181e-06	0.000370072	0.0012686	0	2.98017e-05	0	0	0	0.00119416	0	0.00275196	0	0	0	0	0	0	0	0	8.82856e-05	0	0	0	0	0
168	N	AAT	0	0	0	0	0	0	0	0	0	0	0.00242602	0	0	0	0	0	0	0	0	0	0.000571314	0	0	0.000902912	0.00351074	0.00132444	0	0	0	0	0	0	0	0.00271265		0	0	0	0	0	0	0	0	0	0	0	0
169	Y	TAT	0	0	0	0	0	0	0	0	0.000438064	0	0	0	0	0	0.000691901	0	0	0	0	0	0.000680094	0	0	0	0	0	0	0	0	0	0	0	0	0	0	0	0	0	0	0	0	0	0	0	0	0	0
170	L	CTT	0	0	0	0	0	0	0	0	0	0	0	0	0	0	0.00180713	0	0	0	0	0	0.00409946	0	0	0.00124486	0	0	0.00184421	0.00332711	0		0	0	0	0	0	0	0	0	0.00514986	0	0	0	0	0	0	0	0.00118925
171	P	CCA	0	0	0	0.00106734	0	0	0	0	0	0	0	0	0	0	0	0	0	0	0	0	0	0	0	0	0	0	0.00134997	0	0	0	0	0	0	0	0		0.00029173	0.00447212	0.0016589	0.00114621	0	0	0	0.000219427	0	0	0
172	P	CCC	0	0	0	0	0.000555378	0	0	0	0	0	0	0	0	0	0	0	0	0	0	1.85292e-05	0	0	0	0	0	0	0	0.000386833	0	0	0	0	0	0	0	0.00124205		0.00224708	0.0043695	0	0	0	0	0	0	0	0
173	I	ATT	0	0	0	0	0	0	8.83493e-05	0	0	0	0	0	0	0	0.00204527	0	0	0	0	0	0	0.00171212	0.00434464		0	0	2.30261e-05	0	0	0.000810659	0	0	0.000216218	0	0.00418787	0	0	0	0	0	0	0	0	0	0	0	0
174	P	CCA	0	0	0	0.00101308	0	0	0	0	0	0	0	0	0	0	0	0	0	0	0	0	0	0	0	0	0	0	0.000645737	0	0	0	0	0	0	0	0		0.000298801	0.00508788	0.00302667	0.00146206	0	0	0	0.000319209	0	0	0
175	H	CAT	0	0	0	0	0	0	0	0	0	0	0.00194326	0	0	0	0	0	0	0	0	0.0043359		0	0	0	0	0	0	0	0	0.00426793	0	0	0	0	0.000590607	0	0	0	0	0.00564097	0.00137909	0	0	0	0	0	0.00493406
176	L	TTG	0	0.00263216	0	0	0	0	0	0	0	0	0	0	0	0.000482031	0	0	0	0	0	0	0	0	0	0	0	0	0	0	0.00607642	0	0.00345447		0.00310398	0	0	0	0	0	0	0	5.92401e-06	0	0	0	0	0	0
177	I	ATA	0	0	0	0	0	0	0	0	0	0	0	0	0	0	0	0	0	0	0	0	0		2.50063e-05	0.000508953	0.00251103	0	0	0	0	0	0.00135089	0	0.00306791	0	3.77413e-05	0	0	0	0	0	0	0.000204	0	0	0	0	0
178	K	AAG	0	0	0	0	0	0	0	0	0	0	0	0	0.00151372	0	0	0	0	0	0	0	0	0	0	0	0.00506199		0	0	0	0	0	0	0.00233508	0.000508381	0.00140202	0	0	0	0	0	0.00272276	1.04625e-05	0.00652072	0	0	0	0
179	P	CCA	0	0	0	0.00044793	0	0	0	0	0	0	0	0	0	0	0	0	0	0	0	0	0	0	0	0	0	0	0.0025623	0	0	0	0	0	0	0	0		0.000686441	0.00559848	0.00138264	0.000415699	0	0	0	0.000267435	0	0	0
180	T	ACA	0	0	0	0.00519505	0	0	0	0	0	0	0	0	0	0	0	0	0	0	0	0	0	0.00458872	0	0	0.000293866	0	0	0	0	0	0	0	0	0	0	0.00264972	0	0	0	0	0	0.000919146	0	0	0	0	0
181	L	TTG	0	0	0	0	0	0	0	0	0	0	0	0	0	0.000770661	0.00017874	0	0	0	0	0	0	0	0	0	0	0	0	0	0.00605387	0	0.00200488		0.00497708	0	0	0	0	0	0	0	0	0	0	0	0	0	0
182	K	AAG	0	0.000578723	0	0	0	0	0	0	0	0	0	0	0.00514234	0	0	0	0	0	0	0	0	0	0	0	0.0020979		0	0	0	0	0	0	0.00250667	0.000182152	0.00192706	0	0	0	0	0	0.000725149	0	0.003794	0	0	0	0
183	D	GAC	0	0	0	0	0	0	0	0	0		0.00768443	0.000528941	0.000610652	0	0	0	0.00163787	0	0	0	0	0	0	0	0	0	0	0	0	0	0	0	0	0.00154448	0	0	0	0	0	0	0	0	0	0	0	0	0
184	V	GTC	0	0	0	0	0.00405878	0	0	0	0	0.00026204	0	0	0	0	0	0	0	0	0	0	0	0	0.00513889	0	0	0	0	0.000431147	0	0	0	0	0	0	0	0	0	0	0	0	0	0	0	0	0	0	0
185	I	ATT	0	0	0	0	0	0	0	0	0	0	0	0	0	0	0.00068823	0	0	0	0	0	0	0.00458267	0.00498211		0	0	0	0	0	0.000267777	0	0	0.000998314	0	0	0	0	0	0	0	0	0	0	0	0	0	0
186	W	TGG	0	2.63098e-05	0.00012823	0	0	0	0	0	0	0	0	0	0	0	0	0	0	0.000326974	0	0	0	0	0	0	0	0	0	0	0	0	0	0.000123134	0	0	0	0	0	0	0	0	0	0	6.70779e-05	0	0	0.00133598	0
187	D	GAT	0	0	0	0	0	0	0	0	0	0.00392191		0.00283802	0.000140652	0	0	0	0	0	0.00166009	0	4.16666e-05	0	0	0	0	0	0	0	0	0	0	0	0	0	0.00163039	0	0	0	0	0	0	0	0	0	0	0	0
188	L	CTT	0	0	0	0	0	0	0	0	0	0	0	0	0	0	5.01385e-05	0	0	0	0	0	0	0	0	0.00124102	0	0	0.00143059	0.00275757	0		0	0	0	0	0	0	0	0	0.000701478	0	0	0	0	0	0	0	0
189	K	AAG	0	9.66223e-05	0	0	0	0	0	0	0	0	0	0	0.000446437	0	0	0	0	6.49673e-05	0	0	0	0	0	0	0.0023401		0	0	0	0	0	0	0.00116006	0.000129272	0.00187835	0	0	0	0	0	0	0	0.00241939	0	0	0	0
190	D	GAT	0	0	0	0	0	0	0.000261704	0	0	0.00257177		0.00359441	0	0	0	0	0	0	0.00382268	0	0.000111047	0	0	0	0	0	0	0	0	0	0	0	0	0	0.00168153	0	0	0	0	0	0	0	0	0	0	0	0
191	N	AAT	0	0	0	0	0	0	0	0	0	0	0.00264068	0	0	0	0	0	0	0	0	0	0	0	0	0.00427231	0.00179797	0.000224617	0	0	0	0	0	0	0	0.00469815		0	0	0	0	0	0	0	0	0	0	0	0
192	P	CCA	0	0	0	0.00248909	0	0	0	0	0	0	0	0	0	0	0	0	0	0	0	0	0	0	0	0	0	0	0.000169456	0	0	0	0	0	0	0	0		0.000267783	0.00460313	0.00261871	0.000410805	0	0	0	0	0	0	0
193	I	ATT	0	0	0	0	0	0	0	0	0	0	0	0	0	0	0.00205288	0	0	0	0	0	0	0.00162471	0.00376559		0	0	0	0	0	0.000552012	0	0	6.07351e-05	0	0.000308627	0	0	0	0	0	0	0	0	0	0	0	0
194	P	CCA	0	0	0	0.000401166	0	0	0	0	0	0	0	0	0	0	0	0	0	0	0	0	0	0	0	0	0	0	0.000182672	0	0	0	0	0	0	0	0		0.00119776	0.00439778	0.00270445	0.000437581	0	0	0	0.000105289	0	0	0
195	A	GCT	0	0	0	0.00358819	0.00401447	0.000932154		0	0	0	0	0	0	0	0	0	0	0	0.00155049	0	0	0	0	0	0	0	0	0	0	0	0	0	0	0	0	0	0	0	0.00029508	0	0	0	0	0	0	0	0
196	L	TTA	0	0	0	0	0	0	0	0	0	0	0	0	0	0.000302915	0.00118052	0	0	0	0	0	0	0.0017254	0	0	0	0	0.00302252	0	0	0		0.00319611	0	0	0	0	0	0	0	0	0	0	0	0	0	0	0
197	D	GAT	0	0	0	0	0	0	2.7759e-06	0	0	0.00116193		0.00226979	0.000233581	0	0	0	0	0	0.00405468	0	0.000428482	0	0	0	0	0	0	0	0	0	0	0	0	0	0.00232621	0	0	0	0	0	0	0	0	0	0	0	0
198	K	AAA	0	0	0	0	0	0	0	0	0	0	0	0.00156344	0	0	0	0	0	0	0	0	0	0.00144428	0	0		0.00464543	0	0	0	0	0	0	0	0.00183427	0.00255466	0	0	0	0	0	0	0.00311798	0	0	0	0	0
199	N	AAT	0	0	0	0	0	0	0	0	0	0	0.00159729	0	0	0	0	0	0	0	0	0	0.000122375	0	0	0	0	0	0	0	0	0	0	0	0	0.0028414		0	0	0	0	0	0	0	0	0	0	0	0
200	K	AAA	0	0	0	0	0	0	0	0	0	0	0	0.00103583	0	0	0	0	0	0	0	0	0	0.00313893	0	0		0.00241837	0	0	0	0	0	0	0	0.000672626	0.000315276	0	0	0	0	4.57988e-05	0	0.00253553	0	0	0	0	0
201	T	ACA	0	0	0	0.00379733	0	0	0	0	0	0	0	0	0	0	0	0	0	0	0	0	0	0	0	0	0	0	0	0	0	0	0	0	0	0	0	7.15277e-05	0	0	0	0	0	0	0	0	0	0	0
202	N	AAT	0	0	0	0	0	0	0	0	0	0	0.00045184	0	0	0	0	0	0	0	0	0	0.000751179	0	0	0	0.000458492	0	0	0	0	0	0	0	0	0.00311929		0	0	0	0	0	0	0	0	0	0	0	0
203	G	GGT	0	0	0	0	3.78405e-05	0	0.00048271	0	0.000517959	0	0.001935	0	0	0	0	0.000778807	0.00436723	0		0	0	0	0	0	0	0	0	0	0	0	0	0	0	0	0	0	0	0	0	0	0	0	0	0	0	0	3.31305e-06
204	N	AAT	0	0	0	0	0	0	0	0	0	0	0.00228524	0	0	0	0	0	0	0	0	0	0	0	0	0.00342381	0.00065256	0	0	0	0	0	0	0	0	0.00139729		0	0	0	0	0	0	0	0	0	0	0	0
205	K	AAA	0	0	0	0	0	0	0	0	0	0	0	0.00259305	0	0	0	0	0	0	0	0	0	0.00178865	0	0		0.00241593	0	0	0	0	0	0	0	0.00099901	0.00255615	0	0	0	0	0	0	0.00265209	0	0	0	0	0
206	C	TGT	0	0	0	0	0	0	0	0.0029593		0	0	0	0	0	3.8377e-05	0	0	0	0	0	0	0	0	0	0	0	0	0	0	0	0	0	0	0	0	0	0	0	0	0	0	0	0	0	0	0	0.00120674
207	I	ATT	0	0	0	0	0	0	0	0	0	0	0	0	0	0	0.00215619	0	0	0	0	0	0	0.00112773	0.00345327		0	0	0	0	0	0.00028347	0	0	0.00028347	0	0.00130425	0	0	0	0	0	0	0	0	0	0	0	0
208	Y	TAT	0	0	0	0	0	0	0	0	0.00160564	0	0.000300631	0	0	0	0.000756985	0	0	0	0	0	0.00314284	0	0	0	0	0	0	0	0	0	0	0	0	0	0.000516799	0	0	0	0	0	0	0	0	0	0	0	0
209	P	CCT	0	0	0	0	0	0	0.000196887	0	0	0	0	0	0	0	0	0	0	0	0	0	0.00209271	0	0	0	0	0	0	0	0	0.00145525	0	0	0	0	0	0.00263082	0.00425345	0.000379018		0	0	0	0	0	0	0	0.000486641
210	N	AAT	0	0	0	0	0	0	0	0	0	0	0.000567125	0	0	0	0	0	0	0	0	0	0	0	0	0	0	0	0	0	0	0	0	0	0	0.00463583		0	0	0	0	0	0	0	0	0	0	0	0
211	H	CAC	0	0	0	0	0	0	0	0	0	0	0	0	0	0	0	0	0	0	0		0.00550266	0	0	0	0	0	0	0	0	0	0	0	0	0	0	0	8.71728e-06	0	0	0	0	0	0	0	0.000634392	0	0
212	E	GAA	0	0	0	0	0	0	0	0	0	0	0		0.00210693	0	0	0.000707844	0	0	0	0	0	0	0	0	0.000158201	0	0	0	0	0	0	0	0	0	0	0	0	0	0	0	0	0	0	0	0	0	0
213	Y	TAT	0	0	0	0	0	0	0	0	0.000300566	0	0	0	0	0	0.000560199	0	0	0	0	0	0.000754923	0	0	0	0	0	0	0	0	0	0	0	0	0	0	0	0	0	0	0	0	0	0	0	0	0	0
214	F	TTT	0	0	0	0	0	0	0	0	0.00070406	0	0	0	0	0.00258353		0	0	0	0	0	0	0	0	0	0	0	0	0	0	0.00130791	0	0	0	0	0	0	0	0	0	0	0	0	0	0	0	0	0
215	I	ATA	0	0	0	0	0	0	0	0	0	0	0	0	0	0	0	0	0	0	0	0	0		0.000374949	0.00129911	0.00152648	0	0.000125572	0	0	0	0.00246531	0	0.00215726	0	0	0	0	0	0	0	0	0	0	0	0	0	0
216	G	GGA	0	0	0.000459371	0.000529023	0	0	0	0	0	0	0	0.00156684	0	0	0		0.000703153	0.00579471	0.009939	0	0	0	0	0	0	0	0	0	0	0	0	0	0	0	0	0	0	0	0	0	0	0	0	0	0	0	0
217	S	TCA	0	0	0	0.000307916	0	0	0	0	0	0	0	0	0	0	0	0	0	0	0	0	0	0	0	0	0	0	0	0	0	0	0.00102442	0	0	0	0	0.00574569	0	0	0	0	0	0	0	0	0	0	0
218	Y	TAT	0	0	0	0	0	0	0	0	0.00128733	0	0	0	0	0	0.00230336	0	0	0	0	0	0.00143162	0	0	0	0	0	0	0	0	0	0	0	0	0	0	0	0	0	0	0	0	0	0	0	0	0	0
219	S	TCA	0	0	0	0	0	0	0	0	0	0	0	0	0	0	0	0	0	0	0	0	0	0	0	0	0	0	0	0	0	0	0	0	0	0	0	0.00100765	0	0	0	0	0	0	0	0	0	0	0
220	T	ACA	0	0	0	0.00457665	0	0	0	0	0	0	0	0	0	0	0	0	0	0	0	0	0	0.00136186	0	0	0	0	0	0	0	0	0	0	0	0	0	0.0014759	0	0	0	0	0	0.000438698	0	0	0	0	0
221	I	ATT	0	0	0	0	0	0	0	0	0	0	0	0	0	0	0.00235799	0	0	0	0	0	0	0.00211347	0.00267161		0	0	0	0	0	9.88385e-05	0	0	0.000593193	0	0.000284886	0	0	0	0	0	0	0	0	0	0	0	0
222	F	TTT	0	0	0	0	0	0	0	0	0	0	0	0	0	0.00361429		0	0	0	0	0	0	0	0	0	0	0	0	0	0	0.000634811	0	0	0	0	0	0	0	0	0	0	0	0	0	0	0	0	0
223	M	ATG	0	0	0	0	0	0	0	0	0	0	0	0	0	0	0	0	0	0	0	0	0	0.00135686	0.000170309	0.000255382	0	0.000465828	0	0	0	0	0	0.000918061		0	5.63736e-06	0	0	0	0	0	0	0	0	0	0	0	0
224	S	AGT	0	0	0	0	0	0	0	0	3.84731e-05	0	0	0	0	0	0	0	0	0	0.00277454	0	0	0	0	0	0	0	0	0	0	0	0	0	0	0	8.87117e-06	0	0	0	0	0	0	0	0	0	0	0	0
225	R	AGA	0	0	0	0	0	0	0	0	0	0	0	0	0	0	0	0.000570364	0	0	0	0	0	0	0	0	7.42325e-05	0	0	0	0	0	0	0	0	0	0	0	0	0	0	0	0		0.00411416	0.000212047	0	0	0
226	N	AAT	0	0	0	0	0	0	0	0	0	0	0.00107992	0	0	0	0	0	0	0	0	0	0	0	0	0	0	0	0	0	0	0	0	0	0	0.00229049		0	0	0	0	0	0	0	0	0	0	0	0
227	R	CGT	0	0	0	0	0	0	0	0	0.000142422	0	0	0	0	0	0	0	0	0	0	0	0.000210187	0	0	0	0	0	0	0	0	0	0	0	0	0	0	0	0	0	0	0	0	0	0	0.00211118	0.00456499	0.000431316
228	V	GTT	0	0	0	0	0	0	0.00273053	0	0	0	0	0	0	0	0	0	0	0	0	0	0	0	0	0.00232755	0	0	0	0	0	0.00115409	0	0	0	0	0	0	0	0	0	0	0	0	0	0	0	0	0
229	R	AGA	0	0	0	0	0	0	0	0	0	0	0	0	0	0	0	0.000896851	0	0	0	0	0	7.11055e-05	0	0	0.000967813	0	0	0	0	0	0	0	0	0	0	0	0	0	0	0	0		0.00534168	0.000248512	0	0	0
230	Q	CAA	1.61942e-05	0	0	0	0	0	0	0	0	0	5.33303e-05	0.00182476	0	0	0	0	0	0	0	0.000857895	0.00262265	0	0	0	0.000491802	0	0.0015275	0	0	0	0	0	0	0	0	0.000447996	0	0	0		0.00729425	0	0	0.00512272	0	0	0
231	W	TGG	0	7.7386e-05	7.12523e-05	0	0	0	0	7.15127e-07	0	0	0	0	0	0	0	0	0	0	0	0	0	0	0	0	0	0	0	0	0	0	0	0	0	0	0	0	0	0	0	0	0	0	0	0	0	0.000632483	0
232	N	AAT	0	0	0	0	0	0	0	0	0	0	0.00508802	0	0	0	0	0	0	0	0	0	0.000217104	0	9.73543e-05	0.00213409	0.00186331	0.000146333	0	0	0	0	0	0	0	0.00426031		0	0	0	0	0	0	0	0	0	0	0	0
233	E	GAA	0	0	0	0	0	0	0	0	0	3.646e-05	0.00155896		0.00653918	0	0	0.00144584	0	0	0	0	0	0	0	0	0.00101477	0	0	0	0	0	0	0	0	0	0	0	0	0	0	5.88776e-06	0	0	0	0	0	0	0
234	P	CCA	0	0	0	0.00314471	0	0	0	0	0	0	0	0	0	0	0	0	0	0	0	0	0	0	0	0	0	0	0.00040487	0	0	0	0	0	0	0	0		0.000638759	0.00496722	0.00237318	0.000499033	0	0	0	8.79668e-07	0	0	0
235	A	GCA	0	0	0		0.000226155	0.00500648	0.00498482	0	0	0	0	0	0	0	0	0.000219967	0	0	0	0	0	0	0	0	0	0	0	0	0	0	0	0	0	0	0	0	0	0	0	0	0	0	0	0	0	0	0
236	F	TTC	0	0	0	0	0	0	0	0	0	0	0	0	0		0.00368555	0	0	0	0	0	0	0	0	0	0	0	0	0.000959711	0	0	0	0	0	0	0	0	0	0	0	0	0	0	0	0	0	0	0
237	T	ACA	0	0	0	0.00268878	0	0	0	0	0	0	0	0	0	0	0	0	0	0	0	0	0	0	0	0	0	0	0	0	0	0	0	0	0	0	0	0	0	0	0	0	0	0	0	0	0	0	0
238	V	GTT	0	0	0	0	0	0	0.00121731	0	0	0	0	0	0	0	0	0	0	0	0	0	0	0	0	0.00447379	0	0	0	0	0	0.00065489	0	0	0	0	0	0	0	0	0	0	0	0	0	0	0	0	0
239	Q	CAA	2.15563e-06	0	0	0	0	0	0	0	0	0	0	0	0	0	0	0	0	0	0	0	0	0	0	0	0	0	0.00240778	0	0	0	0	0	0	0	0	0	0	0	0		0.0041408	0	0	0.000969898	0	0	0
240	A	GCA	0	0	0		0.000522039	0.00381303	0.00449851	0	0	0	0	0	0	0	0	0.000109353	0	0	0	0	0	0	0	0	0	0	0	0	0	0	0	0	0	0	0	0	0	0	0	0	0	0	0	0	0	0	0
241	S	TCT	0	0	0	0	0	0	8.33976e-05	0	7.9816e-05	0	0	0	0	0	0	0	0	0	0	0	0	0	0	0	0	0	0	0	0	0	0	0	0	0	0	0	0	0	0.000878515	0	0	0	0	0	0	0	0
242	G	GGA	0	0	0	1.46288e-06	0	0	0	0	0	0	0	0	0	0	0		0.000350694	0.00472293	0.00252141	0	0	0	0	0	0	0	0	0	0	0	0	0	0	0	0	0	0	0	0	0	0	0	0	0	0	0	0
243	R	CGA	0	0	0.000132176	0	0	0	0	0	0	0	0	0	0	0	0	0	0	0	0	0	0	0	0	0	0	0	0	0	0	0	0	0	0	0	0	0	0	0	0	0.000115168	0	0.00182961	0		9.4758e-05	0.00582316	0.00280928
244	Q	CAA	1.51951e-05	0	0	0	0	0	0	0	0	0	0	0	0	0	0	0	0	0	0	0.00134095	0.0108673	0	0	0	0	0	0	0	0	0	0	0	0	0	0	0	0	0	0		0.00609593	0	0	0.00151487	0	0	0
245	C	TGT	0	0	0	0	0	0	0	0.00532261		0	0	0	0	0	0	0	0	0	0.000120475	0	0	0	0	0	0	0	0	0	0	0	0	0	0	0	0	0	0	0	0	0	0	0	0	0	0	0	0.000666877
246	Q	CAA	2.51947e-06	0	0	0	0	0	0	0	0	0	0	0	0	0	0	0	0	0	0	0	0	0	0	0	0	0	0	0	0	0	0	0	0	0	0	0	0	0	0		0.00538124	0	0	0.000909582	0	0	0
247	L	TTA	0	0	0	0	0	0	0	0	0	0	0	0	0	0	0	0	0	0	0	0	0	0.00384573	0	0	0	0	0.005616	0	0	0		0.00461402	0	0	0	0	0	0	0	0	0	0	0	0	0	0	0
248	H	CAC	0	0	0	0	0	0	0	0	0	0	0	0	0	0	0	0	0	0	0		0.0118389	0	0	0	0	0	0	0	0	0	0	0	0	0	0	0	0	0	0	0	0	0	0	0	0.00113347	0	0
249	P	CCC	0	0	0	0	0	0	0	0	0	0	0	0	0	0	0	0	0	0	0	0	0	0	0	0	0	0	0	0	0	0	0	0	0	0	0	0.00210754		0.000405012	0.00433445	0	0	0	0	0	0	0	0
250	Q	CAA	3.20179e-05	0	0	0	0	0	0	0	0	0	0	0	0	0	0	0	0	0	0	0.000235969	0.0007856	0	0	0	0.000474488	0	0	0	0	0	0	0	0	0	4.94861e-05	0	0	0	0		0.00457771	0	0	0.00172239	0	0	0
251	A	GCT	0	0	0	0.00116471	0.00441591	0.000190842		0	0	0	0	0	0	0	0	0	0	0	0.00172655	0	0	0	0	0	0	0	0	0	0	0	0	0	0	0	0	0	0	0	0	0	0	0	0	0	0	0	0
252	P	CCT	0	0	0	0	0	0	0	0	0	0	0	0	0	0	0	0	0	0	0	0	0.000810327	0	0	0	0	0	0	0	0	7.02191e-05	0	0	0	0	0	0.00235158	0.00465965	0.000951481		0	0	0	0	0	0	0	0
253	V	GTA	0	0	0	0.00350663	0	0	0	0	0	0	0	0.00152154	0	0	0	0.000494203	0	0	0	0	0	0.00321194	0	0	0	0	0.000756153	0	0	0	1.94174e-05	0	0	0	0	0	0	0	0	0	0	0	0	0	0	0	0
254	M	ATG	0	0	0	0	0	0	0	0	0	0	0	0	0	0	0	0	0	0	0	0	0	0	0	0	0	0	0	0	0	0	0	0.000921671		0	0	0	0	0	0	0	0	0	0	0	0	0	0
255	L	TTA	0	0	0	0	0	0	0	0	0	0	0	0	0	0.000193949	0.00366524	0	0	0	0	0	0	0.00218883	0	0	0	0	0.00407509	0	0	0		0.00183331	0	0	0	0	0	0	0	0	0	0	0	0	0	0	0
256	K	AAA	0	0	0	0	0	0	0	0	0	0	0	0.00344179	0	0	0	0	0	0	0	0	0	2.31033e-05	0	0		0.00672128	0	0	0	0	0	0	0	0.00114782	0.00204425	0	0	0	0	0.000702387	0	0.00261218	0	0	0	0	0
257	V	GTT	0	0	0	0	0	0	0.00146553	0	0	0	0.000721245	0	0	0	0.000432144	0	0	0	0.000382935	0	0	0	0	0.000930382	0	0	0	0	0	7.71939e-06	0	0	0	0	0	0	0	0	0	0	0	0	0	0	0	0	0
258	S	AGT	0	0	0	0	0	0	0	0	0.00112532	0	0	0	0	0	0	0	0	0	0.00330613	0	0	0	0	0	0	0	0	0	0	0	0	0	0	0	0.00241127	0	0	0	0	0	0	0.00011114	0	0	0	0	0
259	K	AAA	0	0	0	0	0	0	0	0	0	0	1.12965e-05	0.00274066	0	0	0	0	0	0	0	0	0	0.00154746	0	0		0.00289161	0	0	0	0	0	0	0	0.000498026	0.000699288	0	0	0	0	0	0	0.00249627	0	0	0	0	0
260	N	AAT	0	0	0	0	0	0	0	0	0	0	0.0014761	0	0	0	0	0	0	0	0	0	0	0	0	0.000560991	0.000180987	0.0001267	0	0	0	0	0	0	0	0.00184835		0	0	0	0	0	0	0	0	0	0	0	0
261	L	TTA	0	0	0	0	0	0	0	0	0	0	0	0	0	0	0.000826403	0	0	0	0	0	0	0.00111557	0	0	0	0	0.00192981	0	0	0		0.00100904	0	0	0	0	0	0	0	0	0	0	0	0	0	0	0
262	N	AAT	0	0	0	0	0	0	0	0	0	0	0.000337328	0	0	0	0	0	0	0	0	0	0.000472256	0	0	2.99904e-05	0.00248119	0.000142431	0	0	0	0	0	0	0	0.00195647		0	0	0	0	0	0	0	0	0	0	0	0
263	K	AAA	0	0	0	0	0	0	0	0	0	0	0	0.00118307	0	0	0	0	0	0	0	0	0	0.00158956	0	0		0.00278642	0	0	0	0	0	0	0	0.000121703	0.000370109	0	0	0	0	0	0	0.00257565	0	0	0	0	0
264	F	TTT	0	0	0	0	0	0	0	0	0	0	0	0	0	0.003356		0	0	0	0	0	0	0	0	0	0	0	0	0	0	0.00134141	4.53207e-05	1.71448e-05	0	0	0	0	0	0	0	0	0	0	0	0	0	0	0
265	V	GTT	0	0	0	4.37958e-05	0	0	0.00506287	0	0	0	0.00113772	0	0	0	0.00036894	0	0	0	1.2677e-05	0	0	0	0	0.00133773	0	0	0	0	0	5.64286e-05	0	0	0	0	0	0	0	0	0	0	0	0	0	0	0	0	0
266	E	GAG	0	3.22982e-05	0	0	0	0.000597507	0	0	0	0.000492623	0.00142493	0.00325457		0	0	0	0	0.00249125	0	0	0	0	0	0	0	0.00125595	0	0	0	0	0	0	4.15792e-05	0	0	0	0	0	0	0	0.000346951	0	0	0	0	0	0
267	G	GGA	0	0	0	0.000106012	0	0	0	0	0	0	0	0.00115445	0	0	0		0.000376576	0.00501563	0.00218597	0	0	0	0	0	0	0	0	0	0	0	0	0	0	0	0	0	0	0	0	0	0	0.00109808	0	0	0	0	0
268	K	AAA	0	0	0	0	0	0	0	0	0	0	0	0.00440768	0	0	0	0	0	0	0	0	0	0.000995962	0	0		0.0107664	0	0	0	0	0	0	0	0.00106157	0.00209493	0	0	0	0	0.00136228	0	0.00392654	0	0	0	0	0
269	E	GAA	0	0	0	9.75264e-05	0	0	0	0	0	0	0.00154433		0.00516133	0	0	0.00306755	0	0	0	0	0	0	0	0	0.00133546	0	0	0	0	0	0	0	0	0	0	0	0	0	0	0.000449038	0	0	0	0	0	0	0
270	H	CAT	0	0	0	0	0	0	0	0	0	0	0.00126365	0	0	0	0	0	0	0	0	0.00309925		0	0	0	0	0	0	0	0	0.00331695	0	0	0	0	0	0	0	0	1.18721e-05	0.00181779	0.000303788	0	0	0	0	0	0.00319326
271	L	TTA	0	0	0	0	0	0	0	0	0	0	0	0	0	0	0.000597748	0	0	0	0	0	0	0.000940125	0	0	0	0	0.00410943	0	0	0		0.00340617	0	0	0	0	0	0	0	0	0	0	0	0	0	0	0
272	Y	TAT	0	0	0	0	0	0	0	0	0.000321071	0	0	0	0	0	0	0	0	0	0	0	0.000456234	0	0	0	0	0	0	0	0	0	0	0	0	0	0	0	0	0	0	0	0	0	0	0	0	0	0
273	R	CGC	0	0	0	0	0	0	0	0.000132324	0	0	0	0	0	0	0	0	0	0	0	0.000255232	0	0	0	0	0	0	0	0	0	0	0	0	0	0	0	0	0	0	0	0	0	0	0	0.00139708		0.00121867	0.00460457
274	R	AGA	0	0	0	0	0	0	0	0	0	0	0	0	0	0	0	0.000766842	0	0	0	0	0	0	0	0	2.80835e-05	0	0	0	0	0	0	0	0	0	0	0	0	0	0	0	0		0.00532001	0.000167543	0	0	0
275	L	CTA	0	0	0	0	0	0	0	0	0	0	0	0	0	0	0	0	0	0	0	0	0	0	0	0	0	0		1.608e-05	0.00450207	0.000317954	0.00522165	3.73665e-05	0	0	0	0.000521544	0	0	0	0	0	0	0	0	0	0	0
276	T	ACG	0	0	0	0	0	0.000890737	0	0	0	0	0	0	0	0	0	0	0	0	0	0	0	0	0	0	0	0	0	0	0	0	0	0	0.000113697	0	0	0	0	0	0	0	0	0	0	0	0	0	0
277	V	GTT	0	0	0	0	0	0	0.00182608	0	0	0	0	0	0	0	0	0	0	0	0	0	0	0	0	0.00477384	0	0	0	0	0	0.00169703	0	0	0	0	0	0	0	0	0	0	0	0	0	0	0	0	0
278	R	CGG	0	0	0	0	0	0	0	0	0	0	0	0	0	0	0	0	0	0	0	0	0	0	0	0	0	0	0	0	0	0	0	0	0	0	0	0	0	0	0	0	0.000294354	0	0.00207692	0.00324153	0.000844404		0.00197506
279	E	GAA	0	0	0	0	0	0	0	0	0	0	0		0.0046613	0	0	0.000965584	0	0	0	0	0	0	0	0	2.25871e-05	0	0	0	0	0	0	0	0	0	0	0	0	0	0	0	0	0	0	0	0	0	0
280	C	TGT	0	0	0	0	0	0	0	0.00434918		0	0	0	0	0	0	0	0	0	0	0	0	0	0	0	0	0	0	0	0	0	0	0	0	0	0	0	0	0	0	0	0	0	0	0	0	0	0.000425814
281	A	GCA	0	0	0		0.000441204	0.00535187	0.00159545	0	0	0	0	0	0	0	0	8.9467e-05	0	0	0	0	0	0	0	0	0	0	0	0	0	0	0	0	0	0	0	0	0	0	0	0	0	0	0	0	0	0	0
282	R	CGA	0	0	0.000262474	0	0	0	0	0	0	0	0	0	0	0	0	0	0	0	0	0	0	0	0	0	0	0	0	0	0	0	0	0	0	0	0	0	0	0	0	0.000207947	0	0.00174833	0		0.000364712	0.00371812	0.00294111
283	V	GTG	0	0	0	0	0	0.00196748	0	0	0	0	0	0	0	0	0	0	0	0	0	0	0	0	0	0	0	0	0	0	0.0024027	0	0	0.00296777	0.00126904	0	0	0	0	0	0	0	0	0	0	0	0	0	0
284	Q	CAA	0.000130085	7.44255e-06	0	0	0	0	0	0	0	0	0	0	0	0	0	0	0	0	0	0	0	0	0	0	0	0	0	0	0	0	0	0	0	0	0	0	0	0	0		0.00366259	0	0	0.000667484	0	0	0
285	G	GGA	0	0	0	0.000151299	0	0	0	0	0	0	0	4.42506e-05	0	0	0		0.000136007	0.00249873	0.00213935	0	0	0	0	0	0	0	0	0	0	0	0	0	0	0	0	0	0	0	0	0	0	0	0	0	0	0	0
286	F	TTT	0	0	0	0	0	0	0	0	0	0	0	0	0	0.00348595		0	0	0	0	0	0	0	0	0	0	0	0	0	0	0.000842813	0	0	0	0	0	0	0	0	0	0	0	0	0	0	0	0	0
287	P	CCA	0	0	0	0.000740464	0	0	0	0	0	0	0	0	0	0	0	0	0	0	0	0	0	0	0	0	0	0	7.5355e-05	0	0	0	0	0	0	0	0		0.000791626	0.00534933	0.0028168	0.00057845	0	0	0	0.000139308	0	0	0
288	D	GAT	0	0	0	0	0	0	0	0	0	0.00247763		0.000645781	0	0	0	0	0	0	0.000965554	0	0	0	0	0	0	0	0	0	0	0	0	0	0	0	0.00256442	0	0	0	0	0	0	0	0	0	0	0	0
289	D	GAT	0	0	0	0	0	0	0.000316774	0	0	0.00367331		0.00306665	0.00118699	0	0	0	0	0	0.00279813	0	0	0	0	0	0	0	0	0	0	0	0	0	0	0	0.00154005	0	0	0	0	0	0	0	0	0	0	0	0
290	F	TTT	0	0	0	0	0	0	0	0	0	0	0	0	0	0.00212964		0	0	0	0	0	0	0	0	7.47302e-05	0	0	0	0	0	0.000704207	0	0	0	0	0	0	0	0	0	0	0	0	0	0	0	0	0
291	I	ATT	0	0	0	0	0	0	0	0	0	0	0	0	0	0	9.67043e-05	0	0	0	0	0	0	0.00133038	0.00290552		0	0	0	0	0	0	0	0	0.000658468	0	0.0033296	0	0	0	0	0	0	0	0	0	0	0	0
292	F	TTT	0	0	0	0	0	0	0	0	3.91697e-05	0	0	0	0	0.00419916		0	0	0	0	0	0	0	0	0.0016595	0	0	0	0	0	0.00329706	0.00184911	0.000182816	0	0	0	0	0	0	0	0	0	0	0	0	0	0	0
293	H	CAT	0	0	0	0	0	0	0	0	0	0	0.000710205	0	0	0	0	0	0	0	0	0.00587601		0	0	0	0	0	0	0	0	0.00109962	0	0	0	0	0.000795389	0	0	0	0	0.00429402	0.000789304	0	0	0	0	0	0.00407498
294	Y	TAC	5.30234e-05	0	0	0	0	0	0	0.000878459	0	0	0	0	0	0.000166442	0	0	0	0	0	0.000311366	0	0	0	0	0	0	0	0	0	0	0	0	0	0	0	0	0	0	0	0	0	0	0	0	0	0	0
295	E	GAA	0	0	0	0.000137466	0	0	0	0	0	0.00174753	0.00417918		0.00400691	0	0	0.00321182	0	0	0	0	0	0	0	0	0.00350335	0	0	0	0	0	0	0	0	0	0	0	0	0	0	0.000183846	0	0	0	0	0	0	0
296	S	AGT	0	0	0	0	0	0	0	0	0.00326108	0	0	0	0	0	0	0	0	0	0.00469514	0	1.24762e-06	0	0	0.000483012	0	0	0	0	0	0	0	0	0	0	0.00329572	0	0	0	0	0	0	0.00145984	0.000275177	0	8.43818e-05	0	0.00178545
297	L	TTG	0	7.07452e-05	0	0	0	0	0	0	0	0	0	0	0	0	0	0	0	0	0	0	0	0	0	0	0	0	0	0	0.00318362	0	0.00360136		0.00134419	0	0	0	0	0	0	0	0	0	0	0	0	0	0
298	N	AAT	0	0	0	0	0	0	0	0	0	0	0.00433221	0	0	0	0	0	0	0	0	0	6.44064e-05	0	0	0.00225673	0.00170693	0.000105641	0	0	0	0	0	0	0	0.00259348		0	0	0	0	0	0	0	0	0	0	0	0
299	D	GAT	0	0	0	0	0	0	0.000280315	0	0	0.00248488		0.00149522	6.19054e-05	0	0	0	0	0	0.00176823	0	0	0	0	0	0	0	0	0	0	0	0	0	0	0	0.000839988	0	0	0	0	0	0	0	0	0	0	0	0
300	G	GGT	0	0	0	0	2.08831e-05	0	0.00195245	0	7.66867e-05	0	4.24575e-05	0	0	0	0	0.00305463	0.00468394	0		0	0	0	0	0	0	0	0	0	0	0	0	0	0	0	0	0	0	0	0	0	0	0	0	0	0	0	0
301	Y	TAT	0	0	0	0	0	0	0	0	0.000406898	0	0	0	0	0	0	0	0	0	0	0	0.000790553	0	0	0	0	0	0	0	0	0	0	0	0	0	0	0	0	0	0	0	0	0	0	0	0	0	0
302	K	AAA	0	0	0	0	0	0	0	0	0	0	0	0.000348741	0	0	0	0	0	0	0	0	0	0.00200468	0	0		0.00320523	0	0	0	0	0	0	3.54371e-05	0.00107321	0.000748926	0	0	0	0	0	0	0.00227377	0	0	0	0	0
303	M	ATG	0	0	0	0	0	0	0	0	0	0	0	0	0	0	0	0	0	0	0	0	0	0	0	0	0	0	0	0	0.000149107	0	0	0.000667116		0	0	0	0	0	0	0	0	0	0	0	0	0	0
304	I	ATC	0	0	0	0	0	0	0	0	0	0	0	0	0	0	0	0	0	0	0	0	0	0.00239849		0.00460559	0	0	0	0	0	0	0	0	0	0	0	0	0	0	0	0	0	0	0	0	0	0	0
305	G	GGT	0	0	0	0	0	0	0	0	0.000151441	0	9.08218e-05	0	0	0	0	0.00112808	0.00399065	0		0	0	0	0	0	0	0	0	0	0	0	0	0	0	0	0	0	0	0	0	0	0	0	0	0	0	0	0
306	N	AAC	0	0	0	0	0	0	0	0	0	0.000692108	0	0	0	0	0	0	0	0	0	0	0	0	0	0	0	0	0	0	0	0	0	0	0		0.00556863	0	0	0	0	0	0	0	0	0	0	0	0
307	A	GCT	0	0	0	0.00172921	0.00313487	0.00113638		0	0	0	0	0	0	0	0	0	0	0	0	0	0	0	0	0	0	0	0	0	0	0	0	0	0	0	0	0	0	0	0	0	0	0	0	0	0	0	0
308	V	GTG	0	0	0	0	0	0.00125616	0	0	0	0	0	0	0	0	0	0	0	0	0	0	0	0	0	0	0	0	0	0	0	0	0	0	0.000214839	0	0	0	0	0	0	0	0	0	0	0	0	0	0
309	P	CCT	0	0	0	0	0	0	0	0	0	0	0	0	0	0	0	0	0	0	0	0	0	0	0	0	0	0	0	0	0	2.66372e-05	0	0	0	0	0	0.00421092	0.00522842	0.00144135		0	0	0	0	0	0	0	0
310	V	GTA	0	0	0	0.00145499	0	0	0	0	0	0	0	0	0	0	0	0	0	0	0	0	0	0.00909648	0	0	0	0	0.00107097	0	0	0	0.000273763	0	0	0	0	0	0	0	0	0	0	0	0	0	0	0	0
311	N	AAT	0	0	0	0	0	0	0	0	0	0	0.00241756	0	0	0	0	0	0	0	0	0	0.000529774	0	0	0.000940345	0.00272654	0.000305441	0	0	0	0	0	0	0	0.00266729		0	0	0	0	0	0	0	0	0	0	0	0
312	L	TTA	0	0	0	0	0	0	0	0	0	0	0	0	0	5.14832e-05	0.000569589	0	0	0	0	0	0	0.000913809	0	0	0	0	0.00233682	0	0	0		0.00231198	0	0	0	0	0	0	0	0	0	0	0	0	0	0	0
313	A	GCA	0	0	0		0.00104199	0.00623036	0.00619458	0	0	0	0	0	0	0	0	0.000964459	0	0	8.00963e-05	0	0	0	0	0	0	0	0	0	0	0	0	0	0	0	0	0	0	0	0	0	0	0	0	0	0	0	0
314	Y	TAT	0	0	0	0	0	0	0	0	0.00215559	0	0	0	0	0	0.00182771	0	0	0	0	0	0.0035115	0.000102059	0	0	0	0	0	0	0	0	0	0	0	0	0.000841594	0	0	0	0	0	0	0	0	0	0	0	0
315	E	GAA	0.000258952	0	0	0.00101914	0	0	0	0	0	0.00253557	0.00309435		0.00411518	0	0	0.00186226	0	0	0	0	0	0	0	0	0.000728887	0	0	0	0	0	0	0	0	0	0	0	0	0	0	8.51953e-05	0	0	0	0	0	0	0
316	I	ATA	0	0	0	0	0	0	0	0	0	0	0	0	0	0	0	0	0	0	0	0	0		0.00119407	0.000492259	0	0	0.00105439	0	0	0	0.00142063	0	0.00347837	0	0	0	0	0	0	0	0	0	0	0	0	0	0
317	A	GCT	0	0	0	0.00207958	0.00269601	0.000398685		0	0	0	0	0	0	0	0	0	0	0	0.00121409	0	0	0	0	0	0	0	0	0	0	0	0	0	0	0	0	0	0	0	7.23363e-07	0	0	0	0	0	0	0	0
318	K	AAG	0	0.00128818	0	0	0	0	0	0	0	0	0	0	0.00261052	0	0	0	0	0	0	0	0	0	0	0	0.00449104		0	0	0	0	0	0	0.00404254	0.000589846	0.00173059	0	0	0	0	0	0	0	0.00362695	0	0	0	0
319	T	ACA	0	0	0	0.00256288	0	0	0	0	0	0	0	0	0	0	0	0	0	0	0	0	0	0.000153945	0	0	8.65157e-06	0	0	0	0	0	0	0	0	0	0	9.60385e-05	0	0	0	0	0	6.65586e-05	0	0	0	0	0
320	I	ATA	0	0	0	0	0	0	0	0	0	0	0	0	0	0	0	0	0	0	0	0	0		0	0.000120154	0	0	0.000485279	0	0	0	0.0034706	0	0.00106986	0	0	0	0	0	0	0	0	0	0	0	0	0	0
321	K	AAA	5.06331e-05	0	0	0	0	0	0	0	0	0	0	0.00245669	0	0	0	0	0	0	0	0	0	0.00256746	0	0		0.002434	0	0	0	0	0	0	0	0.000986727	0.00291521	0	0	0	0	0.00222426	0	0.00161412	0	0	0	0	0
322	S	TCT	0	0	0	0	0	0	0	0	0.000111853	0	0	0	0	0	0.00374705	0	0	0	0	0	0	0	0	0	0	0	0	0	0	0	0	0	0	0	0	0	0	0	0.00167791	0	0	0	0	0	0	0	0
323	A	GCA	0	0	0		0.000611518	0.00388706	0.00397482	0	0	0	0	3.94737e-05	0	0	0	0.00125566	0	0	0	0	0	0	0	0	0	0	0	0	0	0	0	0	0	0	0	0.000113134	0	0	0	0	0	0	0	0	0	0	0
324	L	TTG	0	0.000325459	0	0	0	0	0	0	0	0	0	0	0	0.00113245	0.00156795	0	0	0	0	0	0	0	0	0	0	0	0	0	0.00534767	0	0.00245881		0.00704184	0	0	0	0	0	0	0	0	0	0	0	0	0	0
325	E	GAA	0.000993782	0	0	0.000766044	0	0	0	0	0	0.00228353	0.00359883		0.00405199	0	0	0.00495287	0	0	0	0	0	0	0	0	0.0022781	0	0	0	0	0	0	0	0	0	0	0	0	0	0	0.000199021	0	0	0	0	0	0	0
326	I	ATT	0	0	0	0	0	0	0	0	0	0	0	0	0	0	0.00122523	0	0	0	0	0	0	0.00294094	0.00299402		0	0	0	6.70821e-05	0	0.00248566	0	0	0	0	0.00526443	0	0	0	0	0	0	0	0	0	0	0	0
327	R	CGT	0	0	0	0	0	0	0	0	0.00464233	0	0	0	0	0	0	0	0	0	0	0	0.00503674	0	0	0	0	0	0	0	0	0.00065006	0	0	0	0	0	0	0	0	0.000382102	0	0	0	0	0.000169091	0.00257017	0
328	K	AAA	0.000486884	0	0	0	0	0	0	0	0	0	0	0.00220957	0	0	0	0	0	0	0	0	0	0.00481426	0	0		0.00491881	0	0	0	0	0	0	0	0.00342042	0.0049205	0	0	0	0	0.000149598	0	0.00463971	0	0	0	0	0
329	G	GGT	0	0	0	0	0	0	0.00120559	0	0.00511692	0	0.00412222	0	0	0	0	0.00143901	0.00431281	0.000332959		0	0	0	0	0	0	0	0	0	0	0	0	0	0	0	0	0	0	0	0	0	0	0	0	0	0	0	0.00041005
330	N	AAT	0	0	0	0	0	0	0	0	0	0	0.00372369	0	0	0	0	0	0	0	0	0	4.34e-05	0	0	0.00253578	0.00237018	0.0010324	0	0	0	0	0	0	0	0.00340451		0	0	0	0	0	0	0	0	0	0	0	0
331	-	TAG	0.0034628		0	0	0	0	0	0	0	0	0	0	0	0	0	0	0	0	0	0	0	0	0	0	0	0.00216371	0	0	0	0	0	0.000637558	0	0	0	0	0	0	0	0	0.00288509	0	0	0	0	0	0
[truncated: 40 more columns]

## Sheet: G7
			TAA	TAG	TGA	GCA	GCC	GCG	GCT	TGC	TGT	GAC	GAT	GAA	GAG	TTC	TTT	GGA	GGC	GGG	GGT	CAC	CAT	ATA	ATC	ATT	AAA	AAG	CTA	CTC	CTG	CTT	TTA	TTG	ATG	AAC	AAT	CCA	CCC	CCG	CCT	CAA	CAG	AGA	AGG	CGA	CGC	CGG	CGT
			-	-	-	A	A	A	A	C	C	D	D	E	E	F	F	G	G	G	G	H	H	I	I	I	K	K	L	L	L	L	L	L	M	N	N	P	P	P	P	Q	Q	R	R	R	R	R	R
2	N	AAT	0	0	0	0	0	0	0	0	0	0	0.00761881	0	0	0	0	0	0	0	0	0	0.00162592	0	0	0.00387419	0.00111588	0.000497093	0	0	0	0	0	0	0	0.00139715		0	0	0	0	0	0	0	0	0	0	0	1.9214e-06
3	L	TTA	0	0	0	0	0	0	0	0	0	0	0	0	0	0	0	0	0	0	0	0	0	0.00168442	0	0	0	0	0.00292785	0	0	0		0.00501981	0	0	0	0	0	0	0	0	0	0	0	0	0	0	0
4	I	ATT	0	0	0	0	0	0	0	0	0	0	0	0	0	0	2.54762e-05	0	0	0	0	0	0	0.00314702	0.00333931		0	0	0	0	0	0.000673206	0	0	0	0	0.000981167	0	0	0	0	0	0	0	0	0	0	0	0
5	S	AGT	0	0	0	0	0	0	0	0	0	0	0	0	0	0	0	0	0	0	0.000520133	0	0	0	0	0	0	0	0	0	0	0	0	0	0	0	0	0	0	0	0	0	0	0	0	0	0	0	0
6	L	CTT	0	0	0	0	0	0	0	0	0	0	0	0	0	0	2.36701e-05	0	0	0	0	0	0	0	0	0.00220822	0	0	0.00697604	0.00597807	0.00263439		8.60345e-06	0	0	0	0	0	0	0	0.00189069	0	0	0	0	0	0	0	0
7	F	TTT	0	0	0	0	0	0	0	0	0	0	0	0	0	0.00690621		0	0	0	0	0	0	0	0	0	0	0	0	0	0	0.000453963	0	0	0	0	0	0	0	0	0	0	0	0	0	0	0	0	0
8	S	TCA	0	0	0	0	0	0	0	0	0	0	0	0	0	0	0	0	0	0	0	0	0	0	0	0	0	0	0	0	0	0	0.000120539	0	0	0	0	0.000840442	0	0	0	0	0	0	0	0	0	0	0
9	G	GGT	0	0	0	0	0	0	0	0	0	0	0.000118446	0	0	0	0	0.00718647	0.00236149	1.97275e-05		0	0	0	0	0	0	0	0	0	0	0	0	0	0	0	0	0	0	0	0	0	0	0	0	0	0	0	0
10	A	GCA	0	0	0		0.000291912	0.00630381	0.0031773	0	0	0	0	0	0	0	0	0	0	0	0	0	0	0	0	0	0	0	0	0	0	0	0	0	0	0	0	0	0	0	0	0	0	0	0	0	0	0	0
11	G	GGG	0	0	0	0	0	0	0	0	0	0	0	0	0.000105011	0	0	0.00503131	0.00458437		0.00406128	0	0	0	0	0	0	0	0	0	0	0	0	0	0	0	0	0	0	0	0	0	0	0	0.000150106	0	0	0	0
12	G	GGA	0	0	0	2.33691e-05	0	0	0	0	0	0	0	6.00737e-05	0	0	0		0.000682012	0.00870909	0.00912712	0	0	0	0	0	0	0	0	0	0	0	0	0	0	0	0	0	0	0	0	0	0	3.35648e-05	0	0	0	0	0
13	L	TTA	0	0	0	0	0	0	0	0	0	0	0	0	0	0	0	0	0	0	0	0	0	9.33098e-05	0	0	0	0	0.00431383	0	0	0		0.00341927	0	0	0	0	0	0	0	0	0	0	0	0	0	0	0
14	D	GAT	0	0	0	0	0	0	0	0	0	0.00518582		0.00979098	0	0	0	0	0	0	0.000744578	0	0	0	0	0	0	0	0	0	0	0	0	0	0	0	5.79014e-05	0	0	0	0	0	0	0	0	0	0	0	0
15	L	CTT	0	0	0	0	0	0	0	0	0	0	0	0	0	0	0.00363434	0	0	0	0	0	0.000935931	0	0	0.00485321	0	0	0.00229841	0.00992661	0.000152716		0	0	0	0	0	0	0	0	0.000806803	0	0	0	0	0	0	0	0
16	G	GGC	0	0	0	0	0.000245171	0	0	0	0	0.000141423	0	0	0	0	0	0.00811952		0.000879479	0.00787788	0	0	0	0	0	0	0	0	0	0	0	0	0	0	0	0	0	0	0	0	0	0	0	0	0	0	0	0
17	F	TTC	0	0	0	0	0	0	0	0	0	0	0	0	0		0.00460787	0	0	0	0	0	0	0	0	0	0	0	0	0.00175777	0	0	0	0	0	0	0	0	0	0	0	0	0	0	0	0	0	0	0
18	Q	CAA	0.000115537	0	0	0	0	0	0	0	0	0	0	0.000226856	0	0	0	0	0	0	0	0.000972863	0.00652721	0	0	0	0.00180361	5.96216e-05	0.00469625	0.000365335	0	0	0	0	0	0	0	0	0	0	0		0.00501526	0	0	0.0227799	0	0	0
19	K	AAA	0	0	0	0	0	0	0	0	0	0	0	0.0033867	0.000221417	0	0	0	0	0	0	0	0	0.00807708	0	0		0.0254676	0	0	0	0	0	0	0	0.00016863	0.00483033	0	0	0	0	0.00160844	0	0.00680171	2.63826e-05	0	0	0	0
20	A	GCA	0	0	0		0.0064305	0.0122926	0.00421398	0	0	0	0	0	0	0	0	0	0	0	0	0	0	0	0	0	0	0	0	0	0	0	0	0	0	0	0	0	0	0	0	0	0	0	0	0	0	0	0
21	G	GGA	0	0	0	0	0	0	0	0	0	0	0	0.000770234	0	0	0		5.17594e-05	0.00593714	0.0178022	0	0	0	0	0	0	0	0	0	0	0	0	0	0	0	0	0	0	0	0	0	0	0.00102756	0	0.000194435	0	0	0
22	F	TTT	0	0	0	0	0	0	0	0	0.000815103	0	0	0	0	0.00441021		0	0	0	0	0	0	0	0	0	0	0	0	0	0	0.0014067	0	0	0	0	0	0	0	0	0	0	0	0	0	0	0	0	0
23	R	CGT	0	0	0	0	0	0	0	0	0.00499729	0	0	0	0	0	0	0	0	0	0	0	0.0163917	0	0	0	0	0	0	0	0	0.00207767	0	0	0	0	0	0	0	0	0.00190458	0	0	0	0	0.00156167	0.00284839	0.000190035
24	I	ATT	0	0	0	0	0	0	0	0	0	0	0	0	0	0	0	0	0	0	0	0	0	0.0112326	0.012358		0	0	0	0	0	0	0	0	0	0	0	0	0	0	0	0	0	0	0	0	0	0	0
25	I	ATT	0	0	0	0	0	0	0	0	0	0	0	0	0	0	0.000877328	0	0	0	0	0	0	0.00519856	0.00643905		0	0	0	0	0	0.000199342	0	0	0	0	0.00212154	0	0	0	0	0	0	0	0	0	0	0	0
26	A	GCC	0	0	0	0.00176071		0.00333364	0.0153076	0	0	0	0	0	0	0	0	0	0	0	0	0	0	0	0	0	0	0	0	0	0	0	0	0	0	0	0	0	0	0	0	0	0	0	0	0	0	0	0
27	A	GCA	0	0	0		0	0.00676127	0.00236458	0	0	0	0	0	0	0	0	0.000388953	0	0	0	0	0	0	0	0	0	0	0	0	0	0	0	0	0	0	0	0	0	0	0	0	0	0	0	0	0	0	0
28	N	AAT	0	0	0	0	0	0	0	0	0	0	0.00073054	0	0	0	0	0	0	0	0	0	0	0	0	0.000374202	0	0	0	0	0	0.000985468	0	0	0	0.00510963		0	0	0	0	0	0	0	0	0	0	0	0
29	E	GAA	0	0	0	0	0	0	0	0	0	0.00412447	0.00608636		0.0210709	0	0	0.000947015	0	0	0	0	0	0	0	0	2.64018e-05	0	0	0	0	0	0	0	0	0	0	0	0	0	0	0	0	0	0	0	0	0	0
30	Y	TAT	0	0	0	0	0	0	0	0	0.00510013	0	0.00218856	0	0	0	0.00516452	0	0	0	0	0	0.00526111	0	0	0	0	0	0	0	0	0	0	0	0	0	0.00156301	0	0	0	0	0	0	0	0	0	0	0	0
31	D	GAT	0	0	0	0	0	0	0	0	0	0.00771226		0.000988073	0	0	0	0	0	0	0.00100207	0	0.000124802	0	0	0	0	0	0	0	0	0	0	0	0	0	0.00258396	0	0	0	0	0	0	0	0	0	0	0	0
32	K	AAA	0	0	0	0	0	0	0	0	0	0	0	0.00342993	0	0	0	0	0	0	0	0	0	0.00449695	0	0		0.0036318	0	0	0	0	0	0	0	0.000550898	0.00134395	0	0	0	0	0	0	0.00160831	0	0	0	0	0
33	S	TCA	0	0	0	0.000957211	0	0	0	0	0	0	0	0	0	0	0	0	0	0	0	0	0	0	0	0	0	0	0	0	0	0	0.00173658	0	0	0	0	0.00065552	0	0	0	0	0	0	0	0	0	0	0
34	I	ATA	0	0	0	0	0	0	0	0	0	0	0	0	0	0	0	0	0	0	0	0	0		0.000895465	0.00592504	0	0	0	0	0	0	0.00183204	0	0.00167163	0	0	0	0	0	0	0	0	0	0	0	0	0	0
35	W	TGG	0	8.98262e-05	0.000437923	0	0	0	0	0	0	0	0	0	0	0	0	0	0	0	0	0	0	0	0	0	0	0	0	0	0	0	0	0.000531442	0	0	0	0	0	0	0	0	0	0	1.1894e-05	0	0	0.000796412	0
36	K	AAA	0	0	0	0	0	0	0	0	0	0	0	0.00678263	0	0	0	0	0	0	0	0	0	0.00154892	0	0		0.00848306	0	0	0	0	0	0	0	0.00153832	0.00385324	0	0	0	0	0.000600703	0	0.00768317	0	0	0	0	0
37	T	ACA	0	0	0	0.00114986	0	0	0	0	0	0	0	0	0	0	0	0	0	0	0	0	0	0.000139307	0	0	0	0	0	0	0	0	0	0	0	0	0	4.93624e-05	0	0	0	0	0	0	0	0	0	0	0
38	Y	TAT	0	0	0	0	0	0	0	0	0.000542039	0	0	0	0	0	0.00348598	0	0	0	0	0	0.000604788	0	0	0	0	0	0	0	0	0	0	0	0	0	0	0	0	0	0	0	0	0	0	0	0	0	0
39	E	GAA	0	0	0	0.00107706	0	0	0	0	0	0	0.0018328		0.00321488	0	0	0.00208644	0	0	0	0	0	0	0	0	0.00025403	0	0	0	0	0	0	0	0	0	0	0	0	0	0	0.000134975	0	0	0	0	0	0	0
40	S	AGT	0	0	0	0	0	0	0	0	0.0152455	0	0	0	0	0	0	0	0	0	0.00328555	0	0	0	0	0.00173258	0	0	0	0	0	0	0	0	0	0	0.00558374	0	0	0	0	0	0	0.000492286	7.53802e-05	0	0	0	0.000455806
41	N	AAT	0	0	0	0	0	0	0	0	0	0	0.000473258	0	0	0	0	0	0	0	0	0	0	0	0	0	0	0	0	0	0	0	0	0	0	0.00422474		0	0	0	0	0	0	0	0	0	0	0	0
42	H	CAT	0	0	0	0	0	0	0	0	0	0	0	0	0	0	0	0	0	0	0	0.00657046		0	0	0	0	0	0	0	0	0.00152092	0	0	0	0	0.00560425	0	0	0	0	0.00322999	0	0	0	0	0	0	0.000612968
43	S	TCA	0	0	0	0.0053092	0	0	0	0	0	0	0	0	0	0	0	0	0	0	0	0	0	0	0	0	1.37033e-05	0	0	0	0	0	0.0053512	0	0	0	0	0.00457658	0	0	0	0	0	0	0	0	0	0	0
44	A	GCT	0	0	0	0.00183598	0.00585184	0		0	0	0	0	0	0	0	0	0	0	0	5.28132e-06	0	0	0	0	0	0	0	0	0	0	0	0	0	0	0	0	2.37553e-05	0	0	0.00012643	0	0	0	0	0	0	0	0
45	K	AAA	0	0	0	0	0	0	0	0	0	0	0.000123053	0.00476047	0	0	0	0	0	0	0	0	0	0.00412683	0	0		0.00414443	0	0	0	0	0	0	0	0.00341399	0.00887472	0	0	0	0	0	0	0.00679339	0	0	0	0	0
46	L	TTG	0	0	0	0	0	0	0	0	0	0	0	0	0	0	0	0	0	0	0	0	0	0	0	0	0	0	0	0	0.00540267	0	0.00766916		0.00179592	0	0	0	0	0	0	0	0	0	0	0	0	0	0
47	I	ATC	0	0	0	0	0	0	0	0	0	0	0	0	0	0.00535802	0	0	0	0	0	0	0	0.00080434		0.00925169	0	0	0	0.000194138	0	0	0	0	0.000368481	0.00442404	0.000497884	0	0	0	0	0	0	0	0	0	0	0	0
48	K	AAA	0	0	0	0	0	0	0	0	0	0	0	0.00175138	0	0	0	0	0	0	0	0	0	0.00110189	0	0		0.00834896	0	0	0	0	0	0	0	0	7.83443e-05	0	0	0	0	0.000596285	0	0.00350251	0	0	0	0	0
49	G	GGC	0	0	0	0	0	0	0	0.00558165	6.11682e-05	0.00996573	0	0	0	0	0	0.000741135		0.00126162	0.0074634	0	0	0	0	0	0	0	0	0	0	0	0	0	0	0	0	0	0	0	0	0	0	0	0	0	0.000841229	0	1.11221e-06
50	D	GAT	0	0	0	0	0	0	0	0	0	0.00336472		1.00638e-05	0	0	0	0	0	0	0.000575629	0	0.000126276	0	0	0	0	0	0	0	0	0	0	0	0	0	0.0045617	0	0	0	0	0	0	0	0	0	0	0	0
51	I	ATA	0	0	0	0	0	0	0	0	0	0	0	0	0	0	0	0	0	0	0	0	0		0	0.00349204	0	0	0	0	0	0	0.0085672	0	0.000716744	0	0	0	0	0	0	0	0	0	0	0	0	0	0
52	S	TCT	0	0	0	0	0	0	0.00172522	0	0.00066484	0	0	0	0	0	0.00126202	0	0	0	0	0	0	0	0	0	0	0	0	0	0	0	0	0	0	0	0	0	0	0	0.000994054	0	0	0	0	0	0	0	0
53	K	AAA	0	0	0	0	0	0	0	0	0	0	0	0.00260573	0	0	0	0	0	0	0	0	0	0.00176788	0	0		0.00390094	0	0	0	0	0	0	0	0.00022286	0.00231364	0	0	0	0	0	0	0.00370493	0	0	0	0	0
54	I	ATT	0	0	0	0	0	0	0	0	0	0	0	0	0	0	0.00393102	0	0	0	0	0	0	0.00129103	0.00772315		0	0	5.47519e-05	0	0	0.0048161	0	0	0.0018671	0	0	0	0	0	0	0	0	0	0	0	0	0	0
55	S	TCT	0	0	0	0	0	0	8.80845e-05	0	0	0	0	0	0	0	0.000531954	0	0	0	0	0	0	0	0	0	0	0	0	0	0	0	0	0	0	0	0	0	0	2.20211e-05	0.00788004	0	0	0	0	0	0	0	0
56	S	TCA	0	0	0	0.000271554	0	0	0	0	0	0	0	0	0	0	0	0	0	0	0	0	0	0	0	0	0	0	0	0	0	0	0.00139959	0	0	0	0	0.0137932	0	0	0	0	0	0	0	0	0	0	0
57	D	GAT	0	0	0	0	0	0	0	0	0	0.00354955		0.00143602	0	0	0	0	0	0	0.00394175	0	0.00131255	0	0	0.000182877	0	0	0	0	0	0	0	0	0	2.30916e-05	0.0046971	0	0	0	0	0	0	0	0	0	0	0	0
58	E	GAA	0	0	0	0.0023523	0	0	0	0	0	0.00128498	0.00627301		0.00394431	0	0	0.0026937	0	0	0	0	0	0	0	0	0.00492179	0	0	0	0	0	0	0	0	0	0	0	0	0	0	0.000109845	0	0	0	0	0	0	0
59	F	TTC	0	0	0	0	0	0	0	0	0	0	0	0	0		0.00403459	0	0	0	0	0	0	0	0.000377086	0	0	0	0	0.00348171	0	0	0.000837818	0.000256587	0	0	0	0	0	0	0	0	0	0	0	0	0	0	0
60	P	CCT	0	0	0	0	0	0	0	0	0	0	0	0	0	0	0	0	0	0	0	0	2.08825e-05	0	0	0	0	0	0	0	0	2.08825e-05	0	0	0	0	0	0.0142664	0.0180304	0.000443806		0	0	0	0	0	0	0	0
61	K	AAG	0	0	0	0	0	0	0	0	0	0	0	0	0.00636902	0	0	0	0	0	0	0	0	0	0	0	0.0194006		0	0	0	0	0	0	0.00650225	0.00969624	0.00229281	0	0	0	0	0	0	0	0.00567404	0	0	0	0
62	C	TGT	0	0	0	0	0	0	0	0.00874579		0	0	0	0	0	0	0	0	0	0	0	0	0	0	0	0	0	0	0	0	0	0	0	0	0	0	0	0	0	0	0	0	0	0	0	0	0	0.0009846
63	D	GAT	0	0	0	0	0	0	0	0	0	0.00242208		0.000850949	0.000279003	0	0	0	0	0	0.00265292	0	0.00108869	0	0	0	0	0	0	0	0	0	0	0	0	0	0.00274251	0	0	0	0	0	0	0	0	0	0	0	0
64	G	GGA	0	0	0	0	0	0	0	0	0	0	0	3.0959e-05	0	0	0		0.000175681	0.0131249	0.00394191	0	0	0	0	0	0	0	0	0	0	0	0	0	0	0	0	0	0	0	0	0	0	6.1971e-05	0	0	0	0	0
65	I	ATT	0	0	0	0	0	0	0	0	0	0	0	0	0	0	0	0	0	0	0	0	0	0.000497259	0.00455057		0	0	0	0	0	0	0	0	0.000748259	0	0	0	0	0	0	0	0	0	0	0	0	0	0
66	I	ATT	0	0	0	0	0	0	0	0	0	0	0	0	0	0	0	0	0	0	0	0	0	0.0104703	0.00732489		0	0	0	0	0	0.000406895	0	0	0	0	0	0	0	0	0	0	0	0	0	0	0	0	0
67	G	GGG	0	0	0	0	0	0	0	0	0	0	0	0	0.000123821	0	0	0.00807877	0.000175963		0.0039465	0	0	0	0	0	0	0	0	0	0	0	0	0	0	0	0	0	0	0	0	0	0	0	0.000101009	0	0	0	0
68	G	GGG	0	0	0	0	0	0.000132493	0	0	0	0	0	0	0.00025554	0	0	0.018962	0.000820891		0.00311223	0	0	0	0	0	0	0	0	0	0	0	0	0	0	0	0	0	0	0	0	0	0	0	0.000139144	0	0	0	0
69	P	CCG	0	0	0	0	0	6.29324e-05	0	0	0	0	0	0	0	0	0	0	0	0	0	0	0	0	0	0	0	0	0	0	0.000390071	0	0	0	0	0	0	0.0157915	0.00549796		0.00415378	0	0	0	0	0	0	0	0
70	P	CCT	0	0	0	0	0	0	0	0	0	0	0	0	0	0	0	0	0	0	0	0	0	0	0	0	0	0	0	0	0	0	0	0	0	0	0	0.0223682	0.00803589	0.00466606		0	0	0	0	0	0	0	0
71	C	TGT	0	0	0	0	0	0	0	0.00766059		0	0	0	0	0	0	0	0	0	0	0	0	0	0	0	0	0	0	0	0	0	0	0	0	0	0	0	0	0	0	0	0	0	0	0	0	0	0.00120549
72	Q	CAA	6.11893e-05	0	0	0	0	0	0	0	0	0	0	0	0	0	0	0	0	0	0	0	3.1104e-05	0	0	0	0	0	0	0	0	0	0	0	0	0	0	0	0	0	0		0.00718139	0	0	0.000776552	0	0	0
73	S	TCT	0	0	0	0	0	0	0	0	0.000269811	0	0	0	0	0	0	0	0	0	0	0	0	0	0	0	0	0	0	0	0	0	0	0	0	0	0	0	0	0	0.00449248	0	0	0	0	0	0	0	0
74	W	TGG	0	0	6.83665e-06	0	0	0	0	0	0	0	0	0	0	0	0	0	0	0	0	0	0	0	0	0	0	0	0	0	0	0	0	0	0	0	0	0	0	0	0	0	0	0	0	0	0	0.000629967	0
75	S	AGT	0	0	0	0	0	0	0	0	0.00036207	0	0	0	0	0	0	0	0	0	0.00103125	0	0	0	0	0	0	0	0	0	0	0	0	0	0	0	0	0	0	0	0	0	0	0	0	0	0	0	0
76	E	GAG	0	1.3671e-05	0	0	0	0.000447243	0	0	0	0.000337182	0.00261844	0.024944		0	0	0	0	0.00447613	0	0	0	0	0	0	0	0.000363864	0	0	0	0	0	0	0	0	0	0	0	0	0	0	0	0	0	0	0	0	0
77	G	GGG	0	0	0	0	0	0.000674257	0	0	0	0	0	0	0.000115733	0	0	0.00841047	0.000285285		0.000867081	0	0	0	0	0	0	0	0	0	0	0	0	0	0	0	0	0	0	0	0	0	0	0	0.000401644	0	0	0	0
78	G	GGA	0	0	0	0	0	0	0	0	0	0	0	9.41695e-05	0	0	0		4.30885e-06	0.0137737	0.0081678	0	0	0	0	0	0	0	0	0	0	0	0	0	0	0	0	0	0	0	0	0	0	0.00011145	0	0	0	0	0
79	S	TCT	0	0	0	0	0	0	0.000119316	0	0	0	0	0	0	0	0.000627793	0	0	0	0	0	0	0	0	0	0	0	0	0	0	0	0	0	0	0	0	0	0	0	0.0019677	0	0	0	0	0	0	0	0
80	L	CTT	0	0	0	0	0	0	0	0	0	0	0	0	0	0	0.000673297	0	0	0	0	0	0.00889841	0	0	0.000143799	0	0	0.00832955	0.00719185	3.28904e-05		0	0	0	0	0	0	0	0	0.00088438	2.16389e-05	0	0	0	0	0	0	0.000140221
81	R	AGA	0	0	0	0	0	0	0	0	0.000439303	0	0	0	0	0	0	0.00182507	0	0.00014646	0	0	0	3.72258e-06	0	0	0.00479279	0	0	0	0	0	0	0	0	0	0	0	0	0	0	0	0		0.00873546	1.51315e-07	0	0	0
82	G	GGA	0	0	0	0	0	0	0	0	0	0	0	0	0	0	0		3.3396e-05	0.00485243	0.00588141	0	0	0	0	0	0	0	0	0	0	0	0	0	0	0	0	0	0	0	0	0	0	0	0	0	0	0	0
83	I	ATT	0	0	0	0	0	0	0	0	0	0	0	0	0	0	0.00126098	0	0	0	0	0	0	0.00178868	0.0159363		0	0	0	0	0	0	0	0	0.000644084	0	0.000606922	0	0	0	0	0	0	0	0	0	0	0	0
84	D	GAT	0	0	0	0	0	0	0	0	0	0.0101318		0.00932279	0	0	0	0	4.80737e-05	0	0.00874491	0	0.00090812	0	0	0	0	0	0	0	0	0	0	0	0	0	0.00547523	0	0	0	0	0	0	0	0	0	0	0	0
85	D	GAT	0	0	0	0	0	0	0	0	0	0.00346567		0.00230763	0	0	0	0	0	0	0.000774942	0	0	0	0	0	0	0	0	0	0	0	0	0	0	0	4.83323e-05	0	0	0	0	0	0	0	0	0	0	0	0
86	P	CCT	0	0	0	0	0	0	0.0051838	0	0	0	0	0	0	0	0	0	0	0	0	0	0.00270769	0	0	0	0	0	0	0	0	0.00537634	0	0	0	0	0	0.00268458	0.00467933	0.00549572		0	0	0	0	0	0	0	0.00191056
87	R	CGG	0	0	0	0	0	0	0	0	0	0	0	0	0	0	0	0	0	0	0	0	0	0	0	0	0	0	0	0	0.00254594	0	0	0	0	0	0	0	0	0	0	0	0.00149389	0	0.00476694	0.000341069	9.5188e-05		0.0116234
88	G	GGC	0	0	0	0	0	0	0	0	0	0.000471505	0	0	0	0	0	0.00253971		0	0.0105752	0	0	0	0	0	0	0	0	0	0	0	0	0	0	0	0	0	0	0	0	0	0	0	0	0	0	0	0
89	K	AAA	0	0	0	0	0	0	0	0	0	0	0	0.00234848	0	0	0	0	0	0	0	0	0	0.000709923	0	0		0.00315629	0	0	0	0	0	0	0	0	0.000696154	0	0	0	0	0	0	0.0111196	0	0	0	0	0
90	L	CTT	0	0	0	0	0	0	0	0	0	0	0	0	0	0	0.000138688	0	0	0	0	0	0	0	0	0	0	0	0.00241804	0.00346375	0.00397937		0	0	0	0	0	0	0	0	0.00143498	0	0	0	0	0	0	0	0
91	F	TTT	0	0	0	0	0	0	0	0	0	0	0	0	0	0.00458514		0	0	0	0	0	0	0	0	0.000932454	0	0	0	0	0	0.00436912	0.00135958	0.000230393	0	0	0	0	0	0	0	0	0	0	0	0	0	0	0
92	Y	TAT	0	0	0	0	0	0	0	0	0.00175932	0	0	0	0	0	0.00680225	0	0	0	0	0	0.00356358	0	0	0	0	0	0	0	0	0	0	0	0	0	0.000364893	0	0	0	0	0	0	0	0	0	0	0	5.9986e-05
93	E	GAA	0	0	0	0.000263563	0	0	0	0	0	0.00125839	0.00410076		0.0118614	0	0	0.000872641	0	0	0	0	0	0	0	0	7.06879e-05	0	0	0	0	0	0	0	0	0	0	0	0	0	0	0.000111293	0	0	0	0	0	0	0
94	Y	TAT	0	0	0	0	0	0	0	0	0.000463779	0	0	0	0	0	0.0012486	0	0	0	0	0	0.00033651	0	0	0	0	0	0	0	0	0	0	0	0	0	0	0	0	0	0	0	0	0	0	0	0	0	0
95	I	ATT	0	0	0	0	0	0	0	0	0	0	0	0	0	0	0.00108702	0	0	0	0	0	0	0.00192234	0.00336274		0	0	0	0	0	0	0	0	0	0	0.00238819	0	0	0	0	0	0	0	0	0	0	0	0
96	R	CGG	0	0	0	0	0	0	0	0	0	0	0	0	0	0	0	0	0	0	0	0	0	0	0	0	0	0	0	0	0	0	0	0	0	0	0	0	0	0	0	0	0.000457849	0	0.00351489	0.0206259	0.00111556		0.000278951
97	I	ATT	0	0	0	0	0	0	0	0	0	0	0	0	0	0	0.00202251	0	0	0	0	0	0	0.00423784	0.0132704		0	0	0	0	0	0	0	0	0.00489601	0	0	0	0	0	0	0	0	0	0	0	0	0	0
98	L	TTA	0	0	0	0	0	0	0	0	0	0	0	0	0	0	0.00137097	0	0	0	0	0	0	0.00650275	0	0	0	0	0.0132482	0	6.51402e-05	0		0.00993257	0	0	0	0	0	0	0	0	0	0	0	0	0	0	0
99	K	AAA	0	0	0	0	0	0	0	0	0	0	0	0.0070595	0	0	0	0	0	0	0	0	0	0.00488085	0	0		0.0186022	0	0	0	0	0	0	0	0.000252499	0.0033517	0	0	0	0	0.000206471	0	0.00649182	0	0	0	0	0
100	Q	CAA	0	0	0	0	0	0	0	0	0	0	0	0.00359191	0	0	0	0	0	0	0	0	0.00935562	0	0	0	0.000458808	0	0.00143421	0	0	0	0	0	0	0	0	0	0	0	0		0.00690235	0	0	0.00892704	0	0	0
101	K	AAA	0	0	0	0	0	0	0	0	0	0	0	0.00171778	0	0	0	0	0	0	0	0	0.000478334	0.002314	0	0		0.0123496	0	0	0	0	0	0	0	0.00285775	0.00116448	0	0	0	0	0.00287683	0	0.0036066	0	0	0	0	0
102	K	AAA	0	0	0	0	0	0	0	0	0	0	0	0.00422395	0	0	0	0	0	0	0	0	0	0.00277911	0	0		0.00656431	0	0	0	0	0	0	0	0.000466438	0.0028345	0	0	0	0	0.0040116	0	0.00268217	0	0	0	0	0
103	P	CCA	0	0	0	0.000154056	0	0	0	0	0	0	0	0	0	0	0	0	0	0	0	0	0	0	0	0	0	0	2.43732e-05	0	0	0	0	0	0	0	0		0.000724662	0.0152449	0.00571314	0	0	0	0	0	0	0	0
104	K	AAA	0	0	0	0	0	0	0	0	0	0	0	0.0043293	0	0	0	0	0	0	0	0	0	0.00703204	0	0		0.00161409	0	0	0	0	0	0	0	0.00190056	0.00342423	0	0	0	0	0.00106192	0	0.0035986	0	0	0	0	0
105	F	TTC	0	0	0	0	0	0	0	0	0	0	0	0	0		0.00133731	0	0	0	0	0	0	0	0	0	0	0	0	0.000967764	0	0	0	0	0	0	0	0	0	0	0	0	0	0	0	0	0	0	1.12864e-06
106	F	TTT	0	0	0	0	0	0	0	0	0.000446187	0	0	0	0	0.00305544		0	0	0	0	0	0	0	0	0	0	0	0	0	0	0.00170533	0	0	0	0	0	0	0	0	0	0	0	0	0	0	0	0	0
107	L	CTT	0	0	0	0	0	0	0	0	0	0	0	0	0	0	3.5117e-05	0	0	0	0	0	0	0	0	0.00583874	0	0	0.00385556	0.0164378	0.000200935		0	0	0	0	0	0	0	0	0.000976961	0	0	0	0	0	0	0	0
108	A	GCC	0	0	0	0.00491324		0.000672408	0.00689785	0	0	0	0	0	0	0	0	0	6.12842e-05	0	0	0	0	0	0	0	0	0	0	0	0	0	0	0	0	0	0	0	0	0	0	0	0	0	0	0	0	0	0
109	E	GAA	0	0	0	0	0	0	0	0	0	0	0		0.0103666	0	0	0.00025322	0	0	0	0	0	0	0	0	0.000163535	0	0	0	0	0	0	0	0	0	0	0	0	0	0	0	0	0	0	0	0	0	0
110	N	AAC	0	0	0	0	0	0	0	0	0	0.000804765	0	0	0	0	0	0	0	0	0	0	0	0	0	0	0	0	0	0	0	0	0	0	0		0.0137925	0	0	0	0	0	0	0	0	0	0	0	0
111	V	GTT	0	0	0	0	0	0	0.000830816	0	0	0	0	0	0	0	0	0	0	0	0	0	0	0	0	3.5695e-05	0	0	0	0	0	0	0	0	0	0	0	0	0	0	0	0	0	0	0	0	0	0	0
112	K	AAA	0	0	0	0	0	0	0	0	0	0	0	0.00233145	0	0	0	0	0	0	0	0	0	0.00182777	0	0		0.0215156	0	0	0	0	0	0	0	0.000247892	0.000880943	0	0	0	0	0	0	0.00815277	2.96323e-05	0	0	0	0
113	G	GGA	0	0	0	0	0	0	0	0	0	0	0	0	0	0	0		0	0.0048441	0.0014565	0	0	0	0	0	0	0	0	0	0	0	0	0	0	0	0	0	0	0	0	0	0	0	0	0	0	0	0
114	M	ATG	0	0	0	0	0	0	0	0	0	0	0	0	0	0	0	0	0	0	0	0	0	0.00450891	0.000745545	0	0	0	0	0	2.45012e-05	0	0	0.000158524		0	0	0	0	0	0	0	0	0	0	0	0	0	0
115	L	CTG	0	0	0	0	0	0	0	0	0	0	0	0	0	0	0	0	0	0	0	0	0	0	0	0	0	0	0.0106455	0.000225878		0.00118005	0	0.0351253	0.0028597	0	0	0	0	0.000812047	0	0	0.000677991	0	0	0	0	2.61071e-05	0
116	A	GCT	0	0	0	0.00105876	0.00948098	0.00152914		0	0	0	0.000685604	0	0	0	0	0	0	0	0.000509539	0	0	0	0	0	0	0	0	0	0	0	0	0	0	0	0	0	0	0	0	0	0	0	0	0	0	0	0
117	Q	CAG	0	5.63507e-05	0	0	0	0	0	0	0	0	0	0	0	0	0	0	0	0	0	8.80117e-05	0.00329896	0	0	0	0	0.00230164	0	0	0.00222776	0	0	0	0	0	0	0	0	2.73282e-05	0	0.0128711		0	5.43235e-05	0	0	0.0126917	0
118	R	CGT	0	0	0	0	0	0	0	0	0.00804145	0	0	0	0	0	0	0	0	0	0	0	0.00211351	0	0	0	0	0	0	0	0	2.52643e-06	0	0	0	0	0	0	0	0	0.000579509	0	0	0	0	0.00167522	0.00877377	0
119	H	CAT	0	0	0	0	0	0	0	0	0	0	0	0	0	0	0	0	0	0	0	0.00828993		0	0	0	0	0	0	0	0	0	0	0	0	0	0.00117253	0	0	0	0	0	0	0	0	0	0	0	0.000776795
120	N	AAT	0	0	0	0	0	0	0	0	0	0	0.00236827	0	0	0	0	0	0	0	0	0	0.000655904	0	5.9825e-05	0.0150655	0.00530594	3.42854e-06	0	0	0	0	0	0	0	0.00792197		0	0	0	0	0	0	0	0	0	0	0	0
121	K	AAG	0	0	0	0	0	0	0	0	0	0	0	0	0.00522561	0	0	0	0	0	0	0	0	0	0	0	0.00263978		0	0	0	0	0	0	0.00699131	0.000115056	0.00356927	0	0	0	0	0	9.25428e-05	0	0.0102718	0	0	0	0
122	A	GCT	0	0	0	0.00596027	0.00788153	0.00781062		0	0	0	0.000355214	0	0	0	0	0	0	0	0	0	0	0	0	0	0	0	0	0	0	0	0	0	0	0	0	0	0	0	0.00107442	0	0	0	0	0	0	0	0
123	V	GTT	0	0	0	0	0	0	0.00340031	0	0	0	6.27532e-05	0	0	0	0.000193809	0	0	0.000567215	0.00605201	0	0	8.66769e-05	0	0.0107001	0	0	0	0	0	0.00191501	0	0	0	0	0	0	0	0	0	0	0	0	0	0	0	0	0
124	Q	CAA	0.000226984	0	0	0	0	0	0	0	0	0	0	0.000700297	0	0	0	0	0	0	0	0.000272257	0.00347432	0	0	0	0.00109541	0	0.002894	0	0	0	0	0	0	0	0	0	0	0	0		0.0110803	0	0	0.00572565	0	0	0
125	E	GAA	0	0	0	0.000223589	0	0	0	0	0	0.00116418	0.00751217		0.0122742	0	0	0.00864167	0	4.70424e-05	0	0	0	0	0	0	0.00703204	0	0	0	0	0	0	0	0	0	0	0	0	0	0	0.000144879	0	0	0	0	0	0	0
126	F	TTT	0	0	0	0	0	0	0	0	0	0	0	0	0	0.00322623		0	0	0	0	0	0	0	3.74898e-05	0.00461175	0	0	0	0.00013789	0	0.00894503	0.000816618	0.000178071	0	0	0	0	0	0	0	0	0	0	0	0	0	0	0
127	I	ATC	0	0	0	0	0	0	0	0	0	0	0	0	0	0.00160965	0	0	0	0	0	0	0	0.00318003		0.00638134	0	0	0	0.000652888	0	0	0	0	0.000253229	0.00435478	0	0	0	0	0	0	0	0	0	0	0	0	0
128	Q	CAA	9.94055e-05	0	0	0	0	0	0	0	0	0	0	0.00186574	0	0	0	0	0	0	0	0.00143827	0.00472091	0	0	0	0.00141004	0	0.00157538	0	0	0	0	0	0	0	0	0	0	0	0		0.0204123	0	0	0.0256226	0	7.8285e-05	0
129	E	GAA	0	0	0	0	0	0	0	0	0	0.000610437	0.00791284		0.00476127	0	0	0.0114487	0	0	0	0	0	0	0	0	0.00277891	0	0	0	0	0	0	0	0	0	0	0	0	0	0	0.00075608	0	0	0	0	0	0	0
130	F	TTT	0	0	0	0	0	0	0	0	0.000134459	0	0	0	0	0.00728779		0	0	0	0	0	0	0	0	0.00131624	0	0	0	0	0	0.00139558	0.000719086	0.000301496	0	0	0	0	0	0	0	0	0	0	0	0	0	0	0
131	D	GAT	0	0	0	0	0	0	0	0	0	0.00193285		0.00295374	0	0	0	0	0	0	0.00420288	0	0.00396218	0	0	0.00012009	0	0	0	0	0	0	0	0	0	2.46404e-05	0.00482537	0	0	0	0	0	0	0	0	0	0	0	0
132	N	AAT	0	0	0	0	0	0	0	0	0	0	0.00450526	0	0	0	0	0	0	0	0	0	0.000580615	9.11639e-05	0	0.0146595	0.00516975	0	0	0	0	0	0	0	0	0.00440144		0	0	0	0	0	0	0	0	0	0	0	0
133	A	GCT	0	0	0	0.00239145	0.00532546	0.00672646		0	0	0	0.00192303	0	0	0	0	0	0	0	0.000841407	0	0	0	0	0.000103893	0	0	0	0	0	0	0	0	0	0	0	0	0	0	0	0	0	0	0	0	0	0	0
134	G	GGA	0	0	0	0.00148277	0	0	0	0	0	0	0	0.00576014	0	0	0		0.00170559	0.00957875	0.00831607	0	0	0	0	0	0	0	0	0	0	0	0	0	0	0	0	0	0	0	0	0	0	0.00559411	0	0.00220804	0	0	0
135	Y	TAT	0	0	0	0	0	0	0	0	0.000703051	0	0	0	0	0	0.00597614	0	0	0	0	0	0.000448926	0	0	0	0	0	0	0	0	0	0	0	0	0	0	0	0	0	0	0	0	0	0	0	0	0	0
136	D	GAT	0	0	0	0	0	0	0.000285311	0	0	0.00429094		0.0053423	9.02625e-05	0	0	0	0	0	0.0118408	0	0.000623078	0	0	0	0	0	0	0	0	0	0	0	0	0	0.00459541	0	0	0	0	0	0	0	0	0	0	0	0
137	V	GTC	0	0	0	0	0.00567681	0	0	0	0	5.52629e-05	0	0	0	0.000200303	0	0	0.000115279	0	0	0	0	0	0.0180752	0	0	0	0	0.00123559	0	0	0	0	0	0	0	0	0	0	0	0	0	0	0	0	0	0	0
138	H	CAT	0	0	0	0	0	0	0	0	0	0	8.77459e-05	0	0	0	0	0	0	0	0	0.00691231		0	0	0	0	0	0	0	0	0.00162759	0	0	0	0	0.00162759	0	0	0	0	0.00290032	0	0	0	0	0	0	0.0143654
139	I	ATT	0	0	0	0	0	0	0	0	0	0	0	0	0	0	0.00674415	0	0	0	0	0	0	0.000207201	0.0135864		0	0	0	0	0	0.00287323	1.22733e-05	0	0	0	0.006477	0	0	0	0	0	0	0	0	0	0	0	0
140	I	ATT	0	0	0	0	0	0	0	0	0	0	0	0	0	0	0.00291234	0	0	0	0	0	0	0.00755903	0.00361553		0	6.56796e-05	0	0	0	0	0	0	0.00533695	0	0.010985	0	0	0	0	0	0	0	0	0	0	0	0
141	L	TTG	0	0	0	0	0	0	0	9.99735e-05	0	0	0	0	0	0.0014145	0.000930522	0	0	0	0	0	0	0	0	0	0	0	0.000234088	0	0.00533298	0	0.0123653		0.00380524	0	0	0	0	0	0	0	0	0	0	0	0	0	0
142	L	CTT	0	0	0	0	0	0	0	0	0	0	0	0	0	0	0.00602943	0	0	0	0	0	0.000222166	0	0	0.000340803	0	0	0.00351433	0.0108639	0.000222166		0	0	0	0	0	0	0	0	0.00150344	0	0	0	0	0	0	0	0
143	N	AAT	0	0	0	0	0	0	0	0	0	0	0.000982368	0	0	0	0	0	0	0	0	0	0	0	0	0	0	0	0	0	0	0	0	0	0	0.00692068		0	0	0	0	0	0	0	0	0	0	0	0
144	A	GCG	0	0	0	0.00926747	0.00483369		0.00285508	0	0	0	0	0	0	0	0	0	0	0	0	0	0	0	0	0	0	0	0	0	0	0	0	0	0	0	0	0	0	0	0	0	0	0	0	0	0	0	0
145	N	AAT	0	0	0	0	0	0	0	0	0	0	0.0035734	0	0	0	0	0	0	0	0	0	0.000332405	0	0	0.00168896	0.00273246	0.000105289	0	0	0	0	0	0	0	0.0100738		0	0	0	0	0	0	0	0	0	0	0	0
146	D	GAT	0	0	0	0	0	0	0	0	0	0.0100143		0.0037007	0.000850397	0	0	0	0	0	0.00164039	0	0.000528079	0	0	0	0	0	0	0	0	0	0	0	0	0	0.00184895	0	0	0	0	0	0	0	0	0	0	0	0
147	Y	TAT	0	0	0	0	0	0	0	0	0.000815621	0	0	0	0	0	0.00674782	0	0	0	0	0	0.00357257	0	0	0	0	0	0	0	0	0	0	0	0	0	0	0	0	0	0	0	0	0	0	0	0	0	0
148	G	GGT	0	0	0	0	0	0	0.00303555	0	0.000478855	0	0.00691602	0	0	0	0	0.0140929	0.00768174	0.000835755		0	0	0	0	0	0	0	0	0	0	0	0	0	0	0	0	0	0	0	0	0	0	0	0	0	0	0	0.00350926
149	V	GTA	0	0	0	0.00279608	0	0	4.26077e-05	0	0	0	0	0.00052313	0	0	0	0	0	0	0	0	0	0.0124169	0	0	0	0	0.000412095	0	0	0.00023202	0	0	0	0	0	0	0	0	0	0	0	0	0	0	0	0	0
150	A	GCT	0	0	0	0.00386588	0.0107685	0.0108624		0	0	0	0	0	0	0	0	0	0	0	0.000464886	0	0	0	0	0	0	0	0	0	0	0	0	0	0	0	0	0	0	0	0.000947868	0	0	0	0	0	0	0	0
151	Q	CAA	8.23671e-05	0	0	0	0	0	0	0	0	0	0	0	0	0	0	0	0	0	0	0	0	0	0	0	0	0	0	0	0	0	0	0	0	0	0	0	0	0	0		0.0124449	0	0	0.000443722	0	0	0
152	D	GAT	0	0	0	0	0	0	0	0	0	0.00504595		0.00325922	0	0	0	0	0	0	0.00182551	0	0.00271167	0	0	0	0	0	0	0	0	0	0	0	0	0	0.00232983	0	0	0	0	0	6.91325e-05	0	0	0	0	0	0
153	R	AGA	0	0	0	0	0	0	0	0	0	0	0	0	0	0	0	0.000903365	0	0	0	0	0	0	0	0	0	0	0	0	0	0	0	0	0	0	0	0	0	0	0	0	0		0.0129576	0	0	0	0
154	K	AAA	0	0	0	0	0	0	0	0	0	0	0	0.00563571	0.000538796	0	0	0	0	0	0	0	0	0.00245818	0	0		0.0134358	0	0	0	0	0	0	0	0.00215518	0.00673892	0	0	0	0	0.00374784	0	0.00269125	3.38079e-05	0	0	0	0
155	R	CGT	0	0	0	0	0	0	0	0	2.67526e-06	0	0	0	0	0	0	0	0	0	0	0	0.000100787	0	0	0	0	0	0	0	0	0	0	0	0	0	0	0	0	0	0	0	0	0	0	5.17309e-05	0.00500635	0
156	V	GTT	0	0	0	0	0	0	0.00102902	0	0	0	0	0	0	0	0	0	0	0	0.000591782	0	0	0	0	0.000728954	0	0	0	0	0	0	0	0	0	0	0	0	0	0	0	0	0	0	0	0	0	0	0
157	F	TTT	0	0	0	0	0	0	0	0	6.20743e-05	0	0	0	0	0.00368117		0	0	0	0	0	0	0	0	0.00396164	0	0	0	0	0	0.000695415	0.00264068	0.00176305	0	0	0	0	0	0	0	0	0	0	0	0	0	0	0
158	Y	TAT	0	0	0	0	0	0	0	0	0.00283689	0	0	0	0	0	0.00517314	0	0	0	0	0	0.000286555	0	0	0	0	0	0	0	0	0	0	0	0	0	0	0	0	0	0	0	0	0	0	0	0	0	0
159	I	ATT	0	0	0	0	0	0	0	0	0	0	0	0	0	0	0	0	0	0	0	0	0	0.00349194	0.00975497		0	0	0	0	0	0	0	0	0.000671689	0	0	0	0	0	0	0	0	0	0	0	0	0	0
160	G	GGT	0	0	0	0	0	0	0.000534533	0	0.000563639	0	0	0	0	0	0	0.00190251	0.00988722	0.000214369		0	0	0	0	0	0	0	0	0	0	0	0	0	0	0	0	0	0	0	0	0	0	0	0	0	0	0	0
161	F	TTT	0	0	0	0	0	0	0	0	0	0	0	0	0	0.0074029		0	0	0	0	0	0	0	0	0	0	0	0	0	0	0.000751432	0	0	0	0	0	0	0	0	0	0	0	0	0	0	0	0	0
162	R	AGA	0	0	0	0	0	0	0	0	4.06304e-05	0	0	0	0	0	0	0.00614426	0	0	0	0	0	0.000836792	2.10072e-06	0	0.00271511	0	0	0	0	0	0	0	0	0	0	0	0	0	0	0	0		0.0140043	0	0	0	0
163	K	AAA	0	0	0	0	0	0	0	0	0	0	0	0.00540923	0	0	0	0	0	0	0	0	0	0.00594208	0	0.000172434		0.0201291	0	0	0	0	0	0	4.87377e-05	0.00728371	0.00575178	0	0	0	0	0.00056604	0	0.0104808	0	0	0	0	0
164	E	GAG	0	0	0	0	0	0.0042838	0	0	0	0	0.000155681	0.000905385		0	0	0	0	0.00753884	0	0	0	0	0	0	0	0.00822211	0	0	0	0	0	0	0	0	0	0	0	0	0	0	0	0	0	0	0	0	0
165	L	TTA	0	0	0	0	0	0	0	0	0	0	0	0	0	0	0.00140478	0	0	0	0	0	0	0.000599821	0	0	0	0	0.00284422	0	0	0		0.00603563	0	0	0	0	0	0	0	0	0	0	0	0	0	0	0
166	N	AAT	0	0	0	0	0	0	0	0	0	0	0.00800889	0	0	0	0	0	0	0	0	0	0.00187671	0	0	0.00722344	0.0017253	0	0	0	0	0	0	0	0	0.0044791		0	0	0	0	0	0	0	0	0	0	0	0
167	I	ATA	0	0	0	0	0	0	0	0	0	0	0	0	0	0	0	0	0	0	0	0	0		0	0	0.000599729	0	0	0	0	0	0.00131382	0	0.00155494	0	0	0	0	0	0	0	0	0.000970684	0	0	0	0	0
168	N	AAT	0	0	0	0	0	0	0	0	0	0	0.00426402	0	0	0	0	0	0	0	0	0	0.000278555	0	0	0.00160704	0.0101835	0.00689389	0	0	0	0	0	0	0	0.00772533		0	0	0	0	0	0	0	0	0	0	0	0
169	Y	TAT	0	0	0	0	0	0	0	0	0.000200463	0	0	0	0	0	0	0	0	0	0	0	0.000649006	0	0	0	0	0	0	0	0	0	0	0	0	0	0	0	0	0	0	0	0	0	0	0	0	0	0
170	L	CTT	0	0	0	0	0	0	0	0	0	0	0	0	0	0	0.00247054	0	0	0	0	0	0.00810793	0	0	0.00150413	0	0	0.00375908	0.003445	0.000175316		0	0	0	0	0	0	0	0	0.00331615	0	0	0	0	0	0	0	0.000755162
171	P	CCA	0	0	0	0.000308542	0	0	0	0	0	0	0	0	0	0	0	0	0	0	0	0	0	0	0	0	0	0	0.00236766	0	0	0	0	0	0	0	0		0.0013693	0.009247	0.00243786	0.000659529	0	0	0	0.000690728	0	0	0
172	P	CCC	0	0	0	0	3.55528e-05	0	0	0	0	0	0	0	0	0	0	0	0	0	0	0	0	0	0	0	0	0	0	0.000210234	0	0	0	0	0	0	0	0.00437463		0.00697388	0.0131925	0	0	0	0	0	0	0	0
173	I	ATT	0	0	0	0	0	0	6.61403e-06	0	0	0	0	0	0	0	0.002596	0	0	0	0	0	0	0.00583851	0.00821772		0	0	0	0	0	0.000903363	0	0	0	0	0.00890429	0	0	0	0	0	0	0	0	0	0	0	0
174	P	CCA	0	0	0	0.00400936	0	0	0	0	0	0	0	0	0	0	0	0	0	0	0	0	0	0	0	0	0	0	0.000405065	0	0	0	0	0	0	0	0		0	0.00918306	0.00710826	0.00241336	0	0	0	0	0	3.80913e-05	0
175	H	CAT	0	0	0	0	0	0	0	0	0	0	0.00187633	4.55867e-05	0	0	0	0	0	0	0	0.00401442		0	0	0	0	0	0	0	0	0.00287876	0	0	0	0	0.000569361	0	0	0	0	0.0103208	0.00207935	0	0	0	0	0	0.00373526
176	L	TTG	0	0.00134417	0	0	0	0	0	0	0	0	0	0	0	0.000896901	0	0	0	0	0	0	0	0	0	0	0	0	0	0	0.00833117	0	0.00715861		0.00635474	0	0	0	0	0	0	0	0	0	0	0	0	0	0
177	I	ATA	0	0	0	0	0	0	0	0	0	0	0	0	0	0	0	0	0	0	0	0	0		0	0.00177712	0.00663098	0.000504522	0.000130473	0	0	0	0.00261478	0	0.00628674	0	6.27397e-05	0	0	0	0	0	0	0.000646842	0	0	0	0	0
178	K	AAG	0	0	0	0	0	0	0	0	0	0	0	0	0.00085731	0	0	0	0	0	0	0	0	0	0	0	0.0119415		0	0	0	0	0	0	0.00218609	3.78965e-05	0.000497432	0	0	0	0	0.000572821	0.0017487	0	0.0108951	0	0	0	0
179	P	CCA	0	0	0	0.000686814	0	0	0	0	0	0	0	0	0	0	0	0	0	0	0	0	0	0	0	0	0	0	0.00266542	0	0	0	3.11325e-05	0	0	0	0		0.00585876	0.00629904	0.00272377	2.37435e-05	0	0	0	1.31344e-05	0	0	0
180	T	ACA	0	0	0	0.00421975	0	0	0	0	0	0	0	0	0	0	0	0	0	0	0	0	0	0.00372671	0	0.000885454	0.000372968	0	0	0	0	0	0	0	0	0	0	0	0	0	0	0	0	0.00153368	0	0	0	0	0
181	L	TTG	0	0	0	0	0	0	0	0	0	0	0	0	0	0.000800459	0.0035588	0	0	0	0	0	0	0	0	0	0	0	0	0	0.00749856	0	0.00691039		0.0109566	0	0	0	0	0	0	0	0	0	0	0	0	0	0
182	K	AAG	0	0	0	0	0	0	0	0	0	0	0	0	0.00471048	0	0	0	0	0	0	0	0	0	0	0	0.00185465		0	0	0	0	0	0	0.00776814	0	0.00178906	0	0	0	0	0	0.0011079	0	0.00755118	0	0	0	0
183	D	GAC	0	0	0	0	0.000337965	0	0	0	0		0.0137467	0.000318034	0.00158865	0	0	0	0.00141923	0	0	0	0	0	0	0	0	0	0	0	0	0	0	0	0	0.0010804	0	0	0	0	0	0	0	0	0	0	0	0	0
184	V	GTC	0	0	0	0	0.014122	0	0	0	0	0	0	0	0	0.000312922	0	0	0	0	0	0	0	0	0.0103327	0	0	0	0	0.000136448	0	0	0	0	0	0	0	0	0	0	0	0	0	0	0	0	0	0	0
185	I	ATT	0	0	0	0	0	0	0	0	0	0	0	0	0	0	0	0	0	0	0	0	0	0.00542376	0.0175355		0	0	0	0	0	0	0	0	0.00161612	0	0	0	0	0	0	0	0	0	0	0	0	0	0
186	W	TGG	0	0	0.00011418	0	0	0	0	0	8.52954e-05	0	0	0	0	0	0	0	0	0	0	0	0	0	0	0	0	0	0	0	0	0	0	0.000138251	0	0	0	0	0	0	0	0	0	0	0	0	0	0.000951838	0
187	D	GAT	0	0	0	0	0	0	0	0	0	0.00747033		0.00192995	0	0	0	0	0	0	0.000912428	0	0	0	0	0	0	0	0	0	0	0	0	0	0	0	0.00174981	0	0	0	0	0	0	0	0	0	0	0	0
188	L	CTT	0	0	0	0	0	0	0	0	0	0	0	0	0	0	0	0	0	0	0	0	0	0	0	0.00395646	0	0	0.00622846	0.00478985	0		0	0	0	0	0	0	0	0	0.000811365	0	0	0	0	0	0	0	0
189	K	AAG	0	0	0	0	0	0	0	0	0	0	0	0	0.000557461	0	0	0	0	0	0	0	0	0	0	0	0.00734439		0	0	0	0	0	0	0.00308342	0.000154328	0.000506432	0	0	0	0	0	0	4.24092e-05	0.0119932	0	0	0	0
190	D	GAT	0	0	0	0	0	0	0	0	0	0.00663515		0.00393644	0	0	0	0	0	0	0.00364483	0	0	0	0	0	0	0	0	0	0	0	0	0	0	0	0.00209136	0	0	0	0	0	0	0	0	0	0	0	0
191	N	AAT	0	0	0	0	0	0	0	0	0	0	0.00222997	0	0	0	0	0	0	0	0	0	0	0	0	0.0129305	0.000951231	0.000203913	0	0	0	0	0	0	0	0.0127035		0	0	0	0	0	0	0	0	0	0	0	0
192	P	CCA	0	0	0	0.00744275	0	0	0	0	0	0	0	0	0	0	0	0	0	0	0	0	0	0	0	0	0	0	0	0	0	0	0	0	0	0	0		0.00053182	0.00651739	0.0143185	0.00183787	0	0	0	0	0	0	0
193	I	ATT	0	0	0	0	0	0	0	0	0	0	0	0	0	0	0.00357599	0	0	0	0	0	0	0.00267246	0.00670407		0	0	0	0	0	0.00580677	0	0	0	0	0.000148814	0	0	0	0	0	0	0	0	0	0	0	0
194	P	CCA	0	0	0	0.00394607	0	0	0	0	0	0	0	0	0	0	0	0	0	0	0	0	0	0	0	0	0	0	0.000280061	0	0	0	0	0	0	0	0		0.000699985	0.010025	0.0021064	0.00111324	0	0	0	0.000460028	0	0	0
195	A	GCT	0	0	0	0.00556586	0.0120905	0.000301218		0	0	0	0	0	0	0	0	0	0	0	0.00236507	0	0	0	0	0	0	0	0	0	0	0	0	0	0	0	0	0	0	0	0.000496741	0	0	0	0	0	0	0	0
196	L	TTA	0	0	0	0	0	0	0	0	0	0	0	0	0	0	0.000141941	0	0	0	0	0	0	0.00290304	0	0	0	0	0.00527759	0	0.000272151	0		0.00269793	0	0	0	0	0	0	0	0	0	0	0	0	0	0	0
197	D	GAT	0	0	0	0	0	0	0.000335635	0	0	0.0013418		0.00265687	0	0	0	0	0	0	0.00492514	0	0	0	0	0	0	0	0	0	0	0	0	0	0	0	0.00248917	0	0	0	0	0	0	0	0	0	0	0	0
198	K	AAA	0	0	0	0	0	0	0	0	0	0	0	0.00291507	0	0	0	0	0	0	0	0	0	0.00103484	0	0		0.00806865	0	0	0	0	0	0	0	0.00406464	0.00254487	0	0	0	0	0	0	0.013456	0	0	0	0	0
199	N	AAT	0	0	0	0	0	0	0	0	0	0	0.000937737	0	0	0	0	0	0	0	0	0	0.000186732	0	0	0	0	0	0	0	0	0	0	0	0	0.00480911		0	0	0	0	0	0	0	0	0	0	0	0
200	K	AAA	0	0	0	0	0	0	0	0	0	0	0	0.000687135	0	0	0	0	0	0	0	0	0	0.00211769	0	0		0.00382548	0	0	0	0	0	0	0	0.000387717	0.000454255	0	0	0	0	0	0	0.0064537	4.70263e-05	0	0	0	0
201	T	ACA	0	0	0	0.0031622	0	0	0	0	0	0	0	0	0	0	0	0	0	0	0	0	0	0	0	0	0	0	0	0	0	0	0	0	0	0	0	0	0	0	0	0	0	0	0	0	0	0	0
202	N	AAT	0	0	0	0	0	0	0	0	0	0	0.000525877	0	0	0	0	0	0	0	0	0	0.00120146	0	0	0	0	0	0	0	0	0	0	0	0	0.00827006		0	0	0	0	0	0	0	0	0	0	0	0
203	G	GGT	0	0	0	0	0	0	0.00116894	0	0	0	0.00137877	0	0	0	0	0.00230986	0.00322785	0		0	0	0	0	0	0	0	0	0	0	0	0	0	0	0	0	0	0	0	0	0	0	0	0	0	0	0	0
204	N	AAT	0	0	0	0	0	0	0	0	0	0	0.00354874	0.000332229	0	0	0	0	0	0	0	0	0	0	0	0.00742359	0.000580216	0	0	0	0	0	0	0	0	0.00461269		0	0	0	0	0	0	0	0	0	0	0	0
205	K	AAA	0	0	0	0	0	0	0	0	0	0	0	0.00409533	0	0	0	0	0	0	0	0	0	0.00262142	0	0		0.00681741	0	0	0	0	0	0	0	0.00401566	0.00920753	0	0	0	0	0	0	0.0123014	0	0	0	0	0
206	C	TGT	0	0	0	0	0	0	0	0.0346834		0	0	0	0	0	0	0	0	0	0	0	0	0	0	0	0	0	0	0	0	0	0	0	0	0	0	0	0	0	0	0	0	0	0	0	0	0	0.000878321
207	I	ATT	0	0	0	0	0	0	0	0	0	0	0	0	0	0	0.00334678	0	0	0	0	0	0	0.0024925	0.00633037		0	0	0	0	0	0.000146429	0	0	0	0	0.00695513	0	0	0	0	0	0	0	0	0	0	0	0
208	Y	TAT	0	0	0	0	0	0	0	0	0.000478858	0	0	0	0	0	0.00206058	0	0	0	0	0	0.00296094	0	0	0	0	0	0	0	0	0	0	0	0	0	0.00043019	0	0	0	0	0	0	0	0	0	0	0	0
209	P	CCT	0	0	0	0	0	0	0.000609839	0	0	0	0	0	0	0	0	0	0	0	0	0	0.00255747	0	0	0	0	0	0	0	0	0.00177609	0	0	0	0	0	0.00429519	0.00357211	0		0	0	0	0	0	0	0	0
210	N	AAT	0	0	0	0	0	0	0	0	0	0	0.000576294	0	0	0	0	0	0	0	0	0	0	0	0	0	0	0	0	0	0	0	0	0	0	0.0172901		0	0	0	0	0	0	0	0	0	0	0	0
211	H	CAC	0	0	0	0	0	0	0	0	0	0	0	0	0	0	0	0	0	0	0		0.0170008	0	0	0	0	0	0	0	0	0	0	0	0	0	0	0	0	0	0	0	0	0	0	0	0.000776018	0	0
212	E	GAA	0	0	0	0	0	0	0	0	0	0	0		0.00252365	0	0	0.000920573	0	0	0	0	0	0	0	0	0.000217287	0	0	0	0	0	0	0	0	0	0	0	0	0	0	0	0	0	0	0	0	0	0
213	Y	TAT	0	0	0	0	0	0	0	0	0.000274027	0	0	0	0	0	0.0025292	0	0	0	0	0	0.00197548	0	0	0	0	0	0	0	0	0	0	0	0	0	0	0	0	0	0	0	0	0	0	0	0	0	0
214	F	TTT	0	0	0	0	0	0	0	0	0	0	0	0	0	0.00650321		0	0	0	0	0	0	0	0	0	0	0	0	0	0	0.00144092	0.000396465	0	0	0	0	0	0	0	0	0	0	0	0	0	0	0	0
215	I	ATA	0	0	0	0	0	0	0	0	0	0	0	0	0	0	0	0	0	0	0	0	0		0.00602202	0.00646659	0.00389695	0	0.000118066	0	0	0	0.0073024	0	0.00340792	0	0	0	0	0	0	0	0	0	0	0	0	0	0
216	G	GGA	0	0	4.02026e-05	0.000562699	0	0	8.26196e-05	0	0	0	0	0.00577937	0	0	0		0.00125107	0.0198121	0.0193809	0	0	0	0	0	0	0	0	0	0	0	0	0	0	0	0	0	0	0	0	0	0	0	0	0	0	0	0
217	S	TCA	0	0	0	0.000290104	0	0	0	0	0	0	0	0	0	0	0	0	0	0	0	0	0	0	0	0	0	0	0	0	0	0	0.00119417	0	0	0	0	0.00858756	0	0	0	0	0	0	0	0	0	0	0
218	Y	TAT	0	0	0	0	0	0	0	0	0.000385033	0	0	0	0	0	0.00205034	0	0	0	0	0	0.00143757	0	0	0	0	0	0	0	0	0	0	0	0	0	0	0	0	0	0	0	0	0	0	0	0	0	0
219	S	TCA	0	0	0	0	0	0	0	0	0	0	0	0	0	0	0	0	0	0	0	0	0	0	0	0	0	0	0	0	0	0	0.000150477	0	0	0	0	0.00111933	0	0	0	0	0	0	0	0	0	0	0
220	T	ACA	0	0	0	0.0111812	0	0	0	0	0	0	0	0	0	0	0	0	0	0	0	0	0	0.00326301	0	0	0	0	0	0	0	0	0	0	0	0	0	0.00377386	0	8.22256e-05	0	0	0	0.000734962	0	0	0	0	0
221	I	ATT	0	0	0	0	0	0	0	0	0	0	0	0	0	0	0.000815883	0	0	0	0	0	0	0.00579858	0.00396652		0	0	0	0	0	0.000372132	0	0	0.00174776	0	0.000543293	0	0	0	0	0	0	0	0	0	0	0	0
222	F	TTT	0	0	0	0	0	0	0	0	0	0	0	0	0	0.0127614		0	0	0	0	0	0	0	0	0	0	0	0	0	0	0.000604664	0	0	0	0	0	0	0	0	0	0	0	0	0	0	0	0	0
223	M	ATG	0	0	0	0	0	0	0	0	0	0	0	0	0	0	0	0	0	0	0	0	0	0.000251179	0	0.000298408	0	6.22597e-05	0	0	0	0	0	0.00264415		0	0	0	0	0	0	0	0	0	0	0	0	0	0
224	S	AGT	0	0	0	0	0	0	0	0	6.78568e-05	0	0	0	0	0	0	0	0	0	0.0037351	0	0	0	0	0	0	0	0	0	0	0	0	0	0	0	7.26948e-05	0	0	0	0	0	0	0	0	0	0	0	0
225	R	AGA	0	0	0	0	0	0	0	0	0	0	0	0	0	0	0	0.000622142	0	0	0	0	0	0	0	0	3.13607e-05	0	0	0	0	0	0	0	0	0	0	0	0	0	0	0	0		0.00290023	0.0012174	0	0	0
226	N	AAT	0	0	0	0	0	0	0	0	0	0	0.00103847	0	0	0	0	0	0	0	0	0	0	0	0	0	0	0	0	0	0	0	0	0	0	0.00343378		0	0	0	0	0	0	0	0	0	0	0	0
227	R	CGT	0	0	0	0	0	0	0	0	0.000176205	0	0	0	0	0	0	0	0	0	0	0	9.88991e-05	0	0	0	0	0	0	0	0	0	0	0	0	0	0	0	0	0	0	0	0	0	0	0.00192575	0.00562014	0
228	V	GTT	0	0	0	0	0	0	0.00171877	0	0	0	0	0	0	0	0	0	0	0	0	0	0	0	0	0.00253753	0	0	0	0	0	0	0	0	0	0	0	0	0	0	0	0	0	0	0	0	0	0	0
229	R	AGA	0	0	0	0	0	0	0	0	0	0	0	0	0	0	0	0.00083215	0	0	0	0	0	0	0	0	0.00137786	0	0	0	0	0	0	0	0	0	0	0	0	0	0	0	0		0.00660638	0.00013526	0	0	0
230	Q	CAA	0	0	0	0	0	0	0	0	0	0	0	0.00212824	0	0	0	0	0	0	0	0.0039792	0.0014526	0	0	0	0.000403954	3.76476e-05	0.000506004	0	0	0	0	0	0	0	0.000850524	0.000175223	0	0	0		0.020564	0	0	0.0117596	0	0	0
231	W	TGG	0	2.96426e-05	3.95269e-05	0	0	0	0	0	0	0	0	0	0	0	0	0	0	0	0	0	0	0	0	0	0	0	0	0	0	0	0	0	0	0	0	0	0	0	0	0	0	0	0	0	0	0.000790735	0
232	N	AAT	0	0	0	0	0	0	0	0	0	6.08924e-05	0.0182107	3.56178e-05	0	0	0	0	0	0	0	0.000263089	6.03286e-05	0	0	0.0009481	0.00148519	0	0	0	0	0	0	0	0	0.00862211		0	0	0	0	0	0	0	0	0	0	0	0
233	E	GAA	0	0	0	0	0	0	0	0	0	0	0.00186498		0.0107914	0	0	0.0018164	0	0	0	0	0	0	0	0	0.000404566	0	0	0	0	0	0	0	0	0	0	0	0	0	0	6.45104e-05	0	0	0	0	0	0	0
234	P	CCA	0	0	0	0.00339723	0	0	0	0	0	0	0	0	0	0	0	0	0	0	0	0	0	0	0	0	0	0	0.000273444	0	0	0	0	0	0	0	0		0.000633206	0.0135525	0.00401438	0.000293918	0	0	0	1.42909e-06	0	0	0
235	A	GCA	0	0	0		0.00054788	0.0120022	0.0151425	0	0	0	0	0	0	0	0	0.000262395	0	0	0	0	0	0	0	0	0	0	0	0	0	0	0	0	0	0	0	0	0	0	0	0	0	0	0	0	0	0	0
236	F	TTC	0	0	0	0	0	0	0	0	0	0	0	0	0		0.00481043	0	0	0	0	0	0	0	0	0	0	0	0	0.000839057	0	0	0	0	0	0	0	0	0	0	0	0	0	0	0	0	0	0	0
237	T	ACA	0	0	0	0.00846244	0	0	0	0	0	0	0	0	0	0	0	0	0	0	0	0	0	0	0	0	0	0	0	0	0	0	0	0	0	0	0	0	0	0	0	0	0	0	0	0	0	0	0
238	V	GTT	0	0	0	0	0	0	0.0011798	0	0	0	0	0	0	0	0	0	0	0	0	0	0	0	7.74885e-05	0.00607605	0	0	0	0	0	5.58754e-05	0	0	0	0	0	0	0	0	0	0	0	0	0	0	0	0	0
239	Q	CAA	0	0	0	0	0	0	0	0	0	0	0	0	0	0	0	0	0	0	0	0	0	0	0	0	0	0	0.00736939	0	0.000210475	0	0	0	0	0	0	0	0	0	0		0.0107225	0	0	0.000902445	0	0	0
240	A	GCA	0	0	0		0.000103343	0.00767286	0.00344234	0	0	0	0	0	0	0	0	0.00137818	0	0	0	0	0	0	0	0	0	0	0	0	0	0	0	0	0	0	0	0	0	0	0	0	0	0	0	0	0	0	0
241	S	TCT	0	0	0	0	0	0	0.000301882	0	0.000406899	0	0	0	0	0	8.04959e-05	0	0	0	0	0	0	0	0	0	0	0	0	0	0	0	0	0	0	0	0	0	0	0	0.000815613	0	0	0	0	0	0	0	0
242	G	GGA	0	0	0	3.66211e-05	0	0	0	0	0	0	0	0	0	0	0		0.000490836	0.0102256	0.00271705	0	0	0	0	0	0	0	0	0	0	0	0	0	0	0	0	0	0	0	0	0	0	4.78363e-05	0	0	0	0	0
243	R	CGA	0	0	0.000149106	0	0	0	0	0	0	0	0	0	0	0	0	0	0	0	0	0	0	0	0	0	0	0	0	0	0	0	0	0	0	0	0	0	0	0	0	0.0002978	0	0.0031144	0		0	0.0125479	0.00744368
244	Q	CAA	0	0	0	0	0	0	0	0	0	0	0	0	0	0	0	0	0	0	0	0.00414813	0.0432066	0	0	0	0	0	0.000977275	0	0	0	0	0	0	0	0	0	0	0	0		0.0135906	0	0	0.00292947	0	0	0
245	C	TGT	0	0	0	0	0	0	0	0.0215742		0	0	0	0	0	0	0	0	0	0	0	0	0	0	0	0	0	0	0	0	0	0	0	0	0	0	0	0	0	0	0	0	0	0	0	0	0	0.000821136
246	Q	CAA	5.23222e-05	0	0	0	0	0	0	0	0	0	0	0	0	0	0	0	0	0	0	0	0	0	0	0	0	0	0	0	0	0	0	0	0	0	0	0	0	0	0		0.00348585	0	0	0.000920138	0	0	0
247	L	TTA	0	0	0	0	0	0	0	0	0	0	0	0	0	1.49555e-05	7.39786e-05	0	0	0	0	0	0	0.00449088	0	0	0	0	0.00549099	0	0	0		0.00562871	0	0	0	0	0	0	0	0	0	0	0	0	0	0	0
248	H	CAC	0	0	0	0	0	0	0	0	0	0	0	0	0	0	0	0	0	0	0		0.0340284	0	0	0	0	0	0	0	0	0	0	0	0	0	0	0	0	0	0	0	0	0	0	0	0.000995703	0	0
249	P	CCC	0	0	0	0	0	0	0	0	0	0	0	0	0	0	0	0	0	0	0	0	0	0	0	0	0	0	0	8.30537e-05	0	0	0	0	0	0	0	0.00341707		0.000653774	0.0109484	0	0	0	0	0	0	0	0
250	Q	CAA	9.0961e-05	0	0	0	0	0	0	0	0	0	0	0	0	0	0	0	0	0	0	2.90528e-05	0.000226385	0	0	0	0.000172216	0	0	0	0	0	0	0	0	0	0	0	0	0	0		0.0110526	0	0	0.000744867	0	0	0
251	A	GCT	0	0	0	0.00232057	0.0102976	0		0	0	0	0	0	0	0	0	0	0	0	0.000575063	0	0	0	0	0	0	0	0	0	0	0	0	0	0	0	0	0	0	0	0	0	0	0	0	0	0	0	0
252	P	CCT	0	0	0	0	0	0	0	0	0	0	0	0	0	0	0	0	0	0	0	0	0.000904167	0	0	0	0	0	0	0	0	0	0	0	0	0	0	0.00673358	0.00977845	0.00111336		0	0	0	0	0	0	0	0
253	V	GTA	0	0	0	0.00318353	0	0	0	0	0	0	0	0.00189182	0	0	0	0	0	0	0	0	0	0.00625397	0	0	0	0	0.00196594	0	0	0	0	0	0	0	0	0	0	0	0	0	0	0	0	0	0	0	0
254	M	ATG	0	0	0	0	0	0	0	0	0	0	0	0	0	0	0	0	0	0	0	0	0	0	0	0	0	0	0	0	0	0	0	0.000217138		0	0	0	0	0	0	0	0	0	0	0	0	0	0
255	L	TTA	0	0	0	0	0	0	0	0	0	0	0	0	0	0	0.00487484	0	0	0	0	0	0	0.00529238	0	0	0	0	0.0149709	0	0	0		0.00495698	0	0	0	0	0	0	0	0	0	0	0	0	0	0	0
256	K	AAA	0	5.05669e-05	0	0	0	0	0	0	0	0	0	0.00405434	0	0	0	0	0	0	0	0	0	0.000570999	0	0		0.0151634	0	0	0	0	0	0	0	0.000759288	0.00127708	0	0	0	0	0.000625917	0	0.0116879	3.48762e-05	0	0	0	0
257	V	GTT	0	0	0	0	0	0	0.00756705	0	0	0	0.000161416	0	0	0	0	0	0	0	0.000144333	0	0	0	0	0.00184413	0	0	0	0	0	0.000298083	0	0	0	0	0	0	0	0	0	0	0	0	0	0	0	0	0
258	S	AGT	0	0	0	0	0	0	0	0	0.00352613	0	0	0	0	0	0	0	0	0	0.00374954	0	0	0	0	3.52859e-05	0	0	0	0	0	0	0	0	0	0	0.00580681	0	0	0	0	0	0	0.000565894	0	0	0	0	0
259	K	AAA	0	0	0	0	0	0	0	0	0	0	0	0.00351507	0	0	0	0	0	0	0	0	0	0.00234436	0	0		0.00133513	0	0	0	0	0	0	0	0.00431237	0.00273796	0	0	0	0	0	0	0.00356553	0	0	0	0	0
260	N	AAT	0	0	0	0	0	0	0	0	0	0	0.00203464	0	0	0	0	0	0	0	0	0	0	0	0	0.00040267	2.78289e-06	0	0	0	0	0	0	0	8.71579e-05	0.00049994		0	0	0	0	0	0	0	0	0	0	0	0
261	L	TTA	0	0	0	0	0	0	0	0	0	0	0	0	0	0	0.000983549	0	0	0	0	0	0	0.00280786	0	0	0	0	0.00206541	0	0	0		0.0025427	0	0	0	0	0	0	0	0	0	0	0	0	0	0	0
262	N	AAT	0	0	0	0	0	0	0	0	0	0	0.000352623	0	0	0	0	0	0	0	0	0	0.000362979	0	0	0	0.00384275	0	0	0	0	0	0	0	0	0.00250677		0	0	0	0	0	0	0	0	0	0	0	0
263	K	AAA	0	0	0	0	0	0	0	0	0	0	0	0.00762066	0	0	0	1.58495e-05	0	0	0	0	0	0.00397824	0	0		0.00522938	0	0	0	0	0	0	0	0	0.000345912	0	0	0	0	0	0	0.00298944	0	0	0	0	0
264	F	TTT	0	0	0	0	0	0	0	0	0	0	0	0	0	0.00693607		0	0	0	0	0	0	0	0	0	0	0	0	0	0	0.000765631	0	0	0	0	0	0	0	0	0	0	0	0	0	0	0	0	0
265	V	GTT	0	0	0	0	0	0	0.00752273	0	0	0	0.00124334	0	0	0	0	0	0	0	0	0	0	0	0	0.00205596	0	0	0	0	0	0	0	0	0	0	0	0	0	0	0	0	0	0	0	0	0	0	0
266	E	GAG	0	0	0	0	0	3.76256e-05	0	0	0	0.00342723	0.0036747	0.00400466		0	0	0	0	0.00245984	0	0	0	0	0	0	0	0.000862529	0	0	0	0	0	0	0	0	0	0	0	0	0	0	0	0	0	0	0	0	0
267	G	GGA	0	0	0	0.000159992	0	0	0	0	0	0	0	0.00307701	0	0	0		0.00143888	0.0213767	0.00315605	0	0	0	0	0	0	0	0	0	0	0	0	0	0	0	0	0	0	0	0	0	0	0.000634187	0	0	0	0	0
268	K	AAA	0	0	0	0	0	0	0	0	0	0	0	0.00608154	0	0	0	0	0	0	0	0.000180296	0	0.000831566	0	0		0.0282267	0	0	0	0	0	0	0	0.00409469	0.00387393	0	0	0	0	0.00115581	0	0.0057435	0	0	0	0	0
269	E	GAA	0	0	0	0.000576663	0	0	0	0	0	0.000286645	0.00188496		0.0085167	0	0	0.00164651	0	0	0	0	0	0	0	0	0.00122759	0	0	0	0	0	0	0	0	0	0	0	0	0	0	0	0	0	0	0	0	0	0
270	H	CAT	0	0	0	0	0	0	0	0	0	0	0.000216246	0	0	0	0	0	0	0	0	0.00890461		0	0	0	0	0	0	0	0.000368263	0.00420524	0	0	0	0	0	0	0	0	0.000137316	0.00229271	0.0030638	0	0	0	0	0	0.00214699
271	L	TTA	0	0	0	0	0	0	0	0	0	0	0	0	0	0	0.000620461	0	0	0	0	0	0	0.000499946	0	0	0	0	0.00721044	0	0.000259196	0		0.00818003	0	0	0	0	0	0	0	0	0	0	0	0	0	0	0
272	Y	TAT	0	0	0	0	0	0	0	0	0.000374189	0	0	0	0	0	0	0	0	0	0	0	0.000536545	0	0	0	0	0	0	0	0	0	0	0	0	0	0	0	0	0	0	0	0	0	0	0	0	0	0
273	R	CGC	0	0	0	0	0	0	0	0.000182382	0	0	0	0	0	0	0	0	0	0	0	0.000268009	0	0	0	0	0	0	0	0	0	0	0	0	0	0	0	0	0	0	0	0	0	0	0	0.00364803		0.000596998	0.00518932
274	R	AGA	0	0	0	0	0	0	0	0	0	0	0	0	0	0	0	0.000914178	0	0	0	0	0	0	0	0	4.643e-05	0	0	0	0	0	0	0	0	0	0	0	0	0	0	0	0		0.0122283	0.000234164	0	0	0
275	L	CTA	0	0	0	0	0	0	0	0	0	0	0	0	0	0	0	0	0	0	0	0	0	0	0	0	0	0		0	0.00869292	0.000107181	0.00635449	0	0	0	0	0.00064475	0	0	0	0	0	0	0	0	0	0	0
276	T	ACG	0	0	0	0	0	0.000977075	0	0	0	0	0	0	0	0	0	0	0	0	0	0	0	0	0	0	0	0	0	0	0	0	0	0	0.000106618	0	0	0	0	0	0	0	0	0	0	0	0	0	0
277	V	GTT	0	0	0	0	0	0	0.00142616	0	0	0	0	0	0	0	0	0	0	0	0	0	0	0.000207991	0	0.00281261	0	0	0	0	0	0.00116797	0	0	0	0	0	0	0	0	0	0	0	0	0	0	0	0	0
278	R	CGG	0	0	0	0	0	0	0	0	0	0	0	0	0	0	0	0	0	0	0	0	0	0	0	0	0	0	0	0	0	0	0	0	0	0	0	0	0	0	0	0	0.000272816	0	0.00594413	0.00624425	0.00361213		0.003964
279	E	GAA	0	0	0	0	0	0	0	0	0	0	0		0.00662642	0	0	0.000994308	0	0	0	0	0	0	0	0	0.000100487	0	0	0	0	0	0	0	0	0	0	0	0	0	0	0	0	0	0	0	0	0	0
280	C	TGT	0	0	0	0	0	0	0	0.0114061		0	0	0	0	0	0	0	0	0	0	0	0	0	0	0	0	0	0	0	0	0	0	0	0	0	0	0	0	0	0	0	0	0	0	0	0	0	0.000614638
281	A	GCA	0	0	0		0.000673556	0.00792883	0	0	0	0	0	0	0	0	0	0.000228673	0	0	0	0	0	0	0	0	0	0	0	0	0	0	0	0	0	0	0	0	0	0	0	0	0	0	0	0	0	0	0
282	R	CGA	0	0	0.000227706	0	0	0	0	0	0	0	0	0	0	0	0	0	0	0	0	0	0	0	0	0	0	0	0	0	0	0	0	0	0	0	0	0	0	0	0	0.0013696	0	0.00142302	0		2.40351e-05	0.00310247	0.00717922
283	V	GTG	0	0	0	2.11552e-05	0	0.00473585	0	0	0	0	0	0	0	0	0	0	0	0	0	0	0	0	0	0	0	0	0.001099	0	0.00310534	0	0	0.0133758	0.000410722	0	0	0	0	0	0	0	0	0	0	0	0	0	0
284	Q	CAA	8.23786e-05	0	0	0	0	0	0	0	0	0	0	0	0	0	0	0	0	0	0	0	0	0	0	0	0	0	0	0	0	0	0	0	0	0	0	0	0	0	0		0.0110018	0	0	0.000685504	0	0	0
285	G	GGA	0	0	0	0	0	0	0	0	0	0	0	1.05303e-05	0	0	0		0.000535195	0.00542714	0.00214244	0	0	0	0	0	0	0	0	0	0	0	0	0	0	0	0	0	0	0	0	0	0	1.05303e-05	0	0	0	0	0
286	F	TTT	0	0	0	0	0	0	0	0	0	0	0	0	0	0.00667105		0	0	0	0	0	0	0	0	0	0	0	0	0	0	0.000935755	0	0	0	0	0	0	0	0	0	0	0	0	0	0	0	0	0
287	P	CCA	0	0	0	0	0	0	0	0	0	0	0	0	0	0	0	0	0	0	0	0	0	0	0	0	0	0	0.000202765	0	0	0	0	0	0	0	0		0.00252526	0.00736482	0.00694734	0.00039732	0	0	0	0	0	0	0
288	D	GAT	0	0	0	0	0	0	0	0	0	0.00396193		0.000319287	0.000777267	0	0	0	0	0	0.000836635	0	0	0	0	0	0	0	0	0	0	0	0	0	0	0	0.00395769	0	0	0	0	0	0	0	0	0	0	0	0
289	D	GAT	0	0	0	0	0	0	0	0	0	0.00717074		0.0314342	0.001502	0	0	0	0	0	0.00197856	0	0	0	0	0	0	0	0	0	0	0	0	0	0	0	0.00194679	0	0	0	0	0	0	0	0	0	0	0	0
290	F	TTT	0	0	0	0	0	0	0	0	0	0	0	0	0	0.00298714		0	0	0	0	0	0	0	0	0	0	0	0	0	0	0.000756692	0	0	0	0	0	0	0	0	0	0	0	0	0	0	0	0	0
291	I	ATT	0	0	0	0	0	0	0	0	0	0	0	0	0	0	0.000328898	0	0	0	0	0	0	0.00593838	0.0095585		0	0	0	0	0	0	0	0	0.001272	0	0.00220036	0	0	0	0	0	0	0	0	0	0	0	0
292	F	TTT	0	0	0	0	0	0	0	0	0.00127752	0	0	0	0	0.0227678		0	0	0	0	0	0	0	0	0.00077518	0	0	0	0	0	0.00839071	0.00119715	0	0	0	0	0	0	0	0	0	0	0	0	0	0	0	0
293	H	CAT	0	0	0	0	0	0	0	0	0	0	0	0	0	0	0	0	0	0	0	0.00971958		0	0	0	0	0	0	0	0	0.00219204	0	0	0	0	7.39466e-05	0	0	0	0	0.00385329	0.000795552	0	0	0	3.40609e-05	0	0.00244123
294	Y	TAC	0	0	0	0	0	0	0	0.000714536	0	0	0	0	0	0	0	0	0	0	0	0.000310912	0	0	0	0	0	0	0	0	0	0	0	0	0	0	0	0	0	0	0	0	0	0	0	0	0	0	0
295	E	GAA	0	0	0	0	0	0	0	0	0	0.0119671	0.00636217		0.00554365	0	0	0.00569543	0	2.26134e-05	0	0	0	4.97167e-05	0	0	0.00585263	0	0	0	0	0	0	0	0	0	0	0	0	0	0	0	0	0	0	0	0	0	0
296	S	AGT	0	0	0	0	0	0	0	0	0.00236584	0	0	0	0	0	0	3.07778e-05	0	0	0.00582732	0	0	0	0	0.000996828	0.00139422	0	0	0	0	0	0	0	0	0	0.015377	0	0	0	0	0	0	0.00468091	0	0	0	0	0.00392962
297	L	TTG	0	0	0	0	0	0	0	0	0	0	0	0	0	0	0	0	0	0	0	0	0	0	0	0	0	0	0	0	0.0095026	0	0.00254883		0.00218056	0	0	0	0	0	0	0	0	0	0	0	0	0	0
298	N	AAT	0	0	0	0	0	0	0	0	0	0	0.00557138	0	0	0	0	0	0	0	2.75717e-05	0	9.94939e-05	0	0	0.000277573	0.00306748	0.00148635	0	0	0	0	0	0	0	0.00808607		0	0	0	0	0	0	0	0	0	0	0	0
299	D	GAT	0	0	0	0	0	0	0.000306353	0	0	0.0201013		0.00137925	5.95861e-05	0	0	0	0	0	0.00165284	0	0	0	0	0	0	0	0	0	0	0	0	0	0	0	0.00402394	0	0	0	0	0	0	0	0	0	0	0	0
300	G	GGT	0	0	0	0	0	0	0.00289368	1.33684e-06	0	0	9.79919e-05	0	0	0	0	0.0123216	0.0107194	0.00223427		0	0	0	0	0	0	0	0	0	0	0	0	0	0	0	0	0	0	0	0	0	0	0	0	0	0	0	0
301	Y	TAT	0	0	0	0	0	0	0	0	0.000556957	0	0	0	0	0	0	0	0	0	0	0	0.000524625	0	0	0	0	0	0	0	0	0	0	0	0	0	0	0	0	0	0	0	0	0	0	0	0	0	0
302	K	AAA	0	0	0	0	0	0	0	0	0	0	0	0.000293676	0	0	0	0	0	0	0	0	0	0.000172776	0	0		0.00838301	0	0	0	0	0	0	0	0.000332144	0.000128812	0	0	0	0	0	0	0.00428888	0	0	0	0	0
303	M	ATG	0	0	0	0	0	0	0	0	0	0	0	0	0	0	0	0	0	0	0	0	0	3.61849e-05	0	0	0	0	0	0	0	0	0	0.00012579		0	0	0	0	0	0	0	0	0	0	0	0	0	0
304	I	ATC	0	0	0	0	0	0	0	0	0	0	0	0	0	0	0	0	0	0	0	0	0	0.00378198		0.0114859	0	0	0	0	0	0	0	0	0	0	0	0	0	0	0	0	0	0	0	0	0	0	0
305	G	GGT	0	0	0	0	0	0	0	0	1.44025e-05	0	0.000128671	0	0	0	0	0.00174556	0.00513361	0.00104282		0	0	0	0	0	0	0	0	0	0	0	0	0	0	0	0	0	0	0	0	0	0	0	0	0	0	0	0
306	N	AAC	0	0	0	0	0	0	0	0	0	0.000646868	0	0	0	0	0	0	0	0	0	0	0	0	0	0	0	0	0	0	0	0	0	0	0		0.0199698	0	0	0	0	0	0	0	0	0	0	0	0
307	A	GCT	0	0	0	0.00353447	0.0074645	0.000685487		0	0	0	0	0	0	0	0	0	0	0	0	0	0	0	0	0	0	0	0	0	0	0	0	0	0	0	0	0	0	0	0	0	0	0	0	0	0	0	0
308	V	GTG	0	0	0	0	0	0.00109183	0	0	0	0	0	0	0	0	0	0	0	0	0	0	0	0	0	0	0	0	0	0	0	0	0	0	0.000533988	0	0	0	0	0	0	0	0	0	0	0	0	0	0
309	P	CCT	0	0	0	0	0	0	0	0	0	0	0	0	0	0	0	0	0	0	0	0	0	0	0	0	0	0	0	0	0	7.91828e-05	0	0	0	0	0	0.00645251	0.00937386	0.00430669		0	0	0	0	0	0	0	0
310	V	GTA	0	0	0	0.00093514	0	0	0	0	0	0	0	0	0	0	0	0	0	0	0	0	0	0.0103445	0	0	0	0	0.00468123	0	0	0	0	0	0	0	0	0	0	0	0	0	0	0	0	0	0	0	0
311	N	AAT	0	0	0	0	0	0	0	0	0	0	0.00226403	0	0	0	0	0	0	0	0	0	6.39959e-05	0	0	0.0026506	0.00491886	0.00371367	0	0	0	0	0	0	0	0.00312813		0	0	0	0	0	0	0	0	0	0	0	0
312	L	TTA	0	0	0	0	0	0	0	0	0	0	0	0	0	0	0	0	0	0	0	0	0	0.00140725	0	0	0	0	0.00185213	0	0	0		0.00489384	0	0	0	0	0	0	0	0	0	0	0	0	0	0	0
313	A	GCA	0	0	0		0.00034089	0.0120132	0.0159504	0	0	0	0	0	0	0	0	0.000661253	0	0	0	0	0	0	0	0	0	0	0	0	0	0	0	0	0	0	0	0	0	0	0	0	0	0	0	0	0	0	0
314	Y	TAT	0	0	0	0	0	0	0	0	0.00371121	0	0	0	0	0	0.0037737	0	0	0	0	0	0.00257078	0	0	0	0	0	0	0	0	0	0	0	0	0	0.000426606	0	0	0	0	0	0	0	0	0	0	0	0
315	E	GAA	0	0	0	0.00194137	0	0	0	0	0	0.00306672	0.00143099		0.00729869	0	0	0.00159266	0	0	0	0	0	0	0	0	0.00101255	0	0	0	0	0	0	0	0	0	0	0	0	0	0	0	0	0	0	0	0	0	0
316	I	ATA	0	0	0	0	0	0	0	0	0	0	0	0	0	0	0	0	0	0	0	0	0		0.00209627	0.00175515	0	0	0.00139202	0	0	0	0.00543871	0	0.00391191	0	0	0	0	0	0	0	0	0	0	0	0	0	0
317	A	GCT	0	0	0	0.00836617	0.00127867	0		0	0	0	0	0	0	0	0	0	0	0	0.00181085	0	0	0	0	0	0	0	0	0	0	0	0	0	0	0	0	0	0	0	0	0	0	0	0	0	0	0	0
318	K	AAG	0	0.000407464	0	0	0	0	0	0	0	0	0	0	0.00301491	0	0	0	0	0	0	0	0	0	0	0	0.00343356		0	0	0	0	0	0	0.00526489	1.1759e-05	0.00207248	0	0	0	0	0	0	0	0.00432055	0	0	0	0
319	T	ACA	0	0	0	0.0025441	0	0	0	0	0	0	0	0	0	0	0	0	0	0	0	0	0	0.00030308	0	0	0	0	0	0	0	0	0	0	0	0	0	8.93562e-06	0	0	0	0	0	0.000660604	0	0	0	0	0
320	I	ATA	0	0	0	0	0	0	0	0	0	0	0	0	0	0	0	0	0	0	0	0	0		0	0.000103693	0	0	0	0	0	0	0.00136454	0	0.00127518	0	0	0	0	0	0	0	0	0	0	0	0	0	0
321	K	AAA	1.47088e-05	0	0	0	0	0	0	0	0	0	0	0.00230022	0	0	0	0	0	0	0	0	0	0.00577415	0	0		0.00662139	0	0	0	0	0	0	0	0.00040662	0.00263886	0	0	0	0	0.00104585	3.28486e-05	0.00259067	0	0	0	0	0
322	S	TCT	0	0	0	0	0	0	0	0	0.00118018	0	0	0	0	0	0.00366028	0	0	0	0	0	0	0	0	0	0	0	0	0	0	0	0	0	0	0	0	0	0	0	0.000762908	0	0	0	0	0	0	0	0
323	A	GCA	0	0	0		0.000798938	0.00245725	0.00295282	0	0	0	0	0	0	0	0	0.00217088	0	0	0	0	0	0.000378971	0	0	0	0	0	0	0	0	0	0	0	0	0	0	0	0	0	0	0	0	0	0	0	0	0
324	L	TTG	0	8.11744e-05	0	0	0	0	0	0	0	0	0	0	0	0.00141334	0.00450779	0	0	0	0	0	0	0	0	0	0	0	0	0	0.00979373	0	0.00382852		0.00739128	0	0	0	0	0	0	0	0	0	0	0	0	0	0
325	E	GAA	0.000873607	0.000725647	6.89113e-07	6.30946e-05	0	0	0	0	0	0.0225854	0.0067246		0.00936597	0	0	0.00968207	0	0	0	0	0	0	0	0	0.00255587	0	0	0	0	0	0	0	0	0	0	0	0	0	0	0	0	0	0	0	0	0	0
326	I	ATT	0	0	0	0	0	0	7.40789e-05	0	0	0	0	0	0	0	0.00304504	0	0	0	0	0	0	0.00363273	0.00685058		2.41174e-05	0	0	0	0	0.00361071	0	0	0	0	0.0114394	0	0	0	0	0	0	0	0	0	0	0	0
327	R	CGT	0	0	0	0	0	0	0	0	0.00879243	0	0	0	0	0	0	0	0	0	0	0	0.00443178	0	0	0	0	0	0	0	0	0.00482311	0	0	0	0	0	0	0	0	0.000538851	0	0	0	0	0.00046415	0.00236223	0
328	K	AAA	0.00117777	0	0	0	0	0	0	0	0	0	0	0.00410125	0	0	0	0	0	0	0	0	0	0	0	0		0.00175436	0	0	0	0	0	0	0	3.16574e-05	0	0	0	0	0	0.000809254	0	0.000903588	0	0	0	0	0
329	G	GGT	0	0	0	0	0	0	0	0	1.74887e-05	0	0.000403337	0	0	0	0	0.000335866	0.00154612	0		0	0	0	0	0	0	0	0	0	0	0	0	0	0	0	0	0	0	0	0	0	0	0	0	0	0	0	0
330	N	AAT	0	0	0	0	0	0	0	0	0	0	0.000609569	0	0	0	0	0	0	0	0	0	0	0	0	4.81998e-06	0.000116101	0	0	0	0	0	0	0	0	0.000886859		0	0	0	0	0	0	0	0	0	0	0	0
331	-	TAG	0.000210802		0	0	0	0	0	0	0	0	0	0	0	0	0	0	0	0	0	0	0	0	0	0	0	0.000117346	0	0	0	0	0	0	0	0	0	0	0	0	0	0	0.00067423	0	0	0	0	0	0
[truncated: 40 more columns]

## Sheet: G17
			TAA	TAG	TGA	GCA	GCC	GCG	GCT	TGC	TGT	GAC	GAT	GAA	GAG	TTC	TTT	GGA	GGC	GGG	GGT	CAC	CAT	ATA	ATC	ATT	AAA	AAG	CTA	CTC	CTG	CTT	TTA	TTG	ATG	AAC	AAT	CCA	CCC	CCG	CCT	CAA	CAG	AGA	AGG	CGA	CGC	CGG	CGT
			-	-	-	A	A	A	A	C	C	D	D	E	E	F	F	G	G	G	G	H	H	I	I	I	K	K	L	L	L	L	L	L	M	N	N	P	P	P	P	Q	Q	R	R	R	R	R	R
2	N	AAT	0	0	0	0	0	0	0	0	0.000611804	0	0.0408459	0	9.67321e-05	0	0	0	0	0	0.00141017	0	0	0	0	0.00179908	0.00283352	0.0022369	0	0	0	0	0	0	0	0.00244722		0	0	0	0	0	0	0	0	0	0	0	0
3	L	TTA	0	0	0	0	0	0	0	0	0	0	0	0	0	0	0	0	0	0	0	0	0	0.00284775	0	0	0	0	0.00446217	0	0	0		0.00700568	0	0	0	0	0	0	0	0	0	0	0	0	0	0	0
4	I	ATT	0	0	0	0	0	0	0	0	0	0	0	0	0	0	0.00044786	0	0	0	0	0	0	0.00869712	0.00738019		0	0	0	0	0	0.000441706	0	0	0	2.04262e-05	0	0	0	0	0	0	0	0	0	0	0	0	0
5	S	AGT	0	0	0	0	0	0	0	0	0	0	0	0	0	0	0	0	0	0	0.000298438	0	0	0	0	0	0	0	0	0	0	0	0	0	0	0	0.000107099	0	0	0	0	0	0	0	0	0	0	0	0
6	L	CTT	0	0	0	0	0	0	0	0	0	0	0	0	0	0	0.000360153	0	0	0	0	0	0	0	0	0.00229746	0	0	0.00702962	0.0140987	0.0215089		0.000151772	1.70804e-05	0	0	0	0	0	0	0.00103136	0	0	0	0	0	0	0	0
7	F	TTT	0	0	0	0	0	0	0	0	0	0	0	0	0	0.0129379		0	0	0	0	0	0	0	0	0	0	0	0	0	0	0.000188516	0	0	0	0	0	0	0	0	0	0	0	0	0	0	0	0	0
8	S	TCA	0	0	0	0.000524289	0	0	0	0	0	0	0	0	0	0	0	0	0	0	0	0	0	0	0	0	0	0	0	0	0	0	0	0	0	0	0	0.00100857	0	0	0	0	0	0	0	0	0	0	0
9	G	GGT	0	0	0	0	0	0	0	0	0.000187282	0	0	0	0	0	0	0.00772541	0.00967692	0.000296883		0	0	0	0	0	0	0	0	0	0	0	0	0	0	0	0	0	0	0	0	0	0	0	0	0	0	0	0
10	A	GCA	0	0	0		0.000612773	0.0056662	0.0273196	0	0	0	0	0	0	0	0	0	0	0	0	0	0	0	0	0	0	0	0	0	0	0	0	0	0	0	0	0	0	0	0	0	0	0	0	0	0	0	0
11	G	GGG	0	0	0	0	0	0	0	0	0	0	0	0	0	0	0	0.0217725	0.00808592		0.00753845	0	0	0	0	0	0	0	0	0	0	0	0	0	0	0	0	0	0	0	0	0	0	0	0	0	0	0	0
12	G	GGA	0	0	0	0	0	0	0	0	0	0	0	0	0	0	0		6.33124e-05	0.0186124	0.0222241	0	0	0	0	0	0	0	0	0	0	0	0	0	0	0	0	0	0	0	0	0	0	0	0	0	0	0	0
13	L	TTA	0	0	0	0	0	0	0	0	0	0	0	0	0	0	0.000271008	0	0	0	0	0	0	0.000378377	0	0	0	0	0.012214	0	0	0		0.00535312	0	0	0	0	0	0	0	0	0	0	0	0	0	0	0
14	D	GAT	0	0	0	0	0	0	0	0	0	0.035813		0.00704344	0.000245868	0	0	0	0	0	0.000735313	0	0	0	0	0	0	0	0	0	0	0	0	0	0	0	1.0388e-05	0	0	0	0	0	0	0	0	0	0	0	0
15	L	CTT	0	0	0	0	0	0	0	0	0	0	0	0	0	0	0.00309412	0	0	0	0	0	0.00134125	0	0	0.00809115	0	0	0.0323362	0.0132521	0.00343471		0.00133807	0	0	0	0	0	0	0	0.000258371	0	0	0	0	0	0	0	2.51024e-05
16	G	GGC	0	0	0	0	0	0	0	0	0	0	0	0	0	0	0	0.0165692		0.00380889	0.0399729	0	0	0	0	0	0	0	0	0	0	0	0	0	0	0	0	0	0	0	0	0	0	0	0	0	0	0	0
17	F	TTC	0	0	0	0	0	0	0	0	0	0	0	0	0		0.0133025	0	0	0	0	0	0	0	8.43297e-05	0	0	0	0	0.00206998	0	0	0	0	0	0	0	0	0	0	0	0	0	0	0	0	0	0	0
18	Q	CAA	0	0	0	0	0	0	0	0	0	0	0	6.62295e-05	0	0	0	0.000108413	0	0	0	0.00150332	0.0244553	0	0	0	0.00667508	0	0.00834173	0	0	0	0	0	0	0	0.000281597	0	0	0	0		0.0193664	0.000102301	0	0.0334637	0	0.000259185	0.000508435
19	K	AAA	0	0	0	0	0	0	0	0	0	0	0	0.0101983	0	0	0	0	0	0	0	0	0	0.011423	0	0		0.0549651	0	0	0	0	0.000603164	0	0.000564893	0.000599852	0.0150553	0	0	0	0	0.00101344	0	0.0137111	0.000912011	0	0	0	0
20	A	GCA	0	0	0		0.00265553	0.0290431	0.0122075	0	0	0	0	6.69774e-05	0	0	0	0	0	0	0	0	0	0	0	0	0	0	0	0	0	0	0	0	0	0	0	0	0	0	0	0	0	0	0	0	0	0	0
21	G	GGA	0	0	0	0	0	0	0	0	8.22207e-05	0	0	0.00266193	0	0	0		3.38385e-05	0.0059647	0.0110204	0	0	0	0	0	0	0	0	0	0	0	0	0	0	0	0	0	0	0	0	0	0	0.000775779	0	0	0	0	0
22	F	TTT	0	0	0	0	0	0	0	0	0.000829846	0	0	0	0	0.00918006		0	0	0	0	0	0	0	0	0	0	0	0	0	0	0.00183681	0.000285901	0	0	0	0	0	0	0	0	0	0	0	0	0	0	0	0
23	R	CGT	0	0	0	0	0	0	0	0	0.00981707	0	0	0	0	0	0	0	0	0	0	0.000263774	0.0538783	0	0	0	0	0	0	0	2.7154e-05	0.00594805	0	0	0	0	0.000212365	0	0.00269265	0	0.00346073	0	0.000156731	0	0	0.00672059	0.00336988	0.00490791
24	I	ATT	0	0	0	0	0	0	0	0	0	0	0	0	0	0	9.23548e-05	0	0	0	0	0	0	0.0437381	0.0230197		0	0	0	0	0	0	0	0	0	0	0	0	0	0	0	0	0	0	0	0	0	0	0
25	I	ATT	0	0	0	0	0	0	0	0	0	0	0	0	0	0	0.00223503	0	0	0	0.000824585	0	0	0.00459449	0.0112056		1.10282e-06	0	0	0	0	0	0	0	0.00457742	0	0.0104404	0	0	0	0	0	0	0	0	0	0	0	0
26	A	GCC	0	0	0	0.0224315		0.000538333	0.0299447	0	0	0	0	0	0	0	0	0	0.00391704	0	0.000326488	0	0	0	0.000488579	5.68466e-05	0	0	0	9.86586e-06	0	0	0	0	0	0	0	0	0	0	0	0	0	0	0	0	0	0	0
27	A	GCA	0	0	0		0.000567347	0.0173582	0.0110698	0	0	0	0	0	0	0	0	0	0	0	0	0	0	0	0	0	0	0	0	0	0	0	0	0	0	0	0	0	0	0	0	0	0	0	0	0	0	0	0
28	N	AAT	0	0	0	0	0	0	0	0	0	0	0.00013752	0	0	0	0	0	0	0	0	0	0	0	0	0.00207309	0	0	0	0	0	0	0	0	0	0.0218281		0	0	0	0	0	0	0	0	0	0	0	0
29	E	GAA	0	0	0	0	0	0	0	0	0	8.33854e-05	0.0187912		0.0269955	0	0	0.000294313	0	0	0	0	0	0	0	0	0	0	0	0	0	0	0	0	0	0	0	0	0	0	0	0	0	0	0	0	0	0	0
30	Y	TAT	0	0	0	0	0	0	0	7.67635e-05	0.0110837	0	0	0	0	0	0.0104168	0	0	0	0	0	0.00303369	0	0	4.62008e-05	0	0	0	0	0	0	0	0	0	0	0.0166112	0	0	0	0	0	0	0	0	0	0	0	6.58483e-05
31	D	GAT	0	0	0	0	0	0	0	0	0	0.0182289		0.00434401	0	0	0	0	0	0	0.000515054	0	0	0	0	0	0	0	0	0	0	0	0	0	0	0	0.00149701	0	0	0	0	0	0	0	0	0	0	0	0
32	K	AAA	0	0	0	0	0	0	0	0	0	0	4.93009e-05	0.0127715	0	0	0	0	0	0	0	0	0	0.00752731	0	0		0.00888452	0	0	0	0	0	0	0	0.0020249	0.00393705	0	0	0	0	0.00112131	0	0.0048503	0	0	0	0	0
33	S	TCA	0	0	0	0.000169921	0	0	0	0	0	0	0	0	0	0	0	0	0	0	0	0	0	0	0	0	0	0	0	0	0	0	0.00341624	0	0	0	0	0.000655922	0	0	0	0	0	0	0	0	0	0	0
34	I	ATA	0	0	0	0	0	0	0	0	0	0	0	0	0	0	0	0	0	0	0	0	0		0.000329079	0.00367283	9.22563e-05	0	0	0	0	0	0.00453073	0	0.00759061	0	0	0	0	0	0	0	0	0	0	0	0	0	0
35	W	TGG	0	0.000207491	0.000120191	0	0	0	0	0	0.000395267	0	0	0	0	0	0	0	0	0	0	0	0	0	0	0	0	0	0	0	0	0	0	0.000695051	0	0	0	0	0	0	0	0	0	0	0.000657166	0	0	0.00085812	0
36	K	AAA	0	0	0	0	0	0	0	0	0	0	1.0717e-06	0.0192814	0	0	0	0	0	0	0	0	0	0.0049981	0	0		0.0106796	0	0	0	0	0	0	0	0.00030668	0.00377643	0	0	0	0	8.37731e-05	0	0.0176468	0	0	0	0	0
37	T	ACA	0	0	0	0.000505781	0	0	0	0	0	0	0	0	0	0	0	0	0	0	0	0	0	0	0	0	0	0	0	0	0	0	0	0	0	0	0	0	0	0	0	0	0	0	0	0	0	0	0
38	Y	TAT	0	0	0	0	0	0	0	0	0.000531127	0	0	0	0	0	0.00318542	0	0	0	0	0	0.00109507	0	0	4.7499e-06	0	0	0	0	0	0	0	0	0	0	0	0	0	0	0	0	0	0	0	0	0	0	0
39	E	GAA	0	0	0	9.20722e-05	0	0	0	0	0	0.000620115	0.00433911		0.0114883	0	0	0.00375743	0	0	0	0	0	0	0	0	0.000618052	0	0	0	0	0	0	0	0	0	0	0	0	0	0	0.000799567	0	0	0	0	0	0	0
40	S	AGT	0	0	0	0	0	0	0	0.00018114	0.0151629	0	6.82066e-06	0	0	0	1.97332e-05	9.07521e-05	0	0	0.00694194	0	0	0	0	0.0074649	0	0	0	0	0	0	0	0	0	0	0.0176206	0	0	0	0	0	0	0.000698734	0	0	0	0	0.00205885
41	N	AAT	0	0	0	0	0	0	0	0	0	0	0.000130288	0	0	0	0	0	0	0	0	0	0	0	0	0	5.60534e-05	0	0	0	0	0	0	0	0	0.00303416		0	0	0	0	0	0	0	0	0	0	0	0
42	H	CAT	0	0	0	0	0	0	0	0	0	0	0	0	0	0	0	0	0	0	0	0.016755		0	0	0	0	0	0	0	0	0.00148012	0	0	0	0	0.00107664	0	0	0	0	0.00234935	0.000320384	0	0	0	0	0	0.00025352
43	S	TCA	0	0	0	0.0109902	0	4.16291e-05	0	0	0	0	0	0	0	0	0	0	0	0	0	0	0	0	0	0	0	0	9.87334e-05	0	0	0	0.00788987	0.000793502	0	0	0	0.0147757	0	0.00173334	0	0	0	0	0	0	0	0	0
44	A	GCT	0	0	0	0.00489977	0.0095438	0		0	0	0	0.000224874	0	0	0	0	0	0	0	0.00470745	0	0	0	0	0	0	0	0	0	0	0	0	0	0	0	0	0	0	0	0.00208866	0	0	0	0	0	0	0	0
45	K	AAA	0	0	0	0	0	0	0	0	0	0	0	0.049486	0	0	0	0	0	0	0	0	0	0.00710896	0	2.81077e-05		0.0111381	0	0	0	0	0	0	0	0.00904804	0.0106396	0	0	0	0	0	0	0.00535204	3.05045e-05	0	0	0	0
46	L	TTG	0	0	0	0	0	0	0	0	0	0	0	0	0	0.000144967	0.000432088	0	0	0	0	0	0	0	0	0	0	0	0.00575454	0	0.00950699	0	0.0111426		0.0109473	0	0	0	0	0	0	0	0	0	0	0	0	0	0
47	I	ATC	0	0	0	0	0	0	0	0	0	0	0	0	0	0.0135984	0.000191551	0	0	0	0	0	0	0.000745163		0.0450839	0	0	0	0.00355988	0	0.000411304	0	0	0.000172401	0.00600756	0	0	0	0	0	0	0	0	0	0	0	0	0
48	K	AAA	0	0	0	0	0	0	0	0	0	0	0	0.00317725	0	0	0	0.000258689	0	0	0	0	0	0.000774988	0	0		0.00695701	0	0	0	0	0	0	0	0.00127546	0.000848867	0	0	0	0	0.000596248	0	0.0053841	3.46685e-05	0	0	0	0
49	G	GGC	0	0	0	0	0.000310925	0	0	0.0110814	0	0.0274827	0.00265702	0	0.000181091	0	0	0.00169218		0.0063645	0.0126647	0	0	0	0	0	0	0	0	0	0	0	0	0	0	0	0	0	0	0	0	0	0	0	0	0	0.00281504	0	0
50	D	GAT	0	0	0	0	0	0	0	0	0	0.00642895		0.00408464	0.000426101	0	0	0	0	0	0.00130744	0	0	0	0	0	0	0	0	0	0	0	0	0	0	0	0.0080784	0	0	0	0	0	0	0	0	0	0	0	0
51	I	ATA	0	0	0	0	0	0	0	0	0	0	0	0	0	0	0	0	0	0	0	0	0		0.000270223	0.00596631	0	0	0	0	0	0	0.012394	0	0.00011312	0	0	0	0	0	0	0	0	0	0	0	0	0	0
52	S	TCT	0	0	0	0.00164472	0	0	0.0198065	0	0.000425219	0	0	0	0	0	0.00566791	0	0	0	0	0	0	0	0	0.000382848	0	0	0	0	0	0	0	0	0	0	0	0	0	0	0.000457753	0	0	0	0	0	0	0	0
53	K	AAA	0	0	0	0	0	0	0	0	0	0	0	0.00471598	0	0	0	0.000800252	0	0	0	0	0	0.00252082	0	0		0.009425	0	0	0	0	0	0	0	0.00093212	0.00153858	0	0	0	0	0	0	0.00904209	0	0	0	0	0
54	I	ATT	0	0	0	0	0	0	0	0	0	0	0	0	0	0.000135677	0.00232375	0	0	0	0	0	0	0.0140632	0.0243843		0	0	0	0	0	0.00708646	2.09976e-05	0	0.000989724	0	0	0	0	0	0	0	0	0	0	0	0	0	0
55	S	TCT	0	0	0	0	0.000774913	0	0.0010155	0	0	0	0	0	0	0	0.00121928	0	0	0	0	0	0	0	0	0	0	0	0	0	0	0	0	0	0	0	0	0	0.000138088	0	0.0204468	0	0	0	0	0	0	0	0
56	S	TCA	0	0	0	0.00360918	0	0	0	0	2.29998e-05	0	0	0	0	0	0	0	0	0	0	0	0	0	0	0	0	0	0	0	0	0	0.00176896	0	0	0	0	0.0132068	0	3.93262e-05	5.33203e-05	0	0	0	0	0	0	0	0
57	D	GAT	0	0	0	0	0	0	0	0	0	0.00674309		0.0210298	0.000752268	0	0	0.00178505	0	0	0.00596257	0	0.00140498	0	0	0	0.000109901	0	0	0	0	0	0	0	0	0	0.00677733	0	0	0	0	0	0	0	0	0	0	0	0
58	E	GAA	0	0	0	3.5248e-05	0	0	0	0	0	0.00189561	0.0180731		0.0162498	0	0	0.00318154	0	0.000186145	1.42516e-05	0	0	0	0	0	0.013493	0	0	0	0	0	0	0	0	0	0	0	0	0	0	0	0	0	0	3.60103e-05	0	0	0
59	F	TTC	0	0	0	0	0	0	0	0	0	0	0	0	0		0.0143773	0	0	0	0	0	0	0	0.00540856	0	0	0	0	0.0103785	0	0	0.000660142	0	0	0	0	0	0	0	0	0	0	0	0	0	0	0	0
60	P	CCT	0	0	0	0	0	0	0	0	0	0	0	0	0	0	0	0	0	0	0	0	0.00153639	0	0	0	0	0	0	0	0	4.57531e-05	0	0	0	0	0	0.0239259	0.0334641	0.000310704		0	0	0	0	0	0	0	0
61	K	AAG	0	0	0	0	0	4.37458e-05	0	0	0	0	0	0.000335759	0.0124585	0	0	0	0	0	0	0	0	6.27385e-05	8.17313e-05	0	0.0397748		0	0	0	0	0	0	0.0148659	0.021124	0.00846056	0	0	0	0	0	0.000357788	0	0.0193766	0	0	0	0
62	C	TGT	0	0	0	0	0	0	0	0.0157944		0	0	0	0	0	4.66397e-05	0	0	0	0.00510421	0	0	0	0	0	0	0	0	0	0	0	0	0	0	0	0	0	0	0	0	0	0	0	0	0	0	0	0.000472515
63	D	GAT	0	0	0	0	0	0	0.000263064	0	0	0.00570363		0.00255234	0.0033696	0	0	0	0	0	0.00407853	0	0.000606927	0	0	0	0	0	0	0	0	0	0	0	0	0	0.00142654	0	0	0	0	0	0	0	0	0	0	0	0
64	G	GGA	0	0	0	0.000224059	0	0	0	0	0	0	0	0	0	0	0		0	0.0314618	0.012244	0	0	0	0	0	0	0	0	0	0	0	0	0	0	0	0	0	0	0	0	0	0	0	0	0	0	0	0
65	I	ATT	0	0	0	0	0	0	0	0	0	0	0	0	0	6.20929e-05	0.000398903	0	0	0	0	0	0	0.00746043	0.00690324		0	0	0	0	0	0.000464059	0.000351923	0	0.00213564	0	0	0	0	0	0	0	0	0	0	0	0	0	0
66	I	ATT	0	0	0	0	0	0	0	0	0	0	0	0	0	0	0	0	0	0	0	0	0	0.0147062	0.00913737		0	0	0	0	0	0	0	0	0	0	0	0	0	0	0	0	0	0	0	0	0	0	0
67	G	GGG	0	0	0	0	0	0	1.90437e-05	0	0	0	0	0	0	0	0	0.0245526	0.000866243		0.0875029	0	0	0	0	0	0	0	0	0	0	0	0	0	0	0	0	0	0	0	0	0	0	0	0	0	0	0	0
68	G	GGG	0	0	0	0	0	0	0	0	0	0	0	0	2.05979e-05	0	0	0.12493	0.00906953		0.00879957	0	0	0	0	0	0	0	0	0	0	0	0	0	0	0	0	0	0	0	0	0	0	0	0	0	0	0	0
69	P	CCG	0	0	0	0	0	0	0	0	0	0	0	0	0	0	0	0	0	0	0	0	0	0	0	0	0	0	0	0	0.000284029	0	0	0	0	0	0	0.0569123	0.00488765		0.0749209	0	0	0	0	0	0	0	0
70	P	CCT	0	0	0	0	0	0	0	0	0	0	0	0	0	0	0	0	0	0	0	0	0	0	0	0	0	0	0	0	0	0	0	0	0	0	0	0.0373297	0.0115657	0.0120135		0	0	0	0	0	0	0	0
71	C	TGT	0	0	0	0	0	0	0	0.019346		0	0	0	0	0	0	0	0	0	0	0	0	0	0	0	0	0	0	0	0	0	0	0	0	0	0	0	0	0	0	0	0	0	0	0	0	0	0.000301373
72	Q	CAA	0	0	0	0	0	0	0	0	0	0	0	0	0	0	0	0	0	0	0	0	0.000410723	0	0	0	0.00059869	0	0	0	0	0	0	0	0	0	0	0	0	0	0		0.0135746	0	0	0.000396264	0	0	0
73	S	TCT	0	0	0	0	0	0	0.000188326	0	0	0	0	0	0	0	0	0	0	0	0	0	0	0	0	0	0	0	0	0	0	0	0	0	0	0	0	0.000146019	0.00180135	0	0.00611857	0	0	0	0	0	0	0	0
74	W	TGG	0	0	0	0	0	0	0	0	0	0	0	0	0	0	0	0	0	0	0	0	0	0	0	0	0	0	0	0	0	0	0	0	0	0	0	0	0	0	0	0	0	0	0	0	0	0.000204957	0
75	S	AGT	0	0	0	0	0	0	0	0	0.000580292	0	0	0	0	0	0	0	0	0	0.000572381	0	0	0	0	0	0	0	0	0	0	0	0	0	0	0	0	0	0	0	0	0	0	0	0	0	0	0	0
76	E	GAG	0	0	0	0	0	0.000875069	0	0	0	0	0.00216509	0.0757181		0	0	0	0	0.00240993	0	0	0	0	0	0	0	0.000942676	0	0	0	0	0	0	0	0	0	0	0	0	0	0	0.00166626	0	0	0	0	0	0
77	G	GGG	0	0	0	0	0	0.000646398	0	0	0	0	0	0	0	0	0	0.00816254	0.00163249		0.00637405	0	0	0	0	0	0	0	0	0	0	0	0	0	0	0	0	0	0	0	0	0	0	0	0.000395109	0	0	0.000159417	0
78	G	GGA	0	0	0	0	0	0	0	0	0	0	0	0	0	0	0		0.00189442	0.0538258	0.0562456	0	0	0	0	0	0	0	0	0	0	0	0	0	0	0	0	0	0	0	0	0	0	0	0	0	0	0	0
79	S	TCT	0	0	0	0	0	0	0.000354076	0	0.000131401	0	0	0	0	0.00186011	0.000772767	0	0	0	0	0	0	0	0	0.00060561	0	0	0	0	0	0	0	0	0	0	0	0	0	0	0.00194886	0	0	0	0	0	0	0	0
80	L	CTT	0	0	0	0	0	0	0	0	0	0	0	0	0	0	0.0022734	0	0	0	0	0	0.0145965	0	0	0.000628426	0	0	0.00626113	0.0193657	0		0	0	0	0	0	0	0	0	0.000972576	0	0	0	0	0	0	0	0.0011115
81	R	AGA	0	0	0	0	0	0	0	0	0	0	0	0	0	0	0	0.00116585	0	0	0	0	0	0.000744982	0	0	0.0086385	0	0	0	0	0	0	0	0	0	8.54428e-05	0	0	0	0	0	0		0.0187041	0.00258739	0	0	0
82	G	GGA	0	0	0	0	0	0	0	0	0	0	0	0	0	0	0		0.000683725	0.011372	0.0165684	0	0	0	0	0	0	0	0	0	0	0	0	0	0	0	0	0	0	0	0	0	0	0	0	0	0	0	0
83	I	ATT	0	0	0	0	0	0	0	0	0	0	0	0	0	0.00013573	0.00464335	0	0	0	4.50538e-05	0	0	0.0220998	0.0410485		0	0	0	0	0	8.95391e-05	0	0	0.00355257	0	0.000824282	0	0	0	0	0	0	0	0	0	0	0	0
84	D	GAT	0	0	0	0	0	0	0	0	0	0.0175096		0.0143336	0.000117383	0	0	0	0.00012659	2.13224e-05	0.00411754	2.64574e-05	0.012123	0	0	0	0	0	0	0	0	0	0	0	0	0	0.0107327	0	0	0	0	0	0	0	0	0	0	0	0
85	D	GAT	0	0	0	0	0	0	0	0	0	0.0485033		0.00397248	0	0	0	0	0	0	0.000305204	0	0	0	0	0	0	0	0	0	0	0	0	0	0	0	7.30664e-05	0	0	0	0	0	0	0	0	0	0	0	0
86	P	CCT	0	0	0	0	0.000137104	0	0.0340729	0	0	0	0.000320643	0	0	0	0.00286539	0	0	0	0	0	0.00579417	0	0	0	0	0	0	3.66532e-05	0.000685242	0.0134011	3.5827e-06	0	0	0	0	0.0186556	0.022655	0.0143139		2.05314e-05	0	0	0	0	0	0	0.00232056
87	R	CGG	0	0	0	0	0	0	0	0	0	0	0	0	0	0	0	0	0	0	0	0	0	0	0	0	0	3.65148e-06	0.000262819	0	0.00262962	0	0	0	2.94454e-05	0	0	0	0	0	0	0	0.0014996	9.7929e-06	0.0172106	0.0298545	0.00562664		0.0096898
88	G	GGC	0	0	0	0	0	0	2.44678e-06	0	0	0.000543025	0	0	0	0	0	0.00102589		0	0.0430141	0	0	0	0	0	0	0	0	0	0	0	0	0	0	0	0	0	0	0	0	0	0	0	0	0	0	0	0
89	K	AAA	0	0	0	0	0	0	0	0	0	0	0	0.00303294	0	0	0	0	0	0	0	0	0	0.00233911	0	0		0.00912412	0	0	0	0	0	0	0	0.000175586	0.000500176	0	0	0	0	0	0	0.0122638	0	0	0	0	0
90	L	CTT	0	0	0	0	0	0	0	0	0	0	0	0	0	0	0.00149831	0	0	0	0	0	0.00120418	0	0	0	0	0	0.0124741	0.00613419	0.0116513		0	0	0	0	0	0	0	0	0.0006171	0	0	0	0	0	0	0	0
91	F	TTT	0	0	0	0	0	0	0	0	0	0	0	0	0	0.0270229		0	0	0	0	0	0	0	0	0.00668486	0	0	0	0	0	0.00143645	0.00290257	0.000475614	0	0	0	0	0	0	0	0	0	0	0	0	0	0	0
92	Y	TAT	0	0	0	0	0	0	0	0	0.00907701	0	0	0	0	0	0.00449162	0	0	0	0	7.17736e-05	0.00154079	0	0	0	0	0	0	0	0	8.04049e-05	0	0	0	0	0	0	0	0	0	0	0	0	0	0	0	0	0
93	E	GAA	0	0	0	0	0	0	0	0	0	0	0.00556373		0.0362867	0	0	0.00108272	0	0	0	6.66401e-05	0	0	0	0	0	0	0	0	0	0	0	0	0	0	0	0	0	0	0	0.000823122	0	0	0	0	0	0	0
94	Y	TAT	0	0	0	0	0	0	0	0	0.000129611	0	0	0	0	0	0.00153463	0	0	0	0	0	0.000425154	0	0	0	0	0	0	0	0	0	0	0	0	0	0	0	0	0	0	0	0	0	0	0	0	0	0
95	I	ATT	0	0	0	0	0	0	0.000139026	0	0	0	0	0	0	0	0.00276157	0	0	0	0	0	0	0.00573644	0.0131184		0	0	0	0	0	0	0	0	0	0.000255053	0.00283385	0	0	0	0	0	0	0	0	0	0	0	0
96	R	CGG	0	0	0	0	0	0	0	0	0	0	0	0	0	0	0	0	0	0	0	0	0	0	0	0	0	0	0	0	0.000166857	0	0	0	0	0	0	0	0	0	0	0	0.000899831	0.000850074	0.00425945	0.0248171	0.0022832		0.00163466
97	I	ATT	0	0	0	0	0	0	0	0	0	0	0	0	0	0	0.0033962	0	0	0	0	0	0	0.00549713	0.0137483		0	0	0	0	0	0	0	0	0.00083755	0	0.000143098	0	0	0	0	0	0	0	0	0	0	0	0
98	L	TTA	0	0	0	0	0	0	0	0	0	0	0	0	0	0	0.0008882	0	0	0	0	0	0	0.0138734	0	0	0	0	0.0223244	0	0	0		0.0319209	0	0	0	0	0	0	0	0	0	0	0	0	0	0	0
99	K	AAA	0	0	0	0	0	0	0	0	0	0	0	0.0110476	0.000655426	0	0	0.000961919	0	0	0	0	0	0.00478149	0	0		0.0224909	0	0	0	0	0	0	0	0.00174255	0.0186472	0	0	0	0	0.0189787	1.73476e-05	0.00937082	5.31947e-05	0	0	0	0
100	Q	CAA	0	0	0	0	0	0	0	0	0	0	0.00433462	0.0186298	0	0	0	0.000129459	0	0	4.51408e-05	0.000126339	0.0105872	0	0	0	0.00040285	0	0.0037803	0	0	0	0	0	0	0	0	0	0	0	0		0.00859962	0	0	0.0410189	0	0	0.000220717
101	K	AAA	0	0	0	0	0	0	0	0	0	0	0	0.00083695	0	0	0	0	0	0	0	0	3.99341e-05	0.00619768	0	0		0.0212262	0	0	0	0	0	0	0	0.0072149	0.00151043	0	0	0	0	0.0022577	0	0.0104543	0	0	0	0	0
102	K	AAA	0	0	0	0.000272898	0	0	0	0	0	0	0	0.0193682	0	0	0	0	0	0	0	0	0	0.0734986	0	0		0.0100763	0	0	0	0	0.000231306	0	2.61843e-05	0.000425181	0.00117194	0	0	0	0	0.0112182	0	0.00419678	9.04621e-05	0	0	0	0
103	P	CCA	0	0	0	0	0	0	0	0	0	0	0	0	0	0	0	0	0	0	0	0	0	0	0	0	0	0	0.000479253	0	0	0	0	0	0	0	0		0.00450266	0.0310011	0.0244419	0	0	0	0	0	0	0	0
104	K	AAA	0	0	0	0	0	0	0	0	0	0	0	0.00387792	0	0	0	7.17453e-05	0	0	0	0	0	0.0213764	0	0		0.00195751	0	0	0	0	0	0	0	0.00280367	0.0283198	0	0	0	0	0.00393471	0	0.027714	0.000111497	0	0	0	0
105	F	TTC	0	0	0	0	0	0	0	0	0	0	0	0	0		0.00266309	0	0	0	0	0	0	0	0.000676539	0	0	0	0	0.000411069	0	0	0.000392178	0	0	0	0	0	0	0	0	0	0	0	0	0	0	0	0
106	F	TTT	0	0	0	0	0	0	0	0	0	0	0	0	0	0.0610342		0	0	0	0	0	0	0	0	0.000111366	0	0	0	0	0	0.00136805	1.80069e-05	2.43008e-05	0	0	0	0	0	0	0	0	0	0	0	0	0	0	0
107	L	CTT	0	0	0	0	0	0	0	0	0	0	0	0	0	0	0.000118613	0	0	0	0	0	0	0	0	0.000458406	0	0	0.00960344	0.0317655	0.00386787		0	0	0	0	0	0	0	0	0.000325216	0	0	0	0	0	0	0	0
108	A	GCC	0	0	0	0.00723294		0.00595908	0.0194196	0	0	0	0	0	0	0	0	0	0	0	0	0	0	0	0	0	0	0	0	0	0	0	0	0	0	0	0	0	0	0	0	0	0	0	0	0	0	0	0
109	E	GAA	0	0	0	0	0	0	0	0	0	0	0		0.0225728	0	0	0	0	0	0	0	0	0	0	0	8.42378e-05	0	0	0	0	0	0	0	0	0	0	0	0	0	0	0	0	0	0	0	0	0	0
110	N	AAC	0	0	0	0	0	0	0	0	0	0.000212243	0	0	0	0	0	0	9.11205e-05	0	0	0	0	0	0	0	0	0	0	0	0	0	0	0	0		0.0174291	0	0	0	0	0	0	0	0	0	0	0	0
111	V	GTT	0	0	0	0	0	0	0.000559175	0	0	0	0	0	0	0	0	0	0	0	0	0	0	0	0	0.00115892	0	0	0	0	0	0	0	0	0	0	0	0	0	0	0	0	0	0	0	0	0	0	0
112	K	AAA	0	0	0	0	0	0	0	0	0	0	0	0.0013236	0	0	0	0	0	0	0	0	0	0.00615181	0	0		0.00722075	0	0	0	0	0	0	0	0.00206909	0.000734195	0	0	0	0	0	0	0.0194289	4.31281e-05	0	0	0	0
113	G	GGA	0	0	0	0	0	0	0	0	0	0	0	0	0	0	0		0.000449598	0.0114062	0.00315416	0	0	0	0	0	0	0	0	0	0	0	0	0	0	0	0	0	0	0	0	0	0	0	0	0	0	0	0
114	M	ATG	0	0	0	0	0	0	0	0	0	0	0	0	0	0	0	0	0	0	0	0	0	0.010458	0.00134697	5.11727e-05	0	0	0	0	0.000154351	0	0	0.000384984		0	0	0	0	0	0	0	0	0	0	0	0	0	0
115	L	CTG	0	0	0	0	0	0	0	0	0	0	0	0	0	0.000126893	0	0	0	0	0	0	0	0.000132859	0	0	0	0	0.0348422	0.00205875		0.00390027	1.95039e-05	0.0191336	0.00705134	0	0	0	0	0.000256003	0	0	0.00130106	0	0	0	0	9.88969e-05	0
116	A	GCT	0	0	0	0.00663237	0.00478128	0.000185163		0	0	0	0.00223776	0	0	0	0	0	0	0	0.000294806	0	0	0	0	0	0	0	0	0	0	0	0	0	0	0	0	0	0	0	0	0	0	0	0	0	0	0	0
117	Q	CAG	0	0	0	0	0	0	0	0	0	0	0	0	0.000299412	0	0	0	0	0	0	0.00102771	0.00286547	0	0	0	0.000150134	0.00217318	0	0	0.00933312	0	0	0	0	0	0	0	0	0.000211375	0	0.0532912		0	0	0.00158873	0	0.0229417	0
118	R	CGT	0	0	0	0	0	0	0	0	0.00629951	0	0	0	0	0	0	0	0	0	9.23848e-05	0	0.00230692	0	0	0	0	0	0	0	0	0.000916046	0	0	0	0	0	0	0	0	0.000559026	0	0	0	0	0.00390597	0.0217228	0.000679708
119	H	CAT	0	0	0	0	0	0	0	0	0	0	0	0	0	0	0	0	0	0	0	0.0566689		0	0	0	0	0	0	0	0	0.000150297	0	0	0	0	0.000274404	0	0	0	0	0.000289178	0	0	0	0	0	0	0.000153252
120	N	AAT	0	0	0	2.97768e-05	0	0	0.00105775	0	0.00234988	0.00108647	0.0111471	0	0	0	0.00210036	0	0	0	8.04921e-05	0	0.0199434	0.000230992	0.00852038	0.0292952	0.0290328	0.00449736	0	0	0	0	0	0	0	0.182273		0	0	0	0	0	0	0.00028743	0	0	0	0	0
121	K	AAG	0	0	0	0	0	0	0	0	0	0.00031462	4.30664e-05	0	0.0133191	0	0	0	0	0.000116952	0	0	0	0	0	0	0.0104951		0	0	0	0	0	0	0.00730367	0.000809409	0.00756947	0	0	0	0	0	0.00364489	0	0.0313434	0	0	0	0
122	A	GCT	0	0	0	0.00571614	0.0109916	0.00310187		0	0	0	0.00382417	0	0	0	0	0	0	0	7.1853e-05	0	0	0	0	0	0	0	0	0	0	0	0	0	0	0	3.80804e-05	0	0	0	0.00326664	0	0	0	0	0	0	0	0
123	V	GTT	0	0	0	0	0	0	0.00206837	0	0	0	0	0	0	0	0.00018185	0	0	0	0.000771747	0	0	0	0	0.0141603	0	0	0	1.21851e-05	0	0.0134028	0	0	0	0	0	0	0	0	0	0	0	0	0	0	0	0	0
124	Q	CAA	0	0	0	0	0	0	0	0	0	0	0	0.0047334	0	0	0	0	0	0	0	0.00122147	0.00443832	0	0	0	0.00346502	0	0.00421537	0	0	0	0	0	0	0	0	0	0	0	0		0.0172242	3.83898e-05	0	0.0364391	0	4.21369e-05	0
125	E	GAA	0	0	0	0.000496374	0	0.000111273	0	0	0	0.0050775	0.0191196		0.0341081	0	0	0.0607249	0	0.000533219	0	0	0	0	0	0	0.00537889	0.000436954	0	0	0	0	0	0	0	0	0.000301104	0	0	0	0	0	0	5.00956e-05	0	0	0	0	0
126	F	TTT	0	0	0	0	0	0	0	0	0.000336889	0	0	0	0	0.00539758		0	0	0	0	0	0	0	0	0.0123719	0	0	0.000252549	2.08548e-05	0	0.0176216	0.000625201	0	0	0	0	0	0	0	0	0	0	0	0	0	0	0	0
127	I	ATC	0	0	0	0	2.39074e-05	0	0	0	0	0	0	0	0	0.00161362	0	0	0	0	0	0	0	0.00195659		0.00832951	0	0	0	0.00726998	0	0	0	0	0.000769319	0.00744847	0	0	0	0	0	0	0	0	0	0	0	0	0
128	Q	CAA	0	0	0	0	0	0	0	0	0	0	0	0.000105373	0	0	0	0	0	0	0	0.00704455	0.00674239	0	0	0	0.000528046	0	0.00467269	0	0	0	0	0	0	0	0	0	0	0	0		0.0117341	0.00174411	0	0.128313	0	0.000345095	9.53332e-05
129	E	GAA	0	0	0	0.000406281	0	0	0	0	0	0.000238843	0.0587416		0.00459309	0	0	0.00382101	0	0	0	0	0	0	0	0	0.0102648	0	0	0	0	0	0	0	0	0	0.000132225	0	0	0	0	0	0	1.80626e-05	0	0	0	0	0
130	F	TTT	0	0	0	0	0	0	0	0	0.000701249	0	0	0	0	0.0135356		0	0	0	0	0	0	0	0	0.00142584	0	0	0	0	0	0.00328406	0.00361423	0.00145918	0	0	0	0	0	0	0	0	0	0	0	0	0	0	0
131	D	GAT	0	0	0	0.000114609	0	0	0.00174927	0	0	0.00647802		0.00922596	0	0	0.000492139	0	0	0	0.00332043	0	0.00489802	0	0	3.74969e-05	0	0	0	0	0	0.00157814	0	0	0	0	0.00388994	0	0	0	0	0	0	0	0	0	0	0	0
132	N	AAT	0	0	0	0	0	0	0	0	0	0	0.0164936	0	0	0	0	0	0	0	0.000257165	0	0.000168585	0.000137319	0	0.0109093	0.0134332	0.0164771	0	0	0	0	0	0	0	0.00655335		0	0	0	0	0	0	0	0.000111469	0	0	0	0
133	A	GCT	0	0	0	0.0129204	0.0153647	0.0129435		0	0	0	0.00208605	2.71729e-05	0	0	0	0	0	0	0.000966443	0	0	0	0	0	0	0	0	0	0	0	0	0	0	0	0	0	0	0	0	0	0	0	0	0	0	0	0
134	G	GGA	0	0	0	0.000359775	0	0	0	0	0	0	4.96429e-05	0.00783042	0	0	0		9.49965e-05	0.00575347	0.0327149	0	0	0	0	0	0	0	0	0	0	0	0	0	0	0	0	0	0	0	0	0	0	0.00663191	0	0.00150455	0	0	0
135	Y	TAT	0	0	0	0	0	0	0	0	8.40153e-05	0	0	0	0	2.5075e-05	0.00686924	0	0	0	0	0	0.000328284	0	0	0	0	0	0	0	0	0	0	0	0	0	0	0	0	0	0	0	0	0	0	0	0	0	0
136	D	GAT	0	0	0	0	0	0	0.000494066	0	0	0.00842207		0.00291664	0.000964904	0	0	0.000116835	6.65286e-05	0	0.0127359	0	0.00358006	0	0	0	0	0	0	0	0	0	0	0	0	0	0.0118563	0	0	0	0	0.000387233	0	0	0	0	0	0	0
137	V	GTC	0	0	0	0	0.00397836	0	0	0	0	0	0	0	0	5.40422e-05	0	0	0	0	0	0	0	0	0.0106062	9.52506e-05	0	0	0	0.00675712	0	0.000354919	0	0	0	0	0	0	0	0	0	0	0	0	0	0	0	0	0
138	H	CAT	0	0	0	0	0	0	0	0	0.000210031	0	0.00394564	0	0	0	0	0	0	0	0	0.00773149		0	0	1.55396e-05	0	0	0	0	0	0.00537695	0	0	0	0	0.0038091	0	0	0	0	0.0069821	0.00032889	0	0	0	9.17486e-05	0	0.0184301
139	I	ATT	0	0	0	0	0	0	5.80889e-05	0	7.37416e-05	0	0	0	0	0	0.0103815	0	0	0	0	0	0	0.000276183	0.0154115		0	0	0	0	0	0.000169745	0	0	0.011071	0	0.00719857	0	0	0	0	0	0	0	0	0	0	0	0
140	I	ATT	0	0	0	0	0	0	2.63228e-05	0	0.000129906	0	1.25116e-05	0	0	0	0.00736226	0	0	0	0	0	0	0.0382562	0.0255338		0.00100614	0	0	0	0	0	0.000502039	0	0.0600532	0.000189754	0.121006	0	0	0	0	0	0	0	0	0	0	0	0
141	L	TTG	0	0	0	0	0	0	0	0	0	0	0	0	0	0.000553308	0.000487742	0	0	0	0	0	0	0.000464403	6.2187e-06	0	0	0.000300487	0.00022087	0	0.0226297	0	0.0329002		0.0472248	0	0	0	0	0	0	0	0	0	0	0	0	0	0
142	L	CTT	0	0	0	0	0	0	0	0	0	0	0	0	0	0.000126437	0.00796272	0	0	0	0	0.00492042	0.000174396	0	0.000108198	0.00102254	0	0	0.00414304	0.112696	0		0	0	0	0	0	0	2.68793e-05	0	0.00176124	0	0	0	0	0	0	0	0.000145516
143	N	AAT	0	0	0	0	0	0	0	0	0	0	0.00119532	0	0	0	0	0	0	0	0	0	0	0	0	0	0	0	0	0	0	0	0	0	0	0.018878		0	0	0	0	0	0	0	0	0	0	0	0
144	A	GCG	0	0	0	0.0127151	0.0227348		0.0133228	0	0	0	0	0	0	0	0	0	0	5.3468e-05	0	0	0	0	0	0	0	0	0	0	0	0	0	0	0	0	0	0	0	0	0	0	0	0	0	0	0	0	0
145	N	AAT	0	0	0	0	0	0	0	0	0	0	0.000573519	0	0	0	0	0	0	0	0	0	4.99447e-06	0	0	0.00356599	0.00361373	0.000493456	0	0	0	0	0	0	0	0.0227805		0	0	0	0	0	0	0	0	0	0	0	0
146	D	GAT	0	0	0	0	0	0	0	0	0	0.0166521		0.00471237	0.000850508	0	0	0	0	0	0.00149912	0	9.86406e-05	0	0	0	0	0	0	0	0	0	0	0	0	0	0.022446	0	0	0	0	0	0	0	0	0	0	0	0
147	Y	TAT	0	0	0	0	0	0	0	0	0.00123593	0	0	0	0	0	0.0259639	0	0	0	0	0	0.0042494	0	0	0	0	0	0	0	0	0	0	0	0	0	0	0	0	0	0	0	0	0	0	0	0	0	0
148	G	GGT	0	0	0	0	0	0	0.00174964	0	0.00266923	0.000108959	0.00985936	0	0	0	0	0.00447675	0.121874	0.0016102		0	0	0	0	0	0	0	0	0	0	0	0	0	0	0	0	0	0	0	0	0	0	0	0	0	0	0	0.000140362
149	V	GTA	0	0	0	0.00338802	0	4.78211e-05	0.000588052	0	0	0	0	0.00638757	0	0	0	0	0	0	0	0	0	0.0109766	0	0	0	0	0.00302936	0	0	0	0.000993446	0	0	0	0	0	0	0	0	0	0	0	0	0	0	0	0
150	A	GCT	0	0	0	0.00967783	0.00890274	0.0163098		0	0	0	0	0	0	0	0	0	0	0	0.000823533	0	0	0	0	0	0	0	0	0	0	0	0	0	0	0	0	0	0	0	0.00519029	0	0	0	0	0	0	0	0
151	Q	CAA	0	0	0	0	0	0	0	0	0	0	0	0	0	0	0	0	0	0	0	0	0	0	0	0	0	0	0	0	0	0	0	0	0	0	0	0	0	0	0		0.0253536	0	0	0.000110811	0	0	0
152	D	GAT	0	0	0	0	0	0	0.000866806	0	0	0.0150143		0.00210696	0	0	8.01523e-05	0	0	0	0.00229809	0	0.0016431	0	0	0.000177189	0	0	0	0	0	0	0	0	0	0	0.00170338	0	0	0	0	0	0	0	0	0	0	0	0
153	R	AGA	0	0	0	0	0	0	0	0	0	0	0	0	0	0	0	0.000172328	0	0	0	0	0	0	0	0	0	0	0	0	0	0	0	0	0	0	0	0	0	0	0	0	0		0.0200432	0.000906326	0	0	0
154	K	AAA	0	0	0	0	0	0	0	0	0	0	0	0.00834933	0	0	0	0	0	0	0	0	0	0.00285237	0	0		0.0104201	0	0	0	0	0	0	0	0.00807752	0.00640249	0	0	0	0	0.00197824	0	0.00830584	0	0	0	0	0
155	R	CGT	0	0	0	0	0	0	0	0	0	0	0	0	0	0	0	0	0	0	0	0	0	0	0	0	0	0	0	0	0	0	0	0	0	0	0	0	0	0	0	0	0	0	0	0.00023738	0.00522971	7.70285e-05
156	V	GTT	0	0	0	0	0	0	0.00250732	0	0	0	0	0	0	0	0	0	0	0	0.000217689	0	0	0	0	0.00209488	0	0	0	0	0	7.73314e-05	0	0	0	0	0	0	0	0	0	0	0	0	0	0	0	0	0
157	F	TTT	0	0	0	0	0	0	0	0	0.000799317	0	0	0	0	0.00913295		0	0	0	0	0	0	0	0	0.00250176	0	0	0	0	0	0.001483	0.00179247	0.00283328	0	0	0	0	0	0	0	0	0	0	0	0	0	0	0
158	Y	TAT	0	0	0	0	0	0	0	0	0.000848281	0	0	0	0	0	0.0128403	0	0	0	0	0	0.000127338	0	0	0	0	0	0	0	0	0	0	0	0	0	0	0	0	0	0	0	0	0	0	0	0	0	0
159	I	ATT	0	0	0	0	0	0	0	0	0	0	0	0	0	0	0.000218347	0	0	0	0	0	0	0.0102338	0.0169667		0	0	0	0	0	0.000105729	0	0	0	0	9.6056e-05	0	0	0	0	0	0	0	0	0	0	0	0
160	G	GGT	0	0	0	0	0	0	0.000312711	0	0	0	0	0	0	0	0	0.00807026	0.0133599	6.56506e-05		0	0	0	0	0	0	0	0	0	0	0	0	0	0	0	0	0	0	0	0	0	0	0	0	0	0	0	0
161	F	TTT	0	0	0	0	0	0	0	0	4.94331e-05	0	0	0	0	0.0363627		0	0	0	0	0	0	0	0	0.000456693	0	0	0	0.000127353	0	0.000973345	0	0	0	0	0	0	0	0	0	0	0	0	0	0	0	0	0
162	R	AGA	0	0	0	0	0	0	0	0	0	0	0	8.0754e-05	0	0	0	0.0431575	0	0	0	0	0	0.00340574	0	0	0.0019091	0	0	0	0	0	0	0	0	0	9.97553e-06	0	0	0	0	0	0		0.0137561	8.94471e-05	0	0	0
163	K	AAA	0	0	0	0	0	0	0	0	0	9.6776e-05	0	0.0105356	0.000219977	0	0	1.40198e-05	0	0	0	5.32201e-05	0	0.00347024	0	0		0.0508336	0	0	0	0	0	0	0.000172688	0.0139473	0.004533	0	0	0	0	0.00619373	0	0.0303965	0.00460357	0	0	0	0
164	E	GAG	0	0	0	0	0	0.00601955	0	0	0	0.000411384	0.000157911	0.00730186		0	0	0	0	0.0130751	0	0	0	0	0	0	2.095e-05	0.00566456	0	0	0	0	0	0	0	0	0	0	0	0	0	0	0	0	2.9669e-05	0	0	0	0
165	L	TTA	0	0	0	0	0	0	0	0	0	0	0	0	0	0.000751963	0.00366535	0	0	0	0	0	0	0.00453905	0	0	0	0	0.022535	0	0	0		0.00828457	0	0	0	0	0	0	0	0	0	0	0	0	0	0	0
166	N	AAT	0	0	0	0	0	0	0	0	0	0	0.00998552	0	0	0	0	0	0	0	0.000494231	0	0.0195806	0	0	0.00595937	0.00144768	3.15682e-05	0	0	0	0	0	0	0	0.0138257		0	0	0	0	0.00233473	8.48137e-05	0	0	0	0	0	0
167	I	ATA	0	0	0	0	0	0	0	0	0	0	0	0	0	0	0	0	0	0	0	0	0		0	0	0.00146682	0	0	0	0	0	0.0108781	1.4861e-05	0.00243006	0	0	0	0	0	0	0	0	0	0	0	0	0	0
168	N	AAT	0	0	0	0	0	0	0	0	0.000306078	0.000397833	0.00461668	0.000243634	0	0	0	0	0	0	0	3.78231e-05	0.00475495	0	0	0.00239036	0.0296179	0.0499467	0	0	0	0	0	0	0	0.141151		0	0	0	0	0.000138498	3.46371e-05	0.000310538	0	0	0	0	0
169	Y	TAT	0	0	0	0	0	0	0	0	0	0	0	0	0	0.00013543	0.00173414	0	0	0	0	0	0.00165758	0	0	0	0	0	0	0	0	0	0	0	0	0	0	0	0	0	0	0	0	0	0	0	0	0	0
170	L	CTT	0	0	0	0	0	0	0	0	0	0	0	0	0	0	0.00128622	0	0	0	0	0.000307474	0.0146575	0	0	0.00334649	0	0	0.0151484	0.0170522	0.000668067		0	0	0	0	0	0	0	0	0.0138988	9.17648e-06	0	0	0	0	0	0	0.000906566
171	P	CCA	0	0	0	0.000165533	0	0	0	0	0	0	0	0	0	0	0	0	0	0	0	0	0	0	0	0	0	0	0.00270138	0	0	0	0	0	0	0	0		0.0102463	0.0116715	0.00675496	0.00236492	0	0	0	0.0077272	0	0	0
172	P	CCC	0	0	0	0	0.000327815	0	0	0	0	0	0	0	0	0	0	0	0	0	0	0.00037829	0	0	0	0	0	0	0	0.00189328	0	8.4353e-06	0	0	0	0	0	0.00155751		0.00283037	0.0190637	0	0	0	0	0	0	0	0
173	I	ATT	0	0	0	0	0	0	0.000152887	0	0	0	0.000654907	0	0	0	0.00373455	0	0	0	8.75713e-05	0	9.34425e-06	0.00863172	0.0292609		0	0	0	0	0	0.0060563	0	0	0.0024609	0	0.00731021	0	0	0	2.50888e-06	0	0	0	0	0	0	0	0
174	P	CCA	0	0	0	0.000361413	0	0	0	0	0	0	0	0	0	0	0	0	0	0	0	0	0.00420095	0	0	0	0	0	0.000358242	0	0	0	0	0	0	0	0		0.000208391	0.0341009	0.0176728	0.00121612	0	0	0	0.00267103	0	0	0
175	H	CAT	0	2.62819e-06	0	0	0	0	0	0	3.45359e-06	0	0.00148054	0	0	0	1.9136e-05	0	0	0	0	0.0139968		0	0	0	0	0	4.05962e-05	0	0	0.00906342	0	0	0	0	0.000253178	0	0	0	0.000106258	0.01565	0.01843	0	0	0.000309674	0	2.07868e-05	0.0140116
176	L	TTG	0	0.000479599	0	0	0	2.81411e-05	0	0	0	0	0	0	0	0.000199993	0	0	0	0	0	0	0	0.00027723	0	0	0	0	3.80386e-05	0	0.0344349	0	0.00487825		0.00682065	0	0	0	0	0.000777058	0	0	0	0	0	0	0	0	0
177	I	ATA	0	0	0	0	0	0	0	0	0	0	0	0	0	0	0	0	0	0	0	0	0		0.000251885	0.00211614	0.00743264	0	0.000127601	0	0	0	0.0048084	0	0.00289964	0	1.32157e-05	0	0	0	0	0	0	0	0	0	0	0	0
178	K	AAG	0	0	0	0	0	0	0	0	0	0	0	0	0.000925477	0	0	0	0	0	0	0	0	0	0	0	0.0180483		0	0	0	0	0	0	0.00190931	0	0.00136918	0	0	0	0	0	0.0011644	0.00011703	0.0151556	0	0	0	0
179	P	CCA	0	0	0	0.000147821	0	0	0	0	0	0	0	0	0	0	0	0	0	0	0	0	0	0	0	0	0	0	0.0086921	0	0	0	0	0	0	0	0		0.0184776	0.00517296	0.0105629	0.000118495	0	0	0	5.553e-05	0	0	0
180	T	ACA	0	0	0	0.00925392	0	0	0	0	0	0	0	0	0	0	0	0	0	0	0	0	0	0.00327048	0	0	0.000644965	0	0	0	0	0	0	0	0	0	0	0	0	0	0.00317284	0	0	0.000388881	0	0	0	0	0
181	L	TTG	0	0	0	0	0	0	0	0	0	0	0	0	0	0	0.00567246	0	0	0	0	0	0	0	0	0	0	0	0.00345436	0	0.0260227	0	0.0102162		0.00792676	0	0	0	0	0	0	0	0	0	0	0	0	0	0
182	K	AAG	0	0.00018753	0	0	0	0	0	0	0	0	0	0	0.00657976	0	0	0	0	0	0	0	0	5.152e-05	0	0	0.0154518		0	0	9.78955e-05	0	0	0	0.00815231	0.000348579	0.00103325	0	0	0	0	0	0.00229635	0	0.0192403	0	0	2.28515e-05	0
183	D	GAC	0	0	0	0	0	0	0	0	0		0.044581	0.00029969	0.000696916	0	0	0	0.00158883	0	0	0.000360298	0	0	0	0	0	0	0	0	0	0	0	0	0	0.00209253	7.49225e-05	0	0	0	0	0	0	0	0	0	0	0	0
184	V	GTC	0	0	0	9.70861e-05	0.0154789	2.22148e-05	0	0	0	0.000313473	0	0	0	0.000326217	0	0	0	0	0	0	0	0	0.010128	0	0	0	0	0.000745178	0	0	0	0	0	0	0	0	0	0	0	0	0	0	0	0	0	0	0
185	I	ATT	0	0	0	0	0	0	0	0	0	0	0	0	0	0	0.00142921	0	0	0	0	0	0	0.0372174	0.0555989		0	0	0	0	0	8.72281e-05	0	0	0.00545036	0	0	0	0	0	0	0	0	0	0	0	0	0	0
186	W	TGG	0	0	0	0	0	0	0	0	0.000614575	0	0	0	0	0	0	0	0	0.000491196	0	0	0	0	0	0	0	0	0	0	0	0	0	0.000413108	0	0	0	0	0	0	0	0	0	0	0.00128769	0	0	0.000520089	0
187	D	GAT	0	0	0	0	0	0	0	0	0	0.0378607		0.00858946	0.000563654	0	0	0	0	0	0.00360903	0	0	0	0	0	0	0	0	0	0	0	0	0	0	0	0.00262403	0	0	0	0	0	0	0	0	0	0	0	0
188	L	CTT	0	0	0	0	0	0	0	0	0	0	0	0	0	0	0.000511694	0	0	0	0	0	0	0	0	0.00282981	0	0	0.00593917	0.0157399	0		0	0	0	0	0	0	0	0	0.000234422	0	0	0	0	0	0	0	0
189	K	AAG	0	0.000128304	0	0	0	0	0	0	0	0	0	0	0.000558641	0	0	0	0	6.41693e-06	0	0	0	0	0	0	0.0111778		0	0	0	0	0	0	0.00478431	0.00118325	0.00371836	0	0	0	0	0	0	5.70018e-05	0.0201753	0	0	0	0
190	D	GAT	0	0	0	0	0	0	0	0	0	0.0133501		0.0138772	0.000438581	0	0	0	0	0	0.0147984	0	0	0	0	0	0	0	0	0	0	0	0	0	0	0	0.0107043	0	0	0	0	0	0	0	0	0	0	0	0
191	N	AAT	0	0	0	0	0	0	0	0	0	0	0.00299483	0	0	0	0	0	0	0	3.33472e-05	0	0.000152162	0	0.00019725	0.0159396	0.00329737	0.00323094	0	0	0	0	0	0	0	0.0181288		0	0	0	0	0	0	0.000553938	0	0	0	0	0
192	P	CCA	0	0	0	0.0393312	0	1.66796e-05	8.04599e-05	0	0	0	0	0	0	0	0	0	0	0	0	0	0	0	0	0	0	0	0.000423008	0	0	0	0	0	0	0	0		0.000812288	0.0121109	0.0111454	0.00127634	0	0	0	0	0	0	0
193	I	ATT	0	0	0	0	0	0	0	0	0	0	0.000264772	0	0	0	0.00287369	0	0	0	0	0	0.000104508	0.0147591	0.0147827		0.000389586	0	0.000242616	0.000677618	0	0.0104696	0	0	0.000576079	0	0.00177326	0	0	0	0	0	0	0	0	0	0	0	0
194	P	CCA	0	0	0	0.000103085	0	0	0	0	0	0	0	0	0	0	0	0	0	0	0	0	0	0	0	0	0	0	0.00074079	0	5.60661e-05	0	0	0	0	0	0		0.000209874	0.0186518	0.00853866	0.000941492	0	0	0	0.00130351	0	0	0
195	A	GCT	0	0	0	0.0164396	0.0312126	0.00273272		0	0	0	1.04518e-05	0	0	0	0	0	0	0	0.00434988	0	0	0	0	0	0	0	0	0	0	0	0	0	0	0	0	0	0	0	0.00017553	0	0	0	0	0	0	0	0
196	L	TTA	0	0	0	0	0	0	0	0	0	0	0	0	0	8.18591e-05	0.000633195	0	0	0	0	0	0	0.00338139	0	0	0	0	0.012067	0	0	0		0.00256788	0	0	0	0	0	0	0	0	0	0	0	0	0	0	0
197	D	GAT	0	0	0	0	0	0	0	0	0	0.00247727		0.00499883	0	0	0	2.20244e-05	0	0	0.0146309	0	0.0018107	0	0	2.0485e-05	0	0	0	0	0	0	0	0	0	0	0.0021209	0	0	0	0	0	0	0	0	0	0	0	1.89456e-05
198	K	AAA	0	0	0	0	0	0	0	0	0	0	2.02857e-05	0.00513595	7.81943e-05	0	0	8.12421e-05	0	0	0	0	0	0.00221767	0	0		0.0103828	0	0	0	0	0	0	0	0.00429476	0.00856094	0	0	0	0	0	0	0.0168564	6.6765e-05	0	0	0	0
199	N	AAT	0	0	0	0	0	0	0	0	0	0	0.00394084	0	0	0	0	0	0	0	0	0	0	0	0	0	0	0	0	0	0	0	0	0	0	0.00657378		0	0	0	0	0	0	0	0	0	0	0	0
200	K	AAA	0	0	0	0	0	0	0	0	0	0	0	0.000419484	0	0	0	0	0	0	0	0	0	0.00472914	0	0		0.0109622	0	0	0	0	0	0	0	0.000342079	0.00425846	0	0	0	0	0	0	0.0180952	0	0	0	0	0
201	T	ACA	0	0	0	0.00282202	0.000101825	0	0	0	0	0	0	0	0	0	0	0	0	0	0	0	0	0	0	0	0	0	0	0	0	0	0	0	0	0	0	8.54426e-05	0	0	0	0	0	0	0.000379288	0	0	0	0
202	N	AAT	0	0	0	0	0	0	0	0	0	0	0.00040253	0	0	0	0	0	0	0	0	0	0.000668151	0	0	7.47596e-05	0.00285442	0	0	0	0	0	0	0	0	0.0102782		0	0	0	0	0	0	0	0	0	0	0	0
203	G	GGT	0	0	0	0	0	0	0.00135947	0	7.15502e-05	0	0.00388847	0	0	0	0	0.0100402	0.00754354	0		0	0	0	0	0	0	0	0	0	0	0	0	0	0	0	0	0	0	0	0	0	0	0	0	0	0	0	0
204	N	AAT	0	0	0	0	0	0	0	0	0	0	0.031006	0	0	0	0	0	0	0	0	0	0	0.000205807	0	0.00311352	0.00527383	0	0	0	0	0	0	0	0	0.00237869		0	0	0	0	0	0	0	0	0	0	0	0
205	K	AAA	0	0	0	0	0	0	0	0	0	0	0	0.00564938	0.000105988	0	0	0	0	0	0	0	0	0.0017134	0	0		0.0501899	0	0	0	0	0	0	1.95898e-05	0.00383259	0.0251679	0	0	0	0	0.00415698	0	0.0151825	0	0.000116583	0	0	0
206	C	TGT	0	0	0	0	0	0	0	0.0518436		0	0	0	0	0	0	0	0	0	0	0	0	0	0	0	0	0	0	0	0	0	0	0	0	0	0	0	0	0	0	0	0	0	0	0	0	0	0.00152888
207	I	ATT	0	0	0	0	0	0	0	0	0	0	0.00010727	0	0	0	0.0111292	0	0	0	0	0	0	0.00909662	0.0257643		0	0	0	0	0	0.00183863	0	0	0.000206356	0.000146986	0.0249887	0	0	0	0	0	0	0	0	0	0	0	0
208	Y	TAT	0	0	0	0	0	0	0	0	0.00774953	0	0.000336982	0	0	0	0.00383754	0	0	0	0	0.0016456	0.00866732	0	0	0	0	0	0	0	0	0.000615119	0	0	0	0	0.000756123	0	0	0	0	0	0	0	0	0	0	0	0.000114929
209	P	CCT	0	0	0	0	0	0	0.000395476	0	0	0	0	0	0	0	0	0	0	0	0	0	0.00486223	0	0	0	0	0	0	0	0	0.00161693	0	0	0	0	6.31723e-05	0.00317439	0.00545821	0		0	0	0	0	0	0	0	0.00228585
210	N	AAT	0	0	0	0	0	0	0	0	0	0	0.000266996	0	0	0	0	0	0	0	0	0	0	0	0	0	0	0	0	0	0	0	0	0	0	0.0255404		0	0	0	0	0	0	0	0	0	0	0	0
211	H	CAC	0	0	0	0	0	0	0	0	0	0	0	0	0	0	0	0	0	0	0		0.0214084	0	0	0	0	0	0	0	0	0	0	0	0	0	0	0	0	0	0	0	0	0	0	0	0.000245828	0	0
212	E	GAA	0	0	0	0	0	0	0	0	0	0	0		0.0151249	0	0	0.000296418	0	0	0	0	0	0	0	0	2.59779e-05	0	0	0	0	0	0	0	0	0	0	0	0	0	0	0	0	0	0	0	0	0	0
213	Y	TAT	0	0	0	0	0	0	0	0	0.000214985	0	0	0	0	0	0.00284146	0	0	0	0	0	0.000402415	0	0	0	0	0	0	0	0	0	0	0	0	0	0	0	0	0	0	0	0	0	0	0	0	0	0
214	F	TTT	0	0	0	0	0	0	0	0	0.000355217	0	0	0	0	0.00579688		0	0	0	0	0	0	0	0	0.000630226	0	0	0	0	0	0.00194193	0	0	0	0	0	0	0	0	0	0	0	0	0	0	0	0	0
215	I	ATA	0	0	0	0	0	0	0	0	0	0	0	0	0	0	0	0	0	0	0	0	0		0.000134564	0.00461148	0.00405285	0	0	0	0	0	0.006247	0	0.016648	0	0.000221761	0	0	0	0	0	0	0	0	0	0	0	0
216	G	GGA	0	0	0	0.00010938	0	0	0.000132065	0	0.00130574	0.000114343	0.000405143	0.00161977	0.000515502	0	0		0.0125058	0.143053	0.131683	0	0	0	0	0	0	0	0	0	0	0	0	0	0	0	0	0	0	0	0	0	0	0	0	0	0	0	0
217	S	TCA	0	0	0	0	0	0	0	0	0	0	0	0	0	0	0	0	0	0	0	0	0	0	0	0	0	0	1.25404e-05	0	0	0	0.00130565	0	0	0	0	0.0143133	0	0.000396252	0.000244533	0	0	0	0	0	0	0	0
218	Y	TAT	0	0	0	0	0	0	0	0	0.00106624	0	0	0	0	0	0.00739873	0	0	0	0	0	0.0016445	0	0	0	0	0	0	0	0	0	0	0	0	0	0	0	0	0	0	0	0	0	0	0	0	0	0
219	S	TCA	0	0	0	0	0	0	0	0	0	0	0	0	0	0	0	0	0	0	0	0	0	0	0	0	0	0	0	0	0	0	0	0	0	0	0	0.000452643	0	0	0	0	0	0	0	0	0	0	0
220	T	ACA	0	0	0	0.00639473	0	0	0	0	0	0	0	0	0	0	0	0	0	0	0	0	0	0.00147102	0	0	0	0	0	0	0	0	0	0	0.000130643	0	0	0.0342394	0	0	0.000209308	1.35393e-05	0	0.00443347	0	0	0	0	0
221	I	ATT	0	0	0	0	0	0	0	0	0	0	0	0	0	0	0.00157149	0	0	0	0	0	0	0.0156515	0.0106319		0	0	0	0	1.21065e-06	0.0031118	0	0	0.012176	0.000290842	0.000520161	0	0	0	0	0	0	0	0	0	0	0	0
222	F	TTT	0	0	0	0	0	0	0	0	0	0	0	0	0	0.0449784		0	0	0	0	0	0	0	0	0	0	0	0	0	0	7.01509e-05	0	0	0	0	0	0	0	0	0	0	0	0	0	0	0	0	0
223	M	ATG	0	0	0	0	0	0	0	0	0	0	0	0	0	0	0	0	0	0	0	0	0	0.000494808	0	0	0	0.000859347	0	0	0.0012606	0	0	0.00163039		0	0	0	0	0	0	0	0	0	0.000234298	0	0	0	0
224	S	AGT	0	0	0	0	0	0	0	0	0.00013153	0	0	0	0	0	0	0	0	0	0.00274112	0	0	0	0	0	0	0	0	0	0	0	0	0	0	0	0	0	0	0	0	0	0	0	0	0	0	0	0
225	R	AGA	0	0	0	0	0	0	0	0	0	0	0	0	0	0	0	0.00020022	0	0	0	0	0	0	0	0	0	0	0	0	0	0	0	0	0	0	0	0	0	0	0	0	0		0.0141942	0	0	0	0
226	N	AAT	0	0	0	0	0	0	0	0	0	0	0.000895689	0	0	0	0	0	0	0	0	0	0	0	0	0	0	0	0	0	0	0	0	0	0	0.0158609		0	0	0	0	0	0	0	0	0	0	0	0
227	R	CGT	0	0	0	0	0	0	0	0	0	0	0	0	0	0	0	0	0	0	0	0	4.81197e-05	0	0	0	0	0	0	0	0	0	0	0	0	0	0	0	0	0	0	0	0	0	0	0.00472264	0.0250837	0.000279273
228	V	GTT	0	0	0	0	0.000111375	0	0.00154316	0	0	0	0	0	0	0	0	0	0	0	0	0	0	0	0	0.00188491	0	0	0	0	0	2.40113e-05	0	0	0	0	0	0	0	0	0	0	0	0	0	0	0	0	0
229	R	AGA	0	0	0	0.00022206	0	0	0	0	0	0	0	0	0	0	0	0.00105612	0	0	0	0	0	0	0	0	0.00187211	0	0	0	0	0	0	0	0	0	0	0	0	0	0	0	0		0.060271	0	0	0	0
230	Q	CAA	0	0	0	0	0	0	0	0	0	0	0	0.00104012	7.72183e-05	0	0	0.00237029	0	0	0	0.000626843	0.0104983	0	0	0	0.00116267	0	0.00487579	0	0	0	6.60053e-05	0	0	0	0	0.000565171	0	0	0		0.0434671	0	0	0.0100562	0	0.000467272	0
231	W	TGG	0	0	0.000195329	0	0	0	0	0	1.6142e-05	0	0	0	0	0	0	0	0	0	0	0	0	0	0	0	0	0	0	0	0	0	0	0	0	0	0	0	0	0	0	0	0	0	0	0	0	0.000233726	0
232	N	AAT	0	0	0	0	0	0	0	0	0	6.7879e-05	0.0369925	0	0	0	0	0	0	0	0.000126877	0.00118807	2.3879e-05	0	0	0.00112854	0.00236673	0	0	0	0	0	0	0	0	0.035273		0	0	0	0	0	0	0	0	0	0	0	0
233	E	GAA	0	0	0	0.00014777	0	0	0	0	0	0	0.00507836		0.0215402	0	0	0.00171053	0	0	0	0	0	0	0	0	0.000732742	0	0	0	0	0	0	0	0	0	0	0	0	0	0	0	0	0	0	0	0	0	0
234	P	CCA	0	0	0	0.00652947	0	0	0	0	0	0	0	0	0	0	0	0	0	0	0	3.92976e-05	0	0	0	0	0	0	0.00460245	0	0	0	0	0	0	0	0		0.00677485	0.0127292	0.0147636	0.000376501	0	0	0	0.000145688	0	0	0
235	A	GCA	0	0	0		0.00251991	0.0243199	0.025825	0	0	0	0	0	0	0	0	0.000351653	0	0	0	0	0	0	0	0	0	0	0	0	0	0	0	0	0	0	0	0	0	0	0	0	0	0	0	0	0	0	0
236	F	TTC	0	0	0	0	0	0	0	0.000195159	0	0	0	0	0		0.013628	0	0	0	0	0	0	0	0	0	0	0	0	0.00155379	0	0	0.000100799	0	0	0	0	0	0	0	0	0	0	0	0	0	0	0	0
237	T	ACA	0	0	0	0.00583164	0	5.54627e-05	0	0	0	0	0	0	0	0	0	0	0	0	0	0	0	0	0	0	0	0	0	0	0	0	0	0	0	0	0	0	0	0	0	0	0	0	0	0	0	0	0
238	V	GTT	0	0	0	0	0	0	0.00127036	0	0	0	0	0	0	0	0	0	0	0	0	0	0	0.00259971	4.71957e-05	0.017097	0	0	0	0	0	0.00010056	0	0	0	0	0	0	0	0	0	0	0	0	0	0	0	0	0
239	Q	CAA	0	0	0	0	0	0	0	0	0	0	0	0	0	0	0	0	0	0	0	0	0.000748697	0	0	0	0	0	0.0126628	0	0	0	0.000391801	0	0	0	0	0	0	0	0		0.010737	0	0	0.000718475	0	0	0
240	A	GCA	0	0	0		0.00258007	0.0144381	0.00887057	0	0	0	0	0	0	0	0	0.000454752	0	0	0	0	0	0	0	0	0	0	0	0	0	0	0	0	0	0	0	0	0	0	0	0	0	0	0	0	0	0	0
241	S	TCT	0	0	0	0	0	0	0	0	0	0	0	0	0	0	0	0	0	0	0	0	0	0	0	0	0	0	0	0	0	0	0	0	0	0	0	0	0	0	0.000303908	0	0	0	0	0	0	0	0
242	G	GGA	0	0	0	0.00472435	0	0	0	0	0	0	0	0.000107875	0	0	0		0	0.0150715	0.00722145	0	0	0	0	0	0	0	0	0	0	0	0	0	0	0	0	0	0	0	0	0	0	0	0	0	0	0	0
243	R	CGA	0	0	8.19657e-05	0	0	0	0	0	0	0	0	0	0	0	0	0	0	0	0	0	0	0	0	0	0	0	0	0	0	0	0	0	0	0	0	0	0	0	0	0.00116742	0	0.00631527	0		0.00320554	0.0136783	0.0121788
244	Q	CAA	0	0	0	0	0	0	0	0	0	0	0	0	0	0	0	0	0	0	0	0.00822363	0.230384	0	0	0	0	0	0.000205716	0	0	0	0	0	0	0	9.57345e-05	0	0	0	0		0.0346829	0	0	0.000436105	0	0	0.00128312
245	C	TGT	0	0	0	0	0	0	0	0.10068		0	0	0	0	0	0	0	0	0	0	0	0	0	0	0	0	0	0	0	0	0	0	0	0	0	0	0	0	0	0	0	0	0	0	0	0	0	0.000242281
246	Q	CAA	0	0	0	0	0	0	0	0	0	0	0	0	0	0	0	0	0	0	0	0	0.000103888	0	0	0	0	0	0	0	0	0	0	0	0	0	0	0	0	0	0		0.019073	0	0	0.000377948	0	0	0
247	L	TTA	0	0	0	0	0	0	0	0	0	0	0	0	0	0	0.000716899	0	0	0	0	0	0	0.00652516	0	0	0	0	0.0195364	0	4.96462e-05	0		0.00684138	0	0	0	0	0	0	0	1.47958e-06	0	0	0	0	0	0	0
248	H	CAC	0	0	0	0	0	0	0	0	0	0	0	0	0	0	0	0	0	0	0		0.142206	0	0	0	0	0	0	0	0	0	0	0	0	0	0	0	0	0	0	0	0	0	0	0	0.000370401	0	0
249	P	CCC	0	0	0	0	0	0	0	0	0	0	0	0	0	0	0	0	0	0	0	0	0	0	0	0	0	0	0	0	0	0	0	0	0	0	0	0.00624202		0.00222925	0.0412888	0	0	0	0	0	0	0	0
250	Q	CAA	0	0	0	0	0	0	0	0	0	0	0	0.000290979	0	0	0	0	0	0	0	4.43499e-05	0.00150768	0	0	0	0.00149453	0.000567373	0.000391823	0	0	0	0	0	0	0	0	0	0	0	0		0.0152488	0	0	0.00152193	0	0	1.27317e-05
251	A	GCT	0	0	0	0.0135375	0.00966793	0.00526454		0	0	0	0	0	0	0	0	0	0	0	1.14824e-05	0	0	0	0	0	0	0	0	0	0	0	0	0	0	0	0	0	0	0	0	0	0	0	0	0	0	0	0
252	P	CCT	0	0	0	0	0	0	0	0	0	0	0	0	0	0	0	0	0	0	0	0	0.0014087	0	0	0	0	0	0	0	0	0.000662638	0	0	0	0	0	0.0172183	0.0222721	0.0152284		0	0	0	0	0	0	0	0
253	V	GTA	0	0	0	0.00563923	0	0	0	0	0	0	0	0.00188469	0	0	0	0.00482454	0	9.61255e-05	0	0	0	0.0142272	0	7.98318e-05	1.23292e-05	0	0.000765077	0	0	0	0.000773224	0	2.0476e-05	0	0	7.98318e-05	0	0	0	0	0	0	0	0	0	0	0
254	M	ATG	0	0	0	0	0	0	0	0	0	0	0	0	0	0	0	0	0	0	0	0	0	0	0	0	0	0	0	0	0	0	0	0.00170137		0	0	0	0	0	0	0	0	0	0	0	0	0	0
255	L	TTA	0	0	0	0	0	0	0	0	0	0	0	0	0	0	0.0153762	0	0	0	0	0	0	0.0130229	0	6.73782e-05	0	0	0.0390196	0	0	0		0.00440084	0	0	0	0.00508594	0	0	3.34505e-05	0	0	0	0	0	0	0	0
256	K	AAA	0	0	0	0	0	0	0	0	0	0	0	0.00490686	0	0	0	0	0	0	0	0	0	0.000299143	0	0		0.0248437	0	0	0	0	0	0	0.000126337	0.00141486	0.00345114	0	0	0	0	0.000306508	0	0.014369	0	0	0	0	0
257	V	GTT	0	0	0	0	0	0	0.00185859	0	0	0	0.00152784	0	0	0	0	0	0	0	0	0	0	0	0	0.00139922	0	0	0	0	0	5.17357e-05	0	0	0	0	0	0	0	0	0	0	0	0	0	0	0	0	0
258	S	AGT	0	0	0	0	0	0	0	0	0.00132893	0	0	0	0	0	0	0	0	0	0.00770745	0	0	0	0	0	0	0	0	0	0	0	0	0	0	0	0.00860186	0	0	0	0	0	0	0.00137482	0	0	0	0	0.000193265
259	K	AAA	0	0	0	0	0	0	0	0	0	0	0	0.00681154	0.00154873	0	0	0	0	0	0	0	0	0.000700257	0	0		0.0051727	0	0	0	0	0	0	0	0.00044732	0.00204304	0	0	0	0	0	0	0.010897	0	0	0	0	0
260	N	AAT	0	0	0	0	0	0	0	0	0	0	0.011678	0	0	0	0	0	0	0	0	0	0	0	0	0.00138185	0.000188988	0.000109998	0	0	0	0	0	0	0	0.00573203		0	0	0	0	0	0	0	0	0	0	0	0
261	L	TTA	0	0	0	0	0	0	0	0	0	0	0	0	0	0	0.000536894	0	0	0	0	0	0	0.000233525	0	0	0	0	0.0055266	0	0	0		0.0330028	0	0	0	0	0	0	0	0	0	0	0	0	0	0	0
262	N	AAT	0	0	0	0	0	0	0	0	0.00305766	0	0	0	0	0	0.000534368	0	0	0	0	0.000414413	0.046527	0	0	0	0.000247922	0	0	0	0	0	0	0	0	0.0138229		0	0	0	0	0	0	0.000758353	0	0	0	0	3.22573e-05
263	K	AAA	0	0	0	0	0	0	0	0	0	0	0	0.00898331	0	0	0	0	0	0	0	0	0	0.00101233	0	0		0.00477096	0	0	0	0	0	0	0	0.000250806	0.000746063	0	0	0	0	1.43607e-05	0	0.00225101	0	0	0	0	0
264	F	TTT	0	0	0	0	0	0	0	0	0	0	0	0	0	0.0101001		0	0	0	0	0	0	0	0	0	0	0	0	0	0	0.000491041	0	0	0	0	0	0	0	0	0	0	0	0	0	0	0	0	0
265	V	GTT	0	0	0	0	9.61609e-05	0	0.00839221	0	0	0	0.000603182	0	0	0	0	0	0	0	0	0	0	0	0	0.00195564	0	0	0	0	0	7.84838e-05	0	0	0	0	0	0	0	0	0	0	0	0	0	0	0	0	0
266	E	GAG	0	0	0	0	0	0	0	0	0	0.0078552	0.0159531	0.01402		0	0	0.000226286	0	0.00756621	0.000283471	0	0	0	0	0	0	0.00327833	0	0	0	0	0	0	0	0	0	0	0	0	0	0	0	0	0	0	0	0	0
267	G	GGA	0	0	0	0	0	0	0	0	0	0	0	0.00254345	0	0	0		0	0.0276744	0.00430135	0	0	0	0	0	0	0	0	0	0	0	0	0	0	0	0	0	0	0	0	0	0	0.00276372	0	0	0	0	0
268	K	AAA	0	0	0	0	0	0	0	0	0	0	0.000151497	0.00622126	0.00121458	0	0	0	0	0	0	0	0	0.000608087	0	0		0.148804	0	0	0	0	0	0	0.00280292	0.00135141	0.00336855	0	0	0	0	0.000789461	0.000937804	0.0133033	0.000394728	0	0	0	0
269	E	GAA	0	0	0	0	0	0	0	0	0	0.000286245	0.00247111		0.0482033	0	0	0.00229898	0	0	0	0	0	0	0	0	0.00204765	0	0	0	0	0	0	0	0	0	0	0	0	0	0	0	0	0	0	0	0	0	0
270	H	CAT	0	0	0	0	0	0	0	0	0	0	0.00620799	0	0	0	0	0	0	0	0	0.0116109		0	0	0	0	0	0	0	0	0.001447	0	0	0	0	5.20219e-06	0	0	0	0	0.00718235	0.00070964	0	0	0	0	0.000140103	0.00450395
271	L	TTA	0	0	0	0	0	0	0	0	0	0	0	0	0	0	0.000326222	0	0	0	0	0	0	0.0007909	0	0	0	0	0.0126608	0	9.73635e-06	0		0.0106144	0	0	0	0	0	0	0	0	0	0	0	0	0	0	0
272	Y	TAT	0	0	0	0	0	0	0	0	0.000151863	0	0	0	0	0	0.000142477	0	0	0	0	0	0.000533166	0	0	0	0	0	0	0	0	0	0	0	0	0	0	0	0	0	0	0	0	0	0	0	0	0	0
273	R	CGC	0	0	0	0	0	0	0	3.60435e-06	0	0	0	0	0	0	0	0	0	0	0	0.00127426	0	0	0	0	0	0	0	0	0	0	0	0	0	0	0	0	0	0	0	0	0	0	0	0.00785509		0.00519621	0.0183794
274	R	AGA	0	0	0	0	0	0	0	0	0	0	0	0	0	0	0	0.000376413	0	0	0	0	0	0	0	0	0.000109368	0	0	0	0	0	0	0	0	0	0	0	0	0	0	0	0		0.0143929	0.0179522	0	0	0
275	L	CTA	0	0	0	0	0	0	0	0	0	0	0	0	0	0	0	0	0	0	0	0	0	2.34298e-05	0	0	0	0		0.00185257	0.00929573	0.000943387	0.0189048	7.45512e-05	0	0	0	0.000150042	0	0	0	0	0	0	0	0	0	0	0
276	T	ACG	0	0	0	0	0	0.000646073	0	0	0	0	0	0	0	0	0	0	0	0	0	0	0	0	0	0	0	0	0	0	0	0	0	0	3.26241e-05	0	0	0	0	0	0	0	0	0	0	0	0	0	0
277	V	GTT	0	0	0	0	0	0	0.00155677	0	0	0	0	0	0	0	0	0	0	0	0	0	0	0	0.00386628	0.0169378	0	0	0	0	0	0.00104334	0	0	0	0	0	0	0	0	0	0	0	0	0	0	0	0	0
278	R	CGG	0	0	0	0	0	0	0	0	0	0	0	0	0	0	0	0	0	0	0	0	0	0	0	0	0	0	0	0	2.20466e-05	0	0	0	0	0	0	0	0	0	0	0	0.000218837	0	0.00833299	0.0179666	0.00162383		0.00301814
279	E	GAA	0	0	0	0	0	0	0	0	0	0	0.000352935		0.0158714	0	0	0.000404347	0	0	0	0	0	0	0	0	0	0	0	0	0	0	0	0	0	0	0	0	0	0	0	0	0	0	0	0	0	0	0
280	C	TGT	0	0	0	0	0	0	0	0.0251463		0	0	0	0	0	0	0	0	0	0	0	0	0	0	0	0	0	0	0	0	0	0	0	0	0	0	0	0	0	0	0	0	0	0	0	0	0	0.000139078
281	A	GCA	0	0	0		0.000144432	0.0265351	0.00224082	0	0	0	0	0	0	0	0	0.00019071	0	0	0	0	0	0	0	0	0	0	0	0	0	0	0	0	0	0	0	0	0	0	0	0	0	0	0	0	0	0	0
282	R	CGA	0	0	9.58791e-05	0	0	0	0	0	0	0	0	0	0	0	0	0	0	0	0	0	0	0	0	0	0	0	4.75833e-05	0	0	0	0	0	0	0	0	0	0	0	0	0.00132041	0	0.000476014	0		0.000105227	0.00601912	0.00972855
283	V	GTG	0	0	0	0	0	0.0010791	0	0	0	0	0	0	0	0	0	0	0	0	0	0	0	0.00276625	0	0	0	0	0.00474897	0	0.0185635	0	0.00216719	0.0493892	0.00163414	0	0	0	0	0	0	0	0	0	0	0	0	0	0
284	Q	CAA	0	0	0	0	0	0	0	0	0	0	0	0	0	0	0	0	0	0	0	0	0.000129964	0	0	0	0	0	2.37216e-05	0	0	0	0	0	0	0	0	0	0	0	0		0.0172414	0	0	0.000200792	0	0	0
285	G	GGA	0	0	0	0.000193784	0	0	0	0	0	0	0	0.000698807	0	0	0		0	0.0114981	0.0102405	0	0	0	0	0	0	0	0	0	0	0	0	0	0	0	0	0	0	0	0	0	0	0	0	0	0	0	0
286	F	TTT	0	0	0	0	0	0	0	0	0	0	0	0	0	0.011993		0	0	0	0	0	0	0	0	0	0	0	0	0	0	0.000336854	0	0	0	0	0	0	0	0	0	0	0	0	0	0	0	0	0
287	P	CCA	0	0	0	0	0	0	0	0	0	0	0	0	0	0	0	0	0	0	0	0	0	0	0	0	0	0	0.000332746	0	0	0	0	0	0	0	0		0.00355442	0.0226442	0.0217938	0.000531508	0	0	0	0	0	0	0
288	D	GAT	0	0	0	0	0	0	8.02597e-05	0	0	0.00233584		0.00156138	0	0	0	0	0	0	0.000699475	0	0	0	0	0	0	0	0	0	0	0	0	0	0	0	0.00236975	0	0	0	0	0	0	0	0	0	0	0	0
289	D	GAT	0	0	0	0	0	0	0	0	0	0.00679634		0.0163646	0.00375486	0	0	0	0	0	0.00201947	0	0	0	0	0	0	0	0	0	0	0	0	0	0	4.87377e-05	0.0061342	0	0	0	0	0	0	0	0	0	0	0	0
290	F	TTT	0	0	0	0	0	0	0	0	5.63649e-05	0	0	0	0	0.016759		0	0	0	0	0	0	0	0	5.26737e-05	0	0	0	0	0	0.000846279	0	0	0	0	0	0	0	0	0	0	0	0	0	0	0	0	0
291	I	ATT	0	0	0	0	0	0	0	0	0.00241649	0	0	0	0	0	0.00081208	0	0	0	0	0	0	0.00768145	0.0399025		0	0	0	0	0	0	0	0	0.00357679	2.49252e-05	0.00884237	0	0	0	0	0	0	0	0	0	0	0	0
292	F	TTT	0	0	0	0	0	0	0	0	0	0	0	0	0	0.0341495		0	0	0	0	0	0	0	5.28035e-06	0.00293838	0	0	0	0	0	0.00634663	0.00152656	1.06401e-07	0	0	0	0	0	0	0	0	0	0	0	0	0	0	0
293	H	CAT	0	0	0	0	0	0	0	0	0	0	0.00758692	0	0	0	0.000568124	0	0	0	0	0.0475919		0	0	0	0	0	0	0	0	0.000137542	0	0	0	0	0.000385188	0	0	0	0	0.00747708	0.00133583	0	0	0	0	0	0.00591131
294	Y	TAC	0	0	0	0	0	0	0	0.000866094	0.000321291	0	0	0	0	6.11469e-05	0	0	0	0	0	0.000181474	0	0	0	0	0	0	0	0	0	0	0	0	0	0	0	0	0	0	0	0	0	0	0	0	0	0	0
295	E	GAA	0	0	0	0	0	0	0	0	0	0.0219194	0.0270754		0.0218595	0	0	0.0030106	0	0.0048137	0	0	1.05821e-05	0	0	0	0.00503577	0	0	0	0	0	0	0	0	0	0	0	0	0	0	0	0	0	0	0	0	0	0
296	S	AGT	0	0	0	0	0	0	0	0	0.0145349	0	0.00110461	0	0	0	0	0.00063756	0	0	0.016327	0	0	0	0	0.000536505	0.00121105	0	0	0	0	0	0	0	0	9.76148e-06	0.0433376	0	0	0	0	0	0	0.0323783	0.000110732	0	0	0	0.00596729
297	L	TTG	0	0	0	0	0	0	0	0	0	0	0	0	0	0	0	0	0	0	0	0	0	0	0	0	0	0	0	0	0.0422197	0	0.00711782		0.00236087	0	0	0	0	0	0	0	0	0	0	0	0	0	0
298	N	AAT	0	0	0	0	0	0	0	0	0	0	0.00804553	0	0	0	0	0	0	0	0	0	0.000972964	0.000174352	0	0.00324519	0.00352075	0.000902982	0	0	0	0	0	0	0	0.00496194		0	0	0	0	0	0	0	0	0	0	0	0
299	D	GAT	0	0	0	0	0	0	0	0	0	0.0188389		0.0069793	2.07548e-05	0	0	0	0	0	0.00107036	0	7.57986e-06	0	0	0	0	0	0	0	0	0	0	0	0	0	0.00717912	0	0	0	0	0	0	0	0	0	0	0	0
300	G	GGT	0	0	0	0	0	0	0.00486912	0	0.000101529	0	0	0	0	0	0	0.0168258	0.0187439	0.00535918		0	0	0	0	0	0	0	0	0	0	0	0	0	0	0	0	0	0	0	0	0	0	0	0	0	0	0	0
301	Y	TAT	0	0	0	0	0	0	0	0	0.000173469	0	0	0	0	0	0	0	0	0	0	0	0.000587883	0	0	0	0	0	0	0	0	0	0	0	0	0	0	0	0	0	0	0	0	0	0	0	0	0	0
302	K	AAA	0	0	0	0	0	0	0	0	0	0	0	5.33055e-05	0	0	0	0	0	0	0	0	0	0.00150807	0	0		0.0147475	0	0	0	0	0	0	0	0.000102168	0.00173017	0	0	0	0	0	0	0.0165887	4.9976e-06	0	0	0	0
303	M	ATG	0	0	0	0	0	0	0	0	0	0	0	0	0	0	0	0	0	0	0	0	0	0.000555452	0.000265758	0	0	0	0	0	0	0	0	0.00117163		0	0	0	0	0	0	0	0	0	0	0	0	0	0
304	I	ATC	0	0	0	0	0	0	0	0	0	0	0	0	0	0	0	0	0	0	0	0	0	0.0329909		0.0152366	0	0	0	0	0	2.87868e-05	0	0	0	0	0	0	0	0	0	0	0	0	0	0	0	0	0
305	G	GGT	0	0	0	0	0	0	0	0	0	0	0	0	0	0	0	0.00224761	0.010004	0		0	0	0	0	0	0	0	0	0	0	0	0	0	0	0	0	0	0	0	0	0	0	0	0	0	0	0	0
306	N	AAC	0	0	0	0	0	0	0	0	0	0.000361425	0	0	0	0	0	0	0	0	0	0	0	0	0	0	0	0	0	0	0	0	0	0	0		0.0362854	0	0	0	0	0	0	0	0	0	0	0	0
307	A	GCT	0	0	0	0.00767385	0.0103741	0.0143412		0	0	0	0	0	0	0	0	0	0	0	0.000581998	0	0	0	0	0	0	0	0	0	0	0	0	0	0	0	0	0	0	0	0	0	0	0	0	0	0	0	0
308	V	GTG	0	0	0	0	0	0.00139932	0	0	0	0	0	0	0	0	0	0	0	0	0	0	0	0.000782232	0	0	0	0	0	0	0	0	0	0	0.00065961	0	0	0	0	0	0	0	0	0	0	0	0	0	0
309	P	CCT	0	0	0	0	0	0	0	0	0	0	0	0	0	0	0	0	0	0	0	0	0.000142223	0	0	0	0	0	0	0	0	0	0	0	0	0	0	0.0309763	0.0126615	0.00628873		0	0	0	0	0	0	0	0
310	V	GTA	0	0	0	0.000463644	0	0	0	0	0	0	0	0	0	0	0	0	0	0	0	0	0	0.0643841	0	0	0	0	0.000846355	0	0	0	0	0	0	0	0	0	0	0	0	0	0	0	0	0	0	0	0
311	N	AAT	0	0	0	0	0	0	0	0	0	0	0.00258011	0	0	0	0	0	0	0	0	0	0	0	0	0.00721204	0.00793612	0.00252553	0	0	0	0	0	0	0	0.00474507		0	0	0	0	0	0	0	0	0	0	0	0
312	L	TTA	0	0	0	0	0	0	0	0	0	0	0	0	0	0	0.000491159	0	0	0	0	0	0	0.00102883	0	0	0	0	0.00807022	0	0	0		0.00825634	0	0	0	0	0	0	0	0	0	0	0	0	0	0	0
313	A	GCA	0	0	0		0.00534358	0.0147722	0.0254025	0	0	0	0	0	0	0	0	0.000772529	0	0	0	0	0	0	0	0	0	0	0	0	0	0	0	0	0	0	0	0	0	0	0	0	0	0	0	0	0	0	0
314	Y	TAT	0	0	0	0	0	0	0	0	0.00607792	0	0	0	0	0	0.0116316	0	0	0	0	0	0.00325825	0	0	0	0	0	0	0	0	2.00689e-05	0	0	0	0	0.00204937	0	0	0	0	0	0	0	0	0	0	0	0
315	E	GAA	0	0	0	0.000132315	0	0	0	0	0	0.00397025	0.00733435		0.0072746	0	0	0.00281275	0	0	0	0	0	0	0	0	0.00102163	0	0	0	0	0	0	0	0	0	0	0	0	0	0	0	0	0	0	0	0	0	0
316	I	ATA	0	0	0	0	0	0	0	0	0	0	0	0	0	0	0	0	0	0	0	0	0		0.0160564	0.0024222	0	0	0.00314772	0	0	0	0.00831705	0	0.0109457	0	0	0	0	0	0	0	0	0	0	0	0	0	0
317	A	GCT	0	0	0	0.0306923	0.00322895	1.57782e-05		0	0	0	0	0	0	0	0	0	0	0	0.00522022	0	0	0	0	0	0	0	0	0	0	0	0	0	0	0	0	0	0	0	0	0	0	0	0	0	0	0	0
318	K	AAG	0	7.7674e-05	0	0	0	0	0	0	0	0	0	0	0.00613481	0	0	0	0	0	0	0	0	0	0	0	0.0234638		0	0	0	0	0	0	0.010291	0.00171031	0.00471338	0	0	0	0	0	0.000160216	1.1225e-05	0.0556941	0	0	0	0
319	T	ACA	0	0	0	0.00291396	0	0	0	0	0	0	0	0	0	0	0	0	0	0	0	0	0	0.00145893	0	0	8.39376e-05	0	0	0	0	0	0	0	0.000126345	0	0	0	0	0	0	0	0	0.000477128	0	0	0	0	0
320	I	ATA	0	0	0	0	0	0	0	0	0	0	0	0	0	0	0	0	0	0	0	0	0		0	0.00289578	0	0	0.00058745	0	0	0	0.00260926	0	0.00145163	0	0	0	0	0	0	0	0	0	0	0	0	0	0
321	K	AAA	0	0	0	0	0	0	0	0	0	0	0	0.00740446	8.49383e-06	0	0	0	0	0	0	0	0	0.00494377	0	0		0.0122644	0	0	0	0	0.000196262	0	0	0.000265788	0.00846152	0	0	0	0	0.00518601	0	0.0102488	0	0	0	0	0
322	S	TCT	0	0	0	0	7.7278e-05	0	0.000886682	0	0.00321788	0	0	0	0	0	0.00831142	0	0	0	0	0	0	0	0	0	0	0	0	0	0	0	0	0	0	0	0	0.000110979	0	0	0.00238697	0	0	0	0	0	0	0	0
323	A	GCA	0	0	0		0.00498265	0.0191461	0.020317	0	0	0	0	0	0	0	0	0.00113747	0	0	0	0	0	2.81199e-05	0	0	0.000106877	0	0	0	0	0	0	0	0	0	0	0.000428664	0	0	0	0	0	0.000560886	0	0	0	0	0
324	L	TTG	0	6.70853e-05	0	0	0	0	0	0	0	0	0	0	0	0.00239206	0.02701	0	0	0	0	0	0	0.000645165	0	0	0	0	0	0	0.0269723	9.64993e-05	0.00887202		0.0140169	0	0	0	0	3.93466e-05	0	0	0	0	0	0	0	0	0
325	E	GAA	0.00124125	0	0.000140289	0	0	0	0	0	0	0.143585	0.0118914		0.0204166	0	0	0.0159182	0.0016871	4.86943e-05	1.7781e-05	0.00280799	0.000257072	0	0	0	0.0140462	0	0	0	0	0	6.93031e-05	0	0	0.000129985	0	0	0	0	0	0	0	0.000341798	0	0	0	0	0
326	I	ATT	0	0	0	0	0	0	0.000217583	0	0	0	3.16355e-05	0	0	0	0.0152594	0	0	0	2.0976e-05	0	0.000256668	0.00539466	0.0114149		0.00013823	0	0	0	0	0.00745904	0	0	0	8.61169e-05	0.0435826	0	0	0	0	0	0	0	0	0	0	0	0.000241271
327	R	CGT	0	0	0	0	0	0	0	8.62155e-05	0.0225302	0	0	0	0	0	0	0	0	0	0.000143394	0.000147915	0.0101173	0	0	0	0	0	0	0	0	0.00311882	0	0	0	0	0	0	0	0	0.00168966	0	0	0	0	0.00509069	0.011685	0.000300791
328	K	AAA	0.00408559	0	0	0	0	0	0	0	0	0	0	0.00318873	0	0	0	4.31579e-05	0	0	0	0	0	0.00853419	0	0		0.00980875	0	0	0	0	0	0	0	0.00420645	0.0129993	0	0	0	0	6.13823e-05	0	0.0159302	0.00336965	0	0	0	0
329	G	GGT	0	0	0	0	0	0	0.00137708	0	0.00815389	0	0.0103857	2.6486e-05	0	0	0	0.00316158	0.00903922	0.000256574		0	0	0	0	0	0	0	0	0	0	0	0	0	0	0	0	0	0	0	0	0	0	0	0	0	0	0	0.000579352
330	N	AAT	0	0	0	0	0	0	0	0	0	0	0.00601915	9.71253e-06	0	0	0	0	0	0	0	0	0	0	1.59845e-05	0.0116231	0.012092	0.00151589	0	0	0	0	0	0	0	0.00885563		0	0	0	0	0	0	0	0	0	0	0	0
331	-	TAG	0.0102325		0	0	0	0	0	0	0	0	0	0	0	0	0	0	0	0	0	0	0	0	0	0	0	0.00866878	0	0	0	0	0	0.00547244	0	0	1.03012e-05	0	0	0	0	0	0.00877399	0	2.11854e-05	0	0	0	0
[truncated: 40 more columns]

## Sheet: Single nt nonSyn
Mutation	f(G0)	Final f(G0)	f(G3)	f(G7)	f(G17)	Wrel G3	Wrel G7	Wrel G17	Orthologs divergence	PROVEAN	SIFT	Positional Rate (μ)	ΔΔG	Distance	Local Closeness		Column	Column name
N2D	0.00190164	0.00190164	0.003925	0.00761881	0.0408459	0.82	0.86	1.02	0.287	-1.795	0.22	0.7916	0.72	20.149	31.56		A	Mutation =	The mutation from M.HaeIII reference sequence.
N2H	9.9453e-05	9.9453e-05	0	0.00162592	0	0	1.21	0	1	-2.022	0.02	0.7916	1.39	20.149	31.56				For example, N2A represent Asparagine in position 2 changed to Alanine
N2I	0.00292684	0.00292684	0.0029329	0.00387419	0.00179908	0.54	0.57	0.38	1	-4.278	0.03	0.7916	-0.58	20.149	31.56
N2K	0.00170972	0.00170972	0.00280786	0.00161298	0.00507042	0.72	0.48	0.74	0.249	0.47	1	0.7916	-0.36	20.149	31.56		B	f(G0) =	The observed frequencies of mutations in the G0 library ( Naïve, unselected library)
N2S	0.000973569	0.000973569	0.00216649	0.0118678	0.0485528	0.85	1.13	1.105	0.451	-1.103	0.27	0.7916	2.07	20.149	31.56		C	Final f(Gn) =	If the observed frequency in G0 was found below the background threshold, then the frequencies of such mutations (in bold) were calculated based on the substitution matrix (Fig. S2a).
N2T	0.000131828	0.000131828	0	0	0	0	0	0	0.334	-1.64	0.38	0.7916	1.39	20.149	31.56				In bolded red - are the 42 mutations that were not observed even in the selected libraries
N2Y	0.0019556	0.0019556	0.00500834	0.0112678	0.00899722	0.92	0.95	0.82	1	-3.534	0.01	0.7916	-0.12	20.149	31.56		D-F	f(Gn) =	Obsereved frequencies in each round of drift of the selected libraries (G3, G7 and G17)
L3F	0.00141246	0.00141246	0	0	0	0	0	0	1	-2.849	0	0.4237	1.34	16.4901	41.39		G-I	Wrel Gn =	Calculated relative fitness effect according to the Equation (1):
L3I	0.00135547	0.00135547	0.00277273	0.00168442	0.00284775	0.82	0.55	0.67	0.281	0.302	0.77	0.4237	0	16.4901	41.39
L3S	0.000671539	0.000671539	1.99591e-05	0	0.000208866	0.02	0	0.23	1	-4.732	0	0.4237	4.18	16.4901	41.39			For the 'f(G0)' we used the 'final f(G0)'
L3V	0.000413828	0.000413828	0.000508735	0.000959909	0.00159366	0.61	0.72	0.79	0.33	-0.463	1	0.4237	0.6	16.4901	41.39
I4F	0.00209093	0.00209093	0	2.54762e-05	0.00044786	0	0.01	0.17	1	-3.632	0	0.4045	2.93	13.5996	41.33				Wrel
I4L	0.000208439	0.000208439	0	0.000673206	0.000441706	0	0.8	0.67	0.303	-1.463	0.25	0.4045	0.52	13.5996	41.33				0	Eliminated
I4M	0.000170789	0.000170789	6.24002e-05	0	0	0.27	0	0	1	-2.228	0.01	0.4045	0.64	13.5996	41.33				0.01-0.3	Highly deleterious
I4N	0.00109321	0.00109321	0	0.000981167	2.04262e-05	0	0.47	0.01	1	-6.187	0	0.4045	3.9	13.5996	41.33				0.31-0.6	Deleterious
I4S	0.000377863	0.000377863	0	0	0	0	0	0	1	-5.087	0	0.4045	4.32	13.5996	41.33				0.61-0.8	Nearly-neutral
I4T	0.00170502	0.00170502	0.00122629	0.00243278	0.00181709	0.44	0.59	0.51	0.674	-3.893	0.04	0.4045	2.55	13.5996	41.33				0.81-1.1	Neutral
I4V	0.0013097	0.0013097	0.00277785	0.00284195	0.0118694	0.83	0.7	0.92	0.249	-0.311	1	0.4045	1.4	13.5996	41.33				>1.1	Beneficial
S5C	0.0012244	0.0012244	0	0	0	0	0	0	1	-4.733	0	0.07755	0.61	9.9739	46.57			Natural Diversity
S5G	0.00109348	0.00109348	0.000612399	0.000520133	0.000298438	0.37	0.32	0.21	0.632	-3.8	0.03	0.07755	0.54	9.9739	46.57		J	Orthologs divergence =	The diversity (1-identity) of the closest ortholog in which the given sequence exchange was found.
S5I	0.000756842	0.000756842	0	0	0	0	0	0	1	-5.733	0	0.07755	-0.91	9.9739	46.57		K	PROVEAN =	Mutation-specific predictor available at at http://provean.jcvi.org; (≤ -2.5 is the recommended threshold for deleterious)
S5N	0.00309462	0.00309462	0	0	0.000107099	0	0	0.03	1	-3	0	0.07755	0.54	9.9739	46.57		L	SIFT=	Mutation-specific predictor available at at http://sift.jcvi.org; (≤ 0.05 is the recommended threshold for deleterious)
S5R	0.00132606	0.00132606	5.36422e-06	0	0	0.002	0	0	1	-4.8	0	0.07755	-1.16	9.9739	46.57		M	Positional Rate (μ) =	Calculated by Rate4Site
S5T	0.000981269	0.000981269	0	0	0	0	0	0	1	-2.867	0	0.07755	-1.24	9.9739	46.57
L6F	0.00118972	0.00118972	0.00015882	2.36701e-05	0.000360153	0.11	0.01	0.23	0.42	-2.5	0.2	0.1195	1.07	7.163	49.03			Biophysical Constraints
L6H	0.00200628	0.00200628	0	0	0	0	0	0	1	-6.1	0	0.1195	3.37	7.163	49.03		N	ΔΔG =	Predicted change in stability upon mutation in the given M.HaeIII stucture computed by FoldX (predicted ΔΔG values using pdb: 1dct)
L6I	0.00118972	0.00118972	0.000983688	0.00220822	0.00229746	0.48	0.66	0.65	1	-1.7	0.01	0.1195	0.55	7.163	49.03				ΔΔG>2 - destabilizing
L6P	0.0079914	0.0079914	0.00181033	0.00189069	0.00103136	0.18	0.19	0.11	1	-6.55	0	0.1195	4.69	7.163	49.03		O	Distance =	Distances of the residues in which the mutations occurred from M.HaeIII’s reaction center
L6R	0.000516726	0.000516726	3.9712e-05	0	0	0.07	0	0	1	-5.55	0	0.1195	3.95	7.163	49.03				Distance ≤ 10 Å relates to catalytic residues
L6V	2.32003e-05	2.32003e-05	0.000562365	0	0	2.3	0	0	1	-2.7	0	0.1195	0.74	7.163	49.03		P	Local Closeness =	The degree of structural connectivity of a residue to other residues.
F7C	0.000765845	0.000765845	1.00474e-05	0	0	0.01	0	0	1	-8	0	0.02172	3.94	4.5568	46.91				Closeness >40 relates to connected residues
F7I	0.00279667	0.00279667	0	0	0	0	0	0	1	-6	0	0.02172	5.3	4.5568	46.91
F7L	0.00410493	0.00410493	0.00047581	0.000453963	0.000188516	0.1	0.09	0.04	1	-6	0	0.02172	2.88	4.5568	46.91
F7S	0.00172069	0.00172069	0.000382845	0.000346278	1.76938e-05	0.18	0.16	0.01	1	-8	0	0.02172	4.25	4.5568	46.91
F7V	0.00141378	0.00141378	6.29124e-06	0	0	0.002	0	0	1	-7	0	0.02172	4.19	4.5568	46.91
F7Y	0.00212139	0.00212139	0.000769728	0.00195379	0.00072309	0.27	0.48	0.25	1	-3	0	0.02172	-0.62	4.5568	46.91
S8A	0.000135048	0.000135048	8.03778e-05	0	0.000524289	0.38	0	0.79	0.33	-0.886	0.45	0.3224	0.33	6.4745	46.65
S8L	0.000988402	0.000988402	9.63448e-05	0.000120539	0	0.08	0.1	0	1	-4.263	0	0.3224	2.37	6.4745	46.65
S8P	0.00166124	0.00166124	0.000839805	0.000840442	0.00100857	0.34	0.33	0.37	1	-3.765	0.01	0.3224	1.35	6.4745	46.65
S8T	0.000824295	0.000824295	0.00129486	0.00365602	0.00215535	0.7	0.88	0.72	0.414	-1.798	0.05	0.3224	-0.16	6.4745	46.65
G9A	0.000534354	0.000534354	0	0	0	0	0	0	1	-6	0	0.02145	-0.59	5.6148	48.33
G9C	0.00292463	0.00292463	0	0	0.000187282	0	0	0.06	1	-9	0	0.02145	-2.61	5.6148	48.33
G9D	0.00267597	0.00267597	0.000116257	0.000118446	0	0.04	0.04	0	1	-7	0	0.02145	-3.57	5.6148	48.33
G9R	0.00065467	0.00065467	0	0	0	0	0	0	1	-8	0	0.02145	-2.57	5.6148	48.33
G9S	0.00233107	0.00233107	0	5.94184e-05	0	0	0.02	0	1	-6	0	0.02145	-2.58	5.6148	48.33
G9V	0.000590501	0.000590501	0	0	0	0	0	0	1	-9	0	0.02145	-0.76	5.6148	48.33
A10E	0.000288882	0.000288882	2.10449e-05	0	0	0.06	0	0	1	-4.833	0.01	0.1235	1.64	7.6215	48.58
A10G	0	0.000348768	6.03865e-05	0	0	0.14	0	0	1	-3.833	0.07	0.1235	1.56	7.6215	48.58
A10P	0.000587063	0.000587063	0	0	0	0	0	0	1	-4.667	0.03	0.1235	-1.72	7.6215	48.58
A10S	0.000434149	0.000434149	9.35809e-05	0	0.000593104	0.17	0	0.57	1	-2.667	0.06	0.1235	1.65	7.6215	48.58
A10T	0.00313307	0.00313307	0.00146193	0.000501886	0.00218099	0.32	0.13	0.41	1	-3.5	0.02	0.1235	0.54	7.6215	48.58
A10V	0.00389764	0.00389764	0.0050568	0.007421	0.00837889	0.63	0.66	0.68	1	-3.5	0.02	0.1235	-1.02	7.6215	48.58
G11A	0.000188486	0.000188486	0	0	0	0	0	0	1	-6	0	0.02145	2.9	8.955	46.97
G11E	0.00184582	0.00184582	6.28975e-05	0.000105011	0	0.03	0.05	0	1	-8	0	0.02145	5.7	8.955	46.97
G11R	0.00409117	0.00409117	0.000172377	0.000150106	0	0.04	0.03	0	1	-8	0	0.02145	4.24	8.955	46.97
G11V	0.000588022	0.000588022	0	0	0	0	0	0	1	-9	0	0.02145	3.59	8.955	46.97
G11W	0.00209738	0.00209738	0	0	0	0	0	0	1	-8	0	0.02145	4.41	8.955	46.97
G12A	0.000466996	0.000466996	0	2.33691e-05	0	0	0.04	0	1	-6	0	0.02145	-0.81	9.3898	47.41
G12E	0.00198562	0.00198562	4.51655e-05	6.00737e-05	0	0.02	0.02	0	1	-8	0	0.02145	-2.04	9.3898	47.41
G12R	0.00230978	0.00230978	0	3.35648e-05	0	0	0.01	0	1	-8	0	0.02145	-0.55	9.3898	47.41
G12V	0.000632391	0.000632391	0	0	0	0	0	0	1	-9	0	0.02145	-1.74	9.3898	47.41
L13F	0.00132656	0.00132656	0	0	0.000271008	0	0	0.16	1	-3.733	0	0.1131	-0.78	9.0455	55.08
L13I	0.001469	0.001469	0.000994014	9.33098e-05	0.000378377	0.42	0.05	0.2	1	-1.867	0.01	0.1131	0.64	9.0455	55.08
L13S	0.00128912	0.00128912	0.000547756	0.000571601	0.000186903	0.3	0.3	0.12	0.645	-5.6	0.06	0.1131	2.96	9.0455	55.08
L13V	0.000344741	0.000344741	0.000315642	0.000122743	0	0.51	0.26	0	1	-2.733	0	0.1131	2.63	9.0455	55.08
D14A	9.48192e-05	9.48192e-05	0	0	0	0	0	0	1	-8	0	0.01564	1.59	10.2643	45.81
D14E	0.00403751	0.00403751	0.00225368	0.00979098	0.00728931	0.37	0.73	0.64	1	-4	0	0.01564	-0.93	10.2643	45.81
D14G	0.00196184	0.00196184	0.000758481	0.000744578	0.000735313	0.28	0.27	0.27	1	-7	0	0.01564	3.22	10.2643	45.81
D14H	0.000284557	0.000284557	0	0	0	0	0	0	1	-7	0	0.01564	7.97	10.2643	45.81
D14N	0.00174174	0.00174174	4.63739e-05	5.79014e-05	1.0388e-05	0.02	0.03	0.005	1	-5	0	0.01564	2.11	10.2643	45.81
D14V	0.00327482	0.00327482	0	0	8.83456e-05	0	0	0.02	1	-9	0	0.01564	0.26	10.2643	45.81
D14Y	0.00152923	0.00152923	0	0	0	0	0	0	1	-9	0	0.01564	0.86	10.2643	45.81
L15F	0.00214521	0.00214521	0.00360806	0.00363434	0.00309412	0.73	0.63	0.59	1	-3.975	0	0.1974	0.72	13.4944	50.54
L15H	0.00230978	0.00230978	0.00170605	0.000935931	0.00134125	0.44	0.28	0.36	1	-6.933	0	0.1974	2.68	13.4944	50.54
L15I	0.00201982	0.00201982	0.00319631	0.00485321	0.00809115	0.71	0.72	0.8	0.595	-1.992	0.05	0.1974	0.43	13.4944	50.54
L15P	0.0019728	0.0019728	0.000810771	0.000806803	0.000258371	0.29	0.29	0.11	1	-6.933	0	0.1974	2.8	13.4944	50.54
L15R	0.000311427	0.000311427	0.000357462	0	2.51024e-05	0.59	0	0.07	1	-5.917	0	0.1974	1.24	13.4944	50.54
L15V	0.000115509	0.000115509	0.000748441	0.000612508	0.000139679	1.435	0.93	0.54	1	-2.975	0	0.1974	1.51	13.4944	50.54
G16A	0.00058044	0.00058044	0	0.000245171	0	0	0.29	0	1	-6	0	0.02145	0.04	14.662	44.33
G16C	0.000549553	0.000549553	0	0	0	0	0	0	1	-9	0	0.02145	1.07	14.662	44.33
G16D	0.0034838	0.0034838	4.3491e-05	0.000141423	0	0.01	0.03	0	1	-7	0	0.02145	5.72	14.662	44.33
G16R	0.000163468	0.000163468	0	0	0	0	0	0	1	-8	0	0.02145	7.35	14.662	44.33
G16S	0.00125995	0.00125995	3.26946e-05	8.10126e-05	5.56228e-05	0.02	0.06	0.04	1	-6	0	0.02145	1.15	14.662	44.33
G16V	0.000835257	0.000835257	0	0	0	0	0	0	1	-9	0	0.02145	1.21	14.662	44.33
F17C	7.96402e-05	7.96402e-05	0	0	0	0	0	0	1	-8	0	0.227	3.91	14.3007	51.01
F17I	0.00187076	0.00187076	0	0	8.43297e-05	0	0	0.04	1	-6	0.01	0.227	1.61	14.3007	51.01
F17L	0.00341518	0.00341518	0.00185048	0.00175777	0.00206998	0.36	0.33	0.37	0.632	-6	0.16	0.227	1.08	14.3007	51.01
F17S	0.00221988	0.00221988	0.00113879	0.00120083	0.000555397	0.34	0.35	0.2	1	-8	0	0.227	4.67	14.3007	51.01
F17V	0.000891717	0.000891717	5.98209e-05	0	3.19452e-05	0.06	0	0.03	0.674	-7	0.06	0.227	2.78	14.3007	51.01
F17Y	0.000793053	0.000793053	0	0	0	0	0	0	1	-3	0	0.227	1.01	14.3007	51.01
Q18E	2.09761e-06	2.09761e-06	5.5677e-05	0.000226856	6.62295e-05	2.5	1.73	1.06	0.249	1.422	1	0.6575	-0.19	17.0729	41.55
Q18H	0.00262346	0.00262346	0.00395031	0.00750007	0.0259587	0.69	0.77	0.93	0.334	-0.983	0.09	0.6575	-0.08	17.0729	41.55
Q18K	0.00173066	0.00173066	0.00156947	0.00186323	0.00667508	0.51	0.52	0.79	0.281	-0.537	0.15	0.6575	-1.57	17.0729	41.55
Q18L	0.0015495	0.0015495	0.00195938	0.00506159	0.00834173	0.62	0.8	0.85	1	-4.02	0.02	0.6575	-1.18	17.0729	41.55
Q18P	0.000266288	0.000266288	0	0	0	0	0	0	1	-2.824	0.01	0.6575	0.25	17.0729	41.55
Q18R	0.00264401	0.00264401	0.00460279	0.0227799	0.0343336	0.75	1.05	0.96	0.468	-0.978	0.18	0.6575	-1.34	17.0729	41.55
K19E	0.00183818	0.00183818	0.00436058	0.00360811	0.0101983	0.88	0.67	0.85	0.485	-2.426	0.2	0.9958	1.49	19.1304	38.02
K19I	0.00203053	0.00203053	0.00488832	0.00807708	0.011423	0.89	0.85	0.85	0.688	-6.479	0.1	0.9958	0.17	19.1304	38.02
K19N	0.00242611	0.00242611	0.00479601	0.00499896	0.0156551	0.8	0.69	0.87	0.355	-3.162	0.25	0.9958	0.84	19.1304	38.02
K19Q	0.001054	0.001054	0.00154904	0.00160844	0.00101344	0.68	0.61	0.49	0.287	-1.655	0.52	0.9958	0.79	19.1304	38.02
K19R	0.00229686	0.00229686	0.00513358	0.00682809	0.0146231	0.85	0.78	0.87	0.299	-1.669	0.59	0.9958	-0.46	19.1304	38.02
K19T	0.00122415	0.00122415	0.00216533	0.00245168	0.00708949	0.75	0.68	0.86	1	-4.443	0.14	0.9958	1	19.1304	38.02
A20E	0.00028665	0.00028665	0	0	6.69774e-05	0	0	0.18	1	-5	0	0.02053	2.39	20.5856	33.82
A20G	0.000154691	0.000154691	0.000227458	0	0	0.68	0	0	1	-4	0	0.02053	1.99	20.5856	33.82
A20P	0.000770499	0.000770499	0	0	0	0	0	0	1	-5	0	0.02053	-0.47	20.5856	33.82
A20S	0.00134232	0.00134232	0.000542464	1.42476e-05	0.00288008	0.29	0.01	0.68	1	-3	0	0.02053	1.56	20.5856	33.82
A20T	0.00373958	0.00373958	0.00299746	0.00243849	0.00241996	0.47	0.39	0.39	1	-4	0	0.02053	-0.73	20.5856	33.82
A20V	0.00252262	0.00252262	0.00413116	0.0060123	0.00586505	0.72	0.72	0.69	1	-4	0	0.02053	-1.25	20.5856	33.82
G21A	5.04049e-05	5.04049e-05	4.3102e-05	0	0	0.49	0	0	0.688	-6	0.02	0.07069	1.24	21.9162	29.69
G21E	0.00208617	0.00208617	0.00180423	0.000770234	0.00266193	0.49	0.26	0.56	1	-8	0	0.07069	1.75	21.9162	29.69
G21R	0.00255978	0.00255978	0.00126839	0.001222	0.000775779	0.34	0.32	0.23	1	-8	0	0.07069	1.85	21.9162	29.69
G21V	0.000583061	0.000583061	0	0	0	0	0	0	1	-9	0	0.07069	1.4	21.9162	29.69
F22C	0.000738878	0.000738878	0.000332729	0.000815103	0.000829846	0.31	0.52	0.52	1	-7.783	0	0.2098	3.85	19.1882	40.62
F22I	0.000805178	0.000805178	0	0	0	0	0	0	0.657	-5.856	0.02	0.2098	2.35	19.1882	40.62
F22L	0.00323324	0.00323324	0.00203601	0.0014067	0.00212271	0.4	0.3	0.39	0.729	-5.856	0.02	0.2098	1.76	19.1882	40.62
F22S	0.00200596	0.00200596	0.0010998	0.000934561	0.00100497	0.36	0.31	0.33	1	-7.783	0	0.2098	4.72	19.1882	40.62
F22V	0.000282139	0.000282139	0	0	0	0	0	0	1	-6.783	0	0.2098	2.52	19.1882	40.62
F22Y	0.00137242	0.00137242	0.00253943	0.00349152	0.00302818	0.77	0.74	0.68	0.287	-2.494	0.1	0.2098	0.75	19.1882	40.62
R23C	0.00099956	0.00099956	0.00325168	0.00499729	0.00981707	1.04	0.91	0.93	1	-3.338	0.01	0.9637	1.15	19.168	28.76
R23G	2.5014e-05	2.5014e-05	6.08955e-05	0	0	0.89	0	0	0.509	-1.458	0.13	0.9637	1.87	19.168	28.76
R23H	0.00543194	0.00543194	0.00955889	0.0163917	0.0541421	0.75	0.78	0.93	0.414	-0.136	0.28	0.9637	1.32	19.168	28.76
R23L	0.00100678	0.00100678	0.00118771	0.00207767	0.00597521	0.6	0.69	0.86	1	-3.052	0.07	0.9637	0.55	19.168	28.76
R23P	0.000985123	0.000985123	0.00202446	0.00190458	0.00615338	0.82	0.67	0.87	1	-1.668	0.07	0.9637	2.71	19.168	28.76
R23S	0.00100678	0.00100678	0.00128068	0.00301821	0.00400862	0.62	0.78	0.8	0.464	0.033	0.21	0.9637	1.5	19.168	28.76
I24F	0.00199003	0.00199003	2.06007e-05	0	9.23548e-05	0.01	0	0.04	1	-3.525	0	0.5615	1.62	14.7793	48.2
I24L	2.42687e-05	2.42687e-05	4.22031e-05	0	0	0.75	0	0	0.523	-1.683	0.05	0.5615	-0.51	14.7793	48.2
I24M	3.83601e-05	3.83601e-05	0	0	0	0	0	0	1	-2.079	0.01	0.5615	0.72	14.7793	48.2
I24N	0.00217322	0.00217322	0	0	0	0	0	0	1	-5.287	0	0.5615	0.74	14.7793	48.2
I24S	0.000707704	0.000707704	0	0	0	0	0	0	1	-4.287	0	0.5615	1.41	14.7793	48.2
I24T	0.00214503	0.00214503	0.00383702	0.00156286	0.00306683	0.76	0.42	0.58	0.334	-2.366	0.57	0.5615	0.94	14.7793	48.2
I24V	0.00157433	0.00157433	0.00284036	0.00391591	0.0223638	0.76	0.73	0.97	0.263	0.209	1	0.5615	0.73	14.7793	48.2
I25F	0.00136061	0.00136061	0.000789171	0.000877328	0.00223503	0.38	0.39	0.62	1	-3.303	0.01	0.7233	0.74	18.2347	30.86
I25L	0	0.000316926	0.000114196	0.000199342	0	0.26	0.38	0	0.26	-1.262	0.1	0.7233	0.34	18.2347	30.86
I25M	1.84162e-05	1.84162e-05	6.33953e-06	0	0.00457742	0.25	0	1.26	1	-1.755	0.01	0.7233	-0.7	18.2347	30.86
I25N	0.00192792	0.00192792	0.00326988	0.00212154	0.0104404	0.74	0.52	0.85	0.525	-5.181	0.03	0.7233	1.81	18.2347	30.86
I25S	0.000295156	0.000295156	0.000256846	0.000329724	2.92477e-05	0.49	0.53	0.09	1	-4.088	0.01	0.7233	2.18	18.2347	30.86
I25T	0.00129142	0.00129142	0.00229031	0.00520974	0.00696404	0.75	0.86	0.85	0.463	-2.637	0.13	0.7233	1.14	18.2347	30.86
I25V	0.00121532	0.00121532	0.00320377	0.00397297	0.00911006	0.93	0.8	0.89	0.263	0.117	0.68	0.7233	0.65	18.2347	30.86
A26D	0.000837736	0.000837736	0	0	0	0	0	0	1	-2.113	0.05	0.766	3.68	14.7172	36.01
A26G	0.000354098	0.000354098	0.000434615	0	0.00424353	0.61	0	0.95	1	-1.141	0.07	0.766	2.31	14.7172	36.01
A26P	0.000306416	0.000306416	0	0	0	0	0	0	1	-1.847	0.05	0.766	2.19	14.7172	36.01
A26S	0.000612947	0.000612947	0.00120275	0.00134388	0.000491089	0.8	0.7	0.44	1	-0.781	0.09	0.766	0.49	14.7172	36.01
A26T	0.00282678	0.00282678	0.00547806	0.0151854	0.0416325	0.79	0.93	0.98	0.263	0.018	0.14	0.766	-0.77	14.7172	36.01
A26V	0.00247257	0.00247257	0.00575011	0.0162983	0.0876899	0.87	0.98	1.07	0.287	0.346	0.39	0.766	-0.23	14.7172	36.01
A27E	8.89391e-05	8.89391e-05	0	0	0	0	0	0	1	-5	0	0.1041	8.04	12.3904	41.51
A27G	0.000102345	0.000102345	0.000257464	0.000388953	0	0.91	0.84	0	1	-4	0	0.1041	0.95	12.3904	41.51
A27P	0.000363762	0.000363762	0	0	0	0	0	0	1	-5	0	0.1041	1.01	12.3904	41.51
A27S	0.00105417	0.00105417	0.00121471	0.00174591	0.00137036	0.59	0.63	0.56	0.632	-3	0.08	0.1041	0.67	12.3904	41.51
A27T	0.00378899	0.00378899	0.000801649	0.000657044	0.00159241	0.17	0.14	0.29	0.724	-4	0.1	0.1041	-0.3	12.3904	41.51
A27V	0.00126867	0.00126867	4.11008e-05	0.000133235	0.000621431	0.03	0.09	0.32	0.681	-4	0.02	0.1041	-2.72	12.3904	41.51
N28D	0.0017776	0.0017776	0.00057653	0.00073054	0.00013752	0.24	0.29	0.07	0.509	-5	0.02	0.03272	-0.27	8.8955	42.37
N28H	0.000573481	0.000573481	0	0	0	0	0	0	1	-5	0	0.03272	-0.01	8.8955	42.37
N28I	0.000738882	0.000738882	0.00207055	0.000374202	0.00207309	0.96	0.33	0.73	1	-9	0	0.03272	-4.25	8.8955	42.37
N28K	0.000862474	0.000862474	0	0	0	0	0	0	1	-6	0	0.03272	-0.39	8.8955	42.37
N28S	0.00121524	0.00121524	0.00189593	0.00127149	0.00636056	0.7	0.51	0.84	0.478	-5	0.01	0.03272	-1.45	8.8955	42.37
N28T	0.000401465	0.000401465	0.00039867	1.09059e-05	0	0.54	0.02	0	1	-6	0	0.03272	-1.65	8.8955	42.37
N28Y	0.00122185	0.00122185	0.00139792	0.0042424	0.00397763	0.59	0.82	0.76	1	-8	0	0.03272	-2.38	8.8955	42.37
E29A	7.71145e-05	7.71145e-05	0	0	0	0	0	0	1	-6	0.01	0.09847	-0.21	6.3862	40.56
E29D	0.00258787	0.00258787	0.00430178	0.0102108	0.0188746	0.73	0.85	0.89	0.464	-3	0.61	0.09847	0.22	6.3862	40.56
E29G	0.00220655	0.00220655	0.000854561	0.000947015	0.000294313	0.28	0.3	0.11	1	-7	0	0.09847	1.64	6.3862	40.56
E29K	0.00137329	0.00137329	7.55015e-05	2.64018e-05	0	0.05	0.01	0	1	-4	0.01	0.09847	-0.87	6.3862	40.56
E29Q	0.000374706	0.000374706	0	0	0	0	0	0	1	-3	0.01	0.09847	-0.91	6.3862	40.56
E29V	0.000936823	0.000936823	4.08066e-05	5.76848e-05	0	0.04	0.05	0	1	-7	0	0.09847	-2.67	6.3862	40.56
Y30C	0.0012614	0.0012614	0.00259777	0.00510013	0.0111605	0.82	0.86	0.92	0.485	-7.416	0.07	0.9124	1.61	7.3184	42.7
Y30D	0	0.000332887	0	0.00218856	0	0	0.98	0	1	-8.455	0.05	0.9124	2.46	7.3184	42.7
Y30F	0.00198248	0.00198248	0.00178185	0.00516452	0.0104168	0.5	0.75	0.84	0.281	-2.193	0.6	0.9124	-0.21	7.3184	42.7
Y30H	0.00132756	0.00132756	0.0026412	0.00526111	0.00303369	0.8	0.85	0.69	0.299	-4.377	0.15	0.9124	0.71	7.3184	42.7
Y30N	0.00113571	0.00113571	0.00295765	0.00156301	0.0166112	0.93	0.58	0.98	0.464	-7.708	0.28	0.9124	1.59	7.3184	42.7
Y30S	3.09362e-05	3.09362e-05	2.59133e-05	0	0.000329998	0.48	0	0.94	1	-7.463	0.1	0.9124	0.55	7.3184	42.7
D31A	0.000109076	0.000109076	0	0	0	0	0	0	1	-8	0.1	0.1502	2.97	8.2875	31.66
D31E	0.00149807	0.00149807	0.00134452	0.000988073	0.00434401	0.5	0.39	0.74	0.657	-4	0.25	0.1502	2.44	8.2875	31.66
D31G	0.00145913	0.00145913	0.000964357	0.00100207	0.000515054	0.41	0.4	0.26	1	-7	0.18	0.1502	3.87	8.2875	31.66
D31H	0.000290814	0.000290814	0.000191963	0.000124802	0	0.41	0.3	0	1	-7	0.08	0.1502	3.16	8.2875	31.66
D31N	0.00122547	0.00122547	0.00175184	0.00258396	0.00149701	0.67	0.69	0.54	0.48	-5	0.35	0.1502	1.89	8.2875	31.66
D31V	0.00166034	0.00166034	0	0	1.49827e-05	0	0	0.0075	1	-9	0.04	0.1502	2.67	8.2875	31.66
D31Y	0.000485533	0.000485533	0.00017386	0	0	0.26	0	0	1	-9	0.07	0.1502	2.03	8.2875	31.66
K32E	0.00125374	0.00125374	0.00202666	0.00342993	0.0127715	0.72	0.76	0.93	0.509	-3.359	0.17	0.5383	0.53	11.6046	25.11
K32I	0.0017975	0.0017975	0.00153205	0.00449695	0.00752731	0.49	0.74	0.81	1	-6.989	0.01	0.5383	0.13	11.6046	25.11
K32N	0.00160123	0.00160123	0.00172377	0.00189485	0.00596196	0.56	0.54	0.79	0.517	-4.193	0.05	0.5383	0.43	11.6046	25.11
K32Q	0	0.000313685	0	0	0.00112131	0	0	0.78	1	-3.326	0.04	0.5383	-0.43	11.6046	25.11
K32R	0.00173276	0.00173276	0.00334257	0.00160831	0.0048503	0.79	0.48	0.73	0.482	-2.488	0.06	0.5383	-0.29	11.6046	25.11
K32T	0.00084593	0.00084593	0.00097638	0.000118322	0.00164609	0.59	0.12	0.66	0.724	-4.948	0.05	0.5383	0.77	11.6046	25.11
S33A	0.000198828	0.000198828	0.000897796	0.000957211	0.000169921	1.215	0.9	0.46	0.509	-1.529	0.68	0.684	2.53	10.9807	33.98
S33L	0.000995393	0.000995393	0.0018609	0.00173658	0.00341624	0.78	0.64	0.77	1	-3.157	0.26	0.684	1.88	10.9807	33.98
S33P	0.00095006	0.00095006	0.00116984	0.00065552	0.000655922	0.61	0.4	0.4	1	-2.141	0.24	0.684	3.79	10.9807	33.98
S33T	0.00226472	0.00226472	0.00284903	0.00387859	0.0214149	0.62	0.64	0.93	0.249	0.787	0.63	0.684	0.71	10.9807	33.98
I34K	0.00159285	0.00159285	9.66214e-05	0	9.22563e-05	0.05	0	0.05	1	-7	0.01	0.09591	0.42	6.8586	44.28
I34L	0.00330638	0.00330638	0.00247536	0.00183204	0.00453073	0.45	0.35	0.57	1	-2	0.03	0.09591	-0.06	6.8586	44.28
I34M	0.00173893	0.00173893	0.00282066	0.00167163	0.00759061	0.72	0.49	0.81	1	-3	0.01	0.09591	0.93	6.8586	44.28
I34R	0	0.000333023	0	0	0	0	0	0	1	-7	0	0.09591	0.12	6.8586	44.28
I34T	0.000983129	0.000983129	0.00155456	0.00144396	0.00286356	0.71	0.6	0.74	1	-5	0.03	0.09591	0.14	6.8586	44.28
I34V	0.00214542	0.00214542	0.00397806	0.00231844	0.00809562	0.77	0.52	0.79	0.464	-1	0.18	0.09591	-0.01	6.8586	44.28
W35C	0.000776385	0.000776385	0.000519445	0	0.000395267	0.41	0	0.33	0.334	-10.862	0.32	0.594	1.88	11.4932	32.97
W35G	0.000116769	0.000116769	0	0	0	0	0	0	1	-11.703	0.3	0.594	3.01	11.4932	32.97
W35L	0.000684865	0.000684865	0.00017571	0.000531442	0.000695051	0.2	0.43	0.5	0.674	-11.518	0.62	0.594	-0.28	11.4932	32.97
W35R	0.00345275	0.00345275	0.000982308	0.000808306	0.00151529	0.22	0.18	0.3	0.681	-12.556	0.33	0.594	0.6	11.4932	32.97
W35S	0.000179891	0.000179891	0	0	0	0	0	0	0.595	-12.354	0.39	0.594	1.33	11.4932	32.97
K36E	0.00212265	0.00212265	0.00389905	0.00678263	0.0192814	0.77	0.8	0.92	0.26	1.736	1	0.9396	0.41	14.657	29.34
K36I	0.00123715	0.00123715	0.00193256	0.00154892	0.0049981	0.7	0.56	0.8	1	-2.996	0.02	0.9396	0.46	14.657	29.34
K36N	0.00139904	0.00139904	0.0020037	0.00539156	0.00408311	0.67	0.85	0.74	0.493	-0.792	0.07	0.9396	1.35	14.657	29.34
K36Q	0.000123942	0.000123942	7.77034e-05	0.000600703	8.37731e-05	0.4	0.9	0.4	0.32	0.379	0.26	0.9396	0.23	14.657	29.34
K36R	0.00219855	0.00219855	0.00285179	0.00768317	0.0176468	0.63	0.82	0.9	1	-0.931	0.05	0.9396	-0.15	14.657	29.34
K36T	0.000282068	0.000282068	0.00125628	0.000653676	0.00552513	1.21	0.72	1.01	1	-1.045	0.06	0.9396	0.96	14.657	29.34
T37A	0.00133778	0.00133778	0.000974769	0.00114986	0.000505781	0.44	0.46	0.27	1	-5	0	0.08641	2.19	12.7441	41.8
T37I	0.00107306	0.00107306	5.73163e-05	0.000139307	0	0.05	0.11	0	1	-6	0	0.08641	1.65	12.7441	41.8
T37K	0.000402002	0.000402002	0	0	0	0	0	0	1	-6	0	0.08641	2.4	12.7441	41.8
T37P	0.000599008	0.000599008	0.000106466	4.93624e-05	0	0.15	0.07	0	1	-6	0	0.08641	0.48	12.7441	41.8
T37R	0.000174213	0.000174213	0	0	0	0	0	0	1	-6	0	0.08641	7.26	12.7441	41.8
T37S	0.00112231	0.00112231	0.000555362	0.000239834	0.00424259	0.33	0.17	0.79	0.595	-4	0.08	0.08641	2.65	12.7441	41.8
Y38C	0.00131075	0.00131075	0.000397278	0.000542039	0.000531127	0.23	0.29	0.28	1	-7.937	0	0.38	4.63	10.7695	48.76
Y38D	6.07443e-05	6.07443e-05	0	0	0	0	0	0	1	-8.937	0	0.38	6.3	10.7695	48.76
Y38F	0.000463391	0.000463391	0.00131245	0.00348598	0.00318542	0.97	1.01	0.88	0.335	-2.14	0.27	0.38	0.63	10.7695	48.76
Y38H	0.00110642	0.00110642	0.000790436	0.000604788	0.00109507	0.43	0.35	0.49	0.634	-4.734	0.05	0.38	2.85	10.7695	48.76
Y38N	0.000505459	0.000505459	0	0	0	0	0	0	1	-8.203	0	0.38	4.09	10.7695	48.76
Y38S	0	0.00031701	0	0	0	0	0	0	1	-7.937	0	0.38	6.06	10.7695	48.76
E39A	0.000204385	0.000204385	0.000298435	0.00107706	9.20722e-05	0.68	0.92	0.31	0.681	-4.837	0.07	0.6232	0.1	14.6336	30.18
E39D	0.00312195	0.00312195	0.00322655	0.0018328	0.00495922	0.55	0.37	0.61	1	-2.708	0.03	0.6232	1.13	14.6336	30.18
E39G	0.00191513	0.00191513	0.00249547	0.00208644	0.00375743	0.63	0.52	0.66	1	-5.837	0.02	0.6232	1.05	14.6336	30.18
E39K	0.000966717	0.000966717	0.000852765	0.00025403	0.000618052	0.5	0.2	0.38	0.349	-2.201	0.59	0.6232	-0.47	14.6336	30.18
E39Q	7.23275e-05	7.23275e-05	0.000203794	0.000134975	0.000799567	0.96	0.66	0.94	0.42	-1.818	0.33	0.6232	-0.59	14.6336	30.18
E39V	0.00130286	0.00130286	0.00195128	0.0014187	0.00330913	0.69	0.52	0.71	1	-5.91	0.02	0.6232	0.25	14.6336	30.18
S40C	0.00172247	0.00172247	0.00257136	0.0152455	0.0153441	0.68	1.05	0.92	1	-2.078	0.19	1.709	0.1	16.9843	29.67
S40G	0.00215365	0.00215365	0.00497738	0.00328555	0.00703269	0.87	0.61	0.76	1	-1.618	0.46	1.709	2.03	16.9843	29.67
S40I	0.00119412	0.00119412	0.000767019	0.00173258	0.0074649	0.4	0.59	0.87	0.334	-1.664	0.46	1.709	0.79	16.9843	29.67
S40N	0.00226296	0.00226296	0.00403202	0.00558374	0.0176206	0.76	0.73	0.9	0.32	0.125	0.48	1.709	1.86	16.9843	29.67
S40R	0.00169973	0.00169973	0.00276288	0.00102347	0.00275759	0.72	0.37	0.61	0.464	1.069	0.54	1.709	-0.43	16.9843	29.67
S40T	0.000665768	0.000665768	0.00156895	0.00260608	0.00175541	0.88	0.85	0.72	0.684	-0.643	0.59	1.709	-0.17	16.9843	29.67
N41D	0.000849121	0.000849121	0.000302065	0.000473258	0.000130288	0.26	0.35	0.13	1	-5	0.02	0.0537	2.27	15.1429	38.6
N41H	4.95899e-05	4.95899e-05	0	0	0	0	0	0	1	-4.92	0	0.0537	3.24	15.1429	38.6
N41I	0.00162496	0.00162496	0	0	0	0	0	0	1	-7.992	0	0.0537	2.02	15.1429	38.6
N41K	0.00167455	0.00167455	0	0	5.60534e-05	0	0	0.03	1	-5.933	0.01	0.0537	1.3	15.1429	38.6
N41S	0.00200992	0.00200992	0.00113056	0.00114228	0.00113682	0.37	0.36	0.36	1	-5	0.01	0.0537	2.65	15.1429	38.6
N41T	0.000351635	0.000351635	0	0	0	0	0	0	1	-6	0.01	0.0537	1.38	15.1429	38.6
N41Y	0.000227263	0.000227263	0.000854397	0.00821905	0.0208439	1.105	1.42	1.16	0.595	-6.44	0.02	0.0537	1.61	15.1429	38.6
H42D	0.000144568	0.000144568	0	0	0	0	0	0	1	-6.517	0.02	0.2115	2.38	13.0363	40.78
H42L	0.0014193	0.0014193	0.00118531	0.00152092	0.00148012	0.48	0.51	0.51	1	-7.117	0.07	0.2115	-0.52	13.0363	40.78
H42N	0.000530497	0.000530497	9.76502e-05	0.00560425	0.00107664	0.15	1.1	0.67	1	-5.342	0.04	0.2115	-0.3	13.0363	40.78
H42P	0	0.000314229	0	0	0	0	0	0	1	-3.613	0.02	0.2115	1.96	13.0363	40.78
H42Q	0.00194395	0.00194395	0.00113481	0.00322999	0.00266974	0.38	0.63	0.57	1	-5.6	0.03	0.2115	-0.4	13.0363	40.78
H42R	0.00156549	0.00156549	0.00044816	0.000612968	0.00025352	0.22	0.28	0.13	1	-5.942	0.04	0.2115	-2.42	13.0363	40.78
H42Y	0.00114447	0.00114447	0.000534884	0.00313289	0.000458723	0.32	0.76	0.28	0.287	-3	0.12	0.2115	-2.19	13.0363	40.78
S43A	0.000237002	0.000237002	1.90097e-05	0.0053092	0.0110318	0.07	1.29	1.1	0.635	-1.005	0.3	1.32	-0.01	18.4531	26.9
S43L	0.00117791	0.00117791	0.0029316	0.0053512	0.0087821	0.9	0.89	0.89	1	-1.952	0.1	1.32	-0.3	18.4531	26.9
S43P	0.00176093	0.00176093	0.00400277	0.00457658	0.016509	0.86	0.74	0.92	0.691	2.357	0.14	1.32	-0.49	18.4531	26.9
S43T	0.000866198	0.000866198	0.00210045	0.0035173	0.0160248	0.89	0.86	0.999999	0.249	-0.433	0.21	1.32	-0.02	18.4531	26.9
A44D	0.0013098	0.0013098	0	0	0.000224874	0	0	0.14	0.674	-0.415	0.03	0.3731	1.89	16.2469	32.08
A44G	0.000516478	0.000516478	0.000816535	5.28132e-06	0.00470745	0.71	0.01	0.92	0.291	-1.347	0.02	0.3731	1.35	16.2469	32.08
A44P	0.000602708	0.000602708	0.00108066	0.000150186	0.00208866	0.76	0.19	0.77	1	-1.529	0.01	0.3731	-1.85	16.2469	32.08
A44S	0.00101086	0.00101086	0.00171808	0.000880247	0.00385035	0.74	0.46	0.79	0.359	0.3	0.05	0.3731	-0.45	16.2469	32.08
A44T	0.00329309	0.00329309	0.00615891	0.0133676	0.0246084	0.78	0.86	0.89	0.263	2.198	1	0.3731	-1.82	16.2469	32.08
A44V	0.00266074	0.00266074	0.00528906	0.00452369	0.00873893	0.8	0.64	0.76	0.299	-0.374	0.08	0.3731	-1.84	16.2469	32.08
K45E	0.00138874	0.00138874	0.00225337	0.00476047	0.049486	0.72	0.82	1.07	0.463	-0.518	0.35	1.903	1.31	15.5686	32.58
K45I	0.00133031	0.00133031	0.00119972	0.00412683	0.00713707	0.5	0.79	0.85	0.42	-2.059	0.41	1.903	1.87	15.5686	32.58
K45N	0.00188353	0.00188353	0.00330565	0.0122887	0.0196876	0.75	0.98	0.94	0.263	-0.449	0.34	1.903	1.36	15.5686	32.58
K45Q	5.65777e-05	5.65777e-05	0.000408589	0	0	1.505	0	0	0.37	-0.482	0.34	1.903	1.26	15.5686	32.58
K45R	0.00127189	0.00127189	0.00226416	0.00679339	0.00538254	0.76	0.93	0.81	0.287	-0.468	0.39	1.903	-0.18	15.5686	32.58
K45T	0.000231863	0.000231863	0.000311496	0.000518615	5.01114e-05	0.64	0.71	0.17	0.427	0.645	0.43	1.903	1.36	15.5686	32.58
L46F	0.000596001	0.000596001	0.000104335	0	0.000577056	0.14	0	0.49	0.595	-2.989	0.05	0.3671	0.85	12.0597	34.56
L46M	0.00187881	0.00187881	0.00287378	0.00179592	0.0109473	0.69	0.49	0.86	1	-1.694	0.01	0.3671	-0.31	12.0597	34.56
L46S	0.00215474	0.00215474	0.00076155	0.000818471	0.00025558	0.26	0.27	0.1	1	-4.622	0	0.3671	3.39	12.0597	34.56
L46V	0.00026351	0.00026351	5.86461e-05	0	0.000349718	0.18	0	0.57	0.634	-2.078	0.2	0.3671	1.28	12.0597	34.56
L46W	0.000211774	0.000211774	0	0	0	0	0	0	1	-5.111	0	0.3671	2.74	12.0597	34.56
I47F	0.00260856	0.00260856	0.00417843	0.00535802	0.01379	0.71	0.68	0.84	1	-1.956	0.71	0.4387	2.14	12.9138	32.49
I47L	2.46073e-05	2.46073e-05	0.000210967	0.000194138	0.00397118	1.625	1.02	1.22	0.249	-0.478	0.79	0.4387	0.94	12.9138	32.49
I47M	0.000401192	0.000401192	0.000676287	0.000368481	0.000172401	0.73	0.48	0.3	0.681	-1.117	0.27	0.4387	1.76	12.9138	32.49
I47N	0.00299093	0.00299093	0.00487667	0.00492192	0.00600756	0.72	0.63	0.66	0.463	-1.3	0.53	0.4387	2.41	12.9138	32.49
I47S	0.000152067	0.000152067	0	0	0	0	0	0	0.729	-1.433	0.73	0.4387	2.31	12.9138	32.49
I47T	0.0024753	0.0024753	0.0024536	0.0020372	0.00175042	0.54	0.45	0.41	1	-1.433	0.65	0.4387	2.98	12.9138	32.49
I47V	0.00151936	0.00151936	0.00309735	0.00139379	0.00336335	0.81	0.47	0.68	0.484	-0.639	0.63	0.4387	1.12	12.9138	32.49
K48E	0.0026794	0.0026794	0.00186517	0.00175138	0.00317725	0.43	0.39	0.54	0.334	-1.371	0.61	0.7915	1	14.076	30.76
K48I	0.00146761	0.00146761	0.00168777	0.00110189	0.000774988	0.59	0.42	0.34	0.484	-5.769	0.08	0.7915	0	14.076	30.76
K48N	0.00256281	0.00256281	0.000428526	7.83443e-05	0.00212433	0.14	0.02	0.45	0.674	-2.714	0.13	0.7915	0.97	14.076	30.76
K48Q	0.000604576	0.000604576	0.000297532	0.000596285	0.000596248	0.33	0.49	0.49	0.46	-1.705	0.27	0.7915	0.38	14.076	30.76
K48R	0.00216513	0.00216513	0.00378761	0.00350251	0.00541876	0.75	0.62	0.71	0.32	-0.906	0.41	0.7915	0.3	14.076	30.76
K48T	0.000622309	0.000622309	0.0010904	0.00176782	0.000853634	0.75	0.77	0.57	0.435	-3.536	0.21	0.7915	1.17	14.076	30.76
G49A	0.000137288	0.000137288	0.000470576	0	0.000310925	1.06	0	0.69	0.509	-1.387	0.61	0.5117	1.33	11.9935	29.92
G49C	0.00184443	0.00184443	0.00166702	0.00564281	0.0110814	0.51	0.79	0.86	1	-3.682	0.04	0.5117	1.09	11.9935	29.92
G49D	0.00185624	0.00185624	0.00425872	0.00996573	0.0301397	0.87	0.93	0.99	0.287	-1.897	0.52	0.5117	0.39	11.9935	29.92
G49R	5.45887e-05	5.45887e-05	1.37983e-05	0.000842341	0.00281504	0.2	1.198	1.105	0.358	1.251	0.87	0.5117	0.51	11.9935	29.92
G49S	0.00125963	0.00125963	0.00171672	0.00239067	0.00403421	0.65	0.66	0.76	0.637	-1.149	0.66	0.5117	1.96	11.9935	29.92
G49V	0.000414919	0.000414919	0	0	0.00111196	0	0	0.72	1	-3.515	0.22	0.5117	1.05	11.9935	29.92
D50A	2.23566e-05	2.23566e-05	0	0	0	0	0	0	1	-4.833	0	0.1234	3.37	12.2184	33.49
D50E	0.000940991	0.000940991	0.000743471	1.00638e-05	0.00451074	0.46	0.01	0.83	1	-2.567	0	0.1234	1.85	12.2184	33.49
D50G	0.00183834	0.00183834	0.000863985	0.000575629	0.00130744	0.32	0.23	0.41	1	-4.467	0.01	0.1234	3.62	12.2184	33.49
D50H	0.000326974	0.000326974	0.000237313	0.000126276	0	0.44	0.27	0	1	-4.767	0	0.1234	3.02	12.2184	33.49
D50N	0.00199651	0.00199651	0.00350152	0.0045617	0.0080784	0.75	0.71	0.8	0.451	-2.667	0.07	0.1234	1.65	12.2184	33.49
D50V	0.0023187	0.0023187	0	0	0	0	0	0	1	-6.5	0	0.1234	2.87	12.2184	33.49
D50Y	0.000807332	0.000807332	3.17155e-06	0	0	0.002	0	0	1	-6.467	0	0.1234	2.14	12.2184	33.49
I51K	0.000514922	0.000514922	0	0	0	0	0	0	1	-6.982	0	0.06404	0.56	11.0878	43.21
I51L	0.0024249	0.0024249	0.00313301	0.0085672	0.012394	0.63	0.82	0.84	0.464	-2	0.02	0.06404	-0.52	11.0878	43.21
I51M	0.00137071	0.00137071	0.000474987	0.000716744	0.00011312	0.26	0.34	0.07	1	-2.991	0	0.06404	0.02	11.0878	43.21
I51R	1.0828e-05	1.0828e-05	0	0	0	0	0	0	1	-6.941	0	0.06404	0.21	11.0878	43.21
I51T	0.00185722	0.00185722	0.000534055	0.000535074	0.00029491	0.22	0.22	0.13	1	-4.982	0	0.06404	1.25	11.0878	43.21
I51V	0.00139416	0.00139416	0.00313648	0.00385925	0.0053985	0.86	0.76	0.79	0.365	-0.982	0.06	0.06404	1.1	11.0878	43.21
S52A	0.00019314	0.00019314	0	0.00172522	0.0214512	0	1.06	1.18	0.26	-0.069	0.29	0.4644	1.34	13.6373	25.62
S52C	0.000112889	0.000112889	0	0.00066484	0.000425219	0	0.95	0.79	0.263	-1.172	0.11	0.4644	1.61	13.6373	25.62
S52F	0.000852351	0.000852351	0.000852307	0.00126202	0.00566791	0.54	0.6	0.88	0.288	-2.061	0.11	0.4644	1.36	13.6373	25.62
S52P	0.00188416	0.00188416	0.00111605	0.000994054	0.000457753	0.38	0.34	0.19	1	-1.45	0.09	0.4644	0.55	13.6373	25.62
S52T	0.00169499	0.00169499	0.00274709	0.00495228	0.0300054	0.72	0.77	0.999999	0.287	0.742	0.34	0.4644	0.37	13.6373	25.62
S52Y	0.0016606	0.0016606	0.000869658	0.000936633	0.0010945	0.35	0.36	0.39	1	-1.561	0.14	0.4644	1.48	13.6373	25.62
K53E	0.00101603	0.00101603	0.00156008	0.00260573	0.00471598	0.7	0.74	0.82	0.303	0.302	0.57	1.42	1.21	16.077	24.19
K53I	0.000875046	0.000875046	0.00152347	0.00176788	0.00252082	0.75	0.68	0.74	1	-4.282	0.07	1.42	1.15	16.077	24.19
K53N	0.00129189	0.00129189	0.00168129	0.0025365	0.0024707	0.63	0.67	0.65	0.281	-0.072	0.38	1.42	1.04	16.077	24.19
K53Q	0.000123122	0.000123122	0.000483672	0	0	1.14	0	0	0.359	-0.727	0.26	1.42	0.33	16.077	24.19
K53R	0.00142137	0.00142137	0.000970618	0.00370493	0.00904209	0.42	0.75	0.87	0.689	-1.298	0.2	1.42	-0.3	16.077	24.19
K53T	0.00044034	0.00044034	0.000370173	0.00022286	0	0.48	0.33	0	0.263	-2.107	0.33	1.42	0.71	16.077	24.19
I54F	0.00354901	0.00354901	0.00241412	0.00393102	0.00245943	0.42	0.52	0.4	0.33	-3.533	0.03	0.3351	0.96	15.5865	33.4
I54L	0.000252518	0.000252518	0.000747079	0.00487086	0.00710745	0.99	1.255	1.05	0.32	-1.667	0.27	0.3351	0.68	15.5865	33.4
I54M	0.000246642	0.000246642	0.000765318	0.0018671	0.000989724	1.01	1.01	0.8	1	-2.516	0	0.3351	1.03	15.5865	33.4
I54N	0.00114569	0.00114569	0	0	0	0	0	0	1	-6.536	0	0.3351	1.92	15.5865	33.4
I54S	0.000469934	0.000469934	0	0	0	0	0	0	1	-5.55	0	0.3351	2.98	15.5865	33.4
I54T	0.00192133	0.00192133	0.00418329	0.007549	0.00737901	0.84	0.85	0.79	1	-4.389	0	0.3351	2.11	15.5865	33.4
I54V	0.00098703	0.00098703	0.00168821	0.00628489	0.0161789	0.74	0.97	0.99	0.26	-0.633	0.42	0.3351	0.47	15.5865	33.4
S55A	8.15774e-05	8.15774e-05	0	8.80845e-05	0.00179041	0	0.52	1.02	0.249	-0.562	0.47	1.82	0.73	18.9186	27.38
S55C	0	0.000348115	0	0	0	0	0	0	1	-2.321	0.03	1.82	0.88	18.9186	27.38
S55F	0.000679313	0.000679313	0.000656436	0.000531954	0.00121928	0.53	0.43	0.64	1	-2.766	0.02	1.82	-0.45	18.9186	27.38
S55P	0.00133967	0.00133967	0.00282063	0.00790206	0.0205848	0.83	0.95	0.98	0.263	1.077	0.68	1.82	-0.06	18.9186	27.38
S55T	0.000559766	0.000559766	0.00027177	0.000479734	0.00116139	0.33	0.46	0.67	0.365	-0.404	0.39	1.82	1.1	18.9186	27.38
S55Y	0.00145922	0.00145922	0.00103391	0.00218061	0.00109655	0.43	0.6	0.42	1	-2.343	0.02	1.82	-0.16	18.9186	27.38
S56A	1.6146e-05	1.6146e-05	0	0.000271554	0.00360918	0	1.22	1.25	0.33	-1.643	0.51	0.6748	-0.59	19.8306	26.22
S56L	0.00112772	0.00112772	0.000895687	0.00139959	0.00176896	0.46	0.55	0.61	0.26	-4.028	0.21	0.6748	-1.13	19.8306	26.22
S56P	0.00202488	0.00202488	0.00445771	0.0137932	0.0132994	0.85	0.99	0.88	0.448	-3.317	0.21	0.6748	-2.56	19.8306	26.22
S56T	0.00127443	0.00127443	0.0020696	0.00153229	0.00137012	0.72	0.54	0.51	0.37	-1.837	0.28	0.6748	0.17	19.8306	26.22
D57A	0.0002536	0.0002536	0.000257266	0	0	0.54	0	0	0.291	-1.554	0.73	1.832	0.36	21.7923	20.29
D57E	0.00170536	0.00170536	0.0014939	0.00143602	0.0217821	0.5	0.45	0.96	0.309	-0.344	1	1.832	-0.55	21.7923	20.29
D57G	0.00167427	0.00167427	0.00273761	0.00394175	0.00774762	0.72	0.72	0.82	0.33	-1.963	0.28	1.832	1.01	21.7923	20.29
D57H	0.000516054	0.000516054	0.00120114	0.00131255	0.00140498	0.87	0.74	0.73	0.674	-1.974	0.1	1.832	1.01	21.7923	20.29
D57N	0.00199949	0.00199949	0.00389794	0.00472019	0.00677733	0.79	0.72	0.77	0.287	-0.382	0.4	1.832	1.01	21.7923	20.29
D57V	0.00116648	0.00116648	0.00345439	0.00341155	0.00326043	0.99	0.78	0.73	1	-3.089	0.19	1.832	0.72	21.7923	20.29
D57Y	0.00168568	0.00168568	0.00204922	0.00204611	0.00287017	0.61	0.55	0.63	1	-3.277	0.02	1.832	0.12	21.7923	20.29
E58A	0.00012608	0.00012608	0.000500327	0.0023523	3.5248e-05	1.14	1.245	0.21	0.32	-4.472	0.08	0.7067	0.46	19.0881	28.51
E58D	0.00156491	0.00156491	0.00403135	0.00755799	0.0199688	0.92	0.9	0.96	0.33	-0.719	1	0.7067	1.78	19.0881	28.51
E58G	0.00180056	0.00180056	0.00274149	0.0026937	0.00338194	0.69	0.6	0.65	1	-5.132	0.02	0.7067	2.29	19.0881	28.51
E58K	0.0012638	0.0012638	0.00401608	0.00492179	0.013493	1.02	0.85	0.94	0.263	-3.221	0.09	0.7067	0.06	19.0881	28.51
E58Q	0.000400298	0.000400298	0.000383489	0.000109845	0	0.52	0.21	0	1	-2.331	0.03	0.7067	0.3	19.0881	28.51
E58V	0.00121712	0.00121712	0.0012226	0.00169466	0.0060353	0.54	0.58	0.83	1	-5.244	0.02	0.7067	0.09	19.0881	28.51
F59C	0.00014465	0.00014465	0	0	0	0	0	0	1	-3.494	0	0.2607	5.18	14.4048	39.68
F59I	0.00087976	0.00087976	0.000588317	0.000377086	0.00540856	0.41	0.3	0.87	0.463	-0.01	1	0.2607	3.8	14.4048	39.68
F59L	0.00290141	0.00290141	0.00354159	0.00457611	0.0110386	0.61	0.62	0.79	0.287	-0.834	0.27	0.2607	2.47	14.4048	39.68
F59S	0.00233858	0.00233858	0.00131123	0.0012064	0.000440846	0.37	0.34	0.15	1	-4.041	0.01	0.2607	6.06	14.4048	39.68
F59V	0.000412481	0.000412481	0	0	0	0	0	0	0.42	-0.677	0.46	0.2607	3.98	14.4048	39.68
F59Y	0.00161487	0.00161487	6.54307e-06	0.000256587	0.000663503	0.002	0.13	0.29	1	-1.594	0.01	0.2607	0.65	14.4048	39.68
P60A	0	0.000348751	0	0	0	0	0	0	0.32	-7.09	0.04	0.1356	1.96	19.4219	29.59
P60H	0.00208826	0.00208826	0.000293716	2.08825e-05	0.00153639	0.12	0.0075	0.42	1	-7.947	0	0.1356	2.34	19.4219	29.59
P60L	0.00122855	0.00122855	7.41494e-06	2.08825e-05	4.57531e-05	0.005	0.01	0.03	0.394	-9.024	0.01	0.1356	1.93	19.4219	29.59
P60R	3.59399e-06	3.59399e-06	0	0	0	0	0	0	1	-7.934	0	0.1356	1.57	19.4219	29.59
P60S	0.00126788	0.00126788	0.0004229	7.02236e-05	0.00141889	0.25	0.05	0.52	0.365	-6.926	0.01	0.1356	1.51	19.4219	29.59
P60T	0.00157693	0.00157693	0	0	2.73218e-05	0	0	0.01	1	-7.154	0	0.1356	1.69	19.4219	29.59
K61E	0.00152915	0.00152915	0.00363981	0.00636902	0.0127943	0.88	0.86	0.91	0.249	1.895	0.43	1.219	-0.26	22.1599	25.53
K61M	0.00246396	0.00246396	0.00415691	0.00650225	0.0148659	0.73	0.75	0.86	0.355	-2.15	0.05	1.219	0.33	22.1599	25.53
K61N	0.00209445	0.00209445	0.00266291	0.011989	0.0295845	0.62	0.94	0.97	0.26	1.461	0.37	1.219	0.75	22.1599	25.53
K61Q	0.000164668	0.000164668	8.93811e-06	0	0.000357788	0.05	0	0.68	0.365	0.551	0.09	1.219	0.41	22.1599	25.53
K61R	0.00172656	0.00172656	0.00363609	0.00567404	0.0193766	0.83	0.8	0.95	0.359	-0.692	0.08	1.219	0.13	22.1599	25.53
K61T	0.000681428	0.000681428	0.00212571	0.00504749	0.00503813	1.01	1.01	0.89	0.435	-0.633	0.07	1.219	0.5	22.1599	25.53
C62F	0.000440383	0.000440383	0	0	4.66397e-05	0	0	0.09	1	-6.569	0.02	0.8002	3.05	19.1688	31.5
C62G	0.000717965	0.000717965	0.000381732	0	0.00510421	0.35	0	0.89	0.484	-6.984	0.05	0.8002	1.33	19.1688	31.5
C62R	0.00230828	0.00230828	0.00118966	0.0009846	0.000472515	0.35	0.29	0.16	1	-7.372	0.01	0.8002	7.1	19.1688	31.5
C62S	0.00204892	0.00204892	0.00231039	0.00221663	0.00535055	0.58	0.52	0.72	0.309	-5.434	0.11	0.8002	0.49	19.1688	31.5
C62W	0.00033629	0.00033629	0	0	0	0	0	0	1	-7.29	0	0.8002	5.11	19.1688	31.5
C62Y	0.0024702	0.0024702	0	3.49189e-05	0.000417175	0	0.01	0.14	1	-6.572	0.02	0.8002	3.2	19.1688	31.5
D63A	0.000348878	0.000348878	0.000167208	0	0.000263064	0.33	0	0.42	0.342	-5.35	0.09	0.5216	1.26	20.6951	30.13
D63E	0.00158758	0.00158758	0.00167716	0.00112995	0.00592195	0.56	0.41	0.79	0.26	-2.725	0.14	0.5216	0.11	20.6951	30.13
D63G	0.00256484	0.00256484	0.00377949	0.00265292	0.00407853	0.68	0.51	0.61	1	-5.275	0.03	0.5216	2.36	20.6951	30.13
D63H	0.000532585	0.000532585	0.001094	0.00108869	0.000606927	0.82	0.68	0.53	1	-5.292	0.02	0.5216	0.46	20.6951	30.13
D63N	0.00205964	0.00205964	0.00324677	0.00274251	0.00142654	0.71	0.57	0.4	0.684	-3.658	0.1	0.5216	0.45	20.6951	30.13
D63V	0.00186446	0.00186446	0.00222146	0.00174677	0.00737584	0.6	0.48	0.8	0.355	-5.24	0.12	0.5216	0.08	20.6951	30.13
D63Y	0.000744995	0.000744995	0.000116125	0.000375475	0.00165971	0.13	0.33	0.69	1	-6.627	0.02	0.5216	0.37	20.6951	30.13
G64A	0.000728563	0.000728563	0.00010104	0	0.000224059	0.12	0	0.23	1	-6	0.05	0.2253	0.17	16.8674	34.01
G64E	0.00186798	0.00186798	0	3.0959e-05	0	0	0.01	0	1	-8	0.02	0.2253	5.33	16.8674	34.01
G64R	0.00108316	0.00108316	5.18758e-05	6.1971e-05	0	0.04	0.05	0	1	-8	0.02	0.2253	5.43	16.8674	34.01
G64V	0.00102656	0.00102656	0	0	0	0	0	0	0.484	-8.942	0.88	0.2253	0.52	16.8674	34.01
I65F	0.00164582	0.00164582	0	0	0.000460996	0	0	0.21	0.473	-3.8	0.15	0.219	2.08	13.4879	45.83
I65L	0.000252707	0.000252707	0.000473177	0	0.000815982	0.78	0	0.76	0.287	-1.6	0.17	0.219	0.62	13.4879	45.83
I65M	0	0.000332302	0.000550848	0.000748259	0.00213564	0.73	0.71	0.87	0.67	-2.7	0.09	0.219	0.49	13.4879	45.83
I65N	0.00228065	0.00228065	0	0	0	0	0	0	1	-6.8	0	0.219	3.22	13.4879	45.83
I65S	0.000722955	0.000722955	0	0	0	0	0	0	1	-5.8	0	0.219	5	13.4879	45.83
I65T	0.00219836	0.00219836	0.000413999	0.000415854	0.00031128	0.15	0.15	0.12	0.69	-4.8	0.04	0.219	3.01	13.4879	45.83
I65V	0.00224538	0.00224538	0.00379454	0.010079	0.0194505	0.73	0.88	0.91	0.595	-1	0.2	0.219	1.13	13.4879	45.83
I66F	0.00143543	0.00143543	0	0	0	0	0	0	1	-4	0	0.1848	1.29	10.41	48.58
I66L	3.98342e-06	3.98342e-06	0	0.000406895	0	0	1.71	0	0.632	-2	0.18	0.1848	0.47	10.41	48.58
I66M	0.000401284	0.000401284	0	0	0	0	0	0	1	-3	0	0.1848	0.95	10.41	48.58
I66N	0.00171004	0.00171004	0	0	0	0	0	0	1	-7	0	0.1848	3.03	10.41	48.58
I66S	9.16233e-05	9.16233e-05	0	0	0	0	0	0	1	-6	0	0.1848	4.7	10.41	48.58
I66T	0.00180936	0.00180936	0.000439377	0.000353808	0	0.19	0.16	0	0.642	-4.983	0.03	0.1848	2.06	10.41	48.58
I66V	0.000956337	0.000956337	0.00192878	0.00125962	0.0121447	0.81	0.57	0.96	0.499	-1	0.09	0.1848	0.6	10.41	48.58
G67A	7.13692e-05	7.13692e-05	0	0	1.90437e-05	0	0	0.21	1	-6	0	0.02145	0.7	7.6364	46.65
G67E	0.00219843	0.00219843	0.000175006	0.000123821	0	0.07	0.05	0	1	-8	0	0.02145	4.94	7.6364	46.65
G67R	0.00241121	0.00241121	0.000100228	0.000101009	0	0.03	0.04	0	1	-8	0	0.02145	4.95	7.6364	46.65
G67V	0.00103768	0.00103768	0	0	0	0	0	0	1	-9	0	0.02145	1.14	7.6364	46.65
G67W	0.000819669	0.000819669	0.000242306	0.000143374	0	0.23	0.14	0	1	-8	0	0.02145	3.63	7.6364	46.65
G68A	0.000294404	0.000294404	2.85331e-05	0.000132493	0	0.08	0.31	0	1	-6	0.01	0.04218	-1.38	4.1975	51.51
G68E	0.00185883	0.00185883	0.000275775	0.00025554	2.05979e-05	0.12	0.12	0.01	1	-8	0	0.04218	1.67	4.1975	51.51
G68R	0.00193765	0.00193765	7.4891e-05	0.000139144	0	0.03	0.06	0	1	-8	0	0.04218	-4.55	4.1975	51.51
G68V	0.000937151	0.000937151	0	0	0	0	0	0	1	-9	0	0.04218	-2.76	4.1975	51.51
G68W	0.000730987	0.000730987	0	0	0	0	0	0	1	-8	0	0.04218	-2.8	4.1975	51.51
P69A	0.000211404	0.000211404	0	6.29324e-05	0	0	0.22	0	1	-8	0.04	0.1131	4.55	5.5869	47.98
P69L	0.00168636	0.00168636	0.000373212	0.000390071	0.000284029	0.18	0.18	0.14	1	-10	0.2	0.1131	3.9	5.5869	47.98
P69Q	0.00126914	0.00126914	0	0	0	0	0	0	1	-8	0	0.1131	2.57	5.5869	47.98
P69R	0	0.000349037	0	0	0	0	0	0	1	-9	0	0.1131	7.4	5.5869	47.98
P69S	0.00297327	0.00297327	0.000254874	0.00048724	0.000674718	0.07	0.14	0.18	0.478	-8	0.04	0.1131	5.6	5.5869	47.98
P69T	0.000511095	0.000511095	0	0	0.000263639	0	0	0.34	1	-8	0.03	0.1131	4.53	5.5869	47.98
P70A	0	0.000348751	0	0	0	0	0	0	1	-8	0	0.01966	2.94	4.3888	42.91
P70H	0.00251465	0.00251465	0	0	0	0	0	0	1	-9	0	0.01966	2.94	4.3888	42.91
P70L	0.00139002	0.00139002	1.11924e-05	0	0	0.0075	0	0	1	-10	0	0.01966	1.53	4.3888	42.91
P70R	9.00146e-06	9.00146e-06	0	0	0	0	0	0	1	-9	0	0.01966	2.17	4.3888	42.91
P70S	0.00198439	0.00198439	0	4.2641e-05	0.000303196	0	0.02	0.13	1	-8	0	0.01966	3.89	4.3888	42.91
P70T	0.000591711	0.000591711	0	0	0	0	0	0	1	-8	0	0.01966	2.75	4.3888	42.91
C71F	0.000522881	0.000522881	0	0	0	0	0	0	1	-11	0	0.02381	5.72	0	49.49
C71G	0.000545421	0.000545421	0	0	0	0	0	0	1	-12	0	0.02381	-0.4	0	49.49
C71R	0.00270364	0.00270364	0.00100321	0.00120549	0.000301373	0.27	0.3	0.1	1	-12	0	0.02381	6.19	0	49.49
C71S	0.00242635	0.00242635	0	0	0	0	0	0	1	-10	0	0.02381	-0.74	0	49.49
C71W	0.000252399	0.000252399	0	0	0	0	0	0	1	-11	0	0.02381	7.33	0	49.49
C71Y	0.00228101	0.00228101	4.51979e-05	0	0	0.01	0	0	1	-11	0	0.02381	7.96	0	49.49
Q72E	0.00031556	0.00031556	0	0	0	0	0	0	1	-3	0.01	0.02556	-1.75	3.0442	45.63
Q72H	0.00225508	0.00225508	1.94112e-05	3.1104e-05	0.000410723	0.0075	0.01	0.15	1	-5	0	0.02556	1.01	3.0442	45.63
Q72K	0.000600466	0.000600466	0	0	0.00059869	0	0	0.49	1	-4	0.01	0.02556	0.49	3.0442	45.63
Q72L	0.00158624	0.00158624	0	0	0	0	0	0	1	-7	0.01	0.02556	0.68	3.0442	45.63
Q72P	0.000224391	0.000224391	0	0	0	0	0	0	0.632	-6	0.22	0.02556	-1.17	3.0442	45.63
Q72R	0.00253212	0.00253212	0.000661704	0.000776552	0.000396264	0.2	0.23	0.13	1	-4	0.01	0.02556	0.52	3.0442	45.63
S73A	2.51923e-05	2.51923e-05	4.40061e-05	0	0.000188326	0.75	0	0.89	0.509	-3	0.12	0.03454	-0.43	5.9643	38.15
S73C	0.000561202	0.000561202	3.29144e-05	0.000269811	0	0.05	0.32	0	1	-5	0.01	0.03454	0.11	5.9643	38.15
S73F	0.00151918	0.00151918	0	0	0	0	0	0	1	-6	0	0.03454	5.81	5.9643	38.15
S73P	0.00137662	0.00137662	0.00443999	0.00449248	0.00806594	1.03	0.8	0.86	1	-5	0.02	0.03454	-1.19	5.9643	38.15
S73T	0.00162182	0.00162182	0.0013787	0.000625399	0.00258229	0.49	0.27	0.61	1	-3	0.02	0.03454	-0.19	5.9643	38.15
S73Y	0.00227187	0.00227187	0	0	0	0	0	0	1	-6	0	0.03454	6.57	5.9643	38.15
W74C	0.00128658	0.00128658	0	0	0	0	0	0	1	-13	0	0.06846	3.39	6.766	53.49
W74G	0.000295824	0.000295824	0	0	0	0	0	0	1	-13	0	0.06846	4.54	6.766	53.49
W74L	0.000339946	0.000339946	0	0	0	0	0	0	1	-13	0.01	0.06846	1.68	6.766	53.49
W74R	0.00351479	0.00351479	0.000638939	0.000629967	0.000204957	0.15	0.15	0.05	1	-14	0	0.06846	3.67	6.766	53.49
W74S	0.000174486	0.000174486	0	0	0	0	0	0	1	-14	0	0.06846	4.57	6.766	53.49
S75C	0.00202848	0.00202848	0	0.00036207	0.000580292	0	0.15	0.22	1	-5	0	0.01356	1.43	5.4568	43.91
S75G	0.00276168	0.00276168	0.000918397	0.00103125	0.000572381	0.25	0.27	0.17	1	-4	0	0.01356	1.86	5.4568	43.91
S75I	0.0012729	0.0012729	0	0	0	0	0	0	1	-6	0	0.01356	1.3	5.4568	43.91
S75N	0.0027169	0.0027169	0	0	0	0	0	0	1	-3	0	0.01356	3.93	5.4568	43.91
S75R	0.00238588	0.00238588	0	0	0	0	0	0	1	-5	0	0.01356	9.08	5.4568	43.91
S75T	0.000713206	0.000713206	0	0	0	0	0	0	1	-3	0	0.01356	0.76	5.4568	43.91
E76A	0.000306568	0.000306568	0.000472894	0.000447243	0.000875069	0.7	0.6	0.74	0.291	-5.367	0.07	0.2143	2.32	8.3285	41.97
E76D	0.00249617	0.00249617	0.00206944	0.00295562	0.00216509	0.48	0.54	0.46	0.689	-2.867	0.09	0.2143	0.94	8.3285	41.97
E76G	0.00215769	0.00215769	0.00250397	0.00447613	0.00240993	0.59	0.69	0.52	1	-6.533	0.02	0.2143	2.58	8.3285	41.97
E76K	0.00159384	0.00159384	0.000111342	0.000363864	0.000942676	0.06	0.18	0.37	1	-3.733	0.04	0.2143	1.97	8.3285	41.97
E76Q	0	0.000326213	0	0	0.00166626	0	0	0.84	0.645	-2.8	0.1	0.2143	0.81	8.3285	41.97
E76V	0.00139171	0.00139171	0.00257486	0.00550669	0.0133148	0.77	0.85	0.93	0.26	-6.3	0.04	0.2143	1.71	8.3285	41.97
G77A	0.000380494	0.000380494	6.25103e-05	0.000674257	0.000646398	0.14	0.65	0.62	0.249	2.833	1	0.1266	-0.7	8.8133	36.2
G77E	0.00209949	0.00209949	5.21576e-05	0.000115733	0	0.02	0.05	0	1	-1.817	0	0.1266	2.02	8.8133	36.2
G77R	0.00248518	0.00248518	5.90594e-05	0.000401644	0.000554527	0.02	0.13	0.18	1	-1.817	0	0.1266	9.66	8.8133	36.2
G77V	0.00108679	0.00108679	0.000307525	0.000734099	0.00084223	0.22	0.4	0.43	1	-1.05	0	0.1266	-0.12	8.8133	36.2
G77W	0.00114392	0.00114392	0	0	0	0	0	0	1	-3.583	0	0.1266	5.92	8.8133	36.2
G78A	0.000198644	0.000198644	0	0	0	0	0	0	1	-6	0	0.02145	1.7	9.6616	34.42
G78E	0.00245491	0.00245491	4.38425e-05	9.41695e-05	0	0.01	0.03	0	1	-8	0	0.02145	2.5	9.6616	34.42
G78R	0.00252763	0.00252763	5.07854e-05	0.00011145	0	0.01	0.04	0	1	-8	0	0.02145	1.03	9.6616	34.42
G78V	0.000649898	0.000649898	0	0	0	0	0	0	1	-9	0	0.02145	2.78	9.6616	34.42
S79A	8.98509e-05	8.98509e-05	0.000116211	0.000119316	0.000354076	0.63	0.57	0.8	0.355	-0.182	1	0.6366	-0.6	9.7903	36.48
S79C	0	0.000348115	0	0	0.000131401	0	0	0.27	0.468	-2.522	0.05	0.6366	-0.86	9.7903	36.48
S79F	0.00106406	0.00106406	0.0010758	0.000627793	0.00263288	0.54	0.37	0.71	1	-4.102	0.02	0.6366	-0.57	9.7903	36.48
S79P	0.00206904	0.00206904	0.00148849	0.0019677	0.00194886	0.44	0.48	0.48	0.632	-3.091	0.73	0.6366	-0.21	9.7903	36.48
S79T	0.00122814	0.00122814	0.000874488	0.000284227	0.00827157	0.43	0.18	0.88	0.32	-1.504	0.37	0.6366	0.13	9.7903	36.48
S79Y	0.00229978	0.00229978	0.00107245	4.37311e-05	0.00569199	0.32	0.01	0.71	1	-3.958	0.02	0.6366	0.08	9.7903	36.48
L80F	0.000809271	0.000809271	0.000332625	0.000673297	0.0022734	0.29	0.45	0.73	1	-2.88	0.04	0.4784	-0.54	11.2141	39.49
L80H	0.00245781	0.00245781	0.00338271	0.00889841	0.0145965	0.65	0.83	0.86	1	-4.157	0.13	0.4784	1.13	11.2141	39.49
L80I	0.00135374	0.00135374	0.000234015	0.000143799	0.000628426	0.14	0.09	0.31	1	-1.582	0.07	0.4784	0.46	11.2141	39.49
L80P	0.00223094	0.00223094	0.000771266	0.00088438	0.000972576	0.26	0.28	0.3	1	-4.374	0.12	0.4784	0.03	11.2141	39.49
L80R	0.000970595	0.000970595	0.00070326	0.000140221	0.0011115	0.44	0.12	0.53	0.443	-2.923	0.85	0.4784	0.55	11.2141	39.49
L80V	0	0.000348751	0	0	0	0	0	0	1	-1.974	0.09	0.4784	0.84	11.2141	39.49
R81G	0.00195201	0.00195201	0.00287979	0.00197153	0.00116585	0.68	0.5	0.37	0.48	-6.368	0.02	0.2436	1.21	10.5797	34.38
R81I	0.0018277	0.0018277	0.000362588	3.72258e-06	0.000744982	0.16	0.002	0.28	1	-7.368	0	0.2436	1.24	10.5797	34.38
R81K	0.00189464	0.00189464	0.00324744	0.00479279	0.0086385	0.74	0.74	0.82	0.263	-1.736	0.28	0.2436	0.88	10.5797	34.38
R81S	0.0015709	0.0015709	0.00106807	0.000264425	0.0040917	0.42	0.14	0.72	1	-5.157	0.01	0.2436	1.15	10.5797	34.38
R81T	0	0.000326702	1.56759e-06	0	0	0.002	0	0	1	-5.368	0.01	0.2436	0.34	10.5797	34.38
G82A	0.00034253	0.00034253	0	0	0	0	0	0	1	-6	0.09	0.1269	-0.29	11.3958	31.12
G82E	0.00132749	0.00132749	0	0	0	0	0	0	1	-8	0.07	0.1269	-0.93	11.3958	31.12
G82R	0.00139404	0.00139404	0	0	0	0	0	0	1	-8	0.23	0.1269	-0.44	11.3958	31.12
G82V	0.000651817	0.000651817	0	0	0	0	0	0	1	-9	0.03	0.1269	-0.23	11.3958	31.12
I83F	0.00177068	0.00177068	0.00222751	0.00126098	0.00477908	0.62	0.41	0.73	1	-4	0	0.1226	0.67	13.0278	35.43
I83L	0.000318939	0.000318939	0.000405391	0	8.95391e-05	0.62	0	0.21	0.509	-2	0.22	0.1226	-0.39	13.0278	35.43
I83M	0.000195184	0.000195184	0.000628094	0.000644084	0.00355257	1.03	0.81	0.999999	1	-3	0	0.1226	-0.35	13.0278	35.43
I83N	0.00157077	0.00157077	0	0.000606922	0.000824282	0	0.27	0.34	1	-7	0	0.1226	1.26	13.0278	35.43
I83S	0.000233262	0.000233262	0	0	0	0	0	0	1	-6	0	0.1226	1.23	13.0278	35.43
I83T	0.00268456	0.00268456	0.00200818	0.00139848	0.00204708	0.45	0.34	0.43	1	-5	0	0.1226	2.58	13.0278	35.43
I83V	0.00230377	0.00230377	0.00389778	0.00446	0.00590881	0.73	0.67	0.72	0.674	-1	0.07	0.1226	1.26	13.0278	35.43
D84A	9.99495e-05	9.99495e-05	0.000676708	0	0	1.465	0	0	0.477	-3.595	0.02	0.8491	0.41	14.2152	25.97
D84E	0.00218023	0.00218023	0.00354816	0.00932279	0.014451	0.72	0.87	0.88	0.281	-0.012	0.49	0.8491	-1.96	14.2152	25.97
D84G	0.00185249	0.00185249	0.00280193	0.00879299	0.00426545	0.69	0.9	0.69	1	-3.219	0	0.8491	0.64	14.2152	25.97
D84H	0.000211517	0.000211517	0.00058402	0.00090812	0.0121495	0.95	0.87	1.12	1	-2.139	0	0.8491	0.09	14.2152	25.97
D84N	0.00144341	0.00144341	0.0017327	0.00547523	0.0107327	0.6	0.84	0.89	0.249	0.077	0.42	0.8491	-0.02	14.2152	25.97
D84V	0.00177811	0.00177811	0.00100443	0.00106471	0.00170666	0.37	0.37	0.48	1	-4.629	0	0.8491	0.62	14.2152	25.97
D84Y	0.000653139	0.000653139	0.000183471	0.000121458	0.000569263	0.22	0.15	0.46	1	-4.321	0	0.8491	-0.41	14.2152	25.97
D85A	0.000311682	0.000311682	0	0	0	0	0	0	1	-8	0	0.02416	3.13	10.4396	33.89
D85E	0.00402434	0.00402434	0.0026174	0.00230763	0.00397248	0.41	0.36	0.49	1	-4	0	0.02416	2.43	10.4396	33.89
D85G	0.00232969	0.00232969	0.000809946	0.000774942	0.000305204	0.26	0.24	0.11	1	-7	0	0.02416	3.34	10.4396	33.89
D85H	0	0.00032609	0	0	0	0	0	0	1	-7	0	0.02416	2	10.4396	33.89
D85N	0.00205686	0.00205686	1.16826e-05	4.83323e-05	7.30664e-05	0.005	0.02	0.03	0.645	-5	0.06	0.02416	2.1	10.4396	33.89
D85V	0.0025837	0.0025837	0	0	0	0	0	0	1	-9	0	0.02416	2.36	10.4396	33.89
D85Y	0.000537473	0.000537473	0	0	0	0	0	0	1	-9	0	0.02416	0.83	10.4396	33.89
P86A	0.000656352	0.000656352	0.0007161	0.0051838	0.03421	0.57	1.03	1.105	0.334	-1.03	0.71	1.071	1.2	11.6892	30.53
P86H	0.00253543	0.00253543	0.00369981	0.00270769	0.00579417	0.68	0.51	0.69	0.427	-1.503	0.11	1.071	1.14	11.6892	30.53
P86L	0.00182661	0.00182661	0.00249479	0.00537634	0.0141266	0.65	0.78	0.9	0.378	-3.183	0.23	1.071	0.11	11.6892	30.53
P86R	0.000456552	0.000456552	0.000568677	0.00191056	0.00232056	0.62	0.87	0.84	1	-1.181	0.38	1.071	-0.86	11.6892	30.53
P86S	0.00151264	0.00151264	0.00327036	0.0154985	0.0622272	0.84	1.09	1.09	0.33	-0.654	0.68	1.071	0.74	11.6892	30.53
P86T	0.000865666	0.000865666	0.00108145	0.00117505	0.00178855	0.62	0.58	0.67	1	-1.546	0.41	1.071	1.41	11.6892	30.53
R87G	0.000245719	0.000245719	0	0	0	0	0	0	1	-7	0	0.0255	3.89	7.1461	46.83
R87L	0.00168485	0.00168485	0.00102	0.00254594	0.00289244	0.39	0.6	0.63	0.645	-7	0.06	0.0255	2.08	7.1461	46.83
R87P	0	0.000326637	0	0	0	0	0	0	1	-7	0	0.0255	4.2	7.1461	46.83
R87Q	0.00279477	0.00279477	0.00218854	0.00149389	0.0014996	0.46	0.34	0.34	1	-4	0	0.0255	2.6	7.1461	46.83
R87W	0.0017554	0.0017554	0.000134746	0.000204021	0.00011901	0.07	0.1	0.06	1	-8	0	0.0255	2.29	7.1461	46.83
G88A	0.000652459	0.000652459	4.93686e-05	0	2.44678e-06	0.07	0	0.002	1	-6	0	0.03219	-0.83	9.5829	38.42
G88C	0.000990837	0.000990837	0	0	0	0	0	0	1	-9	0	0.03219	1.95	9.5829	38.42
G88D	0.00344166	0.00344166	0.000420397	0.000471505	0.000543025	0.1	0.12	0.13	1	-7	0.01	0.03219	5.42	9.5829	38.42
G88R	0.000169061	0.000169061	0	0	0	0	0	0	1	-8	0	0.03219	7.21	9.5829	38.42
G88S	0.00150324	0.00150324	5.24865e-05	2.65014e-05	0.000140025	0.03	0.01	0.08	1	-6	0.01	0.03219	0.12	9.5829	38.42
G88V	0.000565447	0.000565447	0	0	0	0	0	0	1	-9	0	0.03219	1.33	9.5829	38.42
K89E	0.00210479	0.00210479	0.00274344	0.00234848	0.00303294	0.63	0.53	0.59	1	-0.333	0.26	0.6013	0.84	12.0356	38.22
K89I	0.000728619	0.000728619	0.000813078	0.000709923	0.00233911	0.58	0.49	0.76	1	-4.687	0.3	0.6013	-0.08	12.0356	38.22
K89N	0.00167272	0.00167272	0.000248414	0.000696154	0.000675762	0.12	0.29	0.28	1	-1.92	0.26	0.6013	0.87	12.0356	38.22
K89Q	0	0.000313685	0	0	0	0	0	0	0.249	1.843	1	0.6013	0.36	12.0356	38.22
K89R	0.00216356	0.00216356	0.00477229	0.0111196	0.0122638	0.85	0.92	0.85	0.291	-0.44	0.67	0.6013	-0.1	12.0356	38.22
K89T	0.000297648	0.000297648	0.000186039	0	0	0.4	0	0	0.635	-2.837	0.36	0.6013	1.57	12.0356	38.22
L90F	0.00211742	0.00211742	0.00033526	0.000138688	0.00149831	0.13	0.06	0.41	1	-4	0	0.0683	-0.23	10.2238	43.58
L90H	0.00166478	0.00166478	0.000259966	0	0.00120418	0.13	0	0.41	1	-7	0	0.0683	1.17	10.2238	43.58
L90I	0.000562093	0.000562093	0	0	0	0	0	0	1	-2	0	0.0683	0.11	10.2238	43.58
L90P	0.00450577	0.00450577	0.00135665	0.00143498	0.0006171	0.23	0.24	0.12	1	-7	0	0.0683	1.84	10.2238	43.58
L90R	0.000749887	0.000749887	0	0	0	0	0	0	1	-6	0	0.0683	-0.48	10.2238	43.58
L90V	0.000470604	0.000470604	0.000806671	0.00762248	0.000721893	0.74	1.21	0.6	0.493	-3	0.01	0.0683	0.59	10.2238	43.58
F91C	0.00107056	0.00107056	0	0	0	0	0	0	1	-8	0	0.1271	3.05	10.1572	56.94
F91I	0.00106121	0.00106121	0.00100937	0.000932454	0.00668486	0.52	0.46	0.87	0.595	-6	0.03	0.1271	2.05	10.1572	56.94
F91L	0.00425468	0.00425468	0.00283651	0.00595909	0.00481463	0.41	0.58	0.53	0.54	-6	0.03	0.1271	1.81	10.1572	56.94
F91S	0.00102379	0.00102379	0.000214266	0.000186207	0	0.17	0.15	0	1	-8	0	0.1271	4.08	10.1572	56.94
F91V	0.000673005	0.000673005	0.000702822	0.00721664	0.000257448	0.55	1.105	0.27	0.464	-7	0.02	0.1271	2.43	10.1572	56.94
F91Y	0.00195921	0.00195921	0.000425016	0.000353131	0.0014048	0.17	0.15	0.41	0.632	-3	0.44	0.1271	-0.5	10.1572	56.94
Y92C	0.0012426	0.0012426	0.00160772	0.00175932	0.00907701	0.63	0.59	0.89	1	-6.566	0.04	0.8171	3.24	13.7097	39.22
Y92D	5.82311e-05	5.82311e-05	0	0	0	0	0	0	1	-7.766	0.05	0.8171	2.51	13.7097	39.22
Y92F	0.000944215	0.000944215	0.00106755	0.00680225	0.00449162	0.58	0.999999	0.83	0.355	-0.816	0.79	0.8171	0.93	13.7097	39.22
Y92H	0.00135737	0.00135737	0.00263249	0.00356358	0.00161257	0.79	0.75	0.54	1	-4.317	0.13	0.8171	2.34	13.7097	39.22
Y92N	0.000480565	0.000480565	0.00035145	0.000364893	0	0.44	0.43	0	1	-7.15	0.07	0.8171	2.39	13.7097	39.22
Y92S	0	0.00031701	0	0	0	0	0	0	0.634	-6.666	0.14	0.8171	1.84	13.7097	39.22
E93A	0.000143274	0.000143274	0	0.000263563	0	0	0.66	0	0.473	-5.135	0.07	0.4466	0.87	13.0323	40.5
E93D	0.00247925	0.00247925	0.00454813	0.00535915	0.00556373	0.77	0.7	0.69	0.355	-0.237	0.71	0.4466	0.82	13.0323	40.5
E93G	0.0021898	0.0021898	0.000926962	0.000872641	0.00108272	0.3	0.28	0.33	1	-5.354	0.03	0.4466	2.87	13.0323	40.5
E93K	0.000942696	0.000942696	0	7.06879e-05	0	0	0.06	0	1	-3.526	0.04	0.4466	0.83	13.0323	40.5
E93Q	0.000129569	0.000129569	0.000359606	0.000111293	0.000823122	0.96	0.46	0.87	0.263	-2.443	0.11	0.4466	-0.04	13.0323	40.5
E93V	0.00126247	0.00126247	0	0	3.05624e-05	0	0	0.02	1	-6.135	0.02	0.4466	-0.13	13.0323	40.5
Y94C	0.0014833	0.0014833	0.000696704	0.000463779	0.000129611	0.32	0.23	0.08	1	-7.933	0	0.161	3.48	10.8244	55.55
Y94D	0	0.000332887	0	0	0	0	0	0	1	-8.933	0	0.161	3.32	10.8244	55.55
Y94F	0.00111741	0.00111741	0.000524682	0.0012486	0.00153463	0.32	0.53	0.57	0.463	-2.133	0.5	0.161	-0.88	10.8244	55.55
Y94H	0.00117762	0.00117762	0.000459433	0.00033651	0.000425154	0.28	0.22	0.26	1	-4.733	0	0.161	2.42	10.8244	55.55
Y94N	0.0016454	0.0016454	0	0	0	0	0	0	1	-8.2	0	0.161	3.7	10.8244	55.55
Y94S	0.00011237	0.00011237	0	0	0	0	0	0	1	-7.933	0	0.161	4.43	10.8244	55.55
I95F	0.0016653	0.0016653	0.00117256	0.00108702	0.00276157	0.43	0.39	0.62	1	-3.833	0	0.1907	2.16	14.6054	39.93
I95L	4.15267e-05	4.15267e-05	0	0	0	0	0	0	0.37	-1.767	0.05	0.1907	-0.28	14.6054	39.93
I95M	0.000115335	0.000115335	0	0	0	0	0	0	0.477	-2.633	0.02	0.1907	0.17	14.6054	39.93
I95N	0.00271706	0.00271706	0.00182408	0.00238819	0.00308891	0.42	0.46	0.53	1	-6.767	0	0.1907	2.14	14.6054	39.93
I95S	0.000576634	0.000576634	0.00105775	0.000187437	0	0.77	0.24	0	1	-5.767	0	0.1907	3.27	14.6054	39.93
I95T	0.00238031	0.00238031	0.00273966	0.00893156	0.00804937	0.59	0.84	0.77	1	-4.767	0	0.1907	3.06	14.6054	39.93
I95V	0.000834962	0.000834962	0.00232636	0.00101741	0.0100095	0.96	0.55	0.95	0.473	-0.9	0.22	0.1907	1.12	14.6054	39.93
R96G	0.000455603	0.000455603	2.0536e-05	0	0	0.04	0	0	1	-7	0	0.1347	4.44	15.8203	42.71
R96L	0.00141033	0.00141033	0	0	0.000166857	0	0	0.1	1	-7	0	0.1347	2.89	15.8203	42.71
R96P	0.0003212	0.0003212	0	0	0	0	0	0	1	-7	0	0.1347	6.69	15.8203	42.71
R96Q	0.00223528	0.00223528	0.000167373	0.000457849	0.000899831	0.06	0.17	0.28	0.637	-4	0.02	0.1347	3.39	15.8203	42.71
R96W	0.00193404	0.00193404	0.000613222	0.000247381	0.000784782	0.24	0.11	0.28	1	-8	0	0.1347	3	15.8203	42.71
I97F	0.00185913	0.00185913	0.00277055	0.00202251	0.0033962	0.68	0.52	0.64	1	-3.8	0.01	0.3354	2.06	14.8175	43.79
I97L	6.31348e-05	6.31348e-05	0.000311082	0	0	1.265	0	0	0.33	-1.6	0.3	0.3354	0.04	14.8175	43.79
I97M	0.000850355	0.000850355	0.00172514	0.00489601	0.00083755	0.81	0.95	0.49	1	-2.55	0.01	0.3354	0.3	14.8175	43.79
I97N	0.00426793	0.00426793	0	0	0.000143098	0	0	0.03	1	-6.65	0.01	0.3354	2.86	14.8175	43.79
I97S	0.000831499	0.000831499	0	0	0	0	0	0	0.684	-5.65	0.03	0.3354	3.92	14.8175	43.79
I97T	0.00183084	0.00183084	0.00122219	0.00163189	0.00202302	0.41	0.47	0.52	1	-4.5	0.03	0.3354	2.38	14.8175	43.79
I97V	0.00159044	0.00159044	0.00218597	0.00741635	0.00540558	0.65	0.89	0.77	0.32	-0.7	0.23	0.3354	1.13	14.8175	43.79
L98F	0.00189928	0.00189928	0.00147313	0.00137097	0.0008882	0.46	0.41	0.31	1	-4	0	0.2543	2.26	16.9954	43.53
L98I	0.00231991	0.00231991	0.00224802	0.00650275	0.0138734	0.53	0.76	0.86	0.464	-2	0.2	0.2543	0.51	16.9954	43.53
L98S	0.000811154	0.000811154	0.000332113	0.000286505	2.74626e-05	0.29	0.26	0.03	1	-6	0	0.2543	4.64	16.9954	43.53
L98V	0.000692283	0.000692283	0.00065561	0.000981811	0.00133213	0.52	0.59	0.65	0.473	-3	0.14	0.2543	1.11	16.9954	43.53
K99E	0.00230422	0.00230422	0.00316612	0.0070595	0.011703	0.65	0.79	0.84	0.42	-2.402	0.34	0.7342	0.74	19.5455	34.95
K99I	0.00180734	0.00180734	0.002101	0.00488085	0.00478149	0.59	0.75	0.72	0.724	-6.241	0.1	0.7342	-0.07	19.5455	34.95
K99N	0.00303497	0.00303497	0.00402242	0.0036042	0.0203897	0.64	0.54	0.88	0.645	-3.533	0.17	0.7342	0.62	19.5455	34.95
K99Q	0.000445497	0.000445497	0.00105801	0.000206471	0.0189961	0.88	0.31	1.09	0.361	-2.356	0.12	0.7342	-0.02	19.5455	34.95
K99R	0.00135186	0.00135186	0.00362119	0.00649182	0.00942401	0.94	0.9	0.88	0.287	-1.312	0.3	0.7342	0.24	19.5455	34.95
K99T	0.000914779	0.000914779	0.00126218	0.00100429	0.000763928	0.65	0.52	0.45	0.373	-4.249	0.12	0.7342	1.32	19.5455	34.95
Q100E	0.000599283	0.000599283	0.00144959	0.00359191	0.0186298	0.89	0.96	1.06	0.281	1.729	0.83	0.8581	-0.67	21.1648	27.2
Q100H	0.00138381	0.00138381	0.00344318	0.00935562	0.0107136	0.9	0.99	0.9	0.484	-1.019	0.07	0.8581	0.01	21.1648	27.2
Q100K	0.0027409	0.0027409	0.00034242	0.000458808	0.00040285	0.11	0.14	0.12	0.364	-0.823	0.32	0.8581	-0.13	21.1648	27.2
Q100L	0.00160684	0.00160684	0.000979882	0.00143421	0.0037803	0.39	0.47	0.7	0.642	-3.494	0.2	0.8581	-0.42	21.1648	27.2
Q100P	4.3547e-05	4.3547e-05	0	0	0	0	0	0	1	-1.263	0.08	0.8581	0.14	21.1648	27.2
Q100R	0.00219872	0.00219872	0.00460508	0.00892704	0.0412397	0.83	0.86	1.01	0.464	-1.682	0.23	0.8581	-1.29	21.1648	27.2
K101E	0.00178634	0.00178634	0.00111149	0.00171778	0.00083695	0.39	0.49	0.31	1	-3.578	0.02	0.3089	0.38	19.4481	36.1
K101I	0.00224844	0.00224844	0.00330925	0.002314	0.00619768	0.68	0.5	0.73	0.309	-6.769	0.17	0.3089	-0.43	19.4481	36.1
K101N	0.00181401	0.00181401	0.00236078	0.00402223	0.00872533	0.63	0.7	0.83	1	-4.426	0.01	0.3089	0.3	19.4481	36.1
K101Q	0.000637822	0.000637822	0.000971305	0.00287683	0.0022577	0.69	0.88	0.78	1	-3.545	0.02	0.3089	0.3	19.4481	36.1
K101R	0.00152613	0.00152613	0.00261072	0.0036066	0.0104543	0.74	0.72	0.88	1	-2.661	0.01	0.3089	0.18	19.4481	36.1
K101T	0.000938411	0.000938411	0.00288871	0.0004204	0.0129848	1.01	0.3	0.97	0.355	-4.976	0.25	0.3089	-0.06	19.4481	36.1
K102E	0.00162672	0.00162672	0.00663848	0.00422395	0.0193682	1.16	0.74	0.95	1	-1.038	0.03	0.6825	0.97	21.8215	32.55
K102I	0.000902554	0.000902554	0.00101698	0.00277911	0.0734986	0.58	0.79	1.15	1	-5.428	0.01	0.6825	0.98	21.8215	32.55
K102N	0.00225145	0.00225145	0.00166338	0.00330094	0.00159712	0.44	0.6	0.41	0.729	-2.433	0.05	0.6825	-0.1	21.8215	32.55
K102Q	0.000324132	0.000324132	0.000870146	0.0040116	0.0112182	0.94	1.14	1.07	0.249	0.573	1	0.6825	0.37	21.8215	32.55
K102R	0.00106652	0.00106652	0.00258316	0.00268217	0.00428724	0.89	0.74	0.8	0.435	-1.235	0.21	0.6825	-0.68	21.8215	32.55
K102T	0.000187497	0.000187497	0.0010566	0.00335612	0.00350484	1.35	1.235	1.01	0.359	-3.351	0.06	0.6825	1.03	21.8215	32.55
P103A	0.000211709	0.000211709	2.18484e-05	0.000154056	0	0.09	0.42	0	1	-8	0	0.01966	2.16	19.5315	35.92
P103L	0.00139922	0.00139922	3.27161e-05	2.43732e-05	0.000479253	0.02	0.01	0.25	1	-10	0	0.01966	2.52	19.5315	35.92
P103Q	0.00111148	0.00111148	0	0	0	0	0	0	1	-8	0	0.01966	3.27	19.5315	35.92
P103R	6.55538e-05	6.55538e-05	0	0	0	0	0	0	1	-9	0	0.01966	2.97	19.5315	35.92
P103S	0.00166413	0.00166413	0.00124884	0.00311083	0.00287862	0.45	0.66	0.63	1	-8	0	0.01966	2.58	19.5315	35.92
P103T	0.00739885	0.00739885	0.00591107	0.00486156	0.0089313	0.47	0.39	0.54	1	-8	0	0.01966	3.21	19.5315	35.92
K104E	0.00192747	0.00192747	0.00342843	0.0043293	0.00387792	0.76	0.71	0.66	0.48	-2.484	0.66	1.094	1.54	22.496	35.37
K104I	0.0013269	0.0013269	0.0028439	0.00703204	0.0213764	0.84	0.93	0.99	0.595	-4.276	0.19	1.094	0	22.496	35.37
K104N	0.00229441	0.00229441	0.00277788	0.00532479	0.0311234	0.61	0.72	0.97	0.451	-2.942	0.34	1.094	0.16	22.496	35.37
K104Q	0.000385855	0.000385855	0.00107116	0.00106192	0.00393471	0.96	0.76	0.94	0.468	-2.192	0.39	1.094	1.08	22.496	35.37
K104R	0.000882388	0.000882388	0.00290979	0.0035986	0.0278255	1.04	0.86	1.06	0.299	-1.835	0.39	1.094	0.85	22.496	35.37
K104T	0.000485161	0.000485161	0.00177048	0.000592778	0.00323715	1.1	0.55	0.88	0.509	-3.359	0.4	1.094	1.53	22.496	35.37
F105C	4.9344e-05	4.9344e-05	0	0	0	0	0	0	1	-8	0	0.1562	3.64	17.8086	47.72
F105I	0.00210615	0.00210615	0	0	0.000676539	0	0	0.24	0.681	-6	0.06	0.1562	1.48	17.8086	47.72
F105L	0.00306583	0.00306583	0.000874987	0.000967764	0.000803247	0.22	0.23	0.2	1	-6	0.01	0.1562	1.48	17.8086	47.72
F105S	0.00205353	0.00205353	0.00104341	0.00122208	0.000407092	0.34	0.37	0.16	1	-8	0.02	0.1562	3.3	17.8086	47.72
F105V	0.000546804	0.000546804	0	0	0	0	0	0	1	-7	0.01	0.1562	2.27	17.8086	47.72
F105Y	0.000618553	0.000618553	0	0	0.000159518	0	0	0.2	1	-3	0	0.1562	0.96	17.8086	47.72
F106C	0.000421846	0.000421846	0.000764267	0.000446187	0	0.76	0.51	0	1	-8	0	0.02172	3.48	15.8802	49.78
F106I	0.00154918	0.00154918	0	0	0.000111366	0	0	0.06	1	-6	0	0.02172	2.24	15.8802	49.78
F106L	0.00357681	0.00357681	0.00195528	0.00170533	0.00141035	0.36	0.32	0.28	1	-6	0	0.02172	1.55	15.8802	49.78
F106S	0.00211992	0.00211992	0.000457728	0.000380682	0.000222558	0.17	0.15	0.09	1	-8	0	0.02172	2.66	15.8802	49.78
F106V	0.000426563	0.000426563	0	0	0	0	0	0	1	-7	0	0.02172	2.45	15.8802	49.78
F106Y	0.00228973	0.00228973	0.00248635	0.00572292	0.00127888	0.57	0.73	0.35	1	-3	0	0.02172	-0.02	15.8802	49.78
L107F	0.00060258	0.00060258	0.000489989	3.5117e-05	0.000118613	0.47	0.05	0.16	1	-3.6	0.01	0.3793	0.1	11.7254	54.74
L107H	0.00315711	0.00315711	0	0	0	0	0	0	1	-6.4	0	0.3793	3.03	11.7254	54.74
L107I	0.00133377	0.00133377	0.000435518	0.00583874	0.000458406	0.24	0.88	0.25	0.484	-1.2	0.33	0.3793	0.49	11.7254	54.74
L107P	0.00264805	0.00264805	0.00088944	0.000976961	0.000325216	0.25	0.26	0.1	1	-6.2	0	0.3793	3.2	11.7254	54.74
L107R	0.000852479	0.000852479	0	0	0	0	0	0	1	-5.6	0	0.3793	4.03	11.7254	54.74
L107V	5.18754e-05	5.18754e-05	0	2.84843e-05	0	0	0.35	0	0.355	-1.8	0.59	0.3793	0.68	11.7254	54.74
A108D	0.0006209	0.0006209	0	0	0	0	0	0	1	-5.9	0	0.08338	-0.52	10.8339	49.87
A108G	0.000538854	0.000538854	0	6.12842e-05	0	0	0.1	0	0.635	-3.967	0.05	0.08338	1.83	10.8339	49.87
A108P	0.00040667	0.00040667	0	0	0	0	0	0	1	-4.9	0.01	0.08338	-1.04	10.8339	49.87
A108S	0.000383879	0.000383879	0.000254832	0.000406971	1.01384e-05	0.41	0.51	0.02	1	-2.967	0.01	0.08338	-0.6	10.8339	49.87
A108T	0.00315064	0.00315064	0.00241264	0.00206441	0.00439794	0.45	0.39	0.58	1	-3.867	0.01	0.08338	-0.41	10.8339	49.87
A108V	0.00375231	0.00375231	0.00590757	0.00841023	0.0103681	0.71	0.71	0.73	0.451	-3.733	0.09	0.08338	-2.33	10.8339	49.87
E109A	3.93997e-05	3.93997e-05	0	0	0	0	0	0	1	-6	0	0.01657	0.42	6.3966	60.69
E109D	0.00185639	0.00185639	0	0	0	0	0	0	1	-3	0	0.01657	0.29	6.3966	60.69
E109G	0.0011747	0.0011747	0.000197565	0.00025322	0	0.14	0.17	0	1	-7	0	0.01657	0.4	6.3966	60.69
E109K	0.00219241	0.00219241	0.000208186	0.000163535	8.42378e-05	0.08	0.06	0.03	1	-4	0	0.01657	-1.25	6.3966	60.69
E109Q	0	0.000326121	0	0	0	0	0	0	1	-3	0	0.01657	0.29	6.3966	60.69
E109V	0.000889748	0.000889748	0	0	0	0	0	0	1	-7	0	0.01657	-0.89	6.3966	60.69
N110D	0.00236868	0.00236868	0.000714504	0.000804765	0.000212243	0.23	0.25	0.08	1	-5	0	0.01418	3.02	5.6326	52.52
N110H	0.000392996	0.000392996	0	0	0	0	0	0	1	-5	0	0.01418	5.01	5.6326	52.52
N110I	0.000875742	0.000875742	0	0	0	0	0	0	1	-9	0	0.01418	1.16	5.6326	52.52
N110K	0.00155481	0.00155481	0	0	0	0	0	0	1	-6	0	0.01418	3.56	5.6326	52.52
N110S	0.00177866	0.00177866	0.00199568	0.00148787	0.00193435	0.58	0.45	0.52	1	-5	0	0.01418	1.61	5.6326	52.52
N110T	0.000746116	0.000746116	0.000325733	0.00022921	8.87479e-05	0.31	0.23	0.1	1	-6	0	0.01418	0.75	5.6326	52.52
N110Y	0.000781875	0.000781875	0	0	0	0	0	0	1	-8	0	0.01418	3.95	5.6326	52.52
V111A	0.0019508	0.0019508	0.000663491	0.000830816	0.000559175	0.25	0.29	0.22	1	-4	0	0.01438	0.94	4.7212	51.42
V111D	0.00106029	0.00106029	0	0	0	0	0	0	1	-7	0	0.01438	3.01	4.7212	51.42
V111F	0.00056409	0.00056409	0	0	0	0	0	0	1	-5	0	0.01438	5.67	4.7212	51.42
V111G	0.000422318	0.000422318	0	0	0	0	0	0	1	-7	0	0.01438	1.11	4.7212	51.42
V111I	0.0027527	0.0027527	0	3.5695e-05	0.00115892	0	0.01	0.29	1	-1	0	0.01438	1.84	4.7212	51.42
V111L	0.000776749	0.000776749	0	0	0	0	0	0	1	-3	0	0.01438	0.7	4.7212	51.42
K112E	0.00132566	0.00132566	0.00253746	0.00233145	0.0013236	0.79	0.64	0.49	1	-0.733	0.15	0.2442	-0.26	8.8476	42.15
K112I	0.0018778	0.0018778	0.00115242	0.00182777	0.00615181	0.39	0.49	0.76	1	-2.867	0.03	0.2442	-1.39	8.8476	42.15
K112N	0.00219195	0.00219195	0.000452819	0.00112883	0.00280328	0.17	0.34	0.56	1	-0.183	0.08	0.2442	-1.3	8.8476	42.15
K112Q	0	0.000313685	0	0	0	0	0	0	0.509	-0.7	0.27	0.2442	-0.26	8.8476	42.15
K112R	0.00226651	0.00226651	0.00393842	0.0081824	0.019472	0.75	0.83	0.91	0.37	-1.2	0.24	0.2442	-1.27	8.8476	42.15
K112T	0.000539418	0.000539418	0.000101703	0.00076259	0.000280331	0.15	0.59	0.34	1	-0.275	0.1	0.2442	0.33	8.8476	42.15
G113A	0.000331058	0.000331058	0	0	0	0	0	0	1	-6	0	0.02145	-0.7	9.3835	38.15
G113E	0.00143402	0.00143402	0	0	0	0	0	0	1	-8	0	0.02145	1.45	9.3835	38.15
G113R	0.00103712	0.00103712	0	0	0	0	0	0	1	-8	0	0.02145	2.88	9.3835	38.15
G113V	0.000970774	0.000970774	0	0	0	0	0	0	1	-9	0	0.02145	-0.06	9.3835	38.15
M114I	0.00504788	0.00504788	0.00536037	0.00525446	0.0118561	0.56	0.51	0.7	0.414	-2.6	0.4	0.1784	0.98	9.1758	44.79
M114K	0.00105124	0.00105124	0	0	0	0	0	0	1	-5.6	0	0.1784	2.52	9.1758	44.79
M114L	0.00149759	0.00149759	0.000772604	0.000183025	0.000539334	0.35	0.1	0.26	0.635	-2.2	0.15	0.1784	0.27	9.1758	44.79
M114R	4.89727e-05	4.89727e-05	0	0	0	0	0	0	1	-5.6	0	0.1784	3.79	9.1758	44.79
M114T	0.00133382	0.00133382	0.000494837	0.000469458	0.000142212	0.27	0.26	0.09	0.54	-5.2	0.03	0.1784	3.17	9.1758	44.79
M114V	0.00222571	0.00222571	0.000991506	0.0013004	0.000688448	0.31	0.36	0.23	1	-2.8	0.01	0.1784	1.53	9.1758	44.79
L115M	0.00140565	0.00140565	0.00249902	0.0028597	0.00705134	0.76	0.68	0.84	0.249	-0.883	0.36	0.4074	0	11.8366	41.26
L115P	0.00249454	0.00249454	0.000889443	0.000812047	0.000256003	0.26	0.24	0.09	1	-6.117	0	0.4074	2.37	11.8366	41.26
L115Q	0.00142314	0.00142314	0.000789551	0.000677991	0.00130106	0.36	0.32	0.47	0.445	-4.8	0.02	0.4074	1.5	11.8366	41.26
L115R	0.000364867	0.000364867	0.000160045	2.61071e-05	9.88969e-05	0.31	0.06	0.21	1	-5.1	0	0.4074	0.72	11.8366	41.26
L115V	0.000544162	0.000544162	0.000254282	0.000457191	8.49761e-05	0.32	0.45	0.13	0.473	-2.483	0.06	0.4074	1.8	11.8366	41.26
A116D	0.00163352	0.00163352	0.000628799	0.000685604	0.00223776	0.28	0.29	0.57	0.54	-3.363	0.27	0.327	0.93	13.5473	32.81
A116G	0.00052184	0.00052184	0.00107556	0.000509539	0.000294806	0.82	0.49	0.36	1	-2.577	0.28	0.327	0.75	13.5473	32.81
A116P	0.000398808	0.000398808	0	0	0	0	0	0	1	-3.13	0.18	0.327	-0.05	13.5473	32.81
A116S	0.000658053	0.000658053	0.00173804	0.00260918	0.000725476	0.93	0.85	0.52	0.281	-0.92	0.74	0.327	-0.54	13.5473	32.81
A116T	0.00432703	0.00432703	0.00439211	0.00680321	0.0110735	0.54	0.61	0.71	0.632	-1.951	0.79	0.327	-0.15	13.5473	32.81
A116V	0.00295171	0.00295171	0.00219928	0.00181032	0.00332629	0.45	0.38	0.52	1	-2.277	0.38	0.327	-0.04	13.5473	32.81
Q117E	0	0.000348246	0	0	0.000299412	0	0	0.46	0.435	0.068	0.95	0.8688	0.47	16.6653	25.77
Q117H	0.00152077	0.00152077	0.00117658	0.00338697	0.00389318	0.46	0.71	0.71	1	-1.731	0.11	0.8688	0.69	16.6653	25.77
Q117K	0.00041866	0.00041866	0.00024325	0.00230164	0.00232332	0.38	0.93	0.85	0.249	1.641	1	0.8688	-0.33	16.6653	25.77
Q117L	0.0017505	0.0017505	0.00154992	0.00222776	0.00933312	0.5	0.56	0.85	0.632	-3.086	0.37	0.8688	0.37	16.6653	25.77
Q117P	0.000208369	0.000208369	0.000576042	2.73282e-05	0.000211375	0.95	0.11	0.5	0.463	-0.95	0.29	0.8688	0.44	16.6653	25.77
Q117R	0.00201337	0.00201337	0.00338392	0.012746	0.0245304	0.73	0.97	0.96	0.464	-0.191	0.5	0.8688	-0.3	16.6653	25.77
R118C	0.00437292	0.00437292	0.00587162	0.00804145	0.00629951	0.64	0.66	0.59	1	-7.133	0.01	0.2986	1.56	14.3056	28.32
R118G	0.000693515	0.000693515	0.000120189	0	9.23848e-05	0.14	0	0.11	0.632	-6.167	0.3	0.2986	2.51	14.3056	28.32
R118H	0.00408783	0.00408783	0.002787	0.00211351	0.00230692	0.42	0.34	0.36	1	-4.489	0.07	0.2986	1.48	14.3056	28.32
R118L	0.00107215	0.00107215	0	2.52643e-06	0.000916046	0	0.002	0.46	1	-6.2	0.07	0.2986	1.58	14.3056	28.32
R118P	0.00105433	0.00105433	0.00118914	0.000579509	0.000559026	0.58	0.35	0.34	1	-6.011	0.06	0.2986	0.25	14.3056	28.32
R118S	0.000769241	0.000769241	0.000189081	0.00112875	0.000818494	0.19	0.6	0.51	1	-4.978	0.07	0.2986	1.32	14.3056	28.32
H119D	7.56094e-05	7.56094e-05	0	0	0	0	0	0	0.642	-8.4	0.07	0.2614	0.59	10.9276	39.13
H119L	0.00234168	0.00234168	0	0	0.000150297	0	0	0.06	1	-10.533	0.01	0.2614	-1.11	10.9276	39.13
H119N	0.000468932	0.000468932	0.000626729	0.00117253	0.000274404	0.64	0.74	0.36	0.303	-6.2	0.17	0.2614	-0.14	10.9276	39.13
H119P	5.32615e-05	5.32615e-05	0	0	0	0	0	0	1	-9.533	0.01	0.2614	1.48	10.9276	39.13
H119Q	0.000670063	0.000670063	0	0	0.000289178	0	0	0.3	1	-7.533	0.01	0.2614	1.5	10.9276	39.13
H119R	0.00185003	0.00185003	0.000748007	0.000776795	0.000153252	0.29	0.29	0.07	1	-7.533	0.01	0.2614	1.18	10.9276	39.13
H119Y	0.00108126	0.00108126	0.000682517	0.00194654	0.000839676	0.4	0.65	0.43	0.636	-5.8	0.05	0.2614	-0.28	10.9276	39.13
N120D	0.00163982	0.00163982	0.0078215	0.00236827	0.0122336	1.25	0.59	0.89	0.287	-1.412	0.59	1.036	-0.14	16.8162	25.03
N120H	0	0.000313656	0.000336238	0.000655904	0.0199434	0.56	0.69	1.13	0.453	-1.405	0.11	1.036	-0.42	16.8162	25.03
N120I	0.00314295	0.00314295	0.00712101	0.0151253	0.0380466	0.86	0.9	0.96	0.48	-3.921	0.21	1.036	-0.72	16.8162	25.03
N120K	0.00206455	0.00206455	0.00388236	0.00530937	0.0335302	0.78	0.74	0.99	0.32	-0.103	1	1.036	-1.26	16.8162	25.03
N120S	0.00213937	0.00213937	0.00577909	0.0089788	0.100069	0.94	0.87	1.1	0.355	-0.364	0.8	1.036	0.04	16.8162	25.03
N120T	0.000447227	0.000447227	0.00192508	0.0039918	0.0511919	1.19	1.06	1.19	0.303	-1.355	0.55	1.036	0.06	16.8162	25.03
N120Y	0.000303215	0.000303215	0.000376496	0.00614221	0.00400555	0.61	1.265	0.97	1	-2.975	0.03	1.036	-1.78	16.8162	25.03
K121E	0.00127921	0.00127921	0.00318316	0.00522561	0.0133191	0.9	0.86	0.94	0.249	1.757	1	1.344	-0.07	18.1404	27.59
K121M	0.00314866	0.00314866	0.00509516	0.00699131	0.00730367	0.72	0.7	0.69	1	-2.026	0.02	1.344	0.1	18.1404	27.59
K121N	0.00203661	0.00203661	0.00263266	0.00368432	0.00837888	0.63	0.65	0.8	0.32	-0.322	0.18	1.344	0.83	18.1404	27.59
K121Q	0.000172065	0.000172065	0.000227714	9.25428e-05	0.00364489	0.64	0.34	1.02	0.33	0.299	0.3	1.344	0.09	18.1404	27.59
K121R	0.00224116	0.00224116	0.00523797	0.0102718	0.0313434	0.88	0.89	0.97	0.394	-1.021	0.15	1.344	-0.3	18.1404	27.59
K121T	0.00117031	0.00117031	0.00305783	0.00872386	0.0017277	0.93	1.01	0.59	0.37	-1.051	0.14	1.344	0.65	18.1404	27.59
A122D	0.00155247	0.00155247	0.000754167	0.000355214	0.00382417	0.33	0.18	0.71	1	-5.4	0.01	0.1843	0.71	14.7952	32.67
A122G	0.000296203	0.000296203	3.84866e-05	0	7.1853e-05	0.11	0	0.19	1	-3.767	0	0.1843	1.81	14.7952	32.67
A122P	0.000323712	0.000323712	0.000598018	0.00107442	0.00326664	0.77	0.81	0.93	1	-4.7	0.02	0.1843	-0.25	14.7952	32.67
A122S	0.000369561	0.000369561	0.000246684	0.00110143	0.000933057	0.41	0.78	0.71	0.37	-2.567	0.13	0.1843	1.91	14.7952	32.67
A122T	0.00329932	0.00329932	0.00640804	0.00328605	0.00606963	0.79	0.5	0.64	0.509	-3.6	0.19	0.1843	0.79	14.7952	32.67
A122V	0.0029096	0.0029096	0.004147	0.00424161	0.00850165	0.67	0.59	0.74	0.451	-3.667	0.53	0.1843	-0.59	14.7952	32.67
V123A	0.00414991	0.00414991	0.00314798	0.00340031	0.00206837	0.45	0.45	0.33	1	-2.967	0.03	0.3669	2.03	13.7376	37.17
V123D	0.00283971	0.00283971	0	6.27532e-05	0	0	0.02	0	1	-5.6	0	0.3669	1.47	13.7376	37.17
V123F	0.000688998	0.000688998	0.00018839	0.000193809	0.00018185	0.21	0.21	0.2	0.414	-1.867	0.81	0.3669	0.95	13.7376	37.17
V123G	0.00466207	0.00466207	0.00638258	0.00661922	0.000771747	0.65	0.59	0.14	1	-5.6	0.01	0.3669	3.65	13.7376	37.17
V123I	0.00484209	0.00484209	0.00744695	0.0107868	0.0141603	0.7	0.71	0.74	0.463	-0.067	0.41	0.3669	0.18	13.7376	37.17
V123L	0.0014986	0.0014986	0.00173515	0.00191501	0.013415	0.59	0.56	0.92	0.42	-0.667	1	0.3669	0.29	13.7376	37.17
Q124E	5.64072e-05	5.64072e-05	0.0002998	0.000700297	0.0047334	1.31	1.14	1.16	0.288	-0.131	0.67	1.449	0.47	17.7693	27.28
Q124H	0.00193999	0.00193999	0.00190866	0.00374658	0.00565979	0.53	0.67	0.74	1	-2.379	0.04	1.449	0.9	17.7693	27.28
Q124K	0.000671212	0.000671212	0.000671404	0.00109541	0.00346502	0.54	0.62	0.84	0.26	-0.252	1	1.449	-0.02	17.7693	27.28
Q124L	0.00118259	0.00118259	0.00195935	0.002894	0.00421537	0.73	0.73	0.78	0.509	-4.194	0.3	1.449	0.01	17.7693	27.28
Q124P	0.000280495	0.000280495	0	0	0	0	0	0	1	-3.001	0.1	1.449	0.72	17.7693	27.28
Q124R	0.00303275	0.00303275	0.00653684	0.00572565	0.0365197	0.84	0.66	0.96	0.342	-1.36	0.38	1.449	-0.91	17.7693	27.28
E125A	0.000120124	0.000120124	0.000800275	0.000223589	0.000607648	1.455	0.66	0.84	0.299	-1.274	0.55	0.5513	1.48	18.4584	31.92
E125D	0.00256731	0.00256731	0.00604631	0.00867635	0.0241971	0.88	0.81	0.93	0.303	0.36	0.44	0.5513	0.04	18.4584	31.92
E125G	0.00122684	0.00122684	0.0048917	0.00868871	0.0612581	1.14	0.999999	1.105	0.32	0.144	0.31	0.5513	2.25	18.4584	31.92
E125K	0.00138	0.00138	0.00241542	0.00703204	0.00581585	0.75	0.92	0.81	0.48	-0.233	0.51	0.5513	1.72	18.4584	31.92
E125Q	0.000248582	0.000248582	9.44385e-07	0.000144879	0	0.002	0.36	0	0.443	-0.083	0.73	0.5513	0.9	18.4584	31.92
E125V	0.0010885	0.0010885	0.00159961	0.00193554	0.00465617	0.68	0.65	0.81	1	-2.732	0.14	0.5513	1.04	18.4584	31.92
F126C	0.000498049	0.000498049	0.000145779	0	0.000336889	0.22	0	0.4	1	-2.033	0	0.189	5.11	12.7362	45.56
F126I	0.00150772	0.00150772	0.00411698	0.00464924	0.0123719	0.95	0.79	0.91	0.249	2.528	1	0.189	2.25	12.7362	45.56
F126L	0.00211905	0.00211905	0.00338188	0.0100776	0.0185202	0.71	0.9	0.92	0.349	0.872	0.13	0.189	1.61	12.7362	45.56
F126S	0.0015816	0.0015816	0.000469067	0.000346744	0.000149618	0.23	0.17	0.08	1	-2.867	0	0.189	5.51	12.7362	45.56
F126V	0.000581778	0.000581778	0.000691873	0.000266423	0	0.6	0.31	0	0.67	1.528	0.05	0.189	3.03	12.7362	45.56
F126Y	0.00284245	0.00284245	0.000521492	0.000900954	0.00110253	0.15	0.24	0.27	1	-1.1	0	0.189	1.54	12.7362	45.56
I127F	0.000655198	0.000655198	0.000928683	0.00160965	0.00161362	0.66	0.73	0.71	0.482	-2.092	0.05	0.5937	0.66	17.9458	33.99
I127L	1.34564e-05	1.34564e-05	0	0.000652888	0.00726998	0	1.5	1.335	0.355	-0.167	0.71	0.5937	-0.17	17.9458	33.99
I127M	8.92526e-05	8.92526e-05	0.000453417	0.000253229	0.000769319	1.285	0.77	0.91	0.33	-0.53	0.11	0.5937	0.53	17.9458	33.99
I127N	0.00181235	0.00181235	0.00287458	0.00435478	0.00744847	0.71	0.72	0.8	1	-3.586	0	0.5937	2.66	17.9458	33.99
I127S	0.000114518	0.000114518	0.000471352	0.000277451	0.00270405	1.16	0.73	1.03	1	-2.853	0.01	0.5937	3.38	17.9458	33.99
I127T	0.00154454	0.00154454	0.00441696	0.0125475	0.0490758	0.97	1.03	1.06	1	-2.414	0.01	0.5937	2.36	17.9458	33.99
I127V	0.000680463	0.000680463	0.00203166	0.0051541	0.00595148	0.99	1.01	0.92	0.281	-0.372	0.43	0.5937	0.73	17.9458	33.99
Q128E	0.000736646	0.000736646	0.00146568	0.00186574	0.000105373	0.8	0.74	0.12	0.342	-0.004	1	1.2	0.23	20.7766	26.76
Q128H	0.00219086	0.00219086	0.00371245	0.00615919	0.0137869	0.74	0.77	0.87	0.365	-1.077	0.08	1.2	0.94	20.7766	26.76
Q128K	0.000407763	0.000407763	0.000892584	0.00141004	0.000528046	0.85	0.82	0.56	0.303	0.429	0.92	1.2	-0.19	20.7766	26.76
Q128L	0.0013994	0.0013994	0.00196845	0.00157538	0.00467269	0.66	0.53	0.77	0.451	-2.57	0.21	1.2	-0.19	20.7766	26.76
Q128P	0.000362915	0.000362915	0	0	0	0	0	0	1	-1.873	0.15	1.2	1.05	20.7766	26.76
Q128R	0.00279964	0.00279964	0.00497823	0.0257008	0.130498	0.76	1.06	1.1	0.365	-0.314	0.33	1.2	-0.7	20.7766	26.76
E129A	4.1988e-05	4.1988e-05	0.00106785	0	0.000406281	2.5	0	0.93	0.32	-0.224	0.77	0.8099	1.12	20.2703	33.31
E129D	0.00321189	0.00321189	0.00609407	0.00852327	0.0589805	0.78	0.75	0.999999	0.632	-1.45	0.65	0.8099	1.35	20.2703	33.31
E129G	0.00217721	0.00217721	0.00469013	0.0114487	0.00382101	0.84	0.92	0.63	1	-2.25	0.38	0.8099	2.3	20.2703	33.31
E129K	0.00115174	0.00115174	0.000563723	0.00277891	0.0102648	0.33	0.73	0.92	0.26	-0.367	0.92	0.8099	0.14	20.2703	33.31
E129Q	0	0.000326121	0	0.00075608	0	0	0.72	0	0.249	0.541	0.6	0.8099	-0.55	20.2703	33.31
E129V	0.000838013	0.000838013	0.0017727	0.00087745	0.000601626	0.83	0.51	0.41	0.645	-0.557	0.3	0.8099	0.16	20.2703	33.31
F130C	0.000565874	0.000565874	0.000323218	0.000134459	0.000701249	0.37	0.19	0.55	1	-7.967	0	0.1812	4.4	15.3704	44.88
F130I	0.00136214	0.00136214	0.000886458	0.00131624	0.00142584	0.41	0.49	0.51	1	-5.933	0.01	0.1812	2.11	15.3704	44.88
F130L	0.00340589	0.00340589	0.00170735	0.00241616	0.00835747	0.34	0.41	0.71	0.464	-5.844	0.16	0.1812	0.93	15.3704	44.88
F130S	0.00164917	0.00164917	0.000457798	0.000485236	0.00121114	0.21	0.22	0.42	1	-8	0	0.1812	5.53	15.3704	44.88
F130V	0.000487173	0.000487173	0.000193623	0	0	0.28	0	0	1	-6.933	0	0.1812	3.25	15.3704	44.88
F130Y	0.00195471	0.00195471	0.00164409	0.00216395	0.00263592	0.48	0.52	0.57	1	-3	0	0.1812	0.59	15.3704	44.88
D131A	9.24393e-05	9.24393e-05	0.000225444	0	0.00186388	0.89	0	1.01	0.33	-2.147	0.37	0.9699	0.09	22.537	31.32
D131E	0.00239376	0.00239376	0.00485552	0.00295374	0.00922596	0.81	0.55	0.79	0.249	0.979	1	0.9699	-0.11	22.537	31.32
D131G	0.00163352	0.00163352	0.0035506	0.00420288	0.00332043	0.84	0.74	0.67	0.287	-2.534	0.14	0.9699	0.58	22.537	31.32
D131H	0.000274567	0.000274567	0.000919389	0.00396218	0.00489802	1.05	1.18	0.999999	1	-1.432	0.03	0.9699	-0.72	22.537	31.32
D131N	0.00117586	0.00117586	0.00153623	0.00485001	0.00388994	0.63	0.86	0.76	0.287	-0.257	0.24	0.9699	-1.55	22.537	31.32
D131V	0.00198376	0.00198376	0.00414817	0.00763074	0.113382	0.83	0.84	1.12	1	-3.13	0.08	0.9699	-0.58	22.537	31.32
D131Y	0.000349285	0.000349285	0.000374835	0.00443942	0.00198623	0.56	1.14	0.86	1	-3.082	0.01	0.9699	-1.22	22.537	31.32
N132D	0.00182809	0.00182809	0.0048676	0.00450526	0.0164936	0.94	0.73	0.92	0.32	0.932	0.41	1.119	1.37	24.5507	28.11
N132H	0	0.000313656	0.000151596	0.000580615	0.000168585	0.33	0.66	0.34	1	-0.972	0.02	1.119	1.6	24.5507	28.11
N132I	0.00316316	0.00316316	0.00546791	0.0147507	0.0110467	0.74	0.89	0.77	0.451	-3.329	0.06	1.119	0.81	24.5507	28.11
N132K	0.00175608	0.00175608	0.00368892	0.00516975	0.0299103	0.83	0.78	0.999999	0.26	0.363	0.41	1.119	0.52	24.5507	28.11
N132S	0.00244778	0.00244778	0.00613065	0.00818072	0.0210799	0.91	0.81	0.91	0.448	-0.418	0.46	1.119	0.72	24.5507	28.11
N132T	0.000766404	0.000766404	0.00200534	0.00939737	0.00813769	0.93	1.14	0.94	1	-1.457	0.12	1.119	1.07	24.5507	28.11
N132Y	0.000401878	0.000401878	0.000506977	0.000489248	0.0008203	0.62	0.55	0.67	1	-2.617	0.01	1.119	-0.06	24.5507	28.11
A133D	0.00148823	0.00148823	0.00197745	0.00192303	0.00208605	0.64	0.56	0.58	1	-4.369	0.01	0.4761	1.51	22.0434	32.17
A133G	0.000916599	0.000916599	0.0020866	0.000841407	0.000966443	0.86	0.48	0.51	1	-3.304	0	0.4761	1.23	22.0434	32.17
A133P	0.00103093	0.00103093	0	0	0	0	0	0	1	-3.857	0.01	0.4761	0.52	22.0434	32.17
A133S	0.000413562	0.000413562	0	3.57588e-05	0.00132045	0	0.07	0.76	0.355	-1.642	0.08	0.4761	0.97	22.0434	32.17
A133T	0.0035644	0.0035644	0.00807997	0.014745	0.0279889	0.86	0.86	0.9	0.365	-2.43	0.07	0.4761	-0.97	22.0434	32.17
A133V	0.00403085	0.00403085	0.00641736	0.016657	0.0129256	0.71	0.86	0.76	0.291	-2.181	0.15	0.4761	-1.05	22.0434	32.17
G134A	0.000302034	0.000302034	2.88215e-05	0.00148277	0.000359775	0.08	0.91	0.54	1	-5.733	0	0.06975	0.97	24.7945	30.92
G134E	0.00209852	0.00209852	0.00278448	0.00576014	0.00783042	0.64	0.76	0.79	1	-7.467	0	0.06975	1.01	24.7945	30.92
G134R	0.00217257	0.00217257	0.00470434	0.00780215	0.00813646	0.84	0.83	0.79	1	-7.467	0	0.06975	0.62	24.7945	30.92
G134V	0.000716958	0.000716958	0	0	0.000128483	0	0	0.15	1	-8.6	0	0.06975	0.91	24.7945	30.92
Y135C	0.00145928	0.00145928	0.000644806	0.000703051	8.40153e-05	0.31	0.32	0.05	1	-8.967	0	0.04409	4.06	21.833	40.12
Y135D	6.12463e-05	6.12463e-05	0	0	0	0	0	0	1	-9.967	0	0.04409	5.26	21.833	40.12
Y135F	0.000862105	0.000862105	0.0017636	0.00597614	0.00689432	0.82	0.99	0.9	0.485	-4	0.02	0.04409	0.2	21.833	40.12
Y135H	0.00107968	0.00107968	0.00038094	0.000448926	0.000328284	0.26	0.29	0.23	1	-5	0	0.04409	2.29	21.833	40.12
Y135N	0.000751004	0.000751004	0	0	0	0	0	0	1	-8.933	0	0.04409	3.41	21.833	40.12
Y135S	0	0.00031701	0	0	0	0	0	0	1	-8.967	0	0.04409	6.5	21.833	40.12
D136A	6.77032e-05	6.77032e-05	0.000221084	0.000285311	0.000494066	1.04	0.87	0.89	0.595	-4.143	0.45	0.9839	0.52	22.7555	34.03
D136E	0.0020532	0.0020532	0.00259164	0.00543257	0.00388155	0.62	0.75	0.65	0.358	-1.256	0.74	0.9839	0.38	22.7555	34.03
D136G	0.0026122	0.0026122	0.00616504	0.0118408	0.0129192	0.88	0.89	0.83	1	-3.395	0.21	0.9839	1.12	22.7555	34.03
D136H	0.000161944	0.000161944	0.000555569	0.000623078	0.00358006	1.06	0.84	1.02	1	-2.763	0.07	0.9839	0.67	22.7555	34.03
D136N	0.00218811	0.00218811	0.00310533	0.00459541	0.0118563	0.66	0.69	0.85	0.249	-0.069	0.77	0.9839	0.51	22.7555	34.03
D136V	0.00158026	0.00158026	0.00348368	0.00554327	0.00692123	0.85	0.82	0.81	0.468	-4.776	0.39	0.9839	-0.25	22.7555	34.03
D136Y	0.000675554	0.000675554	0.000676203	0.000599292	0.00782311	0.54	0.47	0.95	1	-4.778	0.02	0.9839	-1.16	22.7555	34.03
V137A	0.00274233	0.00274233	0.00544187	0.00567681	0.00397836	0.8	0.69	0.59	1	-3.387	0	0.2244	1.77	19.1634	37.07
V137D	0.00173798	0.00173798	0	5.52629e-05	0	0	0.03	0	1	-6.251	0	0.2244	3.12	19.1634	37.07
V137F	0.000292102	0.000292102	0	0.000200303	5.40422e-05	0	0.4	0.15	1	-3.568	0	0.2244	-0.03	19.1634	37.07
V137G	0.000253287	0.000253287	0.000118657	0.000115279	0	0.32	0.31	0	1	-6.353	0	0.2244	2.81	19.1634	37.07
V137I	0.00236388	0.00236388	0.00263519	0.0180752	0.0107015	0.58	1.02	0.82	0.394	-0.215	0.14	0.2244	-0.42	19.1634	37.07
V137L	0.00046192	0.00046192	0.0010784	0.00123559	0.00711204	0.87	0.75	0.98	0.32	-1.022	0.19	0.2244	-1.5	19.1634	37.07
H138D	0.000126047	0.000126047	0.000138093	8.77459e-05	0.00394564	0.57	0.41	1.06	1	-1.357	0.21	0.919	1.33	18.2484	40.93
H138L	0.00345083	0.00345083	0.00263262	0.00162759	0.00537695	0.45	0.32	0.6	0.514	-1.725	0.61	0.919	-1.01	18.2484	40.93
H138N	0.00124883	0.00124883	0.000792213	0.00162759	0.0038091	0.4	0.57	0.75	0.334	-0.291	0.39	0.919	0.91	18.2484	40.93
H138P	9.21703e-05	9.21703e-05	0	0	0	0	0	0	1	-2.322	0.19	0.919	1.93	18.2484	40.93
H138Q	0.0012827	0.0012827	0.00351353	0.00290032	0.00731099	0.95	0.71	0.86	0.26	-0.986	0.37	0.919	0.25	18.2484	40.93
H138R	0.00216351	0.00216351	0.00647973	0.0143654	0.0185219	0.99	0.98	0.91	1	-1.576	0.33	0.919	-0.71	18.2484	40.93
H138Y	0.00164083	0.00164083	0.00232773	0.017356	0.0117305	0.66	1.1	0.89	0.281	0.168	1	0.919	-1.48	18.2484	40.93
I139F	0.000933626	0.000933626	0.00275552	0.00674415	0.0103815	0.99	0.999999	0.95	0.32	0.414	0.57	0.7482	3.11	16.304	38.76
I139L	0	0.000316926	0.000282393	0.0028855	0.000169745	0.5	1.06	0.34	0.334	-0.352	0.46	0.7482	0.48	16.304	38.76
I139M	0	0.000332302	0.000255685	0	0.011071	0.46	0	1.07	0.355	-0.623	0.11	0.7482	0.1	16.304	38.76
I139N	0.00222559	0.00222559	0.00291577	0.006477	0.00719857	0.63	0.77	0.76	1	-3.898	0.12	0.7482	1.86	16.304	38.76
I139S	0.000528973	0.000528973	0.000837913	0.000643361	0.00202024	0.71	0.55	0.79	1	-2.998	0.15	0.7482	3.53	16.304	38.76
I139T	0.00218659	0.00218659	0.00485475	0.00889223	0.0136085	0.85	0.86	0.87	0.37	-2.364	0.21	0.7482	2.44	16.304	38.76
I139V	0.00135778	0.00135778	0.0047586	0.0090667	0.13061	1.07	0.98	1.17	0.357	-0.493	0.25	0.7482	1.11	16.304	38.76
I140F	0.00137963	0.00137963	0.00355966	0.00291234	0.00736226	0.92	0.69	0.85	0.26	0.836	0.13	0.8696	1.61	14.7623	46.93
I140L	0.00012855	0.00012855	0	0	0.000502039	0	0	0.79	1	0.528	0.1	0.8696	1.12	14.7623	46.93
I140M	0.000853882	0.000853882	0.0025986	0.00533695	0.0600532	0.999999	0.97	1.14	0.523	1.386	0.05	0.8696	0.32	14.7623	46.93
I140N	0.00288384	0.00288384	0.00712422	0.010985	0.121196	0.9	0.84	1.09	0.299	2.361	0.21	0.8696	3.82	14.7623	46.93
I140S	0.000308666	0.000308666	0.00176975	0.00206851	0.0174912	1.36	0.98	1.12	0.381	2.229	0.29	0.8696	3.57	14.7623	46.93
I140T	0.00146725	0.00146725	0.00279183	0.00661394	0.00761593	0.78	0.88	0.84	0.349	1.782	0.31	0.8696	2.72	14.7623	46.93
I140V	0.00150133	0.00150133	0.0056089	0.00912856	0.0226202	1.105	0.96	0.98	1	0.609	0.09	0.8696	1.03	14.7623	46.93
L141F	0.000888286	0.000888286	0.000459384	0.00234502	0.00104105	0.35	0.75	0.53	1	-3.271	0	0.4726	0.18	13.6366	41.35
L141M	0.00266622	0.00266622	0.0021912	0.00380524	0.0472248	0.48	0.59	0.999999	0.32	-0.577	0.21	0.4726	-0.48	13.6366	41.35
L141S	0.00178922	0.00178922	0.00324815	0.00274982	0.00214485	0.76	0.61	0.54	1	-4.673	0	0.4726	2.42	13.6366	41.35
L141V	0.000813669	0.000813669	0.00116402	0.00148447	0.00603122	0.67	0.65	0.89	0.355	-2.104	0.14	0.4726	0.85	13.6366	41.35
L141W	0.000247063	0.000247063	0	2.08743e-05	0	0	0.07	0	1	-4.873	0	0.4726	0.93	13.6366	41.35
L142F	0.0028443	0.0028443	0.00367033	0.00602943	0.00808916	0.63	0.69	0.74	1	-3.697	0.01	0.3146	-1.01	13.5747	49.78
L142H	0.00147959	0.00147959	0.00150393	0.000222166	0.00509482	0.54	0.13	0.77	1	-6.542	0	0.3146	1.67	13.5747	49.78
L142I	0.00096843	0.00096843	0.000844983	0.000340803	0.00113074	0.49	0.26	0.53	0.464	-1.455	0.07	0.3146	-0.16	13.5747	49.78
L142P	0.00201969	0.00201969	0.00176766	0.00150344	0.00178812	0.5	0.42	0.46	1	-6.409	0	0.3146	3.59	13.5747	49.78
L142R	0.00059229	0.00059229	0.000990585	0	0.000145516	0.73	0	0.19	1	-5.673	0	0.3146	-2.88	13.5747	49.78
L142V	0.0004862	0.0004862	0.000411309	0.000269621	0.000328673	0.48	0.35	0.4	0.26	-2.172	0.44	0.3146	0.83	13.5747	49.78
N143D	0.00122028	0.00122028	0.00196301	0.000982368	0.00119532	0.71	0.44	0.49	0.33	-4.667	0.07	0.08805	2.39	15.2953	43.35
N143H	0	0.000313656	0	0	0	0	0	0	1	-4.9	0	0.08805	4.97	15.2953	43.35
N143I	0.00160626	0.00160626	0	0	0	0	0	0	1	-8.833	0	0.08805	1.76	15.2953	43.35
N143K	0.00191161	0.00191161	0	0	0	0	0	0	0.595	-5.867	0.02	0.08805	1.97	15.2953	43.35
N143S	0.00216856	0.00216856	0.00124607	0.00124826	0.000737166	0.37	0.36	0.25	1	-4.867	0	0.08805	4.13	15.2953	43.35
N143T	0.000129037	0.000129037	0	0	0	0	0	0	1	-5.867	0	0.08805	1.03	15.2953	43.35
N143Y	0.000653213	0.000653213	0	0	0.000968852	0	0	0.59	1	-7.867	0	0.08805	3.02	15.2953	43.35
A144E	0.000727431	0.000727431	0	0	0	0	0	0	1	-4.9	0	0.1316	1.73	14.6583	44.61
A144G	0.000484882	0.000484882	0.000386149	0	5.3468e-05	0.47	0	0.09	1	-3.967	0	0.1316	1.61	14.6583	44.61
A144P	0	0.000326637	0	0	0	0	0	0	1	-4.9	0	0.1316	0.17	14.6583	44.61
A144S	0.000213798	0.000213798	0.000310912	0.000140526	0.000257268	0.67	0.39	0.54	0.48	-2.967	0.09	0.1316	0.51	14.6583	44.61
A144T	0.00145508	0.00145508	5.86469e-05	9.22677e-05	0.000101071	0.03	0.05	0.06	0.464	-3.867	0.02	0.1316	-0.32	14.6583	44.61
A144V	0.00541195	0.00541195	0.000138309	0.000122429	0.000782387	0.02	0.02	0.12	0.477	-3.733	0.02	0.1316	-0.49	14.6583	44.61
N145D	0.00189335	0.00189335	0.00118247	0.0035734	0.000573519	0.4	0.66	0.23	1	-1.828	0.23	0.7685	1.98	17.1689	45.35
N145H	0.000310986	0.000310986	7.82598e-05	0.000332405	4.99447e-06	0.2	0.51	0.01	0.427	-0.689	0.54	0.7685	5.55	17.1689	45.35
N145I	0.00180678	0.00180678	0.00210622	0.00168896	0.00356599	0.59	0.48	0.66	1	-3.117	0.35	0.7685	0.61	17.1689	45.35
N145K	0.00116065	0.00116065	0.00222745	0.00283775	0.00410719	0.79	0.73	0.78	0.355	-0.489	1	0.7685	-0.28	17.1689	45.35
N145S	0.00136429	0.00136429	0.0033694	0.00259612	0.00651071	0.9	0.66	0.83	0.26	-0.278	0.93	0.7685	1.3	17.1689	45.35
N145T	0.00026289	0.00026289	0.000757111	0.00122859	2.92339e-05	0.97	0.89	0.1	0.443	-1.4	0.41	0.7685	1.51	17.1689	45.35
N145Y	0.00119595	0.00119595	0.00104928	0.00411356	0.00561752	0.5	0.82	0.83	0.33	-1.822	0.94	0.7685	-0.23	17.1689	45.35
D146A	1.61072e-05	1.61072e-05	0	0	0	0	0	0	1	-7.328	0	0.2626	0.17	19.5847	33.13
D146E	0.00336662	0.00336662	0.00370506	0.00455109	0.00556288	0.57	0.58	0.62	0.681	-3.624	0.02	0.2626	-0.77	19.5847	33.13
D146G	0.00219854	0.00219854	0.00178106	0.00164039	0.00149912	0.47	0.42	0.4	1	-6.447	0.01	0.2626	0.77	19.5847	33.13
D146H	0.000200812	0.000200812	2.84141e-06	0.000528079	9.86406e-05	0.01	0.75	0.32	0.499	-6.299	0.01	0.2626	0.89	19.5847	33.13
D146N	0.00125071	0.00125071	0.00175584	0.00184895	0.022446	0.66	0.6	0.999999	0.357	-4.456	0.13	0.2626	0.78	19.5847	33.13
D146V	0.00198467	0.00198467	0.00080157	0.000705038	0.000331327	0.29	0.26	0.14	1	-8.295	0	0.2626	0.58	19.5847	33.13
D146Y	0.000502172	0.000502172	0.00060399	0	2.37447e-05	0.6	0	0.04	0.478	-8.114	0.03	0.2626	0.23	19.5847	33.13
Y147C	0.00235229	0.00235229	0.00115159	0.000815621	0.00123593	0.33	0.25	0.34	1	-8.567	0	0.3216	3.74	18.6341	38.47
Y147D	0	0.000332887	0	0	0	0	0	0	1	-9.567	0	0.3216	5.76	18.6341	38.47
Y147F	0.00158076	0.00158076	0.00341385	0.00674782	0.0259639	0.84	0.87	0.99	0.33	-3.242	0.15	0.3216	0.47	18.6341	38.47
Y147H	0.00161934	0.00161934	0.00210433	0.00357257	0.0042494	0.63	0.7	0.72	0.5	-4.892	0.01	0.3216	2.34	18.6341	38.47
Y147N	0.000635641	0.000635641	0	0	0	0	0	0	1	-8.675	0	0.3216	3.53	18.6341	38.47
Y147S	7.14625e-05	7.14625e-05	0	0	0	0	0	0	1	-8.567	0	0.3216	4.81	18.6341	38.47
G148A	0.000972978	0.000972978	0.00170197	0.00303555	0.00174964	0.75	0.79	0.64	1	-3.756	0.02	0.5892	1.23	20.2917	32.15
G148C	0.00107089	0.00107089	0.000693063	0.000478855	0.00266923	0.41	0.3	0.71	0.637	-6.089	0.02	0.5892	0.64	20.2917	32.15
G148D	0.00464455	0.00464455	0.00529322	0.00691602	0.00996832	0.58	0.6	0.68	0.334	-3.1	0.11	0.5892	0.46	20.2917	32.15
G148R	0.000576448	0.000576448	0.000440835	0.00350926	0.000140362	0.45	0.96	0.19	0.657	-4.578	0.04	0.5892	-0.07	20.2917	32.15
G148S	0.00261295	0.00261295	0.00429232	0.0137425	0.0135984	0.72	0.92	0.84	0.435	-3.033	0.06	0.5892	1.09	20.2917	32.15
G148V	0.00114432	0.00114432	0.000120545	0.000180357	0.000123025	0.09	0.13	0.09	1	-5.989	0.02	0.5892	1.07	20.2917	32.15
V149A	0.00204379	0.00204379	0.0029339	0.00283869	0.0040239	0.67	0.58	0.66	0.445	-3.8	0.01	0.07859	2.25	16.2426	51.9
V149E	0.00114466	0.00114466	0.000625199	0.00052313	0.00638757	0.36	0.31	0.85	1	-5.85	0	0.07859	1.48	16.2426	51.9
V149G	0.000142358	0.000142358	0.000147135	0	0	0.55	0	0	1	-6.817	0	0.07859	3.43	16.2426	51.9
V149I	0.00283974	0.00283974	0.00528923	0.0124169	0.0109766	0.77	0.88	0.79	0.443	-0.862	0.11	0.07859	-0.52	16.2426	51.9
V149L	0.000992226	0.000992226	0.000714033	0.000644115	0.0040228	0.44	0.39	0.8	0.32	-2.695	0.01	0.07859	0.32	16.2426	51.9
A150D	0.00121739	0.00121739	0	0	0	0	0	0	1	-2.603	0	0.1971	2.3	18.0362	39.7
A150G	0.000299069	0.000299069	0.000203829	0.000464886	0.000823533	0.42	0.61	0.73	1	-2.302	0.01	0.1971	1.32	18.0362	39.7
A150P	0.000458777	0.000458777	0.00114426	0.000947868	0.00519029	0.91	0.69	0.95	0.263	2.359	1	0.1971	-1.8	18.0362	39.7
A150S	0.00150187	0.00150187	0.00178171	0.000377681	0.00244919	0.6	0.2	0.61	1	-1.302	0.01	0.1971	0.07	18.0362	39.7
A150T	0.00386255	0.00386255	0	2.02875e-06	0.000303345	0	0	0.07	1	-1.736	0	0.1971	0.67	18.0362	39.7
A150V	0.00350321	0.00350321	8.97174e-05	3.55691e-05	0.00068941	0.02	0.01	0.16	1	-2.302	0	0.1971	-1.33	18.0362	39.7
Q151E	0	0.000348147	0	0	0	0	0	0	0.334	-2.138	0.11	0.07558	0.56	11.5296	49.58
Q151H	0.00320621	0.00320621	0	0	0	0	0	0	1	-4.569	0	0.07558	3.63	11.5296	49.58
Q151K	0.000421706	0.000421706	0	0	0	0	0	0	1	-3.569	0	0.07558	4.03	11.5296	49.58
Q151L	0.00126012	0.00126012	0	0	0	0	0	0	1	-6.713	0	0.07558	-0.2	11.5296	49.58
Q151P	0.000121911	0.000121911	0	0	0	0	0	0	1	-5.569	0	0.07558	0.82	11.5296	49.58
Q151R	0.00162089	0.00162089	0.000637335	0.000443722	0.000110811	0.28	0.21	0.06	1	-3.713	0	0.07558	5.41	11.5296	49.58
D152A	4.82289e-06	4.82289e-06	0	0	0.000866806	0	0	1.23	0.692	-7.079	0.05	0.3574	3.42	13.0784	47.74
D152E	0.00128508	0.00128508	0.00298397	0.00325922	0.00210696	0.87	0.74	0.62	0.349	-3.131	0.36	0.3574	1.8	13.0784	47.74
D152G	0.00232848	0.00232848	0.00203276	0.00182551	0.00229809	0.49	0.44	0.49	1	-6.328	0.02	0.3574	3.49	13.0784	47.74
D152H	0.000381772	0.000381772	0.000846283	0.00271167	0.0016431	0.85	0.999999	0.81	0.525	-6.113	0.03	0.3574	2.28	13.0784	47.74
D152N	0.00121313	0.00121313	0.00235964	0.00232983	0.00170338	0.79	0.67	0.58	0.33	-4.194	0.1	0.3574	1.77	13.0784	47.74
D152V	0.00187924	0.00187924	0.00459942	0.00734129	0.0650585	0.9	0.85	1.07	1	-8.046	0.01	0.3574	2.42	13.0784	47.74
D152Y	0.00167269	0.00167269	0.000379869	0.000399007	0.000574986	0.18	0.19	0.25	1	-8.079	0	0.3574	1.42	13.0784	47.74
R153G	0.00199543	0.00199543	0.000676092	0.000903365	0.000172328	0.25	0.31	0.07	1	-7	0	0.01578	3.57	6.7965	66.58
R153I	0.00231275	0.00231275	0	0	0	0	0	0	1	-8	0	0.01578	0.51	6.7965	66.58
R153K	0.00133964	0.00133964	0	0	0	0	0	0	1	-3	0	0.01578	1.72	6.7965	66.58
R153S	0.000463344	0.000463344	0	0	0	0	0	0	1	-6	0	0.01578	2.49	6.7965	66.58
R153T	0	0.000326702	0	0	0	0	0	0	1	-6	0	0.01578	2.12	6.7965	66.58
K154E	0.00233341	0.00233341	0.00390723	0.00617451	0.00834933	0.73	0.75	0.78	0.303	-2.912	0.44	0.4565	-0.34	9.8298	50.12
K154I	0.00166133	0.00166133	0.00195142	0.00245818	0.00285237	0.59	0.6	0.63	0.482	-5.822	0.07	0.4565	-0.63	9.8298	50.12
K154N	0.00169753	0.00169753	0.0016183	0.0088941	0.01448	0.52	0.92	0.91	0.355	-3.88	0.09	0.4565	1.63	9.8298	50.12
K154Q	0.000868048	0.000868048	0.000615649	0.00374784	0.00197824	0.43	0.87	0.69	0.427	-2.855	0.1	0.4565	1.07	9.8298	50.12
K154R	0.00234994	0.00234994	0.00448976	0.00272505	0.00830584	0.79	0.54	0.78	0.381	-2.318	0.06	0.4565	-0.03	9.8298	50.12
K154T	0.000719309	0.000719309	0.000494972	0.00465681	0.0010012	0.42	0.98	0.58	1	-4.547	0.05	0.4565	1.07	9.8298	50.12
R155C	0.00263449	0.00263449	0	2.67526e-06	0	0	0.001	0	1	-8	0	0.01578	2.77	5.8574	61.9
R155G	0.000310327	0.000310327	0	0	0	0	0	0	1	-7	0	0.01578	4.35	5.8574	61.9
R155H	0.00403786	0.00403786	7.01796e-05	0.000100787	0	0.01	0.02	0	1	-5	0	0.01578	6.15	5.8574	61.9
R155L	0.00028814	0.00028814	0	0	0	0	0	0	1	-7	0	0.01578	3.3	5.8574	61.9
R155P	0.000482282	0.000482282	0	0	0	0	0	0	1	-7	0	0.01578	3.48	5.8574	61.9
R155S	0.000598767	0.000598767	0	0	0	0	0	0	1	-6	0	0.01578	1.83	5.8574	61.9
V156A	0.00182674	0.00182674	0.00177334	0.00102902	0.00250732	0.53	0.36	0.57	1	-3.933	0	0.06443	2.15	10.1888	47.38
V156D	0.00121026	0.00121026	0	0	0	0	0	0	1	-6.9	0	0.06443	3.69	10.1888	47.38
V156F	0.000361893	0.000361893	0	0	0	0	0	0	1	-4.8	0	0.06443	2.9	10.1888	47.38
V156G	0.00111977	0.00111977	0.000736751	0.000591782	0.000217689	0.41	0.34	0.16	1	-6.933	0	0.06443	3.78	10.1888	47.38
V156I	0.000803044	0.000803044	0.00132601	0.000728954	0.00209488	0.72	0.47	0.72	0.287	-0.867	0.09	0.06443	0.12	10.1888	47.38
V156L	0.00016394	0.00016394	0.000168995	0	7.73314e-05	0.55	0	0.32	0.427	-2.733	0.01	0.06443	-0.84	10.1888	47.38
F157C	0.000983001	0.000983001	0.000443387	6.20743e-05	0.000799317	0.31	0.05	0.44	1	-5.9	0	0.1874	4.22	11.8444	55.16
F157I	0.00193347	0.00193347	0.000655118	0.00396164	0.00250176	0.25	0.68	0.56	0.414	-3	0.46	0.1874	0.96	11.8444	55.16
F157L	0.003812	0.003812	0.00209499	0.00509914	0.00610875	0.36	0.57	0.61	1	-3.6	0.03	0.1874	1.45	11.8444	55.16
F157S	0.00130954	0.00130954	0.000235976	0.000188742	0.000122752	0.15	0.12	0.08	1	-6.2	0	0.1874	4.58	11.8444	55.16
F157V	0.00121624	0.00121624	0.00162303	0.000288267	0.000250808	0.64	0.19	0.17	1	-4	0.01	0.1874	1.89	11.8444	55.16
F157Y	0.00151946	0.00151946	0	0	0	0	0	0	1	-2.4	0.04	0.1874	0.86	11.8444	55.16
Y158C	0.00111646	0.00111646	0.000908335	0.00283689	0.000848281	0.47	0.74	0.43	1	-6.167	0.01	0.3722	4.06	12.0528	53.45
Y158D	0	0.000332887	0	0	0	0	0	0	1	-7.367	0.01	0.3722	4.1	12.0528	53.45
Y158F	0.00106335	0.00106335	0.0019215	0.00517314	0.0128403	0.76	0.9	0.96	0.355	-0.867	0.53	0.3722	-0.86	12.0528	53.45
Y158H	0.00106335	0.00106335	0.000327566	0.000286555	0.000127338	0.23	0.21	0.1	1	-4.133	0	0.3722	2.72	12.0528	53.45
Y158N	5.42395e-05	5.42395e-05	0	0	0	0	0	0	1	-6.833	0.01	0.3722	3.83	12.0528	53.45
Y158S	0	0.00031701	0	0	0	0	0	0	1	-6.333	0.01	0.3722	5.34	12.0528	53.45
I159F	0.00159395	0.00159395	4.85623e-06	0	0.000218347	0.002	0	0.12	1	-3.967	0	0.4239	1.46	17.0219	47.69
I159L	0.000114993	0.000114993	0	0	0.000105729	0	0	0.47	0.443	-1.933	0.03	0.4239	-0.01	17.0219	47.69
I159M	9.69572e-05	9.69572e-05	0.000576674	0.000671689	0	1.38	0.99	0	1	-2.478	0	0.4239	-0.12	17.0219	47.69
I159N	0.00326528	0.00326528	0	0	9.6056e-05	0	0	0.02	1	-6.494	0	0.4239	2.94	17.0219	47.69
I159S	0.000337437	0.000337437	0	0	0	0	0	0	1	-5.494	0	0.4239	4.62	17.0219	47.69
I159T	0.00258593	0.00258593	0.00206256	0.00154889	0.00116006	0.47	0.37	0.3	1	-4.022	0	0.4239	3.03	17.0219	47.69
I159V	0.00141359	0.00141359	0.00299333	0.00428425	0.0149243	0.83	0.78	0.94	0.263	-0.056	1	0.4239	1	17.0219	47.69
G160A	0.000713736	0.000713736	0.000661664	0.000534533	0.000312711	0.51	0.42	0.3	1	-6	0	0.02145	-0.41	18.9038	39.21
G160C	0.00024449	0.00024449	0	0.000563639	0	0	0.71	0	1	-9	0	0.02145	0.48	18.9038	39.21
G160D	0.00234045	0.00234045	0	0	0	0	0	0	1	-6.833	0	0.02145	4.12	18.9038	39.21
G160R	0.000106845	0.000106845	0	0	0	0	0	0	1	-7.933	0	0.02145	4.27	18.9038	39.21
G160S	0.00119549	0.00119549	0	0.000127051	0.000299779	0	0.09	0.2	1	-6	0	0.02145	0.62	18.9038	39.21
G160V	0.000607373	0.000607373	0	0	0	0	0	0	1	-9	0	0.02145	0.55	18.9038	39.21
F161C	0.000512825	0.000512825	0	0	4.94331e-05	0	0	0.08	1	-6.713	0	0.3519	4.79	22.1051	39.45
F161I	0.00186726	0.00186726	0	0	0.000456693	0	0	0.19	0.42	-4.853	0.36	0.3519	2.85	22.1051	39.45
F161L	0.00179046	0.00179046	0.00111319	0.000751432	0.0011007	0.39	0.29	0.38	1	-4.787	0.04	0.3519	1.72	22.1051	39.45
F161S	0.00224524	0.00224524	0.000565289	0.000495984	0.000603649	0.2	0.18	0.21	1	-6.78	0	0.3519	5.59	22.1051	39.45
F161V	0.000790011	0.000790011	1.75221e-05	0	0	0.02	0	0	0.674	-5.58	0.34	0.3519	3.03	22.1051	39.45
F161Y	0.00211295	0.00211295	0.00298676	0.00396782	0.00068141	0.66	0.66	0.24	0.463	-0.553	0.5	0.3519	-0.19	22.1051	39.45
R162G	0.00112393	0.00112393	0.00387729	0.00614426	0.0431575	1.07	0.93	1.085	1	-5.3	0.01	0.2311	3.19	24.5997	32.44
R162I	0.00113026	0.00113026	0.00099206	0.000838892	0.00340574	0.5	0.42	0.75	0.637	-6.4	0.02	0.2311	-0.18	24.5997	32.44
R162K	0.000668324	0.000668324	0.00164231	0.00271511	0.0019091	0.9	0.86	0.74	0.26	-2.067	0.08	0.2311	0.18	24.5997	32.44
R162S	0.00121642	0.00121642	0.00194536	0.00903276	0.0166639	0.71	1.01	0.97	1	-4.433	0.01	0.2311	2.07	24.5997	32.44
R162T	2.92125e-05	2.92125e-05	2.3139e-05	0.00067304	0	0.46	1.3	0	1	-4.7	0.01	0.2311	1.95	24.5997	32.44
K163E	0.00292628	0.00292628	0.00641733	0.00540923	0.0107556	0.85	0.66	0.78	0.473	-2.75	0.17	0.7397	0.34	27.1112	28.12
K163I	0.00208775	0.00208775	0.00120964	0.00611451	0.00347024	0.38	0.78	0.62	0.468	-5.634	0.08	0.7397	1.03	27.1112	28.12
K163N	0.00247922	0.00247922	0.00371121	0.0130355	0.0184803	0.69	0.92	0.89	0.361	-3.445	0.28	0.7397	1.83	27.1112	28.12
K163Q	0.0011596	0.0011596	0.000792314	0.00056604	0.00619373	0.42	0.32	0.85	0.514	-2.826	0.09	0.7397	0.87	27.1112	28.12
K163R	0.00247181	0.00247181	0.00418419	0.0104808	0.0350001	0.73	0.87	0.97	0.37	-2.149	0.07	0.7397	-0.83	27.1112	28.12
K163T	0.000538699	0.000538699	0.00143606	0.0055139	0.0143468	0.94	1.09	1.04	0.449	-4.158	0.06	0.7397	0.9	27.1112	28.12
E164A	8.25496e-05	8.25496e-05	0.000347645	0.0042838	0.00601955	1.17	1.52	1.14	0.595	-3.533	0.03	0.3398	0.63	28.582	19.21
E164D	0.00094283	0.00094283	0.0003808	0.000155681	0.000569295	0.29	0.14	0.37	0.249	2.567	1	0.3398	0.64	28.582	19.21
E164G	0.00224075	0.00224075	0.00286819	0.00753884	0.0130751	0.63	0.81	0.86	1	-2.85	0	0.3398	1.05	28.582	19.21
E164K	0.00161209	0.00161209	0.00307168	0.00822211	0.00568551	0.78	0.92	0.78	0.414	-1.667	0.1	0.3398	0.09	28.582	19.21
E164Q	0	0.000326213	0.000236648	0	0	0.44	0	0	1	-1.5	0.01	0.3398	0.36	28.582	19.21
E164V	0.00140469	0.00140469	0.00212359	0.0024902	0.00771165	0.69	0.65	0.85	1	-4.6	0	0.3398	0.29	28.582	19.21
L165F	0.00112858	0.00112858	0.000728816	0.00140478	0.00441731	0.4	0.55	0.8	0.673	-3.033	0.05	0.4649	0.4	27.3755	23.08
L165I	0.00061666	0.00061666	0.000689815	0.000599821	0.00453905	0.58	0.49	0.89	0.463	-1.5	0.22	0.4649	0.61	27.3755	23.08
L165S	0.00099635	0.00099635	0.00144546	0.00140478	0.0021072	0.67	0.59	0.67	1	-5.183	0	0.4649	1.19	27.3755	23.08
L165V	0.000426814	0.000426814	3.16737e-05	0	0.000240026	0.06	0	0.35	0.729	-2.4	0.03	0.4649	1.16	27.3755	23.08
N166D	0.00209031	0.00209031	0.00320354	0.00800889	0.00998552	0.69	0.84	0.83	0.335	-2.259	0.43	1.036	0.61	30.2247	19.92
N166H	0.000143765	0.000143765	0.000247407	0.00187671	0.0195806	0.74	1.15	1.205	0.355	-2.963	0.1	1.036	0.4	30.2247	19.92
N166I	0.00211017	0.00211017	0.00342521	0.00722344	0.00595937	0.72	0.82	0.73	1	-5.869	0.05	1.036	1.74	30.2247	19.92
N166K	0.000713162	0.000713162	0.000948081	0.0017253	0.00147924	0.64	0.73	0.67	0.355	-2.341	0.42	1.036	0.39	30.2247	19.92
N166S	0.00175926	0.00175926	0.00223691	0.00477246	0.0156767	0.62	0.76	0.92	0.358	-2.532	0.25	1.036	0.25	30.2247	19.92
N166T	0.000315908	0.000315908	0.000630988	0.00222685	0.000452843	0.8	0.999999	0.58	1	-3.641	0.16	1.036	0.99	30.2247	19.92
N166Y	0.000812475	0.000812475	0.000682132	0.0010818	0.000634394	0.48	0.57	0.43	1	-5.155	0.01	1.036	0.17	30.2247	19.92
I167K	0.00145127	0.00145127	0.0012686	0.000599729	0.00146682	0.49	0.29	0.5	0.414	-2.442	0.49	0.9736	0.55	26.5868	31.03
I167L	0.000975498	0.000975498	0.00122396	0.00131382	0.0108929	0.62	0.57	0.95	0.435	-0.9	0.81	0.9736	-0.07	26.5868	31.03
I167M	0.00126625	0.00126625	0.00275196	0.00155494	0.00243006	0.84	0.55	0.65	0.463	-1.088	0.24	0.9736	0.31	26.5868	31.03
I167R	4.13067e-06	4.13067e-06	8.82856e-05	0.000970684	0	2.3	1.97	0	0.478	-3.363	0.36	0.9736	0.55	26.5868	31.03
I167T	0.00148431	0.00148431	0.00336338	0.00283473	0.00172142	0.86	0.67	0.53	0.729	-2.709	0.39	0.9736	1.96	26.5868	31.03
I167V	0.00133894	0.00133894	0.00258714	0.00190734	0.0084455	0.79	0.59	0.87	0.26	-0.259	0.62	0.9736	0.42	26.5868	31.03
N168D	0.00166212	0.00166212	0.00242602	0.00426402	0.00501452	0.68	0.74	0.75	0.263	0.19	0.62	1.861	0	27.867	23.22
N168H	0.000627018	0.000627018	0.000571314	0.000278555	0.00479278	0.51	0.3	0.9	0.443	-1.106	0.13	1.861	-0.22	27.867	23.22
N168I	0.000525538	0.000525538	0.000902912	0.00160704	0.00239036	0.74	0.79	0.82	1	-3.267	0.1	1.861	0	27.867	23.22
N168K	0.00278977	0.00278977	0.00483517	0.0170774	0.0795646	0.74	0.96	1.05	0.281	0.526	1	1.861	-0.44	27.867	23.22
N168S	0.000917928	0.000917928	0.00376365	0.00200469	0.00225296	1.16	0.7	0.71	0.288	-0.448	0.54	1.861	0.22	27.867	23.22
N168T	0.000295516	0.000295516	0.000891672	0.00123651	0.00103629	0.999999	0.87	0.78	0.427	-1.174	0.54	1.861	-0.13	27.867	23.22
N168Y	0.00147269	0.00147269	0.00125699	0.00382119	0.00393449	0.49	0.74	0.72	0.435	-1.904	0.04	1.861	-0.02	27.867	23.22
Y169C	0.000972413	0.000972413	0.000438064	0.000200463	0	0.31	0.17	0	1	-4.431	0	0.2635	3.85	20.3095	41.43
Y169D	0	0.000332887	0	0	0	0	0	0	1	-3.195	0	0.2635	2.4	20.3095	41.43
Y169F	0.000526471	0.000526471	0.000691901	0	0.00186957	0.64	0	0.78	0.249	1.911	1	0.2635	-1.1	20.3095	41.43
Y169H	0.00121506	0.00121506	0.000680094	0.000649006	0.00165758	0.37	0.34	0.57	1	-2.922	0	0.2635	0.72	20.3095	41.43
Y169N	0.000539587	0.000539587	0	0	0	0	0	0	1	-3.681	0	0.2635	3.22	20.3095	41.43
Y169S	0	0.00031701	0	0	0	0	0	0	1	-3.555	0	0.2635	4.54	20.3095	41.43
L170F	0.000983593	0.000983593	0.00180713	0.00247054	0.00128622	0.77	0.74	0.56	1	0.633	0.03	2.442	-0.19	24.2825	20.39
L170H	0.00215901	0.00215901	0.00409946	0.00810793	0.0149649	0.78	0.84	0.88	0.657	0.319	0.09	2.442	0.02	24.2825	20.39
L170I	0.00051978	0.00051978	0.00124486	0.00150413	0.00334649	0.89	0.77	0.87	0.37	-0.12	0.21	2.442	-0.03	24.2825	20.39
L170P	0.00334713	0.00334713	0.00514986	0.00331615	0.0138988	0.7	0.49	0.81	0.69	2.071	0.18	2.442	0.79	24.2825	20.39
L170R	0.000570609	0.000570609	0.00118925	0.000755162	0.000906566	0.82	0.57	0.61	0.364	0.822	0.32	2.442	-0.58	24.2825	20.39
L170V	0	0.000348751	0.000416905	7.86755e-05	0	0.6	0.18	0	0.435	0.318	0.24	2.442	-0.11	24.2825	20.39
P171A	0.00025861	0.00025861	0.00106734	0.000308542	0.000165533	1.16	0.54	0.39	1	0.039	0.02	0.6232	2.04	22.4059	31.98
P171L	0.00176641	0.00176641	0.00134997	0.00236766	0.00270138	0.45	0.57	0.6	0.288	0.978	0.11	0.6232	0.87	22.4059	31.98
P171Q	0.00106525	0.00106525	0.00114621	0.000659529	0.00236492	0.56	0.38	0.68	1	-0.039	0.01	0.6232	1.4	22.4059	31.98
P171R	7.86664e-05	7.86664e-05	0.000219427	0.000690728	0.0077272	0.96	1.05	1.17	1	-0.317	0.01	0.6232	-0.96	22.4059	31.98
P171S	0.0010032	0.0010032	0.00230962	0.00197768	0.00262133	0.87	0.67	0.72	1	0.417	0.01	0.6232	1.74	22.4059	31.98
P171T	0.00103423	0.00103423	0.00255282	0.00113531	0.00349526	0.9	0.52	0.77	1	0.461	0.01	0.6232	1.58	22.4059	31.98
P172A	0.00112705	0.00112705	0.000555378	3.55528e-05	0.000327815	0.33	0.03	0.22	0.479	-6.55	0.03	0.2416	2.83	20.6132	39.19
P172H	0.00172257	0.00172257	1.85292e-05	0	0.00037829	0.01	0	0.18	1	-7.386	0	0.2416	1.94	20.6132	39.19
P172L	0.00233578	0.00233578	0.000386833	0.000210234	0.00190172	0.14	0.08	0.44	1	-7.827	0	0.2416	2	20.6132	39.19
P172R	0.000938373	0.000938373	0	0	0	0	0	0	1	-6.769	0	0.2416	2.19	20.6132	39.19
P172S	0.00317894	0.00317894	9.34384e-05	2.15783e-05	0.00227294	0.02	0.005	0.41	0.5	-6.362	0.02	0.2416	3.96	20.6132	39.19
P172T	0.000407712	0.000407712	0	0	2.13053e-05	0	0	0.04	0.688	-6.329	0.02	0.2416	2.5	20.6132	39.19
I173F	0.00183025	0.00183025	0.00204527	0.002596	0.00373455	0.58	0.59	0.67	0.69	-0.098	0.4	2.268	-0.26	24.2281	23.22
I173L	0.000414061	0.000414061	0.000833686	0.000903363	0.0060563	0.81	0.7	0.98	0.33	0.153	0.53	2.268	-0.04	24.2281	23.22
I173M	0.000222528	0.000222528	0.000216218	0	0.0024609	0.53	0	0.95	1	0.886	0.15	2.268	-0.47	24.2281	23.22
I173N	0.00198115	0.00198115	0.00418787	0.00890429	0.00731021	0.83	0.88	0.78	0.355	2.039	0.42	2.268	0.53	24.2281	23.22
I173S	0.000245744	0.000245744	0.000595093	0.000502297	0.00022596	0.89	0.68	0.47	0.448	1.859	0.52	2.268	0.72	24.2281	23.22
I173T	0.00307811	0.00307811	0.00665708	0.00921019	0.030575	0.84	0.78	0.93	0.334	1.311	0.52	2.268	0.51	24.2281	23.22
I173V	0.00226555	0.00226555	0.00597772	0.0352453	0.0566423	0.93	1.2	1.04	0.403	0.535	0.41	2.268	0.55	24.2281	23.22
P174A	0.000180379	0.000180379	0.00101308	0.00400936	0.000361413	1.345	1.29	0.66	0.249	-3.073	0.24	0.6538	1.7	23.6507	28.41
P174L	0.00131231	0.00131231	0.000645737	0.000405065	0.000358242	0.33	0.23	0.21	0.479	-5.367	0.11	0.6538	1.02	23.6507	28.41
P174Q	0.000866399	0.000866399	0.00146206	0.00241336	0.00121612	0.73	0.76	0.58	1	-3.129	0.07	0.6538	1.11	23.6507	28.41
P174R	8.89099e-05	8.89099e-05	0.000319209	3.80913e-05	0.00267103	1.09	0.29	1.06	1	-3.779	0.06	0.6538	1.5	23.6507	28.41
P174S	0.00217555	0.00217555	0.00349593	0.00550561	0.00457902	0.71	0.74	0.67	0.423	-2.626	0.14	0.6538	0.72	23.6507	28.41
P174T	0.0010036	0.0010036	0.000809001	5.26151e-05	0.00180363	0.47	0.04	0.64	1	-3.033	0.07	0.6538	2.23	23.6507	28.41
H175D	0.000804573	0.000804573	0.00194326	0.00187633	0.00148054	0.89	0.72	0.64	0.349	-0.501	0.67	2.931	-0.18	23.3461	33.11
H175L	0.00230302	0.00230302	0.00426793	0.00287876	0.00910401	0.77	0.55	0.8	0.32	0.469	0.78	2.931	-0.88	23.3461	33.11
H175N	0.000299543	0.000299543	0.000590607	0.000569361	0.000253178	0.8	0.66	0.45	0.364	-0.153	0.63	2.931	-0.39	23.3461	33.11
H175P	0.000416088	0.000416088	0	0	0.000106258	0	0	0.2	0.288	-1.179	0.38	2.931	0.92	23.3461	33.11
H175Q	0.00262476	0.00262476	0.00702006	0.0124002	0.03408	0.94	0.9	0.96	0.281	0.211	0.7	2.931	-0.77	23.3461	33.11
H175R	0.00251391	0.00251391	0.00493406	0.00373526	0.0143421	0.8	0.6	0.86	1	-0.542	0.68	2.931	-0.06	23.3461	33.11
H175Y	0.00389581	0.00389581	0.00808119	0.0165067	0.0315563	0.82	0.87	0.91	0.26	0.269	0.83	2.931	-1.47	23.3461	33.11
L176F	0.000267835	0.000267835	0.000482031	0.000896901	0.000199993	0.76	0.81	0.42	0.287	-0.48	0.08	3.465	-0.11	27.183	17.23
L176M	0.00175507	0.00175507	0.00310398	0.00635474	0.00682065	0.75	0.83	0.79	0.645	0.45	0.12	3.465	0.06	27.183	17.23
L176S	0.00276354	0.00276354	0.00712115	0.0177781	0.0619007	0.92	0.97	1.02	0.263	1.866	0.73	3.465	0.52	27.183	17.23
L176V	0.000849609	0.000849609	0.00331967	0.0138797	0.0242198	1.13	1.21	1.05	0.443	0.399	0.29	3.465	0.35	27.183	17.23
L176W	0.000508029	0.000508029	0.000906666	0.000842504	0.000959632	0.76	0.63	0.65	1	-1.147	0.02	3.465	0.05	27.183	17.23
I177K	0.00157655	0.00157655	0.00251103	0.00713551	0.00743264	0.71	0.89	0.83	0.287	2.682	1	1.477	-0.17	24.8678	24.42
I177L	0.00118686	0.00118686	0.00135089	0.00274525	0.004936	0.58	0.71	0.81	0.427	0.244	0.26	1.477	0.04	24.8678	24.42
I177M	0.00159769	0.00159769	0.00306791	0.00628674	0.00289964	0.79	0.85	0.64	1	0.807	0.09	1.477	-0.35	24.8678	24.42
I177R	0	0.000333023	0.000204	0.000646842	0	0.39	0.67	0	0.464	1.736	0.44	1.477	-0.36	24.8678	24.42
I177T	0.00129641	0.00129641	0.0033596	0.0023566	0.00909682	0.92	0.65	0.89	0.299	1.168	0.41	1.477	0.29	24.8678	24.42
I177V	0.00186725	0.00186725	0.00314083	0.00218447	0.00472611	0.73	0.54	0.71	1	0.379	0.23	1.477	0.29	24.8678	24.42
K178E	0.0020667	0.0020667	0.00151372	0.00085731	0.000925477	0.44	0.29	0.3	1	-2.634	0.25	0.9292	1.66	23.0773	34.25
K178M	0.00159444	0.00159444	0.00233508	0.00218609	0.00190931	0.68	0.58	0.54	0.499	-4.468	0.21	0.9292	0.82	23.0773	34.25
K178N	0.00242278	0.00242278	0.0019104	0.000535329	0.00136918	0.46	0.18	0.36	0.493	-3.317	0.29	0.9292	-0.28	23.0773	34.25
K178Q	0.0010907	0.0010907	0.00272276	0.00232152	0.0011644	0.91	0.69	0.51	0.485	-2.702	0.27	0.9292	0.92	23.0773	34.25
K178R	0.002455	0.002455	0.00653118	0.0108951	0.0152727	0.94	0.88	0.87	0.287	-1.533	0.35	0.9292	0.47	23.0773	34.25
K178T	0.00174661	0.00174661	0.00283447	0.00159069	0.00143659	0.72	0.47	0.45	0.449	-3.831	0.37	0.9292	1.25	23.0773	34.25
P179A	0.00063205	0.00063205	0.00044793	0.000686814	0.000147821	0.43	0.52	0.18	1	-2.027	0.17	0.9255	2.82	21.786	39.33
P179L	0.00171324	0.00171324	0.0025623	0.00269655	0.0086921	0.69	0.61	0.84	0.26	-1.357	0.56	0.9255	1.7	21.786	39.33
P179Q	0.000328287	0.000328287	0.000415699	2.37435e-05	0.000118495	0.62	0.06	0.26	1	-2.073	0.07	0.9255	2.45	21.786	39.33
P179R	0.000204722	0.000204722	0.000267435	1.31344e-05	5.553e-05	0.63	0.06	0.21	0.287	-1.929	0.17	0.9255	1.43	21.786	39.33
P179S	0.00410731	0.00410731	0.00343899	0.00398625	0.00681522	0.48	0.49	0.62	1	-2.272	0.1	0.9255	2.77	21.786	39.33
P179T	0.000472446	0.000472446	0.000273881	0.000145748	5.63926e-05	0.38	0.23	0.1	1	-2.022	0.13	0.9255	4.22	21.786	39.33
T180A	0.00210239	0.00210239	0.00519505	0.00421975	0.00925392	0.9	0.68	0.82	1	-3.315	0.01	0.248	1.29	23.0793	38.99
T180I	0.00303345	0.00303345	0.00458872	0.00461216	0.00327048	0.69	0.61	0.51	1	-3.345	0	0.248	1.34	23.0793	38.99
T180K	0.00029172	0.00029172	0.000293866	0.000372968	0.000644965	0.54	0.56	0.68	1	-3.926	0	0.248	0.21	23.0793	38.99
T180P	0.000430607	0.000430607	0.00264972	0	0.00317284	1.405	0	0.89	0.433	-4.469	0.01	0.248	2.15	23.0793	38.99
T180R	0.000595213	0.000595213	0.000919146	0.00153368	0.000388881	0.7	0.74	0.39	1	-4.164	0	0.248	1.68	23.0793	38.99
T180S	0.001624	0.001624	0.00258656	0.00133338	0.00639916	0.71	0.45	0.8	0.379	-3.019	0.07	0.248	0.77	23.0793	38.99
L181F	0.000607131	0.000607131	0.0009494	0.00435926	0.00567246	0.7	0.999999	0.92	0.249	-3.6	0.04	0.1427	0	19.2075	52.58
L181M	0.00263548	0.00263548	0.00497708	0.0109566	0.00792676	0.78	0.86	0.75	0.355	-1.767	0.03	0.1427	-0.27	19.2075	52.58
L181S	0.00160259	0.00160259	0.000764363	0.000957644	0.000532916	0.33	0.37	0.24	1	-5.733	0	0.1427	5.15	19.2075	52.58
L181V	0.000258771	0.000258771	1.50168e-05	0	0	0.05	0	0	1	-2.867	0	0.1427	1.65	19.2075	52.58
L181W	0.000274581	0.000274581	0	0	0	0	0	0	1	-5.667	0	0.1427	2.18	19.2075	52.58
K182E	0.00267072	0.00267072	0.00514234	0.00471048	0.00657976	0.79	0.64	0.71	0.42	-2.531	0.14	0.7995	0.99	25.2482	30.64
K182M	0.00166977	0.00166977	0.00250667	0.00776814	0.00815231	0.69	0.89	0.83	1	-4.631	0	0.7995	-0.05	25.2482	30.64
K182N	0.0027153	0.0027153	0.00210922	0.00178906	0.00138183	0.46	0.39	0.33	1	-3.614	0.01	0.7995	1.57	25.2482	30.64
K182Q	1.767e-05	1.767e-05	0.000725149	0.0011079	0.00229635	2.8	1.57	1.2	0.33	-2.397	0.12	0.7995	0.79	25.2482	30.64
K182R	0.00222944	0.00222944	0.003794	0.00755118	0.0192631	0.74	0.81	0.91	0.287	-0.978	1	0.7995	0.09	25.2482	30.64
K182T	0.000776452	0.000776452	0.000834969	0.000431783	0.000379019	0.56	0.35	0.32	1	-4.564	0.01	0.7995	1.75	25.2482	30.64
D183A	0.000139738	0.000139738	0	0.000337965	0	0	0.73	0	1	-7.111	0.01	0.3732	2.04	24.6382	31.57
D183E	0.00118575	0.00118575	0.00113959	0.00190668	0.000996606	0.53	0.62	0.45	0.334	-3.172	0.4	0.3732	0.8	24.6382	31.57
D183G	0.0021965	0.0021965	0.00163787	0.00141923	0.00158883	0.45	0.39	0.41	1	-6.283	0	0.3732	2.71	24.6382	31.57
D183H	8.54694e-05	8.54694e-05	0	0	0.000360298	0	0	0.81	0.445	-5.906	0.02	0.3732	2.23	24.6382	31.57
D183N	0.000997175	0.000997175	0.00154448	0.0010804	0.00216745	0.7	0.52	0.68	0.423	-4.089	0.06	0.3732	0.9	24.6382	31.57
D183V	0.000747541	0.000747541	0	0	0	0	0	0	1	-8.1	0	0.3732	2.07	24.6382	31.57
D183Y	0.000622725	0.000622725	0	1.40822e-05	6.87256e-05	0	0.02	0.09	1	-7.978	0	0.3732	1.38	24.6382	31.57
V184A	0.00206281	0.00206281	0.00405878	0.014122	0.0155982	0.8	0.99	0.9	0.263	-0.027	1	0.4506	1.42	21.4183	40.81
V184D	0.00109407	0.00109407	0.00026204	0	0.000313473	0.19	0	0.22	1	-3.529	0	0.4506	2.29	21.4183	40.81
V184F	0.000588174	0.000588174	0	0.000312922	0.000326217	0	0.34	0.35	1	-2.731	0	0.4506	-0.27	21.4183	40.81
V184G	0.000265262	0.000265262	0	0	0	0	0	0	1	-3.111	0	0.4506	1.98	21.4183	40.81
V184I	0.00316071	0.00316071	0.00513889	0.0103327	0.010128	0.72	0.8	0.76	0.249	-0.521	0.2	0.4506	-0.01	21.4183	40.81
V184L	0.000803449	0.000803449	0.000431147	0.000136448	0.000745178	0.36	0.14	0.48	1	-1.361	0.02	0.4506	0.15	21.4183	40.81
I185F	0.00180495	0.00180495	0.00068823	0	0.00142921	0.28	0	0.44	1	-3.859	0	0.09376	2.94	20.5865	46.59
I185L	2.39785e-05	2.39785e-05	0.000267777	0	8.72281e-05	1.82	0	0.78	0.355	-1.726	0.15	0.09376	0.81	20.5865	46.59
I185M	0.000741764	0.000741764	0.000998314	0.00161612	0.00545036	0.64	0.7	0.89	0.373	-2.782	0.01	0.09376	1.61	20.5865	46.59
I185N	0.000795733	0.000795733	0	0	0	0	0	0	1	-6.856	0	0.09376	2.71	20.5865	46.59
I185S	0.000930655	0.000930655	0	0	0	0	0	0	1	-5.856	0	0.09376	4.36	20.5865	46.59
I185T	0.00163225	0.00163225	0.000677718	0.000883689	0.000326156	0.29	0.35	0.16	1	-4.859	0	0.09376	3.53	20.5865	46.59
I185V	0.00186432	0.00186432	0.00190754	0.00218363	0.000845331	0.55	0.54	0.31	1	-0.997	0	0.09376	0.69	20.5865	46.59
W186C	0.00174305	0.00174305	0	8.52954e-05	0.000614575	0	0.04	0.26	1	-7.731	0.17	1.296	1.42	26.3265	32.73
W186G	0.000597941	0.000597941	0.000326974	0	0.000491196	0.36	0	0.45	0.473	-7.903	0.39	1.296	1.34	26.3265	32.73
W186L	0.000475758	0.000475758	0.000123134	0.000138251	0.000413108	0.2	0.22	0.46	0.287	-7.15	0.64	1.296	0	26.3265	32.73
W186R	0.00546696	0.00546696	0.00140306	0.000951838	0.00180778	0.2	0.14	0.24	1	-8.176	0.34	1.296	-0.68	26.3265	32.73
W186S	0.000141085	0.000141085	0	0	0.000131211	0	0	0.48	0.42	-7.815	0.41	1.296	1.19	26.3265	32.73
D187A	8.65722e-05	8.65722e-05	0	0	0	0	0	0	1	-7.654	0	0.1465	1.58	26.508	34.15
D187E	0.00253393	0.00253393	0.00297867	0.00192995	0.00915312	0.59	0.43	0.78	0.463	-3.659	0.01	0.1465	0.95	26.508	34.15
D187G	0.00276495	0.00276495	0.00166009	0.000912428	0.00360903	0.38	0.24	0.56	0.636	-6.685	0.04	0.1465	1.56	26.508	34.15
D187H	0.00022949	0.00022949	4.16666e-05	0	0	0.15	0	0	0.634	-6.582	0.02	0.1465	1.86	26.508	34.15
D187N	0.00169043	0.00169043	0.00163039	0.00174981	0.00262403	0.53	0.51	0.6	0.364	-4.541	0.08	0.1465	0.12	26.508	34.15
D187V	0.00353777	0.00353777	6.14637e-05	0	0.00295287	0.01	0	0.45	1	-8.621	0	0.1465	2.23	26.508	34.15
D187Y	0.000721762	0.000721762	0.000110957	0	0.000104949	0.13	0	0.12	1	-8.585	0	0.1465	1.24	26.508	34.15
L188F	0.00167565	0.00167565	5.01385e-05	0	0.000511694	0.02	0	0.23	1	-3.933	0	0.1369	2.23	22.7443	42.03
L188H	0.00213857	0.00213857	0	0	0	0	0	0	1	-6.9	0	0.1369	2.54	22.7443	42.03
L188I	0.00132577	0.00132577	0.00124102	0.00395646	0.00282981	0.52	0.78	0.68	0.358	-1.867	0.12	0.1369	1.4	22.7443	42.03
L188P	0.00175639	0.00175639	0.000701478	0.000811365	0.000234422	0.29	0.31	0.11	1	-6.9	0	0.1369	4.37	22.7443	42.03
L188R	0.0006906	0.0006906	0	0	0	0	0	0	1	-5.967	0	0.1369	3.27	22.7443	42.03
L188V	9.84923e-05	9.84923e-05	0	0	0	0	0	0	0.635	-2.867	0.02	0.1369	1.24	22.7443	42.03
K189E	0.000977366	0.000977366	0.000446437	0.000557461	0.000558641	0.32	0.36	0.36	0.355	-1.748	0.91	0.9364	0.96	27.3511	34.6
K189M	0.00217407	0.00217407	0.00116006	0.00308342	0.00478431	0.35	0.59	0.68	0.509	-3.765	0.12	0.9364	-0.34	27.3511	34.6
K189N	0.00330706	0.00330706	0.00200762	0.00066076	0.00490162	0.39	0.16	0.59	0.287	-2.708	0.41	0.9364	0.51	27.3511	34.6
K189Q	6.831e-07	6.831e-07	0	0	0	0	0	0	0.334	-1.45	0.68	0.9364	0.74	27.3511	34.6
K189R	0.00124032	0.00124032	0.00241939	0.0120356	0.0202323	0.79	1.08	0.99	0.33	-0.735	0.57	0.9364	0.06	27.3511	34.6
K189T	0.0010525	0.0010525	0.000567707	0.00231798	0.00165758	0.36	0.7	0.61	0.637	-3.625	0.46	0.9364	0.35	27.3511	34.6
D190A	0	0.000314229	0.000261704	0	0	0.48	0	0	0.514	-4.223	0.33	1.238	0.42	29.7316	23.17
D190E	0.00135595	0.00135595	0.00359441	0.00393644	0.0143157	0.93	0.77	0.94	0.26	-0.954	1	1.238	0.33	29.7316	23.17
D190G	0.00210247	0.00210247	0.00382268	0.00364483	0.0147984	0.76	0.64	0.89	0.445	-4.203	0.14	1.238	0.36	29.7316	23.17
D190H	0	0.00032609	0.000111047	0	0	0.25	0	0	0.449	-3.55	0.06	1.238	1.05	29.7316	23.17
D190N	0.000893145	0.000893145	0.00168153	0.00209136	0.0107043	0.78	0.72	0.95	0.287	-2.579	0.27	1.238	0.25	29.7316	23.17
D190V	0.00136707	0.00136707	0.00164044	0.00127485	0.0012077	0.6	0.48	0.46	1	-4.846	0.08	1.238	1.19	29.7316	23.17
D190Y	0.000637117	0.000637117	0.00072737	0.000230363	0.000612829	0.58	0.26	0.49	0.381	-4.89	0.08	1.238	0.3	29.7316	23.17
N191D	0.00189216	0.00189216	0.00264068	0.00222997	0.00299483	0.66	0.54	0.61	0.724	-1.744	0.32	0.7838	0.12	27.3624	24.51
N191H	0	0.000313656	0	0	0.000152162	0	0	0.32	0.688	-2.3	0.09	0.7838	-0.22	27.3624	24.51
N191I	0.00231839	0.00231839	0.00427231	0.0129305	0.0161368	0.77	0.94	0.88	1	-2.333	0.06	0.7838	-0.73	27.3624	24.51
N191K	0.0022289	0.0022289	0.00202259	0.00115514	0.0065283	0.51	0.34	0.74	0.443	-1.617	0.37	0.7838	-1.29	27.3624	24.51
N191S	0.00176485	0.00176485	0.0054781	0.00923816	0.0922816	1.01	0.92	1.105	0.263	0.383	0.98	0.7838	1.45	27.3624	24.51
N191T	0.000536003	0.000536003	0.00129145	0.00320979	0.00686785	0.89	0.96	0.96	0.26	1.107	1	0.7838	1.38	27.3624	24.51
N191Y	0.000696529	0.000696529	0.000699762	0.00174283	0.0042093	0.54	0.74	0.86	1	-2.9	0.01	0.7838	-0.1	27.3624	24.51
P192A	0.000674456	0.000674456	0.00248909	0.00744275	0.0394283	1.105	1.105	1.12	0.249	4.109	1	0.2858	0.16	26.2232	36.84
P192L	0.00171633	0.00171633	0.000169456	0	0.000423008	0.08	0	0.19	1	0.047	0.22	0.2858	2.13	26.2232	36.84
P192Q	0.000809618	0.000809618	0.000410805	0.00183787	0.00127634	0.34	0.71	0.61	1	-0.2	0.03	0.2858	3.58	26.2232	36.84
P192R	0.000635034	0.000635034	0	0	0	0	0	0	1	-0.297	0.03	0.2858	5.06	26.2232	36.84
P192S	0.00164312	0.00164312	0.00447352	0.00254068	0.011852	0.95	0.61	0.89	1	1.462	0.05	0.2858	-0.24	26.2232	36.84
P192T	0.000809618	0.000809618	0.000209681	5.74252e-05	0.000165688	0.2	0.06	0.16	0.729	0.975	0.25	0.2858	-0.1	26.2232	36.84
I193F	0.00177472	0.00177472	0.00205288	0.00357599	0.00287369	0.59	0.68	0.61	1	-3.178	0.22	0.7667	0.16	24.8334	31.11
I193L	0.000292896	0.000292896	0.000552012	0.00580677	0.0113899	0.78	1.26	1.085	0.249	-0.756	0.74	0.7667	-0.15	24.8334	31.11
I193M	0.000130185	0.000130185	6.07351e-05	0	0.000576079	0.32	0	0.82	1	-1.523	0.1	0.7667	0.2	24.8334	31.11
I193N	0.00247205	0.00247205	0.000308627	0.000148814	0.00177326	0.11	0.05	0.41	1	-5.518	0.16	0.7667	0.92	24.8334	31.11
I193S	0.000217352	0.000217352	0	0	0.000437233	0	0	0.66	1	-4.518	0.22	0.7667	1.34	24.8334	31.11
I193T	0.00196068	0.00196068	0.00331037	0.00544536	0.00340914	0.73	0.76	0.63	1	-3.524	0.26	0.7667	0.49	24.8334	31.11
I193V	0.00164688	0.00164688	0.00483378	0.0066106	0.060074	0.98	0.86	1.08	0.32	-0.38	1	0.7667	0.11	24.8334	31.11
P194A	0.000181135	0.000181135	0.000401166	0.00394607	0.000103085	0.85	1.285	0.36	0.357	-5.913	0.1	0.6185	1.47	25.3532	29.05
P194L	0.00149656	0.00149656	0.000182672	0.000280061	0.000796856	0.1	0.15	0.34	1	-8	0.02	0.6185	0.41	25.3532	29.05
P194Q	0.000911282	0.000911282	0.000437581	0.00111324	0.000941492	0.33	0.55	0.5	1	-6.247	0.01	0.6185	0.66	25.3532	29.05
P194R	0.0003318	0.0003318	0.000105289	0.000460028	0.00130351	0.24	0.58	0.8	1	-7.073	0.01	0.6185	0.38	25.3532	29.05
P194S	0.00186743	0.00186743	0.00347373	0.00224637	0.00346504	0.77	0.54	0.64	0.303	-5.733	0.12	0.6185	1.15	25.3532	29.05
P194T	0.000772206	0.000772206	0.000237296	0.0032062	0.000498432	0.23	0.86	0.39	1	-6.107	0.01	0.6185	2.85	25.3532	29.05
A195D	0.000734242	0.000734242	0	0	1.04518e-05	0	0	0.01	1	-5.228	0.02	0.3508	0.64	22.7675	32.27
A195G	0.000800374	0.000800374	0.00155049	0.00236507	0.00434988	0.79	0.78	0.85	0.303	-3.113	0.08	0.3508	1.47	22.7675	32.27
A195P	0.000433638	0.000433638	0.00029508	0.000496741	0.00017553	0.42	0.53	0.28	0.464	-4.541	0.05	0.3508	-0.01	22.7675	32.27
A195S	0.00114306	0.00114306	0.00111484	0.00183644	0.00238187	0.53	0.62	0.67	0.287	-2.359	0.09	0.3508	0.57	22.7675	32.27
A195T	0.00223726	0.00223726	0.000103021	5.50037e-05	0.000261891	0.04	0.02	0.1	0.364	-3.556	0.08	0.3508	1.7	22.7675	32.27
A195V	0.0022072	0.0022072	0	0	3.41436e-05	0	0	0.01	1	-3.785	0.06	0.3508	-0.05	22.7675	32.27
L196F	0.000952284	0.000952284	0.00148343	0.000141941	0.000715054	0.7	0.12	0.42	0.499	-2.512	0.26	2.17	1.03	24.8215	29.89
L196I	0.00173249	0.00173249	0.0017254	0.00290304	0.00338139	0.54	0.63	0.66	0.443	-1.193	0.29	2.17	0.14	24.8215	29.89
L196S	0.00109816	0.00109816	0.00211336	0.00602703	0.00702792	0.79	0.93	0.87	0.364	-2.466	0.8	2.17	-0.21	24.8215	29.89
L196V	0.000679374	0.000679374	0.000529549	5.5164e-05	0.0010627	0.46	0.07	0.61	0.463	-1.313	0.43	2.17	0.43	24.8215	29.89
D197A	0	0.000314229	2.7759e-06	0.000335635	0	0.0075	0.51	0	0.358	-2.772	0.37	1.476	1.2	25.4334	19.48
D197E	0.00149369	0.00149369	0.00250337	0.00265687	0.00499883	0.73	0.65	0.77	0.249	0.612	1	1.476	0.6	25.4334	19.48
D197G	0.00186521	0.00186521	0.00405468	0.00492514	0.014653	0.84	0.75	0.9	0.463	-3.156	0.17	1.476	1.73	25.4334	19.48
D197H	0.000174169	0.000174169	0.000428482	0	0.0018107	0.9	0	0.94	1	-2.363	0.05	1.476	1.53	25.4334	19.48
D197N	0.000776281	0.000776281	0.00232621	0.00248917	0.0021209	0.99	0.8	0.73	0.287	-1.314	0.37	1.476	1.61	25.4334	19.48
D197V	0.000917201	0.000917201	0.00185434	0.00100641	0.00428069	0.81	0.52	0.82	0.514	-3.922	0.14	1.476	1.37	25.4334	19.48
D197Y	0.000667389	0.000667389	0.000895221	0.00056511	0.00087243	0.64	0.45	0.56	1	-4.008	0.01	1.476	1.45	25.4334	19.48
K198E	0.00114881	0.00114881	0.00156344	0.00291507	0.00521415	0.65	0.74	0.82	0.649	-2.743	0.18	1.014	1.11	22.0546	27.78
K198I	0.00210134	0.00210134	0.00144428	0.00103484	0.00221767	0.42	0.33	0.51	1	-6.001	0.02	1.014	1.63	22.0546	27.78
K198N	0.00266804	0.00266804	0.00438893	0.0066095	0.0128557	0.72	0.73	0.83	0.33	-2.759	0.17	1.014	-0.48	22.0546	27.78
K198Q	0.000202891	0.000202891	0	0	0	0	0	0	0.263	-2.628	0.12	1.014	0.16	22.0546	27.78
K198R	0.00173091	0.00173091	0.00311798	0.013456	0.0169231	0.76	1.02	0.93	0.287	-1.833	0.15	1.014	-0.59	22.0546	27.78
K198T	0.000480712	0.000480712	0.00130345	0.000421083	0.000510124	0.95	0.46	0.51	0.435	-3.814	0.13	1.014	1.63	22.0546	27.78
N199D	0.00153315	0.00153315	0.00159729	0.000937737	0.00394084	0.55	0.37	0.72	0.657	-4.277	0.06	0.2827	1.17	20.1085	32.67
N199H	0.000224849	0.000224849	0.000122375	0.000186732	0	0.36	0.45	0	1	-4.393	0.01	0.2827	2.29	20.1085	32.67
N199I	0.00107661	0.00107661	0	0	0	0	0	0	1	-7.946	0	0.2827	3.11	20.1085	32.67
N199K	0.000729076	0.000729076	0	0	0	0	0	0	1	-4.871	0.01	0.2827	1.94	20.1085	32.67
N199S	0.00121289	0.00121289	0.000578361	0.000757919	0.000845897	0.33	0.38	0.41	0.358	-3.86	0.12	0.2827	2.76	20.1085	32.67
N199T	0.000286176	0.000286176	0.000116745	0	0	0.29	0	0	1	-5.06	0.01	0.2827	2.28	20.1085	32.67
N199Y	0.00101528	0.00101528	9.78542e-06	0.00028193	0.000275735	0.0075	0.21	0.21	1	-7.048	0	0.2827	0.72	20.1085	32.67
K200E	0.000978249	0.000978249	0.00103583	0.000687135	0.000419484	0.56	0.41	0.3	1	-2.921	0.11	1.206	2.33	22.1464	30.64
K200I	0.00231015	0.00231015	0.00313893	0.00211769	0.00472914	0.65	0.47	0.67	1	-6.03	0.13	1.206	0.76	22.1464	30.64
K200N	0.000577513	0.000577513	0.000987902	0.000841972	0.00460054	0.74	0.59	0.9	0.42	-3.436	0.14	1.206	1.23	22.1464	30.64
K200Q	2.30497e-05	2.30497e-05	4.57988e-05	0	0	0.8	0	0	0.357	-2.734	0.17	1.206	1.05	22.1464	30.64
K200R	0.00152984	0.00152984	0.00253553	0.00650073	0.0180952	0.73	0.87	0.95	0.299	-2.09	0.26	1.206	0.03	22.1464	30.64
K200T	0.00110606	0.00110606	0.000883521	0.000953284	0.000446849	0.47	0.46	0.28	0.657	-4.513	0.17	1.206	2.08	22.1464	30.64
T201A	0.00197211	0.00197211	0.00379733	0.0031622	0.00292385	0.79	0.62	0.59	0.26	-2.972	0.39	0.5609	0.66	21.3973	32.12
T201I	0.000961601	0.000961601	0	0	0	0	0	0	0.54	-4.557	0.34	0.5609	0.92	21.3973	32.12
T201K	7.99524e-05	7.99524e-05	0	0	0	0	0	0	0.291	-3.738	0.27	0.5609	0.79	21.3973	32.12
T201P	0.000615724	0.000615724	7.15277e-05	0	8.54426e-05	0.1	0	0.12	0.443	-3.688	0.24	0.5609	1.21	21.3973	32.12
T201R	0.00039192	0.00039192	0	0	0.000379288	0	0	0.49	0.37	-3.884	0.26	0.5609	0.84	21.3973	32.12
T201S	0.00123966	0.00123966	0.00147175	0.00552108	0.00544127	0.6	0.88	0.81	0.355	-2.161	0.37	0.5609	-0.98	21.3973	32.12
N202D	0.00185672	0.00185672	0.00045184	0.000525877	0.00040253	0.19	0.22	0.17	0.493	-4.388	0.08	0.205	5.34	23.9534	30.59
N202H	0.000883887	0.000883887	0.000751179	0.00120146	0.000668151	0.49	0.58	0.43	1	-4.109	0.01	0.205	3.93	23.9534	30.59
N202I	0.00104036	0.00104036	0	0	7.47596e-05	0	0	0.06	0.435	-7.496	0.05	0.205	1.33	23.9534	30.59
N202K	0.00240726	0.00240726	0.000458492	0	0.00285442	0.16	0	0.54	1	-5.005	0.03	0.205	1.65	23.9534	30.59
N202S	0.00187032	0.00187032	0.00160263	0.00200215	0.00277269	0.49	0.51	0.59	1	-4.388	0.01	0.205	1.86	23.9534	30.59
N202T	0.000598161	0.000598161	0	0.000275662	0	0	0.31	0	1	-5.238	0.01	0.205	2.86	23.9534	30.59
N202Y	0.00161861	0.00161861	3.94166e-05	0	0.000386354	0.02	0	0.19	1	-6.429	0	0.205	1.84	23.9534	30.59
G203A	0.000627255	0.000627255	0.00052055	0.00116894	0.00135947	0.48	0.66	0.68	0.309	-3.496	0.39	0.8242	0.82	24.4905	24.39
G203C	0.000737132	0.000737132	0.000517959	0	7.15502e-05	0.43	0	0.08	1	-6.193	0.02	0.8242	1.04	24.4905	24.39
G203D	0.00188398	0.00188398	0.001935	0.00137877	0.00388847	0.55	0.42	0.67	1	-4.191	0.28	0.8242	0.74	24.4905	24.39
G203R	0.000242684	0.000242684	3.31305e-06	0	0	0.01	0	0	0.485	-4.946	0.27	0.8242	-0.68	24.4905	24.39
G203S	0.00136206	0.00136206	0.0017799	0.00272951	0.00270447	0.63	0.68	0.66	0.423	-3.472	0.34	0.8242	0.01	24.4905	24.39
G203V	0.000606653	0.000606653	0.000313511	0	0	0.35	0	0	1	-5.803	0.13	0.8242	1.16	24.4905	24.39
N204D	0.00134206	0.00134206	0.00228524	0.00354874	0.031006	0.74	0.75	1.03	0.263	1.429	0.99	1.973	-1.27	26.7342	16.45
N204H	0	0.000313656	0	0	0	0	0	0	0.427	-1.603	0.08	1.973	-0.07	26.7342	16.45
N204I	0.00169197	0.00169197	0.00342381	0.00742359	0.00331932	0.81	0.88	0.66	1	-3.519	0.06	1.973	-0.02	26.7342	16.45
N204K	0.000514382	0.000514382	0.00065256	0.000580216	0.00527383	0.62	0.53	0.94	0.342	-1.631	0.54	1.973	-0.24	26.7342	16.45
N204S	0.00201496	0.00201496	0.00350258	0.00486225	0.0196146	0.75	0.73	0.93	0.299	-0.776	0.46	1.973	-0.7	26.7342	16.45
N204T	0.000433634	0.000433634	0.000315999	0.00278691	0.00152223	0.44	0.97	0.78	0.287	-1.868	0.26	1.973	-0.96	26.7342	16.45
N204Y	0.000514382	0.000514382	0.000358965	0.000961133	2.50875e-05	0.43	0.66	0.04	0.514	-3.381	0.07	1.973	-0.12	26.7342	16.45
K205E	0.000978767	0.000978767	0.00259305	0.00409533	0.00575537	0.93	0.87	0.86	0.482	-0.294	0.9	1.237	-0.06	28.0556	22.37
K205I	0.00167134	0.00167134	0.00178865	0.00262142	0.0017134	0.56	0.61	0.5	1	-1.42	0.45	1.237	-0.63	28.0556	22.37
K205N	0.00170448	0.00170448	0.00355516	0.0132232	0.0290005	0.82	1.02	0.999999	0.287	-0.019	0.83	1.237	-0.36	28.0556	22.37
K205Q	0	0.000313685	0	0	0.00415698	0	0	0.97	0.33	-0.362	0.66	1.237	-0.1	28.0556	22.37
K205R	0.00219743	0.00219743	0.00265209	0.0123014	0.0152991	0.6	0.94	0.88	1	-0.774	0.63	1.237	-0.64	28.0556	22.37
K205T	0.000439357	0.000439357	0.00100639	0.000125076	0.000345703	0.87	0.22	0.44	0.485	-0.752	0.76	1.237	-0.12	28.0556	22.37
C206F	0.000226282	0.000226282	3.8377e-05	0	0	0.14	0	0	0.448	-6.398	0.26	1.377	-0.15	23.5161	33.06
C206G	0.000192557	0.000192557	0	0	0	0	0	0	0.65	-7.708	0.51	1.377	1.53	23.5161	33.06
C206R	0.00169671	0.00169671	0.00120674	0.000878321	0.00152888	0.43	0.34	0.47	0.649	-7.198	0.59	1.377	1.29	23.5161	33.06
C206S	0.00222652	0.00222652	0.000791611	0.000283947	0.00134308	0.26	0.11	0.37	1	-5.956	0.76	1.377	0.44	23.5161	33.06
C206W	0.00042189	0.00042189	0	0	8.05454e-05	0	0	0.16	1	-7.019	0.06	1.377	1.8	23.5161	33.06
C206Y	0.00193953	0.00193953	0.000222856	0.000289243	0.000875716	0.1	0.12	0.31	1	-6.679	0.3	1.377	1.37	23.5161	33.06
I207F	0.00146875	0.00146875	0.00215619	0.00334678	0.0111292	0.68	0.71	0.9	0.291	-1.552	0.07	1.325	-0.16	27.5324	24.76
I207L	0	0.000316926	0.00028347	0.000146429	0.00183863	0.5	0.31	0.86	0.287	-0.187	0.32	1.325	0	27.5324	24.76
I207M	0.000449677	0.000449677	0.00028347	0	0.000206356	0.4	0	0.31	1	-0.31	0.11	1.325	0.01	27.5324	24.76
I207N	0.00132411	0.00132411	0.00130425	0.00695513	0.0251357	0.53	0.92	1.01	0.288	-0.606	0.49	1.325	0.34	27.5324	24.76
I207S	0.000331333	0.000331333	0.000176019	0.00195698	0.00117513	0.35	0.95	0.78	0.453	-0.591	0.73	1.325	-0.46	27.5324	24.76
I207T	0.00152135	0.00152135	0.00306952	0.00681488	0.00713863	0.81	0.88	0.83	0.463	-0.491	0.57	1.325	-0.09	27.5324	24.76
I207V	0.000712664	0.000712664	0.00246319	0.00520833	0.00324272	1.07	1.01	0.82	0.445	0.096	0.3	1.325	0.33	27.5324	24.76
Y208C	0.000734869	0.000734869	0.00160564	0.000478858	0.00774953	0.84	0.39	0.94	1	-0.644	0.01	0.7877	3.07	23.9188	35.63
Y208D	4.29506e-05	4.29506e-05	0.000300631	0	0.000336982	1.485	0	0.9	1	-2.186	0.01	0.7877	3.32	23.9188	35.63
Y208F	0.000645999	0.000645999	0.000756985	0.00206058	0.00383754	0.59	0.8	0.86	0.288	0.413	0.1	0.7877	0.82	23.9188	35.63
Y208H	0.00180131	0.00180131	0.00314284	0.00296094	0.0103129	0.75	0.63	0.86	1	-1.852	0.01	0.7877	2.51	23.9188	35.63
Y208N	0.000398432	0.000398432	0.000516799	0.00043019	0.000756123	0.63	0.52	0.65	1	-1.597	0.01	0.7877	3.19	23.9188	35.63
Y208S	0	0.00031701	0.000116488	0	0	0.27	0	0	1	-1.21	0.02	0.7877	3.25	23.9188	35.63
P209A	3.29173e-05	3.29173e-05	0.000196887	0.000609839	0.000395476	1.385	1.245	0.96	0.33	-3.067	0.53	0.8692	1.82	21.1712	32.1
P209H	0.00265796	0.00265796	0.00209271	0.00255747	0.00486223	0.46	0.49	0.64	1	-4.1	0.07	0.8692	1.48	21.1712	32.1
P209L	0.00162273	0.00162273	0.00145525	0.00177609	0.00161693	0.5	0.52	0.49	0.249	-3.945	0.39	0.8692	1.43	21.1712	32.1
P209R	0.000384156	0.000384156	0.000486641	0	0.00228585	0.62	0	0.86	0.5	-3.806	0.31	0.8692	1.35	21.1712	32.1
P209S	0.000994201	0.000994201	0.00126484	0.00161281	0.00136084	0.62	0.62	0.57	0.288	-2.978	0.44	0.8692	2.53	21.1712	32.1
P209T	0.000501235	0.000501235	0.000519756	0	0.000334947	0.55	0	0.4	0.287	-3.033	0.36	0.8692	3.08	21.1712	32.1
N210D	0.00156137	0.00156137	0.000567125	0.000576294	0.000266996	0.27	0.26	0.14	0.636	-4.867	0.05	0.0644	2.96	18.314	42.79
N210H	4.46094e-05	4.46094e-05	0	0	0	0	0	0	1	-4.9	0	0.0644	14.03	18.314	42.79
N210I	0.00177287	0.00177287	0	0	0	0	0	0	1	-8.617	0	0.0644	5.17	18.314	42.79
N210K	0.00173893	0.00173893	0	0	0	0	0	0	0.634	-5.833	0.05	0.0644	3.7	18.314	42.79
N210S	0.00145864	0.00145864	0.00103923	0.000845872	0.00154377	0.43	0.36	0.51	1	-4.733	0.01	0.0644	5.43	18.314	42.79
N210T	0.000286325	0.000286325	1.77645e-05	0	0	0.05	0	0	1	-5.8	0	0.0644	4.49	18.314	42.79
N210Y	0.000425311	0.000425311	0	0	0	0	0	0	1	-7.833	0	0.0644	7.34	18.314	42.79
H211D	9.05228e-05	9.05228e-05	0	0	0	0	0	0	0.729	-8.1	0.25	0.2038	-0.05	21.8643	43.5
H211L	0.000889254	0.000889254	0	0	0	0	0	0	1	-10.284	0.02	0.2038	-2.56	21.8643	43.5
H211N	0.000102534	0.000102534	0	0	0	0	0	0	0.334	-5.8	0.47	0.2038	-1.92	21.8643	43.5
H211P	0.00024066	0.00024066	8.71728e-06	0	0	0.03	0	0	0.673	-9.3	0.06	0.2038	2.24	21.8643	43.5
H211Q	0.000685508	0.000685508	0	0	0	0	0	0	1	-7.3	0.05	0.2038	0.45	21.8643	43.5
H211R	0.00230655	0.00230655	0.000634392	0.000776018	0.000245828	0.21	0.25	0.09	1	-7.3	0.04	0.2038	0.06	21.8643	43.5
H211Y	0.00124358	0.00124358	0	4.44692e-06	0	0	0.002	0	1	-5.7	0.02	0.2038	-0.91	21.8643	43.5
E212A	0.000132356	0.000132356	0	0	0	0	0	0	1	-6	0.01	0.1228	4.8	20.1827	48.38
E212D	0.00193345	0.00193345	0	0	0	0	0	0	0.509	-3	0.33	0.1228	3.09	20.1827	48.38
E212G	0.0013629	0.0013629	0.000707844	0.000920573	0.000296418	0.35	0.4	0.17	1	-7	0	0.1228	6.07	20.1827	48.38
E212K	0.00162101	0.00162101	0.000158201	0.000217287	2.59779e-05	0.08	0.11	0.01	1	-4	0.01	0.1228	7.91	20.1827	48.38
E212Q	1.83059e-05	1.83059e-05	0	0	0	0	0	0	1	-3	0.01	0.1228	4.27	20.1827	48.38
E212V	0.000474508	0.000474508	0	0	0	0	0	0	1	-7	0	0.1228	4.26	20.1827	48.38
Y213C	0.000800881	0.000800881	0.000300566	0.000274027	0.000214985	0.27	0.25	0.21	0.514	-8.973	0.02	0.364	2.24	21.3331	43.24
Y213D	0	0.000332887	0	0	0	0	0	0	1	-9.973	0	0.364	3.63	21.3331	43.24
Y213F	0.000704115	0.000704115	0.000560199	0.0025292	0.00284146	0.47	0.83	0.8	0.381	-3.953	0.06	0.364	-0.21	21.3331	43.24
Y213H	0.00111537	0.00111537	0.000754923	0.00197548	0.000402415	0.42	0.65	0.26	1	-4.993	0	0.364	1.52	21.3331	43.24
Y213N	0.00107304	0.00107304	0	0	0	0	0	0	1	-8.98	0	0.364	2.06	21.3331	43.24
Y213S	0	0.00031701	8.47917e-06	0	0	0.02	0	0	1	-8.973	0	0.364	2.5	21.3331	43.24
F214C	0.000676019	0.000676019	0.00070406	0	0.000355217	0.55	0	0.34	0.634	-4.126	0.15	0.5504	1.11	17.6936	45.19
F214I	0.000979485	0.000979485	0	0	0.000630226	0	0	0.39	0.451	-1.895	0.05	0.5504	-0.41	17.6936	45.19
F214L	0.0015841	0.0015841	0.00130791	0.00183738	0.00194193	0.48	0.54	0.55	0.303	-1.462	0.17	0.5504	0.24	17.6936	45.19
F214S	0.00191964	0.00191964	0.00206271	0.00247596	0.00143361	0.56	0.56	0.42	1	-4.292	0.03	0.5504	1.72	17.6936	45.19
F214V	0.000497509	0.000497509	0	0	5.13435e-05	0	0	0.09	0.448	-2.426	0.06	0.5504	-0.24	17.6936	45.19
F214Y	0.00241946	0.00241946	0.00290055	0.00179848	0.0197009	0.6	0.42	0.91	0.26	-1.649	0.31	0.5504	-1.21	17.6936	45.19
I215K	0.0014032	0.0014032	0.00152648	0.00389695	0.00405285	0.57	0.76	0.74	1	-2.825	0.79	0.8883	0.74	21.5372	33.51
I215L	0.00202784	0.00202784	0.00259088	0.00742046	0.006247	0.63	0.83	0.75	0.26	-0.836	0.29	0.8883	0.4	21.5372	33.51
I215M	0.00125588	0.00125588	0.00215726	0.00340792	0.016648	0.74	0.76	0.97	0.65	-1.17	0.11	0.8883	0.82	21.5372	33.51
I215R	0	0.000333023	0	0	0	0	0	0	0.729	-2.908	0.47	0.8883	-1.13	21.5372	33.51
I215T	0.00129124	0.00129124	0.00325011	0.00221646	0.005452	0.91	0.64	0.81	0.249	0.604	0.96	0.8883	1.42	21.5372	33.51
I215V	0.000955344	0.000955344	0.00329984	0.00620874	0.00643136	1.07	0.98	0.88	0.32	0.098	0.32	0.8883	0.49	21.5372	33.51
G216A	0.000178696	0.000178696	0.000529023	0.000645319	0.000241445	0.99	0.83	0.57	0.634	-6	0.1	0.1705	1.06	22.1901	26.23
G216E	0.00224642	0.00224642	0.00156684	0.00577937	0.00213527	0.43	0.74	0.48	1	-8	0	0.1705	-3.65	22.1901	26.23
G216R	0.00210019	0.00210019	0	0	0	0	0	0	1	-8	0	0.1705	1.09	22.1901	26.23
G216V	0.000828553	0.000828553	0.000145938	7.33769e-05	0	0.15	0.08	0	1	-9	0	0.1705	0.78	22.1901	26.23
S217A	0.000160942	0.000160942	0.000307916	0.000290104	0	0.79	0.65	0	0.249	-0.987	0.51	0.7556	0.88	19.9834	30.04
S217L	0.00152023	0.00152023	0.00102442	0.00119417	0.00131819	0.42	0.44	0.46	0.657	-4.45	0.12	0.7556	0.93	19.9834	30.04
S217P	0.00233811	0.00233811	0.00574569	0.00858756	0.0149541	0.9	0.83	0.87	0.634	-3.147	0.29	0.7556	-0.01	19.9834	30.04
S217T	0.00397963	0.00397963	0.00626388	0.0082198	0.0324847	0.71	0.69	0.91	0.303	-2.063	0.3	0.7556	1.3	19.9834	30.04
Y218C	0.00115258	0.00115258	0.00128733	0.000385033	0.00106624	0.58	0.25	0.48	1	-6.591	0	0.4232	1.96	19.5172	41.81
Y218D	0	0.000332887	0	0	0	0	0	0	1	-7.591	0	0.4232	0.28	19.5172	41.81
Y218F	0.00100507	0.00100507	0.00230336	0.00205034	0.00739873	0.87	0.68	0.89	0.299	0.216	1	0.4232	-1.5	19.5172	41.81
Y218H	0.00158377	0.00158377	0.00143162	0.00143757	0.0016445	0.51	0.47	0.5	1	-4.398	0	0.4232	-0.03	19.5172	41.81
Y218N	0.00064764	0.00064764	0	0	0	0	0	0	1	-7.193	0	0.4232	1.42	19.5172	41.81
Y218S	0	0.00031701	0	0	0	0	0	0	1	-6.591	0	0.4232	1.75	19.5172	41.81
S219A	0.000178782	0.000178782	0	0	0	0	0	0	1	-3	0	0.03075	2.65	17.2462	36.63
S219L	0.00176103	0.00176103	0	0.000150477	0	0	0.07	0	1	-6	0	0.03075	2.37	17.2462	36.63
S219P	0.00168783	0.00168783	0.00100765	0.00111933	0.000452643	0.38	0.39	0.21	1	-5	0	0.03075	-0.04	17.2462	36.63
S219T	0.00139503	0.00139503	0.0013982	0.00175386	0.00127365	0.54	0.56	0.47	1	-3	0.01	0.03075	-0.48	17.2462	36.63
T220A	0.00200752	0.00200752	0.00457665	0.0111812	0.00639473	0.86	0.94	0.76	0.509	-1.983	0.29	0.4767	0.19	20.4445	31.7
T220I	0.00240062	0.00240062	0.00136186	0.00326301	0.00147102	0.37	0.58	0.37	1	-3.91	0.04	0.4767	0.67	20.4445	31.7
T220K	0.000315459	0.000315459	0	0	0	0	0	0	1	-2.703	0.06	0.4767	-0.26	20.4445	31.7
T220P	0.000355339	0.000355339	0.0014759	0.00385608	0.0344487	1.17	1.105	1.17	0.263	-0.785	0.44	0.4767	-0.42	20.4445	31.7
T220R	0.000566134	0.000566134	0.000438698	0.000734962	0.00443347	0.46	0.56	0.9	1	-3.306	0.04	0.4767	-0.1	20.4445	31.7
T220S	0.00142641	0.00142641	0.00345256	0.0159491	0.102831	0.89	1.105	1.14	0.463	-0.616	1	0.4767	-0.08	20.4445	31.7
I221F	0.00301836	0.00301836	0.00235799	0.000815883	0.00157149	0.46	0.21	0.34	1	-3.517	0.02	0.2685	0.15	15.273	37.1
I221L	0.000302952	0.000302952	9.88385e-05	0.000372132	0.00311301	0.24	0.55	0.94	0.514	-1.517	0.14	0.2685	-0.82	15.273	37.1
I221M	0.000653142	0.000653142	0.000593193	0.00174776	0.012176	0.51	0.75	1.01	0.291	-1.872	0.2	0.2685	-0.46	15.273	37.1
I221N	0.00167501	0.00167501	0.000284886	0.000543293	0.000811003	0.14	0.24	0.32	1	-6.356	0.02	0.2685	2.62	15.273	37.1
I221S	0.00064166	0.00064166	0	0	0	0	0	0	1	-5.356	0.02	0.2685	2.96	15.273	37.1
I221T	0.00124445	0.00124445	0.000874922	0.00116454	0.00102514	0.43	0.48	0.45	1	-4.517	0.03	0.2685	2.26	15.273	37.1
I221V	0.00143964	0.00143964	0.00196463	0.000771508	0.00331989	0.65	0.34	0.69	1	-0.839	0.05	0.2685	0.11	15.273	37.1
F222C	0.000431003	0.000431003	0	0	0	0	0	0	1	-6.522	0	0.4996	3.54	17.2108	47.53
F222I	0.00147506	0.00147506	0	0	0	0	0	0	1	-5.015	0	0.4996	2.05	17.2108	47.53
F222L	0.00191944	0.00191944	0.000634811	0.000604664	7.01509e-05	0.25	0.23	0.03	1	-5.015	0.01	0.4996	0.58	17.2108	47.53
F222S	0.00195312	0.00195312	0.000634811	0.000826522	0.000283227	0.24	0.29	0.12	1	-6.522	0	0.4996	3.39	17.2108	47.53
F222V	0.000788179	0.000788179	0	0	0	0	0	0	1	-5.522	0	0.4996	2.09	17.2108	47.53
F222Y	0.00201906	0.00201906	0.002172	0.0109524	0.0218717	0.56	0.93	0.94	0.355	0.448	1	0.4996	0	17.2108	47.53
M223I	0.00204536	0.00204536	0.00178255	0.000549587	0.000494808	0.49	0.21	0.19	1	-3.833	0	0.09452	0.93	20.2027	33.85
M223K	0.00160027	0.00160027	0.000465828	6.22597e-05	0.000859347	0.22	0.03	0.34	1	-5.917	0	0.09452	1.45	20.2027	33.85
M223L	0.00132742	0.00132742	0.000918061	0.00264415	0.00289099	0.42	0.68	0.68	0.342	-2.792	0.07	0.09452	0.39	20.2027	33.85
M223R	4.56387e-05	4.56387e-05	0	0	0.000234298	0	0	0.84	1	-5.917	0	0.09452	1.29	20.2027	33.85
M223T	0.00183238	0.00183238	0.00220312	0.00161559	0.00178599	0.6	0.46	0.49	1	-5.875	0	0.09452	1.66	20.2027	33.85
M223V	0.000871536	0.000871536	0.000658363	0.000497823	0.000542889	0.45	0.36	0.38	1	-3.875	0	0.09452	1.99	20.2027	33.85
S224C	0.00214145	0.00214145	3.84731e-05	6.78568e-05	0.00013153	0.01	0.03	0.05	1	-5	0	0.01743	0.92	19.8715	37.01
S224G	0.00257003	0.00257003	0.00277454	0.0037351	0.00274112	0.56	0.59	0.51	1	-4	0	0.01743	0.67	19.8715	37.01
S224I	0.00171287	0.00171287	0	0	0	0	0	0	1	-6	0	0.01743	-0.24	19.8715	37.01
S224N	0.00321562	0.00321562	8.87117e-06	7.26948e-05	0	0.002	0.02	0	1	-3	0	0.01743	1.75	19.8715	37.01
S224R	0.00142786	0.00142786	0	0	0	0	0	0	1	-5	0	0.01743	2.75	19.8715	37.01
S224T	0.000823157	0.000823157	0.00160738	0.000450062	0.00156	0.8	0.35	0.65	1	-3	0	0.01743	-0.04	19.8715	37.01
R225G	0.00178359	0.00178359	0.000570364	0.000622142	0.00020022	0.24	0.25	0.1	1	-7	0	0.01578	4.73	19.1769	40.6
R225I	0.00179422	0.00179422	0	0	0	0	0	0	1	-8	0	0.01578	2.45	19.1769	40.6
R225K	0.000981045	0.000981045	7.42325e-05	3.13607e-05	0	0.07	0.03	0	1	-3	0	0.01578	3.54	19.1769	40.6
R225S	0.000803451	0.000803451	5.84823e-05	0	0	0.06	0	0	1	-6	0	0.01578	2.39	19.1769	40.6
R225T	1.90564e-05	1.90564e-05	0	0	0	0	0	0	1	-6	0	0.01578	2.27	19.1769	40.6
N226D	0.00221922	0.00221922	0.00107992	0.00103847	0.000895689	0.33	0.31	0.28	1	-5	0	0.01418	0.02	19.8201	38.77
N226H	0.000759978	0.000759978	0	0	0	0	0	0	1	-5	0	0.01418	0.83	19.8201	38.77
N226I	0.00135113	0.00135113	0	0	0	0	0	0	1	-9	0	0.01418	-0.63	19.8201	38.77
N226K	0.0022762	0.0022762	0	0	0	0	0	0	1	-6	0	0.01418	0.53	19.8201	38.77
N226S	0.00251213	0.00251213	0.00101976	0.00103847	0.00118566	0.29	0.29	0.32	1	-5	0	0.01418	1.62	19.8201	38.77
N226T	0.00027534	0.00027534	0	0	0	0	0	0	1	-6	0	0.01418	0.4	19.8201	38.77
N226Y	0.00205412	0.00205412	0	0	0	0	0	0	1	-8	0	0.01418	1.2	19.8201	38.77
R227C	0.00212814	0.00212814	0.000142422	0.000176205	0	0.06	0.07	0	1	-8	0	0.01578	5.3	14.9026	41.85
R227G	0.000248417	0.000248417	0	0	0	0	0	0	1	-7	0	0.01578	6.15	14.9026	41.85
R227H	0.00501559	0.00501559	0.000210187	9.88991e-05	4.81197e-05	0.04	0.01	0.0075	1	-5	0	0.01578	5.95	14.9026	41.85
R227L	0.000681796	0.000681796	0	0	0	0	0	0	1	-7	0	0.01578	3.61	14.9026	41.85
R227P	0.000749675	0.000749675	0	0	0	0	0	0	1	-7	0	0.01578	4.53	14.9026	41.85
R227S	0.00105252	0.00105252	0	0	0	0	0	0	1	-6	0	0.01578	6.36	14.9026	41.85
V228A	0.0023343	0.0023343	0.00273053	0.00171877	0.00165453	0.59	0.42	0.41	1	-4	0.08	0.08409	1.69	20.945	42.78
V228D	0.00207706	0.00207706	0	0	0	0	0	0	1	-7	0.01	0.08409	4.33	20.945	42.78
V228F	0.000389568	0.000389568	0	0	0	0	0	0	1	-5	0.01	0.08409	1.65	20.945	42.78
V228G	0.000410148	0.000410148	0	0	0	0	0	0	1	-7	0.02	0.08409	3.01	20.945	42.78
V228I	0.00246292	0.00246292	0.00232755	0.00253753	0.00188491	0.52	0.5	0.43	0.509	-1	0.11	0.08409	-0.64	20.945	42.78
V228L	0.000574781	0.000574781	0.00115409	0	2.40113e-05	0.81	0	0.04	1	-3	0.08	0.08409	0.51	20.945	42.78
R229G	0.00177598	0.00177598	0.000896851	0.00083215	0.00105612	0.34	0.31	0.37	1	-6.728	0	0.07908	4.97	18.4084	45.85
R229I	0.00181168	0.00181168	7.11055e-05	0	0	0.03	0	0	1	-7.728	0	0.07908	0.83	18.4084	45.85
R229K	0.00126595	0.00126595	0.000967813	0.00137786	0.00187211	0.45	0.52	0.59	0.349	-2.455	0.37	0.07908	1.13	18.4084	45.85
R229S	0.00136393	0.00136393	0.000100279	0	0.000222369	0.06	0	0.14	1	-5.637	0	0.07908	3.63	18.4084	45.85
R229T	0.000281596	0.000281596	0	0	0	0	0	0	1	-5.728	0	0.07908	1.54	18.4084	45.85
Q230E	0.00106668	0.00106668	0.00182476	0.00212824	0.00111734	0.74	0.68	0.51	1	-0.35	0.07	0.7014	-0.43	24.0237	37.08
Q230H	0.00297739	0.00297739	0.00348055	0.0054318	0.0111252	0.59	0.65	0.79	1	-1.188	0.01	0.7014	-2.37	24.0237	37.08
Q230K	0.000679838	0.000679838	0.000491802	0.000441602	0.00116267	0.44	0.39	0.63	0.42	-0.453	0.12	0.7014	-1.65	24.0237	37.08
Q230L	0.00156908	0.00156908	0.0015275	0.000506004	0.00494179	0.53	0.24	0.76	0.681	-2.484	0.05	0.7014	-2.2	24.0237	37.08
Q230P	0.00077027	0.00077027	0.000447996	0.000175223	0.000565171	0.38	0.18	0.42	1	-1.573	0.02	0.7014	-2.36	24.0237	37.08
Q230R	0.00204133	0.00204133	0.00512272	0.0117596	0.0105235	0.91	0.95	0.84	1	-1.031	0.04	0.7014	-1.82	24.0237	37.08
W231C	0.00162697	0.00162697	7.15127e-07	0	1.6142e-05	0	0	0.0075	1	-13	0	0.03953	2.28	26.0796	39.28
W231G	0.000160174	0.000160174	0	0	0	0	0	0	1	-13	0	0.03953	2.92	26.0796	39.28
W231L	0.0013053	0.0013053	0	0	0	0	0	0	1	-13	0	0.03953	0.46	26.0796	39.28
W231R	0.00485682	0.00485682	0.000632483	0.000790735	0.000233726	0.11	0.14	0.04	1	-14	0	0.03953	1.7	26.0796	39.28
W231S	0.000346135	0.000346135	0	0	0	0	0	0	1	-14	0	0.03953	2.83	26.0796	39.28
N232D	0.0018617	0.0018617	0.00508802	0.0182716	0.0370603	0.95	1.08	1.01	0.26	2.77	1	0.6984	-0.07	25.9902	27.73
N232H	0.000182651	0.000182651	0.000217104	0.000323418	0.00121195	0.6	0.65	0.88	0.349	-1.965	0.09	0.6984	1	25.9902	27.73
N232I	0.00158668	0.00158668	0.00223144	0.0009481	0.00112854	0.66	0.37	0.41	1	-4.588	0	0.6984	0.11	25.9902	27.73
N232K	0.00190443	0.00190443	0.00200964	0.00148519	0.00236673	0.56	0.43	0.55	1	-2.346	0.01	0.6984	-0.92	25.9902	27.73
N232S	0.00223804	0.00223804	0.00485417	0.00582926	0.00597493	0.84	0.75	0.72	0.514	-1.506	0.05	0.6984	0.2	25.9902	27.73
N232T	0.000337046	0.000337046	0.000275568	0.000745903	0.000906523	0.47	0.7	0.72	0.482	-2.34	0.08	0.6984	0.75	25.9902	27.73
N232Y	0.00103183	0.00103183	0.000894048	0.000941781	0.00273003	0.49	0.47	0.72	0.54	-4.202	0.03	0.6984	0.03	25.9902	27.73
E233A	0.000217798	0.000217798	0	0	0.00014777	0	0	0.4	1	-5.9	0	0.1461	0.24	22.6009	32.96
E233D	0.00129832	0.00129832	0.00159542	0.00186498	0.00507836	0.61	0.59	0.8	0.634	-2.967	0.07	0.1461	0.32	22.6009	32.96
E233G	0.00204389	0.00204389	0.00144584	0.0018164	0.00171053	0.43	0.47	0.45	1	-6.9	0	0.1461	1.11	22.6009	32.96
E233K	0.00153585	0.00153585	0.00101477	0.000404566	0.000732742	0.41	0.2	0.32	1	-3.9	0	0.1461	0.77	22.6009	32.96
E233Q	0	0.000326121	5.88776e-06	6.45104e-05	0	0.01	0.16	0	0.303	-2.8	0.05	0.1461	0.72	22.6009	32.96
E233V	0.00124348	0.00124348	0	0	0.000663286	0	0	0.34	1	-6.9	0	0.1461	0.58	22.6009	32.96
P234A	0.00119615	0.00119615	0.00314471	0.00339723	0.00652947	0.93	0.77	0.85	1	-4.878	0.47	0.4391	1.44	19.3271	40.67
P234L	0.00274371	0.00274371	0.00040487	0.000273444	0.00460245	0.12	0.09	0.62	1	-6.25	0.32	0.4391	-0.01	19.3271	40.67
P234Q	0.00101794	0.00101794	0.000499033	0.000293918	0.000376501	0.33	0.22	0.27	0.26	-3.878	0.09	0.4391	-0.16	19.3271	40.67
P234R	0.000844427	0.000844427	8.79668e-07	1.42909e-06	0.000145688	0.001	0.001	0.14	1	-5.361	0.07	0.4391	1.48	19.3271	40.67
P234S	0.00334867	0.00334867	0.00200868	0.0062373	0.00328064	0.38	0.66	0.49	1	-4.783	0.14	0.4391	2.2	19.3271	40.67
P234T	0.000591188	0.000591188	0	0	0.000312855	0	0	0.34	0.453	-4.711	0.41	0.4391	2.86	19.3271	40.67
A235E	0.000270355	0.000270355	0	0	0	0	0	0	1	-2.194	0	0.1348	3.34	16.4654	47.1
A235G	0.000485344	0.000485344	0.000219967	0.000262395	0.000351653	0.31	0.35	0.42	0.334	-0.846	0.16	0.1348	1.25	16.4654	47.1
A235P	0.000541428	0.000541428	0	0	0	0	0	0	1	-2.794	0.01	0.1348	-1.54	16.4654	47.1
A235S	0.00180332	0.00180332	0.000996576	0.00129442	0.00317496	0.36	0.41	0.63	0.355	1.006	1	0.1348	0.61	16.4654	47.1
A235T	0.00461221	0.00461221	3.38307e-06	0	0.000445723	0	0	0.08	1	-1.329	0.01	0.1348	2.02	16.4654	47.1
A235V	0.00328488	0.00328488	0	0	0	0	0	0	1	-3.265	0.01	0.1348	1.6	16.4654	47.1
F236C	0.000232873	0.000232873	0	0	0.000195159	0	0	0.45	1	-7.909	0	0.2194	2.21	13.7019	54.56
F236I	0.00124689	0.00124689	0	0	0	0	0	0	1	-5.939	0	0.2194	3.43	13.7019	54.56
F236L	0.00329655	0.00329655	0.000959711	0.000839057	0.00165459	0.22	0.2	0.33	1	-5.939	0.01	0.2194	0.45	13.7019	54.56
F236S	0.00239174	0.00239174	0.000934266	0.00103084	0.000917259	0.28	0.3	0.27	1	-7.909	0	0.2194	2.27	13.7019	54.56
F236V	0.000377732	0.000377732	0	0	8.32059e-05	0	0	0.18	1	-6.909	0	0.2194	1.7	13.7019	54.56
F236Y	0.00158333	0.00158333	0.00106467	0.0013849	0.00315873	0.42	0.46	0.66	0.359	-2.788	0.15	0.2194	-0.57	13.7019	54.56
T237A	0.00214731	0.00214731	0.00268878	0.00846244	0.0058871	0.62	0.85	0.73	1	-5	0	0.01395	1.79	8.9643	49.95
T237I	0.00204216	0.00204216	0	0	0	0	0	0	1	-6	0	0.01395	1	8.9643	49.95
T237K	0.000240259	0.000240259	0	0	0	0	0	0	1	-6	0	0.01395	4.32	8.9643	49.95
T237P	0.000273716	0.000273716	0	0	0	0	0	0	1	-6	0	0.01395	3.23	8.9643	49.95
T237R	0.00057005	0.00057005	0	0	0	0	0	0	1	-6	0	0.01395	4.93	8.9643	49.95
T237S	0.00137302	0.00137302	0.000296537	0.000483537	0.000293198	0.17	0.26	0.17	1	-4	0	0.01395	2.07	8.9643	49.95
V238A	0.00265571	0.00265571	0.00121731	0.0011798	0.00127036	0.32	0.3	0.32	1	-4	0	0.09039	2.13	8.6427	57.01
V238D	0.00216781	0.00216781	0	0	0	0	0	0	1	-6.3	0	0.09039	0.99	8.6427	57.01
V238F	0.00167991	0.00167991	0	0	0	0	0	0	1	-3.6	0	0.09039	1.42	8.6427	57.01
V238G	0.00052584	0.00052584	0	0	0	0	0	0	1	-7	0	0.09039	3.01	8.6427	57.01
V238I	0.00290435	0.00290435	0.00447379	0.00615353	0.0197439	0.7	0.69	0.88	0.287	0.4	1	0.09039	-0.39	8.6427	57.01
V238L	0.000793246	0.000793246	0.00065489	5.58754e-05	0.00010056	0.48	0.06	0.11	1	-1.6	0.01	0.09039	-0.6	8.6427	57.01
Q239E	0.000154527	0.000154527	0	0	0	0	0	0	0.48	-3	0.04	0.08022	-1.95	8.3496	52.28
Q239H	0.00167678	0.00167678	0	0	0.000748697	0	0	0.3	1	-5	0	0.08022	1.25	8.3496	52.28
Q239K	0.000627435	0.000627435	0	0	0	0	0	0	1	-4	0.01	0.08022	-1.96	8.3496	52.28
Q239L	0.00131361	0.00131361	0.00240778	0.00757986	0.0130546	0.77	0.95	0.93	0.595	-7	0.04	0.08022	-1.96	8.3496	52.28
Q239P	0.000228709	0.000228709	0	0	0	0	0	0	0.634	-6	0.09	0.08022	-1.09	8.3496	52.28
Q239R	0.0025237	0.0025237	0.000969898	0.000902445	0.000718475	0.28	0.26	0.22	1	-4	0.01	0.08022	-2.93	8.3496	52.28
A240E	0.000165676	0.000165676	0	0	0	0	0	0	1	-5	0	0.02009	1.58	7.2997	52.33
A240G	0.000672668	0.000672668	0.000109353	0.00137818	0.000454752	0.14	0.68	0.4	1	-4	0	0.02009	0.58	7.2997	52.33
A240P	6.88866e-05	6.88866e-05	0	0	0	0	0	0	1	-5	0	0.02009	-1.89	7.2997	52.33
A240S	0.00140089	0.00140089	0.000123343	0.000427021	0.00174003	0.08	0.23	0.55	0.645	-3	0.06	0.02009	0.61	7.2997	52.33
A240T	0.00290343	0.00290343	0	0	0.000182144	0	0	0.05	1	-4	0	0.02009	1.3	7.2997	52.33
A240V	0.0038068	0.0038068	7.93073e-06	0	0	0.002	0	0	1	-4	0	0.02009	-0.7	7.2997	52.33
S241A	0.000264425	0.000264425	8.33976e-05	0.000301882	0	0.24	0.53	0	1	-1.6	0.11	0.1724	0.56	9.7742	42.13
S241C	0.000287177	0.000287177	7.9816e-05	0.000406899	0	0.21	0.59	0	1	-4.067	0.01	0.1724	0.15	9.7742	42.13
S241F	0.00148395	0.00148395	0	8.04959e-05	0	0	0.05	0	1	-4.6	0.01	0.1724	-1.04	9.7742	42.13
S241P	0.00211647	0.00211647	0.000878515	0.000815613	0.000303908	0.29	0.27	0.12	1	-3.6	0.04	0.1724	0.96	9.7742	42.13
S241T	0.000728574	0.000728574	0.000892842	0.000843996	0.0186587	0.61	0.54	1.04	0.595	-2.533	0.21	0.1724	-1.04	9.7742	42.13
S241Y	0.00140205	0.00140205	0	0	2.63453e-05	0	0	0.01	1	-4.6	0.01	0.1724	-2.57	9.7742	42.13
G242A	0.000186382	0.000186382	1.46288e-06	3.66211e-05	0.00472435	0.0075	0.16	1.04	0.485	-6	0.32	0.1796	0.32	13.1148	40.31
G242E	0.00105977	0.00105977	0	0	0.000107875	0	0	0.09	0.595	-8	0.03	0.1796	-2.52	13.1148	40.31
G242R	0.00257875	0.00257875	0	4.78363e-05	0	0	0.01	0	1	-8	0	0.1796	2.22	13.1148	40.31
G242V	0.000591563	0.000591563	0	0	0.000239541	0	0	0.28	1	-9	0	0.1796	-0.69	13.1148	40.31
R243G	0.00106307	0.00106307	0	0	0	0	0	0	1	-7	0	0.04368	3.12	14.7839	43.04
R243L	0.00162	0.00162	0	0	0	0	0	0	1	-7	0	0.04368	0.4	14.7839	43.04
R243P	0.000356714	0.000356714	0	0	0	0	0	0	1	-7	0	0.04368	-0.54	14.7839	43.04
R243Q	0.00199582	0.00199582	0.000115168	0.0002978	0.00116742	0.05	0.12	0.36	1	-4	0	0.04368	1.45	14.7839	43.04
Q244E	0.000673393	0.000673393	0	0	0	0	0	0	1	-1.5	0.02	0.07187	-0.9	12.6141	43.84
Q244H	0.00428432	0.00428432	0.0122083	0.0473548	0.238608	0.97	1.105	1.12	0.463	1.5	0.73	0.07187	0.48	12.6141	43.84
Q244K	0.000512676	0.000512676	0	0	0	0	0	0	1	-2.5	0.03	0.07187	0.02	12.6141	43.84
Q244L	0.00120465	0.00120465	0	0.000977275	0.000205716	0	0.44	0.14	1	-5	0	0.07187	-2.41	12.6141	43.84
Q244P	0.000258208	0.000258208	0	0	0	0	0	0	1	-4	0.01	0.07187	0.73	12.6141	43.84
Q244R	0.00179394	0.00179394	0.00151487	0.00292947	0.00171923	0.48	0.62	0.48	1	-2	0.02	0.07187	0.61	12.6141	43.84
C245F	0.00100406	0.00100406	0	0	0	0	0	0	1	-5.6	0.01	0.1517	1.36	14.3643	46.46
C245G	0.000215557	0.000215557	0.000120475	0	0	0.37	0	0	1	-4.8	0	0.1517	2.16	14.3643	46.46
C245R	0.00244892	0.00244892	0.000666877	0.000821136	0.000242281	0.21	0.25	0.09	1	-5.4	0.01	0.1517	2.07	14.3643	46.46
C245S	0.0027746	0.0027746	0.00227783	0.00167863	0.0037766	0.47	0.37	0.57	1	-3.4	0.01	0.1517	1.56	14.3643	46.46
C245W	0.000457834	0.000457834	0	0	0	0	0	0	1	-6.2	0	0.1517	4.48	14.3643	46.46
C245Y	0.00263834	0.00263834	0	0	0	0	0	0	1	-5.6	0	0.1517	1.11	14.3643	46.46
Q246E	0.000247553	0.000247553	0	0	0	0	0	0	1	-1.2	0.03	0.1008	-0.01	14.0966	52.83
Q246H	0.00177235	0.00177235	0	0	0.000103888	0	0	0.05	1	-2.6	0.01	0.1008	1.69	14.0966	52.83
Q246K	0.000538625	0.000538625	0	0	0	0	0	0	0.48	-1.6	0.11	0.1008	3.5	14.0966	52.83
Q246L	0.00164209	0.00164209	0	0	0	0	0	0	0.645	-4	0.1	0.1008	-0.42	14.0966	52.83
Q246P	0.000225832	0.000225832	0	0	0	0	0	0	0.355	2.4	1	0.1008	-2.05	14.0966	52.83
Q246R	0.00258047	0.00258047	0.000909582	0.000920138	0.000377948	0.26	0.26	0.12	1	-2.2	0.08	0.1008	5.98	14.0966	52.83
L247F	0.000863838	0.000863838	0	8.89341e-05	0.000716899	0	0.09	0.45	0.595	-2.853	0.05	0.3792	-0.43	18.9417	47.17
L247I	0.00177852	0.00177852	0.00384573	0.00449088	0.00652516	0.84	0.74	0.78	0.463	-0.207	0.6	0.3792	1.97	18.9417	47.17
L247S	0.00192574	0.00192574	0.000253974	0.000283839	0.000116911	0.11	0.12	0.05	1	-4.353	0	0.3792	0.83	18.9417	47.17
L247V	0.000202434	0.000202434	0	0	0	0	0	0	1	-1.007	0.02	0.3792	1.71	18.9417	47.17
H248D	0.000917615	0.000917615	0	0	0	0	0	0	1	-9	0	0.05843	-0.06	21.9316	45.69
H248L	0.000943703	0.000943703	0	0	0	0	0	0	1	-11	0	0.05843	2.41	21.9316	45.69
H248N	0.000208885	0.000208885	0	0	0	0	0	0	1	-7	0	0.05843	0.48	21.9316	45.69
H248P	0.000704561	0.000704561	0	0	0	0	0	0	1	-10	0	0.05843	-1.06	21.9316	45.69
H248Q	0.00153087	0.00153087	0	0	0	0	0	0	1	-8	0	0.05843	3.04	21.9316	45.69
H248R	0.0020655	0.0020655	0.00113347	0.000995703	0.000370401	0.36	0.32	0.15	1	-8	0	0.05843	0.77	21.9316	45.69
H248Y	0.00382645	0.00382645	0	0	0	0	0	0	0.688	-6	0.02	0.05843	1.59	21.9316	45.69
P249A	0.000564693	0.000564693	0	0	0	0	0	0	1	-8	0	0.01966	2.46	23.2742	37.91
P249H	0.000831363	0.000831363	0	0	0	0	0	0	1	-9	0	0.01966	13.67	23.2742	37.91
P249L	0.00193245	0.00193245	0	8.30537e-05	0	0	0.04	0	1	-10	0	0.01966	2.95	23.2742	37.91
P249R	0.000276517	0.000276517	0	0	0	0	0	0	1	-9	0	0.01966	9.9	23.2742	37.91
P249S	0.00261633	0.00261633	0.00027562	0.000151685	0.000542111	0.09	0.05	0.17	1	-8	0	0.01966	3.07	23.2742	37.91
P249T	0.00149374	0.00149374	0	0	0	0	0	0	1	-8	0	0.01966	5.27	23.2742	37.91
Q250E	6.83806e-05	6.83806e-05	0	0	0.000290979	0	0	0.81	1	-2.6	0.17	0.3104	0.87	26.4752	32.43
Q250H	0.00267145	0.00267145	0.00102157	0.000255438	0.00155203	0.28	0.08	0.36	1	-4.317	0.03	0.3104	1.8	26.4752	32.43
Q250K	0.000667801	0.000667801	0.000474488	0.000172216	0.0020619	0.43	0.2	0.75	1	-3.467	0.15	0.3104	0.25	26.4752	32.43
Q250L	0.00139995	0.00139995	0	0	0.000391823	0	0	0.21	1	-6.4	0.05	0.3104	-0.08	26.4752	32.43
Q250P	0.000428033	0.000428033	0	0	0	0	0	0	1	-5.383	0.06	0.3104	1.69	26.4752	32.43
Q250R	0.00254741	0.00254741	0.00172239	0.000744867	0.00153466	0.42	0.22	0.37	1	-3.517	0.09	0.3104	0.87	26.4752	32.43
A251D	0.00130689	0.00130689	0	0	0	0	0	0	1	-5.917	0	0.06704	1.82	26.267	33.1
A251G	0.000238613	0.000238613	0.00172655	0.000575063	1.14824e-05	1.51	0.73	0.04	0.632	-3.95	0.25	0.06704	2.04	26.267	33.1
A251P	2.75412e-05	2.75412e-05	0	0	0	0	0	0	1	-4.95	0	0.06704	1.67	26.267	33.1
A251S	0.00132412	0.00132412	0.000640318	0.0052369	0.00105557	0.33	0.85	0.44	0.443	-2.9	0.25	0.06704	1.31	26.267	33.1
A251T	0.00370621	0.00370621	0	0	0.000141853	0	0	0.03	1	-3.933	0	0.06704	0.57	26.267	33.1
A251V	0.00316777	0.00316777	0.000183351	9.90159e-05	0.00138825	0.05	0.03	0.3	1	-3.983	0	0.06704	0.27	26.267	33.1
P252A	0	0.000348751	0	0	0	0	0	0	1	-7.2	0.03	0.3043	2.81	27.073	31.99
P252H	0.00305464	0.00305464	0.000810327	0.000904167	0.0014087	0.21	0.22	0.31	1	-7.8	0.01	0.3043	2.17	27.073	31.99
P252L	0.00148052	0.00148052	7.02191e-05	0	0.000662638	0.04	0	0.3	0.673	-9.1	0.07	0.3043	2.34	27.073	31.99
P252R	0.000179977	0.000179977	0	0	0	0	0	0	1	-7.9	0.02	0.3043	2.7	27.073	31.99
P252S	0.00142581	0.00142581	0.000466978	6.97645e-06	0.000569238	0.24	0.002	0.28	0.514	-6.9	0.08	0.3043	3.1	27.073	31.99
P252T	0.000689252	0.000689252	0	0	0	0	0	0	1	-7	0.02	0.3043	3.05	27.073	31.99
V253A	0.00159712	0.00159712	0.00350663	0.00318353	0.00563923	0.85	0.68	0.78	1	0.717	0.12	0.3217	0.3	26.393	31.1
V253E	0.00166959	0.00166959	0.00152154	0.00189182	0.00188469	0.51	0.53	0.53	0.48	2.417	0.21	0.3217	-0.48	26.393	31.1
V253G	0.000194653	0.000194653	0.000494203	0	0.00492067	0.91	0	1.04	1	-0.417	0.06	0.3217	0.77	26.393	31.1
V253I	0.00176337	0.00176337	0.00321194	0.00625397	0.014307	0.77	0.82	0.91	0.263	-0.989	0.04	0.3217	-1.09	26.393	31.1
V253L	0.000764436	0.000764436	0.00077557	0.00196594	0.0015383	0.54	0.74	0.66	0.724	-0.172	0.06	0.3217	-0.34	26.393	31.1
M254I	0.0021591	0.0021591	0	0	0	0	0	0	1	-4	0	0.01467	2.03	22.6495	39.49
M254K	0.000713948	0.000713948	0	0	0	0	0	0	1	-5.994	0	0.01467	4.33	22.6495	39.49
M254L	0.00335193	0.00335193	0.000921671	0.000217138	0.00170137	0.21	0.06	0.33	1	-3	0	0.01467	0.54	22.6495	39.49
M254R	0.000243726	0.000243726	0	0	0	0	0	0	1	-6	0	0.01467	6.3	22.6495	39.49
M254T	0.00185715	0.00185715	0.00143248	0.00183418	0.000609591	0.46	0.49	0.24	1	-6	0	0.01467	3.81	22.6495	39.49
M254V	0.00243091	0.00243091	0.000801741	0.000752145	0.000628174	0.25	0.23	0.2	1	-4	0	0.01467	2.44	22.6495	39.49
L255F	0.00194877	0.00194877	0.00385919	0.00487484	0.0153762	0.8	0.74	0.9	1	-1.466	0.05	1.364	0.38	27.6855	26.69
L255I	0.00153049	0.00153049	0.00218883	0.00529238	0.0130903	0.67	0.82	0.91	0.249	0.256	0.37	1.364	0.85	27.6855	26.69
L255S	0.000772962	0.000772962	0.00279125	0.00664114	0.00187176	1.09	1.05	0.7	1	-0.48	0.66	1.364	1.39	27.6855	26.69
L255V	0.000225617	0.000225617	0.000495156	0.000891163	0.00380896	0.85	0.85	0.99	0.358	0.653	0.45	1.364	1.45	27.6855	26.69
K256E	0.0020659	0.0020659	0.00344179	0.00405434	0.00490686	0.73	0.67	0.7	0.358	-2.174	0.16	0.6802	-1.02	24.4829	28.61
K256I	0.00111506	0.00111506	2.31033e-05	0.000570999	0.000299143	0.02	0.33	0.21	1	-3.842	0.22	0.6802	-0.11	24.4829	28.61
K256N	0.00306722	0.00306722	0.00319207	0.00203637	0.00486601	0.55	0.39	0.61	0.485	-2.878	0.22	0.6802	0.12	24.4829	28.61
K256Q	0.00027795	0.00027795	0.000702387	0.000625917	0.000306508	0.91	0.71	0.52	0.373	-2.113	0.2	0.6802	0.1	24.4829	28.61
K256R	0.00120605	0.00120605	0.00261218	0.0117227	0.014369	0.84	1.08	0.95	0.478	-1.677	0.22	0.6802	0.57	24.4829	28.61
K256T	0.000869383	0.000869383	0.000719091	0.00024934	0.000539716	0.48	0.22	0.38	1	-3.273	0.22	0.6802	0.27	24.4829	28.61
V257A	0.00162409	0.00162409	0.00146553	0.00756705	0.00185859	0.5	0.89	0.53	1	-3.51	0.02	0.8129	0.44	29.6968	16.42
V257D	0.00131173	0.00131173	0.000721245	0.000161416	0.00152784	0.36	0.1	0.53	1	-5.852	0.01	0.8129	0.85	29.6968	16.42
V257F	0.000854518	0.000854518	0.000432144	0	0	0.34	0	0	0.249	-3.206	0.12	0.8129	0.43	29.6968	16.42
V257G	0.000483314	0.000483314	0.000382935	0.000144333	0	0.46	0.22	0	1	-6.259	0.01	0.8129	1.61	29.6968	16.42
V257I	0.00130721	0.00130721	0.000930382	0.00184413	0.00139922	0.43	0.59	0.51	0.26	-0.103	0.84	0.8129	-0.62	29.6968	16.42
V257L	0.000324874	0.000324874	7.71939e-06	0.000298083	5.17357e-05	0.02	0.47	0.13	0.449	-1.784	0.19	0.8129	-0.78	29.6968	16.42
S258C	0.00151667	0.00151667	0.00112532	0.00352613	0.00132893	0.44	0.72	0.46	1	-3.659	0.01	0.9893	-0.08	27.769	13.95
S258G	0.00155754	0.00155754	0.00330613	0.00374954	0.00770745	0.83	0.73	0.83	0.249	0.129	1	0.9893	-0.11	27.769	13.95
S258I	0.000354107	0.000354107	0	3.52859e-05	0	0	0.09	0	1	-3.443	0.01	0.9893	0.03	27.769	13.95
S258N	0.00173465	0.00173465	0.00241127	0.00580681	0.00860186	0.66	0.81	0.83	1	-0.162	0.17	0.9893	-0.04	27.769	13.95
S258R	0.0011578	0.0011578	0.00011114	0.000565894	0.00156809	0.08	0.32	0.57	1	-1.029	0.05	0.9893	0.35	27.769	13.95
S258T	0.000671996	0.000671996	0.000568514	0.00104996	0.00241751	0.48	0.61	0.78	1	-1.403	0.07	0.9893	0.5	27.769	13.95
K259E	0.00113112	0.00113112	0.00274066	0.00351507	0.00836028	0.89	0.79	0.89	0.33	-1.777	0.17	0.8456	0.32	25.727	19.55
K259I	0.00128908	0.00128908	0.00154746	0.00234436	0.000700257	0.6	0.65	0.35	0.358	-4.891	0.03	0.8456	0.56	25.727	19.55
K259N	0.00129588	0.00129588	0.00119731	0.00705033	0.00249036	0.51	0.93	0.65	1	-2.769	0.05	0.8456	0.4	25.727	19.55
K259Q	0	0.000313685	0	0	0	0	0	0	0.32	-1.152	0.3	0.8456	0	25.727	19.55
K259R	0.00202314	0.00202314	0.00249627	0.00356553	0.010897	0.61	0.64	0.85	0.448	-1.5	0.15	0.8456	0.67	25.727	19.55
K259T	0.000541083	0.000541083	0.000124253	0.000689215	0.00108607	0.18	0.56	0.66	0.33	-2.745	0.28	0.8456	0.77	25.727	19.55
N260D	0.00124759	0.00124759	0.0014761	0.00203464	0.011678	0.6	0.62	0.92	0.26	-0.813	1	0.3049	-0.93	23.3779	19.78
N260H	0.000269771	0.000269771	0	0	0	0	0	0	0.657	-3.634	0.03	0.3049	1.78	23.3779	19.78
N260I	0.00120013	0.00120013	0.000560991	0.00040267	0.00138185	0.32	0.25	0.53	1	-6.543	0	0.3049	1.05	23.3779	19.78
N260K	0.00118035	0.00118035	0.000307687	2.78289e-06	0.000298986	0.2	0.002	0.2	0.69	-4.223	0.04	0.3049	1.81	23.3779	19.78
N260S	0.00082039	0.00082039	0.00145284	0.000759327	0.00144596	0.75	0.48	0.63	1	-3.279	0.01	0.3049	1.5	23.3779	19.78
N260T	0.00015585	0.00015585	0.0012512	0	0.00068239	1.58	0	0.81	0.649	-4.218	0.04	0.3049	1.95	23.3779	19.78
N260Y	0.0005166	0.0005166	0.00051446	0.000272977	0.000372154	0.54	0.34	0.41	1	-5.962	0	0.3049	0.2	23.3779	19.78
L261F	0.00137522	0.00137522	0.000826403	0.000983549	0.000536894	0.38	0.41	0.28	1	-0.976	0.08	0.9947	0.56	25.6194	24.44
L261I	0.000847976	0.000847976	0.00111557	0.00280786	0.000233525	0.64	0.81	0.21	0.423	-0.445	0.14	0.9947	1.59	25.6194	24.44
L261S	0.00120725	0.00120725	0.00272883	0.00196995	0.00213211	0.86	0.62	0.63	0.394	0.962	0.34	0.9947	1.8	25.6194	24.44
L261V	9.21007e-05	9.21007e-05	0.00010348	0	0.00105054	0.58	0	0.95	0.303	0.173	0.22	0.9947	1.4	25.6194	24.44
N262D	0.00141245	0.00141245	0.000337328	0.000352623	0	0.19	0.19	0	1	-1.129	0.16	1.013	-0.42	23.6039	28.47
N262H	0.000155853	0.000155853	0.000472256	0.000362979	0.0469414	0.999999	0.72	1.28	0.287	0.835	0.47	1.013	1.45	23.6039	28.47
N262I	0.000703599	0.000703599	2.99904e-05	0	0	0.04	0	0	1	-1.663	0.3	1.013	-1.69	23.6039	28.47
N262K	0.00155974	0.00155974	0.00262362	0.00384275	0.000247922	0.73	0.73	0.13	1	-0.207	0.22	1.013	-0.28	23.6039	28.47
N262S	0.000929141	0.000929141	0.0024587	0.00696005	0.0228635	0.93	1.01	1.03	1	-0.724	0.31	1.013	-0.42	23.6039	28.47
N262T	0.000597732	0.000597732	0.000809577	0.0144478	0.0085959	0.65	1.31	0.98	1	-0.985	0.3	1.013	-0.74	23.6039	28.47
N262Y	0.00076804	0.00076804	0.00238374	0.0132257	0.525887	1.01	1.225	1.355	0.303	0.703	1	1.013	-0.84	23.6039	28.47
K263E	0.00119805	0.00119805	0.00118307	0.00762066	0.00898331	0.53	0.97	0.89	0.355	-0.09	1	1.001	-0.7	27.236	28.66
K263I	0.00107634	0.00107634	0.00158956	0.00397824	0.00101233	0.68	0.83	0.48	0.26	2.262	0.25	1.001	-0.05	27.236	28.66
K263N	0.00164715	0.00164715	0.000491812	0.000345912	0.000996869	0.23	0.17	0.37	1	-0.979	0.47	1.001	-0.11	27.236	28.66
K263Q	0	0.000313685	0	0	1.43607e-05	0	0	0.04	0.517	-0.346	0.57	1.001	-0.29	27.236	28.66
K263R	0.00152571	0.00152571	0.00257565	0.00298944	0.00225101	0.73	0.67	0.59	0.249	-0.233	0.53	1.001	-0.14	27.236	28.66
K263T	0.000463149	0.000463149	0.000799174	0	0.00047021	0.74	0	0.5	1	0.09	0.55	1.001	-0.17	27.236	28.66
F264C	0.000240462	0.000240462	0	0	0	0	0	0	1	-7.9	0	0.1221	1.56	23.9524	37.5
F264I	0.00189894	0.00189894	0	0	0	0	0	0	1	-5.978	0	0.1221	1.05	23.9524	37.5
F264L	0.00279331	0.00279331	0.00140388	0.000765631	0.000491041	0.34	0.21	0.14	0.632	-5.978	0.05	0.1221	0.4	23.9524	37.5
F264S	0.00164054	0.00164054	0.000418652	0.000524743	0.000323216	0.2	0.24	0.16	1	-7.933	0	0.1221	2.33	23.9524	37.5
F264V	0.000174687	0.000174687	2.41888e-05	0	0	0.12	0	0	1	-6.967	0	0.1221	2.56	23.9524	37.5
F264Y	0.00106265	0.00106265	3.0568e-06	0	7.77715e-05	0.002	0	0.06	1	-2.928	0.01	0.1221	0.06	23.9524	37.5
V265A	0.00299922	0.00299922	0.00510666	0.00752273	0.00848837	0.74	0.74	0.74	0.26	-1.037	0.76	1.037	0.42	29.725	25.68
V265D	0.00165379	0.00165379	0.00113772	0.00124334	0.000603182	0.42	0.42	0.26	0.287	-2.871	0.64	1.037	1.08	29.725	25.68
V265F	0.000220826	0.000220826	0.00036894	0	0	0.73	0	0	1	-3	0.05	1.037	-0.55	29.725	25.68
V265G	0.000382092	0.000382092	1.2677e-05	0	0	0.03	0	0	0.634	-3.619	0.38	1.037	1.92	29.725	25.68
V265I	0.00152939	0.00152939	0.00133773	0.00205596	0.00195564	0.49	0.57	0.56	0.355	-0.572	0.19	1.037	-0.69	29.725	25.68
V265L	2.73059e-05	2.73059e-05	5.64286e-05	0	7.84838e-05	0.82	0	0.74	0.637	-1.709	0.3	1.037	-0.61	29.725	25.68
E266A	2.61509e-05	2.61509e-05	0.000597507	3.76256e-05	0	2.3	0.59	0	0.309	-1.208	0.21	1.445	0.71	32.9157	18.18
E266D	0.00155367	0.00155367	0.00191755	0.00710193	0.0238083	0.61	0.89	0.98	0.303	-0.964	0.15	1.445	0.45	32.9157	18.18
E266G	0.00213358	0.00213358	0.00249125	0.00245984	0.00807597	0.59	0.53	0.79	1	-2.267	0.08	1.445	0.69	32.9157	18.18
E266K	0.00134387	0.00134387	0.00125595	0.000862529	0.00327833	0.52	0.39	0.7	0.26	0.162	0.55	1.445	0	32.9157	18.18
E266Q	0	0.000326213	0.000346951	0	0	0.56	0	0	0.281	-0.367	0.3	1.445	0.18	32.9157	18.18
E266V	0.00136682	0.00136682	0.00238054	0.00652436	0.00217343	0.75	0.9	0.61	0.349	-2.006	0.18	1.445	0.44	32.9157	18.18
G267A	6.01566e-05	6.01566e-05	0.000106012	0.000159992	0	0.75	0.75	0	1	-3.967	0.03	0.6431	1.88	34.7917	17.51
G267E	0.000934421	0.000934421	0.00115445	0.00307701	0.00254345	0.61	0.81	0.73	0.32	-4.533	0.22	0.6431	2.03	34.7917	17.51
G267R	0.00118159	0.00118159	0.00109808	0.000634187	0.00276372	0.51	0.34	0.7	1	-5.239	0.02	0.6431	1.38	34.7917	17.51
G267V	0.00104195	0.00104195	0.000139832	1.92623e-06	0	0.11	0.001	0	1	-6.222	0.01	0.6431	2.24	34.7917	17.51
K268E	0.00242805	0.00242805	0.00440768	0.00608154	0.00743585	0.76	0.74	0.75	0.48	-1.241	0.73	1.191	1.11	31.154	23.42
K268I	0.00202827	0.00202827	0.000995962	0.000831566	0.000608087	0.33	0.29	0.23	1	-4.115	0.25	1.191	-0.48	31.154	23.42
K268N	0.00233045	0.00233045	0.0031565	0.00796863	0.00471995	0.65	0.81	0.66	0.413	-1.356	0.41	1.191	1.34	31.154	23.42
K268Q	0.000523234	0.000523234	0.00136228	0.00115581	0.00172726	0.93	0.7	0.76	0.249	-1.137	0.5	1.191	0.94	31.154	23.42
K268R	0.00185896	0.00185896	0.00392654	0.0057435	0.013698	0.83	0.79	0.89	1	-1.463	0.43	1.191	0.15	31.154	23.42
K268T	0.000542047	0.000542047	0.000684315	0.000562514	0.00142323	0.62	0.51	0.72	0.46	-2.254	0.53	1.191	1.06	31.154	23.42
E269A	4.10705e-05	4.10705e-05	9.75264e-05	0.000576663	0	0.88	1.17	0	1	-4.5	0.15	0.5257	0.46	29.1988	22.65
E269D	0.00219479	0.00219479	0.00154433	0.00217161	0.00275735	0.43	0.49	0.55	0.484	-2.4	0.2	0.5257	0.07	29.1988	22.65
E269G	0.00188964	0.00188964	0.00306755	0.00164651	0.00229898	0.72	0.46	0.54	0.443	-5.478	0.24	0.5257	0.84	29.1988	22.65
E269K	0.00121263	0.00121263	0.00133546	0.00122759	0.00204765	0.57	0.5	0.62	0.287	-2.794	0.2	0.5257	0.19	29.1988	22.65
E269Q	0.00026674	0.00026674	0.000449038	0	0	0.73	0	0	0.37	-1.917	0.14	0.5257	-0.01	29.1988	22.65
E269V	0.000626851	0.000626851	0.000367528	0.000699115	0.00134965	0.38	0.53	0.68	1	-5.333	0.06	0.5257	0.88	29.1988	22.65
H270D	0.000919445	0.000919445	0.00126365	0.000216246	0.00620799	0.65	0.19	0.88	0.445	-3.724	0.53	1.087	0.01	30.6396	20.16
H270L	0.00208976	0.00208976	0.00331695	0.00457351	0.001447	0.71	0.7	0.4	0.514	-6.317	0.23	1.087	-0.77	30.6396	20.16
H270N	0.000424877	0.000424877	0	0	5.20219e-06	0	0	0.01	0.249	-2.974	0.53	1.087	0.09	30.6396	20.16
H270P	0.000106592	0.000106592	1.18721e-05	0.000137316	0	0.1	0.56	0	1	-5.331	0.17	1.087	-0.85	30.6396	20.16
H270Q	0.00238242	0.00238242	0.00212158	0.00535651	0.00789199	0.5	0.71	0.77	0.33	-3.209	0.44	1.087	-0.25	30.6396	20.16
H270R	0.00189879	0.00189879	0.00319326	0.00214699	0.00464405	0.73	0.53	0.71	0.355	-3.699	0.41	1.087	-0.22	30.6396	20.16
H270Y	0.00223666	0.00223666	0.00263417	0.00594777	0.0336054	0.6	0.75	0.98	0.468	-3.476	0.14	1.087	-1.06	30.6396	20.16
L271F	0.000921398	0.000921398	0.000597748	0.000620461	0.000326222	0.41	0.4	0.26	1	-3.194	0.22	1.006	0.65	26.9259	26.54
L271I	0.00214263	0.00214263	0.000940125	0.000499946	0.0007909	0.31	0.18	0.26	0.673	-1.606	0.27	1.006	-0.04	26.9259	26.54
L271S	0.00109169	0.00109169	0.00171279	0.00094366	0.000735963	0.7	0.46	0.4	0.468	-3.867	0.78	1.006	1.55	26.9259	26.54
L271V	0.000634335	0.000634335	6.10491e-05	0	0.00196404	0.08	0	0.75	0.635	-2.25	0.39	1.006	-0.2	26.9259	26.54
Y272C	0.00104349	0.00104349	0.000321071	0.000374189	0.000151863	0.23	0.26	0.12	1	-8.8	0.02	0.1904	5.32	25.3375	41.15
Y272D	0	0.000332887	0	0	0	0	0	0	1	-9.628	0.03	0.1904	6.06	25.3375	41.15
Y272F	0.000794016	0.000794016	0	0	0.000142477	0	0	0.15	0.443	-3.861	0.11	0.1904	2.02	25.3375	41.15
Y272H	0.00105788	0.00105788	0.000456234	0.000536545	0.000533166	0.3	0.33	0.33	0.632	-4.956	0.12	0.1904	4.33	25.3375	41.15
Y272N	0.00160961	0.00160961	0	0	0	0	0	0	0.67	-8.767	0.21	0.1904	6.13	25.3375	41.15
Y272S	6.47821e-05	6.47821e-05	0	0	0	0	0	0	1	-8.767	0.06	0.1904	7.34	25.3375	41.15
R273C	0.00264603	0.00264603	0.000132324	0.000182382	3.60435e-06	0.04	0.06	0.001	1	-7.956	0	0.04354	1.59	22.0358	45.37
R273G	0.000530802	0.000530802	0	0	0	0	0	0	1	-6.961	0	0.04354	2.31	22.0358	45.37
R273H	0.00392579	0.00392579	0.000255232	0.000268009	0.00127426	0.06	0.06	0.24	1	-4.972	0	0.04354	2.18	22.0358	45.37
R273L	0.000926804	0.000926804	0	0	0	0	0	0	1	-6.961	0	0.04354	1.51	22.0358	45.37
R273P	0.000270021	0.000270021	0	0	0	0	0	0	1	-6.961	0	0.04354	2.27	22.0358	45.37
R273S	0.000921974	0.000921974	0	0	0	0	0	0	1	-5.967	0	0.04354	0.57	22.0358	45.37
R274G	0.00188114	0.00188114	0.000766842	0.000914178	0.000376413	0.29	0.32	0.16	1	-6.961	0	0.0158	3.96	17.2303	51.22
R274I	0.00235822	0.00235822	0	0	0	0	0	0	1	-7.956	0	0.0158	2.77	17.2303	51.22
R274K	0.00190061	0.00190061	2.80835e-05	4.643e-05	0.000109368	0.01	0.02	0.05	1	-2.978	0	0.0158	3.24	17.2303	51.22
R274S	0.00104093	0.00104093	0	0	0	0	0	0	1	-5.967	0	0.0158	2.2	17.2303	51.22
R274T	0.000182121	0.000182121	0	0	0	0	0	0	1	-5.967	0	0.0158	3.14	17.2303	51.22
L275I	0.000809503	0.000809503	0	0	2.34298e-05	0	0	0.02	1	-1.856	0.01	0.1774	1.29	17.4388	53.14
L275P	0.00169016	0.00169016	0.000521544	0.00064475	0.000150042	0.23	0.27	0.08	1	-6.561	0	0.1774	1.12	17.4388	53.14
L275Q	0.000960334	0.000960334	0	0	0	0	0	0	1	-5.428	0	0.1774	2.88	17.4388	53.14
L275R	0.00021591	0.00021591	0	0	0	0	0	0	1	-5.561	0	0.1774	5.34	17.4388	53.14
L275V	0.000970065	0.000970065	0	0	0	0	0	0	1	-2.717	0.01	0.1774	1.39	17.4388	53.14
T276A	0.00224096	0.00224096	0.000890737	0.000977075	0.000646073	0.28	0.3	0.22	1	-1.112	0	0.1413	2.42	17.6156	50.82
T276K	0.00085333	0.00085333	0	0	0	0	0	0	1	-2.107	0	0.1413	6.38	17.6156	50.82
T276M	0.00279601	0.00279601	0.000113697	0.000106618	3.26241e-05	0.03	0.03	0.01	1	-2.879	0	0.1413	3.93	17.6156	50.82
T276P	0.000360484	0.000360484	0	0	0	0	0	0	1	-2.879	0	0.1413	4.34	17.6156	50.82
T276R	0.000934674	0.000934674	0	0	0	0	0	0	1	-2.879	0	0.1413	7.38	17.6156	50.82
T276S	0.000838976	0.000838976	0.000693976	0.00330846	0.00252537	0.48	0.85	0.75	0.249	1.426	1	0.1413	0.93	17.6156	50.82
V277A	0.00183581	0.00183581	0.00182608	0.00142616	0.00155677	0.54	0.43	0.45	1	-3.978	0	0.3184	2.2	15.2712	48.35
V277D	0.00135958	0.00135958	0	0	0	0	0	0	1	-6.736	0	0.3184	2.3	15.2712	48.35
V277F	0.000893178	0.000893178	0	0	0	0	0	0	1	-4.521	0.01	0.3184	2.71	15.2712	48.35
V277G	0.000377679	0.000377679	0	0	0	0	0	0	1	-6.961	0	0.3184	3.81	15.2712	48.35
V277I	0.0022433	0.0022433	0.00477384	0.0030206	0.020804	0.83	0.57	0.92	0.303	-0.544	0.32	0.3184	-0.4	15.2712	48.35
V277L	0.000996278	0.000996278	0.00169703	0.00116797	0.00104334	0.74	0.54	0.51	0.485	-2.533	0.04	0.3184	-0.13	15.2712	48.35
R278G	0	0.000348699	0	0	0	0	0	0	1	-6.961	0	0.09622	6.65	18.0027	52.4
R278L	0.00140162	0.00140162	0	0	2.20466e-05	0	0	0.01	1	-6.961	0	0.09622	2.3	18.0027	52.4
R278P	0	0.000326637	0	0	0	0	0	0	1	-6.961	0	0.09622	7.55	18.0027	52.4
R278Q	0.00235013	0.00235013	0.000294354	0.000272816	0.000218837	0.11	0.1	0.08	0.634	-3.978	0.09	0.09622	5.33	18.0027	52.4
R278W	0.00208122	0.00208122	0.000212866	0.000203822	4.18782e-05	0.09	0.08	0.01	1	-7.956	0	0.09622	4.16	18.0027	52.4
E279A	8.07994e-05	8.07994e-05	0	0	0	0	0	0	1	-5.967	0	0.0166	3.48	17.8115	51.41
E279D	0.00207466	0.00207466	0	0	0.000352935	0	0	0.14	1	-2.972	0	0.0166	2.67	17.8115	51.41
E279G	0.00234483	0.00234483	0.000965584	0.000994308	0.000404347	0.29	0.29	0.14	1	-6.961	0	0.0166	5.15	17.8115	51.41
E279K	0.00150447	0.00150447	2.25871e-05	0.000100487	0	0.01	0.06	0	1	-3.978	0	0.0166	5.29	17.8115	51.41
E279Q	0.000362567	0.000362567	0	0	0	0	0	0	1	-2.983	0	0.0166	3.4	17.8115	51.41
E279V	0.000876671	0.000876671	0	0	0	0	0	0	1	-6.961	0	0.0166	2.32	17.8115	51.41
C280F	0.000333772	0.000333772	0	0	0	0	0	0	1	-9.03	0	0.3408	-2.42	14.6444	52.12
C280G	0.00012092	0.00012092	0	0	0	0	0	0	1	-10.225	0	0.3408	1.85	14.6444	52.12
C280R	0.00186334	0.00186334	0.000425814	0.000614638	0.000139078	0.18	0.24	0.06	1	-10.206	0	0.3408	2.69	14.6444	52.12
C280S	0.00133085	0.00133085	6.12538e-05	0	0.00039343	0.04	0	0.22	0.48	-8.383	0.03	0.3408	0.67	14.6444	52.12
C280W	0.000442673	0.000442673	0	0	0	0	0	0	1	-9.394	0	0.3408	1.97	14.6444	52.12
C280Y	0.0028979	0.0028979	0.000109862	7.48928e-05	0.00019181	0.03	0.02	0.06	1	-9.056	0	0.3408	-2.56	14.6444	52.12
A281E	0.000423693	0.000423693	0	0	0	0	0	0	1	-4.972	0	0.05116	0.7	14.8606	46.03
A281G	0.000706167	0.000706167	8.9467e-05	0.000228673	0.00019071	0.11	0.24	0.21	1	-3.978	0	0.05116	1.81	14.8606	46.03
A281P	2.22839e-05	2.22839e-05	0	0	0	0	0	0	1	-4.972	0	0.05116	1.36	14.8606	46.03
A281S	0.000393959	0.000393959	0	0	0	0	0	0	0.673	-2.983	0.03	0.05116	0.74	14.8606	46.03
A281T	0.00495318	0.00495318	0.000106542	0.000131668	7.19302e-05	0.02	0.02	0.01	1	-3.978	0	0.05116	-0.4	14.8606	46.03
A281V	0.00374399	0.00374399	0.000219234	0.000148393	0.000179912	0.05	0.03	0.04	1	-3.978	0	0.05116	-0.08	14.8606	46.03
R282G	0.000844083	0.000844083	0	0	0	0	0	0	1	-6.961	0.01	0.04291	5.58	16.9487	48.01
R282L	0.00103555	0.00103555	0	0	4.75833e-05	0	0	0.04	1	-6.961	0	0.04291	3.12	16.9487	48.01
R282P	7.32886e-05	7.32886e-05	0	0	0	0	0	0	1	-6.961	0	0.04291	5.25	16.9487	48.01
R282Q	0.00204691	0.00204691	0.000207947	0.0013696	0.00132041	0.09	0.4	0.39	1	-3.978	0	0.04291	3.99	16.9487	48.01
V283A	0.00159409	0.00159409	0.00196748	0.004757	0.0010791	0.61	0.78	0.4	1	-3.839	0	0.2908	1.72	15.5931	53.05
V283E	0.00149813	0.00149813	0	0	0	0	0	0	1	-5.828	0	0.2908	4.2	15.5931	53.05
V283G	0.000376926	0.000376926	0	0	0	0	0	0	1	-6.823	0	0.2908	3.63	15.5931	53.05
V283L	0.00185485	0.00185485	0.00537047	0.0175801	0.0748688	0.98	1.07	1.09	0.355	-1.02	0.08	0.2908	-0.36	15.5931	53.05
V283M	0.00356376	0.00356376	0.00126904	0.000410722	0.00163414	0.26	0.1	0.31	1	-1.932	0	0.2908	0.2	15.5931	53.05
Q284E	0.00034037	0.00034037	0	0	0	0	0	0	1	-2.983	0	0.01564	-1.7	9.6853	57.76
Q284H	0.00230988	0.00230988	0	0	0.000129964	0	0	0.05	1	-4.972	0	0.01564	1.52	9.6853	57.76
Q284K	0.000303936	0.000303936	0	0	0	0	0	0	1	-3.978	0	0.01564	1.56	9.6853	57.76
Q284L	0.00191746	0.00191746	0	0	2.37216e-05	0	0	0.01	1	-6.961	0	0.01564	-2.3	9.6853	57.76
Q284P	0.000205042	0.000205042	0	0	0	0	0	0	1	-5.967	0	0.01564	1.66	9.6853	57.76
Q284R	0.00255246	0.00255246	0.000667484	0.000685504	0.000200792	0.2	0.21	0.07	1	-3.978	0	0.01564	8.14	9.6853	57.76
G285A	3.6708e-05	3.6708e-05	0.000151299	0	0.000193784	1.16	0	0.84	1	-1.533	0.32	0.1538	2.32	15.178	41.95
G285E	0.0015827	0.0015827	4.42506e-05	1.05303e-05	0.000698807	0.02	0.005	0.3	1	-2.956	0.05	0.1538	2.97	15.178	41.95
G285R	0.000967459	0.000967459	0	1.05303e-05	0	0	0.01	0	1	-3.056	0.04	0.1538	-0.65	15.178	41.95
G285V	0.000736086	0.000736086	0	0	0	0	0	0	1	-3.117	0.08	0.1538	1.6	15.178	41.95
F286C	0.00048503	0.00048503	0	0	0	0	0	0	1	-7.956	0	0.02176	4.16	10.374	53.89
F286I	0.000861112	0.000861112	0	0	0	0	0	0	1	-5.967	0	0.02176	2.18	10.374	53.89
F286L	0.00314473	0.00314473	0.000842813	0.000935755	0.000336854	0.21	0.22	0.09	1	-5.967	0	0.02176	0.97	10.374	53.89
F286S	0.00227823	0.00227823	0.0010624	0.00120905	0.000456953	0.32	0.34	0.16	1	-7.956	0	0.02176	6.08	10.374	53.89
F286V	0.000414175	0.000414175	0	0	0	0	0	0	1	-6.961	0	0.02176	2.51	10.374	53.89
F286Y	0.00124809	0.00124809	0	0	6.37526e-05	0	0	0.04	1	-2.983	0	0.02176	0.73	10.374	53.89
P287A	0.00020705	0.00020705	0.000740464	0	0	1.09	0	0	1	-7.606	0.01	0.1639	1.98	16.9673	36.73
P287L	0.00126538	0.00126538	7.5355e-05	0.000202765	0.000332746	0.05	0.13	0.2	1	-9.594	0	0.1639	1.25	16.9673	36.73
P287Q	0.00101472	0.00101472	0.00057845	0.00039732	0.000531508	0.37	0.28	0.34	1	-7.506	0	0.1639	2.19	16.9673	36.73
P287R	0.000491128	0.000491128	0.000139308	0	0	0.22	0	0	0.645	-8.55	0.03	0.1639	1.29	16.9673	36.73
P287S	0.00100915	0.00100915	0.000842789	0.00124039	0.00367022	0.48	0.55	0.78	0.54	-7.506	0.03	0.1639	2.32	16.9673	36.73
P287T	0.000830908	0.000830908	0.000497443	0.00154033	0.000795948	0.38	0.66	0.48	1	-7.556	0	0.1639	1.53	16.9673	36.73
D288A	0.000328327	0.000328327	0	0	8.02597e-05	0	0	0.19	0.635	-7.817	0.02	0.1123	3.66	20.3696	36.44
D288E	0.00194663	0.00194663	0.000645781	0.00109655	0.00156138	0.25	0.36	0.44	0.4	-3.894	0.02	0.1123	0.07	20.3696	36.44
D288G	0.00211747	0.00211747	0.000965554	0.000836635	0.000699475	0.32	0.28	0.24	1	-6.794	0	0.1123	4.23	20.3696	36.44
D288H	0.000283458	0.000283458	0	0	0	0	0	0	1	-6.767	0	0.1123	3.89	20.3696	36.44
D288N	0.00118644	0.00118644	0.00256442	0.00395769	0.00236975	0.84	0.81	0.66	0.445	-4.694	0.02	0.1123	1.35	20.3696	36.44
D288V	0.000866752	0.000866752	0	0	0	0	0	0	1	-8.811	0	0.1123	4.52	20.3696	36.44
D288Y	0.00177534	0.00177534	0	0	0	0	0	0	1	-8.783	0	0.1123	3.84	20.3696	36.44
D289A	0	0.000314229	0.000316774	0	0	0.54	0	0	0.468	-4.576	0.4	0.9583	0.21	20.1955	28.88
D289E	0.0026971	0.0026971	0.00425364	0.0329362	0.0201195	0.71	1.13	0.89	0.355	-2.031	0.58	0.9583	-0.27	20.1955	28.88
D289G	0.00186529	0.00186529	0.00279813	0.00197856	0.00201947	0.69	0.51	0.51	0.634	-4.109	0.29	0.9583	0.25	20.1955	28.88
D289H	0	0.00032609	0	0	0	0	0	0	1	-3.889	0.08	0.9583	0.14	20.1955	28.88
D289N	0.000727879	0.000727879	0.00154005	0.00194679	0.00618294	0.83	0.75	0.91	0.263	-1.457	0.58	0.9583	0.17	20.1955	28.88
D289V	0.00245421	0.00245421	0.000958246	0.000226646	0.00126092	0.28	0.08	0.33	1	-5.685	0.14	0.9583	0.47	20.1955	28.88
D289Y	0.000381459	0.000381459	0.000341637	0	0	0.5	0	0	1	-5.751	0.03	0.9583	-0.66	20.1955	28.88
F290C	0.000547522	0.000547522	0	0	5.63649e-05	0	0	0.09	1	-7.531	0	0.2516	2.8	13.0148	49.14
F290I	0.0011674	0.0011674	7.47302e-05	0	5.26737e-05	0.06	0	0.04	0.4	-5.683	0.02	0.2516	2.21	13.0148	49.14
F290L	0.00206751	0.00206751	0.000704207	0.000756692	0.000846279	0.25	0.26	0.29	0.645	-5.683	0.09	0.2516	1.43	13.0148	49.14
F290S	0.0016053	0.0016053	0.000600162	0.000578256	0.00018002	0.27	0.26	0.1	1	-7.397	0	0.2516	4.86	13.0148	49.14
F290V	0.00122996	0.00122996	0	0	0.000480851	0	0	0.28	1	-6.603	0	0.2516	1.43	13.0148	49.14
F290Y	0.00190102	0.00190102	0.00192675	0.00236731	0.0085258	0.54	0.55	0.82	0.355	-2.525	0.11	0.2516	0.15	13.0148	49.14
I291F	0.000343131	0.000343131	9.67043e-05	0.000328898	0.00081208	0.22	0.49	0.7	0.484	-1.867	0.35	0.9495	0.06	16.4728	32.75
I291L	0	0.000316926	0	0	0	0	0	0	0.26	-0.594	0.54	0.9495	0.01	16.4728	32.75
I291M	0.000462621	0.000462621	0.000658468	0.001272	0.00357679	0.67	0.76	0.9	1	-0.753	0.19	0.9495	0.34	16.4728	32.75
I291N	0.0024598	0.0024598	0.0033296	0.00220036	0.00886729	0.65	0.47	0.78	0.5	-2.6	0.56	0.9495	1.53	16.4728	32.75
I291S	0.000132603	0.000132603	8.58454e-06	0.000427138	0.00149054	0.06	0.8	0.95	0.673	-2.008	0.81	0.9495	2.38	16.4728	32.75
I291T	0.000991787	0.000991787	0.00164982	0.00180249	0.00248792	0.73	0.65	0.71	0.427	-1.594	0.66	0.9495	1.43	16.4728	32.75
I291V	0.000889368	0.000889368	0.00166083	0.000869216	0.0222004	0.78	0.49	1.04	0.435	-0.014	0.47	0.9495	0.92	16.4728	32.75
F292C	0.00019047	0.00019047	3.91697e-05	0.00127752	0	0.17	0.98	0	1	-7.93	0	0.09595	3.81	12.0746	44.74
F292I	0.00145614	0.00145614	0.0016595	0.00077518	0.00294366	0.58	0.34	0.66	0.4	-5.941	0.01	0.09595	1.11	12.0746	44.74
F292L	0.0033365	0.0033365	0.00532898	0.00958786	0.0078733	0.71	0.77	0.7	0.373	-5.936	0.01	0.09595	0.64	12.0746	44.74
F292S	0.00231703	0.00231703	0.00125729	0.0011871	0.000449063	0.36	0.33	0.16	1	-7.932	0	0.09595	5.69	12.0746	44.74
F292V	0.000846111	0.000846111	2.7678e-05	4.17588e-05	0.000407033	0.03	0.04	0.32	1	-6.933	0	0.09595	2.07	12.0746	44.74
F292Y	0.00159867	0.00159867	0	5.18056e-05	8.03454e-05	0	0.03	0.04	0.365	-2.96	0.02	0.09595	0.65	12.0746	44.74
H293D	0.000191952	0.000191952	0.000710205	0	0.00758692	1.105	0	1.085	0.468	-1.992	0.21	0.9287	0.53	15.0423	38.05
H293L	0.000632864	0.000632864	0.00109962	0.00219204	0.000137542	0.75	0.82	0.17	0.355	-0.95	0.63	0.9287	-1.4	15.0423	38.05
H293N	0.000305006	0.000305006	0.000795389	7.39466e-05	0.000385188	0.93	0.19	0.55	1	-1.689	0.29	0.9287	-0.37	15.0423	38.05
H293P	0	0.000314229	0	0	0	0	0	0	0.645	-2.556	0.21	0.9287	1.93	15.0423	38.05
H293Q	0.00245845	0.00245845	0.00508332	0.00464884	0.00881291	0.82	0.66	0.78	0.493	-1.236	0.28	0.9287	-0.12	15.0423	38.05
H293R	0.00192734	0.00192734	0.00407498	0.00247529	0.00591131	0.83	0.56	0.75	1	-1.669	0.33	0.9287	-0.6	15.0423	38.05
H293Y	0.00128293	0.00128293	0.00254166	0.00474621	0.0276204	0.8	0.83	1.02	0.26	1.494	1	0.9287	-0.48	15.0423	38.05
Y294C	0.00198789	0.00198789	0.000878459	0.000714536	0.00118739	0.31	0.26	0.37	1	-8.95	0.02	0.2054	5.47	15.3866	42.27
Y294D	4.50483e-05	4.50483e-05	0	0	0	0	0	0	1	-9.944	0.12	0.2054	7.04	15.3866	42.27
Y294F	0.000585365	0.000585365	0.000166442	0	6.11469e-05	0.22	0	0.09	1	-3.978	0.04	0.2054	2.05	15.3866	42.27
Y294H	0.000901508	0.000901508	0.000311366	0.000310912	0.000181474	0.26	0.25	0.16	1	-4.972	0.05	0.2054	4.61	15.3866	42.27
Y294N	0.000734814	0.000734814	0	0	0	0	0	0	0.632	-8.95	0.3	0.2054	5.04	15.3866	42.27
Y294S	0.00042442	0.00042442	0	0	0	0	0	0	0.517	-8.95	0.14	0.2054	6.46	15.3866	42.27
E295A	1.75523e-05	1.75523e-05	0.000137466	0	0	1.56	0	0	0.435	-1.916	0.74	1.67	1.77	17.6979	27.6
E295D	0.00224527	0.00224527	0.00592671	0.0183293	0.0489948	0.93	1.03	1.02	0.26	0.251	0.69	1.67	-0.44	17.6979	27.6
E295G	0.00209499	0.00209499	0.00321182	0.00571804	0.00782429	0.7	0.76	0.79	0.523	-2.364	0.45	1.67	1.37	17.6979	27.6
E295K	0.00117169	0.00117169	0.00350335	0.00585263	0.00503577	0.99	0.91	0.81	0.287	-0.03	1	1.67	-0.05	17.6979	27.6
E295Q	0	0.000326121	0.000183846	0	0	0.37	0	0	0.32	-0.369	0.6	1.67	1.78	17.6979	27.6
E295V	0.000981255	0.000981255	0.00146262	0.00827025	0.0165815	0.68	1.04	0.99	0.645	-2.882	0.31	1.67	0.33	17.6979	27.6
S296C	0.00152263	0.00152263	0.00326108	0.00236584	0.0145349	0.84	0.61	0.93	1	-3.252	0.02	0.9844	0.74	15.9304	36.89
S296G	0.0024368	0.0024368	0.00469514	0.00585809	0.0169646	0.79	0.72	0.88	0.33	-0.987	0.18	0.9844	1.25	15.9304	36.89
S296I	0.000749997	0.000749997	0.000483012	0.000996828	0.000536505	0.4	0.57	0.41	1	-3.404	0.06	0.9844	-0.06	15.9304	36.89
S296N	0.00195907	0.00195907	0.00329572	0.015377	0.0433473	0.73	1.02	1.02	0.26	1.565	1	0.9844	-0.03	15.9304	36.89
S296R	0.00183124	0.00183124	0.00360484	0.00861053	0.0384563	0.8	0.9	1.02	0.287	-1.023	0.53	0.9844	0.36	15.9304	36.89
S296T	0.000266367	0.000266367	0.000302888	0.00104135	0.000395305	0.58	0.85	0.59	0.463	-0.997	0.27	0.9844	0.91	15.9304	36.89
L297F	0.000749485	0.000749485	0	0	0	0	0	0	1	-2.692	0.01	0.7645	2.45	14.771	47.89
L297M	0.00129724	0.00129724	0.00134419	0.00218056	0.00236087	0.55	0.63	0.64	0.595	-0.89	0.04	0.7645	1.05	14.771	47.89
L297S	0.00202947	0.00202947	0.00085907	0.000902453	0.000835542	0.3	0.3	0.29	1	-4.054	0	0.7645	2.45	14.771	47.89
L297V	0.000593836	0.000593836	0.000131386	0	0.00049299	0.18	0	0.45	0.287	0.386	0.58	0.7645	0.96	14.771	47.89
L297W	0.00025943	0.00025943	0	0	0	0	0	0	1	-4.757	0	0.7645	7.34	14.771	47.89
N298D	0.00190367	0.00190367	0.00433221	0.00557138	0.00804553	0.86	0.78	0.81	0.281	-1.225	0.78	0.8033	-1.16	11.4839	43.05
N298H	0.000127023	0.000127023	6.44064e-05	9.94939e-05	0.000972964	0.34	0.44	0.9	1	-2.287	0.06	0.8033	0.25	11.4839	43.05
N298I	0.00196712	0.00196712	0.00225673	0.000277573	0.00341955	0.59	0.12	0.63	0.634	-3.882	0.13	0.8033	-0.69	11.4839	43.05
N298K	0.00298824	0.00298824	0.00181257	0.00455383	0.00442373	0.39	0.61	0.59	0.509	-2.129	0.52	0.8033	1.31	11.4839	43.05
N298S	0.00219786	0.00219786	0.00411229	0.00658589	0.0113772	0.78	0.78	0.84	0.358	-0.879	0.42	0.8033	1.04	11.4839	43.05
N298T	0.000473123	0.000473123	0.00100594	0	0.00636814	0.83	0	0.97	0.427	-1.779	0.44	0.8033	0.77	11.4839	43.05
N298Y	0.00118263	0.00118263	0.000414903	0.00265196	0.00127476	0.26	0.71	0.51	1	-3.779	0.02	0.8033	0.02	11.4839	43.05
D299A	5.88473e-05	5.88473e-05	0.000280315	0.000306353	0	1.245	0.92	0	0.463	-2.474	0.65	0.7241	-0.34	10.8817	42.61
D299E	0.00216731	0.00216731	0.00155712	0.00143884	0.00700006	0.43	0.39	0.76	0.484	-1.709	0.59	0.7241	-1.49	10.8817	42.61
D299G	0.00262086	0.00262086	0.00176823	0.00165284	0.00107036	0.42	0.38	0.28	1	-3.15	0.16	0.7241	1.03	10.8817	42.61
D299H	0	0.00032609	0	0	7.57986e-06	0	0	0.02	0.443	-3.133	0.1	0.7241	0.09	10.8817	42.61
D299N	0.000981173	0.000981173	0.000839988	0.00402394	0.00717912	0.49	0.86	0.89	0.281	-2.031	0.51	0.7241	-0.12	10.8817	42.61
D299V	0.00128292	0.00128292	0.000785386	0.00169576	0.00238785	0.39	0.57	0.65	0.365	-4.047	0.16	0.7241	0.08	10.8817	42.61
D299Y	0.00052001	0.00052001	0.000143809	0.000150782	0	0.21	0.22	0	0.334	-4.311	0.11	0.7241	0.52	10.8817	42.61
G300A	0.000656714	0.000656714	0.00197333	0.00289368	0.00486912	0.999999	0.88	0.89	0.263	-3.653	0.39	0.5869	-1.78	11.2471	41.81
G300C	0.000868644	0.000868644	7.66867e-05	1.33684e-06	0.000101529	0.08	0.001	0.1	1	-6.868	0.01	0.5869	0.26	11.2471	41.81
G300D	0.0029593	0.0029593	4.24575e-05	9.79919e-05	0	0.01	0.03	0	1	-5.804	0.05	0.5869	2.76	11.2471	41.81
G300R	0.000175576	0.000175576	0	0	0	0	0	0	1	-6.336	0.1	0.5869	4.43	11.2471	41.81
G300S	0.00190538	0.00190538	0.000193066	6.52938e-05	0.000400889	0.09	0.03	0.17	1	-4.347	0.07	0.5869	-0.04	11.2471	41.81
G300V	0.000530701	0.000530701	0	0.000757403	5.93973e-05	0	0.59	0.1	0.635	-6.868	0.12	0.5869	-0.64	11.2471	41.81
Y301C	0.00147964	0.00147964	0.000406898	0.000556957	0.000173469	0.21	0.27	0.1	1	-8.95	0	0.02259	5.03	9.7814	59.58
Y301D	0.000169351	0.000169351	0	0	0	0	0	0	1	-9.944	0	0.02259	4.74	9.7814	59.58
Y301F	0.00181722	0.00181722	0	0	0	0	0	0	1	-3.978	0	0.02259	1.87	9.7814	59.58
Y301H	0.00124504	0.00124504	0.000790553	0.000524625	0.000587883	0.4	0.29	0.32	1	-4.972	0	0.02259	5.24	9.7814	59.58
Y301N	0.000455439	0.000455439	0	0	0	0	0	0	1	-8.95	0	0.02259	4.74	9.7814	59.58
Y301S	0	0.00031701	0	0	0	0	0	0	1	-8.95	0	0.02259	5.18	9.7814	59.58
K302E	0.0011096	0.0011096	0.000348741	0.000293676	5.33055e-05	0.24	0.2	0.04	1	-3.978	0	0.04952	0.94	6.9346	52.48
K302I	0.00380567	0.00380567	0.00200468	0.000172776	0.00150807	0.35	0.04	0.28	1	-7.956	0	0.04952	0.35	6.9346	52.48
K302N	0.00323681	0.00323681	0.00182214	0.000460957	0.00183233	0.37	0.12	0.36	1	-4.972	0	0.04952	1.08	6.9346	52.48
K302Q	5.1063e-05	5.1063e-05	0	0	0	0	0	0	1	-3.978	0	0.04952	0.34	6.9346	52.48
K302R	0.00229096	0.00229096	0.00227377	0.00428888	0.0165937	0.54	0.66	0.89	0.642	-2.983	0.02	0.04952	0.12	6.9346	52.48
K302T	0.000893217	0.000893217	0.000472936	9.58392e-05	0.000737932	0.35	0.09	0.45	0.473	-5.967	0.02	0.04952	2.2	6.9346	52.48
M303I	0.001986	0.001986	0	3.61849e-05	0.00082121	0	0.01	0.29	0.485	-3.978	0.04	0.05597	-0.31	6.9383	54.43
M303K	0.00268455	0.00268455	0	0	0	0	0	0	1	-5.967	0	0.05597	-0.84	6.9383	54.43
M303L	0.0033332	0.0033332	0.000816223	0.00012579	0.00117163	0.19	0.03	0.26	1	-2.983	0.04	0.05597	-0.55	6.9383	54.43
M303R	0	0.000333117	0	0	0	0	0	0	1	-5.967	0	0.05597	0.44	6.9383	54.43
M303T	0.00156692	0.00156692	0.000390845	0.000450609	0.000249664	0.2	0.22	0.13	1	-5.967	0.01	0.05597	1.43	6.9383	54.43
M303V	0.0021348	0.0021348	0.000715464	0.000932237	0.000826752	0.25	0.3	0.27	0.645	-3.978	0.1	0.05597	0.97	6.9383	54.43
I304F	0.00347783	0.00347783	0	0	0	0	0	0	1	-3.911	0	0.2371	4.42	8.2745	58.5
I304L	0.000186038	0.000186038	0	0	2.87868e-05	0	0	0.13	0.468	-1.856	0.02	0.2371	0.56	8.2745	58.5
[truncated: 160 more rows]

## Sheet: Syn
Mutation	f(G0)	f(G3)	f(G7)	f(G17)	Wrel G3	Wrel G7	Wrel G17
[truncated: 321 more rows]

[truncated: 2 more sheets: nonSense, # of nt exchanges]
